# Supplementary material
Source: PubMed Central journal article supplement (PMC3049645)
Supplement: pr100985s_si_001.pdf [file pr100985s_si_001.pdf]

Supplemental Table 1. *S. pombe* strains used in this study

| Strain number<br>KLG | Genotype                                                                       |
|----------------------|--------------------------------------------------------------------------------|
| 246                  | <i>ade6-M210 ura4-D18 leu1-32 h-</i>                                           |
| 6303                 | <i>ubp9-TAP::kanR ade6-M210 ura4-D18 leu1-32 h-</i>                            |
| 6918                 | <i>ubp9-TAP::kanR nda3-km311 ade6-M210 ura4-D18 leu1-32 h-</i>                 |
| 7027                 | <i>bun107-TAP::kanR ade6-M216 ura4-D18 leu1-32 h+</i>                          |
| 7155                 | <i>uch1-TAP::kanR ade6-M210 ura4-D18 leu1-32 h-</i>                            |
| 7156                 | <i>uch2-TAP::kanR ade6-M210 ura4-D18 leu1-32 h-</i>                            |
| 7157                 | <i>ubp4-TAP::kanR ade6-M210 ura4-D18 leu1-32 h-</i>                            |
| 7158                 | <i>ubp7-TAP::kanR ade6-M210 ura4-D18 leu1-32 h-</i>                            |
| 7159                 | <i>ubp8-TAP::kanR ade6-M210 ura4-D18 leu1-32 h-</i>                            |
| 7162                 | <i>ubp14-TAP::kanR ade6-M210 ura4-D18 leu1-32 h-</i>                           |
| 7164                 | <i>ubp2-TAP::kanR ade6-M210 ura4-D18 leu1-32 h-</i>                            |
| 7165                 | <i>ubp5-TAP::kanR ade6-M210 ura4-D18 leu1-32 h-</i>                            |
| 7166                 | <i>bun62-TAP::kanR ade6-M210 ura4-D18 leu1-32 h-</i>                           |
| 7422                 | <i>ubp9-GFP::kanR ade6-M210 ura4-D18 leu1-32 h-</i>                            |
| 7512                 | <i>ubp9-GFP::kanR bun107::ura4+ ade6-M210 ura4-D18 leu1-32 h-</i>              |
| 7513                 | <i>ubp9-GFP::kanR bun62::ura4+ ade6-M210 ura4-D18 leu1-32 h+</i>               |
| 7869                 | <i>sst2-TAP::kanR ade6-M210 ura4-D18 leu1-32 h-</i>                            |
| 7879                 | <i>ubp9-GFP::kanR bun107::ura4+ bun62::ura4+ ade6-M210 ura4-D18 leu1-32 h+</i> |
| 8319                 | <i>rpn11-TAP::kanR ade6-M210 ura4-D18 leu1-32 h-</i>                           |
| 8321                 | <i>otu1-TAP::kanR ade6-M210 ura4-D18 leu1-32 h-</i>                            |
| 8530                 | <i>Ubp9-TAP::kanR cdc25-22 ade6-M21x ura4-D18 leu1-32 h-</i>                   |
| 9146                 | <i>uch1-TAP::kanR nda3-km311 ade6-M21x ura4-D18 leu1-32 h-</i>                 |
| 9147                 | <i>uch2-TAP::kanR nda3-km311 ade6-M21x ura4-D18 leu1-32 h-</i>                 |
| 9149                 | <i>ubp6-TAP::kanR nda3-km311 ade6-M21x ura4-D18 leu1-32 h-</i>                 |
| 9150                 | <i>ubp8-TAP::kanR nda3-km311 ade6-M21x ura4-D18 leu1-32 h-</i>                 |
| 9152                 | <i>ubp12-TAP::kanR nda3-km311 ade6-M21x ura4-D18 leu1-32 h-</i>                |
| 9153                 | <i>ubp14-TAP::kanR nda3-km311 ade6-M21x ura4-D18 leu1-32 h-</i>                |
| 9154                 | <i>ubp15-TAP::kanR nda3-km311 ade6-M21x ura4-D18 leu1-32 h-</i>                |
| 9155                 | <i>rpn11-TAP::kanR nda3-km311 ade6-M21x ura4-D18 leu1-32 h-</i>                |
| 9162                 | <i>otu2-linker TAP::kanR ade6-M210 ura4-D18 leu1-32 h-</i>                     |
| 9163                 | <i>ubp1-linker TAP::kanR ade6-M210 ura4-D18 leu1-32 h-</i>                     |
| 9165                 | <i>ubp11-linker TAP::kanR ade6-M210 ura4-D18 leu1-32 h-</i>                    |
| 9167                 | <i>sfp47-TAP::kanR ade6-M210 ura4-D18 leu1-32 h+</i>                           |
| 9181                 | <i>ftp105-linker TAP::kanR ade6-M210 ura4-D18 leu1-32 h-</i>                   |
| 9194                 | <i>ubp16-linker TAP::kanR ura4-D18 leu1-32 h-</i>                              |
| 9301                 | <i>ubp16-linker TAP::kanR ade6-M21x ura4-D18 leu1-32 h-</i>                    |
| 9303                 | <i>otu1-TAP::kanR ade6-M21x ura4-D18 leu1-32 h-</i>                            |
| 9616                 | <i>ubp3-TAP::kanR ura4-D18 leu1-32 h-</i>                                      |
| 9617                 | <i>ubp6-TAP::kanR ura4-D18 leu1-32 h-</i>                                      |
| 9618                 | <i>ubp15-TAP::kanR ura4-D18 leu1-32 h-</i>                                     |
| 9619                 | <i>ubp12-TAP::kanR ura4-D18 leu1-32 h-</i>                                     |

Supplemental Table 2. Phosphorylation sites identified in DUBs and their partners

| #  | Protein | Sequence                                                                                                | Site(s)              | # PO4 | TSC | Precursor mass | Error (Da) | z | Obs. z | MM score | FDR    | Motif           | Kinase/binding motif                    | Refs.          |
|----|---------|---------------------------------------------------------------------------------------------------------|----------------------|-------|-----|----------------|------------|---|--------|----------|--------|-----------------|-----------------------------------------|----------------|
| 1  | Ubp2    | LIQDLDFVDS <sub>s</sub> PSAGWNPWSPHSSR                                                                  | S25                  | 1     | 5   | 2904.998       | -0.306     | 3 | 3      | 51.4192  | 0      | sP              | proline-directed (WW-IV)                |                |
| 2  |         | LIQDLDFVDS <sub>s</sub> PSAGWNPW <sub>s</sub> PHSSR                                                     | S35                  | 1     | 5   | 2906.078       | 0.774      | 3 | 2,3    | 43.2641  | 0      | sP              | proline-directed (WW-IV)                |                |
| 3  |         | DRIPVYEEEEELPEPHVt <sub>s</sub> PTK                                                                     | T112/S113            | 1     | 4   | 2707.345       | 0.069      | 2 | 2      | 36.5345  | 0      | sPxK            | proline-directed/FHA-2 pT binding motif |                |
| 4  |         | IPVYEEEEELPEPHVt <sub>s</sub> PTK                                                                       | S113                 | 1     | 20  | 2436.338       | 0.191      | 3 | 2,3    | 54.0142  | 0      | sPxK            | proline-directed, CDK                   | X <sup>a</sup> |
| 5  |         | IPVYEEEEELPEPHVt <sub>s</sub> PTKSEFATTSTCMK                                                            | S113                 | 1     | 31  | 3680.258       | 0.597      | 3 | 2,3    | 47.9035  | 0      | sPxK            | proline-directed, CDK                   |                |
| 6  |         | IPVYEEEEELPEPHVt <sub>s</sub> PTKSEFATTSTCMK                                                            | T112                 | 1     | 20  | 3695.648       | 0.014      | 3 | 3      | 38.8058  | 0.0083 |                 |                                         |                |
| 7  |         | TTKsEIEVEWR                                                                                             | S135                 | 1     | 8   | 1456.865       | 0.171      | 2 | 2      | 36.7233  | 0      | s[DE]xE         | CKII-like                               |                |
| 8  |         | SSSHQGS <sub>s</sub> SH <sub>s</sub> SQPSLFTTFTSLELFLR                                                  | S179                 | 1     | 4   | 3046.778       | -0.658     | 3 | 3      | 46.1419  | 0      | Sxx[st]         | CKI                                     |                |
| 9  |         | SGT <sub>s</sub> SVM <sub>s</sub> DLSSSR                                                                | S722                 | 1     | 12  | 1392.805       | 0.212      | 2 | 2      | 41.3826  | 0      | Sxx[st]         | CKI                                     | X <sup>b</sup> |
| 10 |         | SGT <sub>s</sub> SVM <sub>s</sub> DLSSSR                                                                | T721/S722/S723       | 2     | 2   | 1473.525       | 0.932      | 2 | 2      | 34.3478  | 0      | Sxx[st]         | CKI/FHA-1 pT binding motif              | X <sup>a</sup> |
| 11 |         | SGTSSVM <sub>s</sub> DL <sub>s</sub> SSREL <sub>s</sub> SNLNER                                          | S728/S729/S730       | 1     | 30  | 2349.248       | 1.183      | 3 | 3      | 73.322   | 0      |                 |                                         | X <sup>b</sup> |
| 12 |         | sGT <sub>s</sub> SVM <sub>s</sub> DL <sub>s</sub> S <sub>s</sub> REL <sub>s</sub> SNLNER                | S719/S722, S728/S730 | 2     | 8   | 2428.898       | -0.833     | 3 | 3      | 54.1979  | 0      |                 |                                         |                |
| 13 |         | SSSVHPSSVLT <sub>s</sub> YLALPLTL <sub>s</sub> DQV <sub>s</sub> KT <sub>s</sub> SVM <sub>s</sub> DLSSSR | S719, S722           | 2     | 2   | 4023.548       | 1.545      | 3 | 3      | 49.2489  | 0      |                 |                                         |                |
| 14 |         | NMGVSEs <sub>s</sub> DAKDSL <sub>s</sub> ER                                                             | S19                  | 1     | 3   | 1717.405       | 0.669      | 2 | 2      | 38.7696  | 0      |                 |                                         |                |
| 15 | Ucp6    | GLLFAEDNASFHRPFTDVSAHL <sub>s</sub> SSsLsK                                                              | S43/S44/S45/S46/S48  | 1     | 7   | 3200.438       | -0.9069    | 3 | 3      | 56.7936  | 0      | Sxx[st]         | CKI                                     |                |
| 16 |         | GLLFAEDNASFHRPFTDVSAHL <sub>s</sub> SSsLsK                                                              | S43/S44/S45/S46/S48  | 2     | 2   | 3279.458       | -0.073     | 3 | 3      | 43.9223  | 0      | Sxx[st]         | CKI                                     |                |
| 17 |         | PFTDVSAHLSSsLsK                                                                                         | S46                  | 1     | 4   | 1742.465       | 0.639      | 2 | 2,3    | 44.2873  | 0      | Sxx[st]         | CKI                                     |                |
| 18 |         | LVPIMs <sub>s</sub> tsIASSLPSyQDTFFLSPR                                                                 | S54/S55/T56/S57/Y65  | 1     | 19  | 3021.908       | 1.414      | 3 | 3      | 59.5881  | 0      | Sxx[st]         | CKI                                     |                |
| 19 |         | LVPIMs <sub>s</sub> tsIASSLPSyQDTFFLSPR                                                                 | S54/S55/T56/S57/Y65  | 2     | 5   | 3101.708       | -1.0938    | 3 | 3      | 36.9507  | 0      | Sxx[st]         | CKI                                     |                |
| 20 |         | NVsPSANHNEQWYLVR                                                                                        | S463                 | 1     | 3   | 1994.198       | 1.28       | 3 | 3      | 53.939   | 0      | sP              | proline-directed (WW-IV)                |                |
| 21 |         | NFIAEDNEYFDDEL <sub>s</sub> LAGIIHsPtVSTR                                                               | S555/T557            | 1     | 31  | 3031.928       | -0.45      | 3 | 2,3    | 54.6439  | 0      | sP              | proline-directed                        |                |
| 22 |         | NFIAEDNEYFDDEL <sub>s</sub> LAGIIHsPtVSTR                                                               | S555/T557, S559      | 2     | 4   | 3113.198       | 0.82       | 3 | 2,3    | 51.0956  | 0      | sP              | proline-directed                        |                |
| 23 |         | SRNsACEFPESMHVEHSG                                                                                      | S598                 | 1     | 45  | 2139.368       | -0.472     | 3 | 2,3    | 51.684   | 0      | Sxx[st]/s[DE]xE | CKI/CKII                                |                |
| 24 | Ubp3    | HVQGD <sub>s</sub> PVKK                                                                                 | S89                  | 1     | 2   | 1174.146       | 0.558      | 2 | 2      | 29.9021  | 0.004  | sPxK            | proline-directed (WW-IV)                |                |
| 25 |         | SGLDSFD <sub>s</sub> DQ <sub>s</sub> VEASGWTEVGK                                                        | S281/S282            | 1     | 3   | 2379.585       | -0.423     | 2 | 2      | 34.5079  | 0      |                 |                                         |                |
| 26 | Nxt3    | FLREDVEEEEE <sub>s</sub> PDAVEK                                                                         | S145                 | 1     | 9   | 2229.788       | 0.818      | 3 | 2,3    | 48.3523  | 0      | sP              | proline-directed (WW-IV)                |                |
| 27 |         | FLREDVEEEEE <sub>s</sub> PDAVEKEK                                                                       | S145                 | 1     | 2   | 2486.828       | 0.721      | 3 | 3      | 44.3425  | 0      | sP              | proline-directed (WW-IV)                |                |
| 28 |         | DVASEPYVNGVQ <sub>s</sub> QEHLPSAK                                                                      | S167                 | 1     | 6   | 2334.985       | -0.899     | 2 | 2      | 30.8829  | 0.008  |                 |                                         |                |
| 29 |         | KDVASEPYVNGVQ <sub>s</sub> QEHLPSAK                                                                     | S167                 | 1     | 5   | 2463.248       | 1.066      | 3 | 3      | 69.7662  | 0      |                 |                                         |                |
| 30 |         | SQASVSS <sub>s</sub> TAsTTGQT <sub>s</sub> VK                                                           | S285                 | 1     | 3   | 1719.445       | 0.639      | 2 | 2      | 61.0853  | 0      | Sxx[st]         | CKI                                     |                |
| 31 | Ubp4    | sPIAPLTEDQLSAR                                                                                          | S343                 | 1     | 5   | 1577.588       | 0.805      | 3 | 3      | 41.5432  | 0      | sP              | proline-directed                        | X <sup>a</sup> |
| 32 | Sfp47   | GVVLSVD <sub>s</sub> TVT <sub>s</sub> PISQSPK                                                           | S221                 | 1     | 17  | 1894.118       | 1.135      | 3 | 2,3    | 54.5591  | 0      | sP              | proline-directed                        |                |

| #  | Protein                                 | Sequence                             | Site(s)                  | # PO4 | TSC      | Precursor mass | Error (Da) | z     | Obs. z  | MM score | FDR                    | Motif                    | Kinase/binding motif                     | Refs.            |  |
|----|-----------------------------------------|--------------------------------------|--------------------------|-------|----------|----------------|------------|-------|---------|----------|------------------------|--------------------------|------------------------------------------|------------------|--|
| 33 | Sfp47                                   | KLtPtSPINSTLSFVDAK                   | T231, T233               | 2     | 2        | 2266.838       | 0.717      | 3     | 3       | 48.7993  | 0                      | tP/tPxxS                 | proline-directed (WW-IV)/SCF-FBW7 ligand |                  |  |
| 34 | Ubp5                                    | MVtGETLVDSQK                         | T3                       | 1     | 6        | 1387.266       | 0.622      | 2     | 2       | 29.7481  | 0                      |                          |                                          |                  |  |
| 35 |                                         | MVTGETLVDSQK                         | S10                      | 1     | 2        | 1387.165       | 0.521      | 2     | 2       | 39.2365  | 0                      | [st]xxx[ST]/[st]Q        | GSK3/PIKK                                |                  |  |
| 36 |                                         | MVTGETLVDSQKSLINNDTLLNEK             | S10                      | 1     | 15       | 2742.128       | 0.775      | 3     | 3       | 67.8174  | 0                      | [st]xxx[ST]/[st]Q        | GSK3/PIKK                                |                  |  |
| 37 |                                         | SLINNDtLLNEK                         | T19                      | 1     | 6        | 1453.766       | -0.146     | 2     | 2       | 44.0488  | 0                      |                          |                                          |                  |  |
| 38 |                                         | CFYNLQFMNEPVstTELTK                  | S274/T275                | 1     | 5        | 2401.725       | 0.662      | 2     | 2,3     | 39.0904  | 0                      | [st]xx[ILV]              | FHA-1 pT binding motif                   |                  |  |
| 39 |                                         | EALNPsIQLAELR                        | S554                     | 1     | 3        | 1533.485       | 0.691      | 2     | 2       | 46.4072  | 0                      |                          |                                          |                  |  |
| 40 |                                         | VEsPVNELNSTMEEVK                     | S648                     | 1     | 2        | 1900.525       | 0.669      | 2     | 2       | 38.0984  | 0                      | sP                       | proline-directed                         |                  |  |
| 41 |                                         | tFtQSELSTGDIICFPCRPSELEDDIVNSGFDSALK | T763/T765                | 1     | 4        | 4200.158       | 1.264      | 3     | 3       | 77.8765  | 0                      |                          |                                          |                  |  |
| 42 |                                         | NLPKENSsELDLNFQDDLDfENSISQK          | S136                     | 1     | 12       | 3218.078       | -0.385     | 3     | 3       | 77.5521  | 0                      | s[DE]xE                  | CKII-like                                |                  |  |
| 43 | ENSsELDLNFQDDLDfENSISQK                 | S136                                 | 1                        | 12    | 2766.765 | 0.577          | 2          | 2,3   | 65.4099 | 0        | s[DE]xE                | CKII-like                |                                          |                  |  |
| 44 | ENSELDLNFQDDLDfENSsISQKNEFSQK           | S152                                 | 1                        | 2     | 3500.498 | 0.97           | 3          | 3     | 46.5063 | 0        | [DE]x[ST]<br>[ILFWMVA] | Polo kinase              |                                          |                  |  |
| 45 | SPSVPLsPVSTFPASSISLDASSDVSAADVSVGGSSTIK | S169                                 | 1                        | 2     | 3786.638 | 0.791          | 3          | 3     | 40.86   | 0        | sP                     | proline-directed         |                                          |                  |  |
| 46 | LNLsPGAaiENQYR                          | S374                                 | 1                        | 3     | 1625.525 | 0.73           | 2          | 2     | 34.1734 | 0        | sP                     | proline-directed (WW-IV) |                                          |                  |  |
| 47 | SQPLVALNSEGsDFESK                       | S652/S653                            | 1                        | 8     | 1974.165 | 0.269          | 2          | 2     | 71.9983 | 0        | sxxFxK                 | BRCT-BRCA binding motif  |                                          |                  |  |
| 48 | SQPLVALNsEGsDFESK                       | S649, S652                           | 2                        | 4     | 2054.465 | 0.569          | 2          | 2     | 60.3211 | 0        | sxxFxK                 | BRCT-BRCA binding motif  |                                          |                  |  |
| 49 | SSDNTsLDGTPLQNTDFK                      | S664                                 | 1                        | 5     | 2018.745 | -0.136         | 2          | 2,3   | 40.3521 | 0        | Sxx[st]                | CKI                      |                                          |                  |  |
| 50 | SSDNTsLDGTPLQNTDFK                      | S664                                 | 1                        | 16    | 2148.458 | 1.482          | 3          | 2,3   | 44.2583 | 0        | Sxx[st]                | CKI                      |                                          |                  |  |
| 51 | Ftp105                                  | KVAtVEDDSPFDELdk                     | T680                     | 1     | 4        | 1886.825       | -0.027     | 2     | 2       | 50.7673  | 0                      | txxE                     | FHA-2 pT binding motif                   |                  |  |
| 52 |                                         | VAtVEDDSPFDELdkFSSPFSSSSSR           | T680                     | 1     | 5        | 2915.465       | -0.193     | 2     | 2,3     | 33.061   | 0                      | txxE                     | FHA-2 pT binding motif                   |                  |  |
| 53 |                                         | VATVEDDSPFDELdkFsPFSSSSSR            | S695                     | 1     | 1        | 2916.008       | 0.736      | 3     | 2       | 48.2794  | 0                      | sP                       | proline-directed                         |                  |  |
| 54 |                                         | VATVEDDSPFDELdkFsPFSSSSSR            | S694                     | 1     | 6        | 2915.706       | 0.434      | 2     | 2       | 33.4668  | 0                      |                          |                                          |                  |  |
| 55 |                                         | VATVEDDSPFDELdkFSSPFSSSSSR           | S698/S699/S700/S701/S702 | 1     | 10       | 2915.946       | 0.674      | 2     | 2       | 41.2093  | 0                      | Sxx[st]                  | CKI                                      |                  |  |
| 56 |                                         | NVslsVPTVLQDVFSDSLVLRSR              | S715/S717                | 1     | 16       | 2551.686       | 0.359      | 2     | 2       | 55.888   | 0                      |                          |                                          |                  |  |
| 57 |                                         | GKIPENVsssELIK                       | S746/S747/S748           | 1     | 13       | 1579.865       | 0.045      | 2     | 2       | 36.4596  | 0                      |                          |                                          |                  |  |
| 58 |                                         | GKIPENVsssELIKK                      | S746/S747/S748           | 1     | 1        | 1708.625       | 0.711      | 2     | 2       | 33.9483  | 0                      |                          |                                          |                  |  |
| 59 |                                         | IPENVsSSELIK                         | S746                     | 1     | 4        | 1394.985       | 0.282      | 2     | 2       | 31.7685  | 0                      |                          |                                          |                  |  |
| 60 |                                         | IPENVsSSELIKK                        | S746                     | 1     | 3        | 1523.325       | -0.527     | 2     | 2       | 29.7102  | 0.0054                 |                          |                                          |                  |  |
| 61 |                                         | VASPENSSsMENATK                      | S893                     | 1     | 4        | 1745.325       | 0.594      | 2     | 2,3     | 41.3906  | 0                      | Sxx[st]                  | CKI                                      |                  |  |
| 62 |                                         | Ubp6                                 | AIPELSDAVsQFNSSGGLVAEYR  | S129  | 1        | 6              | 2489.345   | 0.164 | 2       | 2,3      | 45.1165                | 0                        | [st]Q                                    | PIKK             |  |
| 63 |                                         |                                      | AIPELSDAVsQFNsSGGLVAEYR  | S133  | 1        | 2              | 2489.906   | 0.725 | 2       | 2        | 59.3718                | 0                        | [st]xxx[ST]                              | GSK3             |  |
| 64 |                                         |                                      | TLLNSMQSNAPVtPMR         | T143  | 1        | 25             | 1839.385   | 0.509 | 2       | 2,3      | 45.8935                | 0                        | tP                                       | proline-directed |  |
| 65 | IQPsEDEKEAEAECR                         |                                      | S359                     | 1     | 7        | 1870.365       | 0.594      | 2     | 2,3     | 32.5667  | 0                      | s[DE]xE                  | CKII-like                                |                  |  |

| #   | Protein            | Sequence                       | Site(s)        | # PO4 | TSC      | Precursor mass | Error (Da) | z      | Obs. z  | MM score | FDR     | Motif       | Kinase/binding motif                            | Refs.                    |
|-----|--------------------|--------------------------------|----------------|-------|----------|----------------|------------|--------|---------|----------|---------|-------------|-------------------------------------------------|--------------------------|
| 66  | Ubp7               | sLQLsPCLTDDEQLSK               | S333, S337     | 2     | 20       | 1993.165       | 0.29       | 2      | 2       | 47.197   | 0       | sP          | proline-directed (WW-IV)                        | X <sup>a</sup>           |
| 67  |                    | sLQLsPCLTDDEQLSK               | S333           | 1     | 1        | 1913.285       | 0.41       | 2      | 2       | 45.2128  | 0       | [st]xxx[ST] | GSK3                                            |                          |
| 68  |                    | SLQLsPCLiDDEQLSK               | S337, T341     | 1     | 7        | 1993.405       | 0.53       | 2      | 2       | 47.5859  | 0       | sP          | proline-directed (WW-IV)                        | X <sup>ab</sup>          |
| 69  |                    | SLQLsPCLTDDEQLSK               | S337           | 1     | 94       | 1913.185       | 0.31       | 2      | 2       | 38.948   | 0       | sP          | proline-directed (WW-IV)                        |                          |
| 70  |                    | SLQLsPCLiDDEQLSK               | T341           | 1     | 9        | 1913.465       | 0.59       | 2      | 2       | 56.5592  | 0       |             |                                                 |                          |
| 71  |                    | ELsQSSDSSQHqHDSFLPANsPLAASSTK  | S420           | 1     | 17       | 3223.268       | 0.824      | 3      | 2,3     | 61.5852  | 0       | sP          | proline-directed (WW-IV)                        | X <sup>b</sup>           |
| 72  |                    | ELsQSSDssQHqHDSFLPANSSPLAASSTK | S401/S406/S407 | 2     | 2        | 3303.278       | 0.834      | 3      | 2,3     | 31.5933  | 0.0064  | Sxx[st]     | CKI                                             |                          |
| 73  |                    | SLPSSELLDSsDKGQQVFK            | S439/S440      | 1     | 21       | 2231.545       | 0.475      | 2      | 2       | 50.8316  | 0.002   |             |                                                 |                          |
| 74  |                    | RsLDILR                        | S493           | 1     | 2        | 951.585        | 0.061      | 2      | 2       | 35.3742  | 0       |             |                                                 | X <sup>a</sup>           |
| 75  |                    | LGELsSDDMMLDK                  | S503           | 1     | 3        | 1533.125       | 0.477      | 2      | 2       | 36.4709  | 0       |             |                                                 |                          |
| 76  |                    | RLsDLsVNSSGQISK                | S648, S651     | 2     | 1        | 1750.125       | 0.288      | 2      | 2       | 32.8255  | 0       | Sxx[st]     | CKI                                             |                          |
| 77  |                    | RLsDLSVNssSGQISK               | S648, S654     | 2     | 10       | 1750.266       | 0.429      | 2      | 2       | 41.5824  | 0       | Sxx[st]     | CKI                                             |                          |
| 78  |                    | RLsDLSVNSSGQISK                | S648           | 1     | 11       | 1670.565       | 0.728      | 2      | 2       | 39.4339  | 0       |             |                                                 |                          |
| 79  |                    | RLSDLSVNssSGQISK               | S654           | 1     | 2        | 1670.465       | 0.628      | 2      | 2       | 40.8827  | 0       | Sxx[st]     | CKI                                             |                          |
| 80  |                    | LSDLSVNssSGQISK                | S654           | 1     | 2        | 1514.445       | 0.709      | 2      | 2       | 36.7344  | 0       | Sxx[st]     | CKI                                             |                          |
| 81  | GGLTSDNDKysFNNSVYR | Y722/S723                      | 1              | 3     | 2116.446 | 0.522          | 2          | 2      | 47.5216 | 0        |         |             |                                                 |                          |
| 82  | Ubp9               | WMGMNsPGSTDR                   | S11            | 1     | 47       | 1417.745       | 0.196      | 2      | 2       | 38.3581  | 0.0038  | sP          | proline-directed                                | X <sup>a</sup>           |
| 83  |                    | KSsLYGSNGINSCGCVDISNVGSESGTK   | S110           | 1     | 12       | 2956.598       | 0.321      | 3      | 3       | 65.5451  | 0       |             |                                                 |                          |
| 84  |                    | ESIKPMSIPsQLKQESVEVSNLSStPR    | T462           | 1     | 3        | 3067.178       | 0.645      | 3      | 3       | 42.9948  | 0       | tP          | proline-directed                                |                          |
| 85  |                    | QESVEVSNLSStPR                 | T462           | 1     | 12       | 1611.725       | -0.023     | 2      | 2,3     | 46.2688  | 0       | tP          | proline-directed                                |                          |
| 86  |                    | SYFDREPsLDAER                  | S505           | 1     | 5        | 1664.168       | 0.446      | 3      | 3       | 44.0801  | 0       | [KR]xxs     | PKA/PKC                                         | X <sup>a</sup>           |
| 87  |                    | SKFFGSSQSNsPK                  | S550           | 1     | 6        | 1479.965       | 0.292      | 2      | 2       | 40.5044  | 0       | sPK         | Histone H1 kinase                               |                          |
| 88  |                    | FFGSSQSNsPK                    | S550           | 1     | 9        | 1264.485       | -0.061     | 2      | 2       | 32.9137  | 0.0021  | sPK         | Histone H1 kinase                               | X <sup>a</sup>           |
| 89  |                    | FFGSSQSNsPKDsPLR               | S550           | 1     | 2        | 1833.345       | 0.502      | 2      | 2       | 34.5135  | 0.0013  | sPK         | Histone H1 kinase                               | X <sup>a</sup>           |
| 90  |                    | FFGSSQsNsPKDsPLR               | S548, S550     | 2     | 2        | 1913.618       | 0.775      | 3      | 2,3     | 41.3943  | 0       | Sxx[st]/sPK | CKI/Histone H1 kinase                           |                          |
| 91  |                    | FFGSSQsNSPKDsPLRDTHK           | S548, S554     | 2     | 1        | 2394.998       | 0.926      | 3      | 3       | 39.1385  | 0       | Sxx[st]/sP  | CKI/proline-directed                            |                          |
| 92  |                    | FFGSSQSNsPKDsPLRDTHK           | S550, S554     | 2     | 1        | 2394.278       | 0.206      | 3      | 3       | 46.4129  | 0       | sPK, sP     | Histone H1 kinase/proline-directed              |                          |
| 93  |                    | Bun107                         | KGNVNMPSALsPLR | S568  | 1        | 9              | 1562.805   | -0.008 | 2       | 2        | 35.5641 | 0           | sP                                              | proline-directed (WW-IV) |
| 94  | GNVNMPSALsPLR      |                                | S568           | 1     | 45       | 1434.525       | -0.178     | 2      | 2       | 53.2642  | 0       | sP          | proline-directed (WW-IV)                        |                          |
| 95  | NRKPHTEVVGSPTVVR   |                                | S655           | 1     | 3        | 1855.598       | 0.618      | 3      | 2,3     | 41.7664  | 0       | sP          | proline-directed                                | X <sup>a</sup>           |
| 96  | KPHTEVVGSPTVVR     |                                | S655           | 1     | 2        | 1585.105       | 0.269      | 2      | 2       | 33.6854  | 0.0028  | sP          | proline-directed                                |                          |
| 97  | VFstGTsvTSPQALS    |                                | S710           | 1     | 15       | 1688.885       | 0.049      | 2      | 2       | 35.5883  | 0       |             |                                                 |                          |
| 98  | VFTGTsvTSPQALS     |                                | S717           | 1     | 73       | 1688.805       | 0.03       | 2      | 2       | 34.6703  | 0       | sP          | proline-directed                                | X <sup>a</sup>           |
| 99  | SKsSKsLQTDFMK      |                                | S790, S793     | 2     | 8        | 1645.945       | 0.195      | 2      | 2       | 35.4553  | 0       |             |                                                 |                          |
| 100 | SSKsLQTDFMK        |                                | S793           | 1     | 1        | 1366.845       | 16.222     | 2      | 2       | 29.5159  | 0       | Sxx[st]     | CKI                                             |                          |
| 101 | SVsEIVDKTQSLNI     |                                | S951           | 1     | 3        | 1612.266       | 0.457      | 2      | 2       | 36.9104  | 0       |             |                                                 |                          |
| 102 | SVSEIVDKTQsLNI     |                                | S959           | 1     | 1        | 1611.766       | -0.043     | 2      | 2       | 36.955   | 0       | [KR]xxs     | PKA/PKC                                         |                          |
| 103 | Bun62              | StPQITGSLPDNTPVK               | T37            | 1     | 1        | 1831.305       | 0.395      | 2      | 2       | 30.965   | 0.0055  | tP          | proline-directed (WW-IV)/FHA-1 pT binding motif |                          |

| #   | Protein           | Sequence                             | Site(s)                      | # PO4 | TSC      | Precursor mass | Error (Da) | z | Obs. z  | MM score | FDR     | Motif                        | Kinase/binding motif                    | Refs.           |
|-----|-------------------|--------------------------------------|------------------------------|-------|----------|----------------|------------|---|---------|----------|---------|------------------------------|-----------------------------------------|-----------------|
| 104 | Bun62             | STPQITGsPLDPNTPVK                    | S43                          | 1     | 16       | 1831.725       | 0.815      | 2 | 2       | 30.3142  | 0.0088  | sP                           | proline-directed (WW-IV)                |                 |
| 105 |                   | SHNFSSSNtPYLK                        | T116                         | 1     | 3        | 1560.425       | -0.27      | 2 | 2       | 44.3447  | 0       | tP                           | proline-directed/FHA-1 pT binding motif |                 |
| 106 | Ubp12             | sLsEEsQssNMDDISQK                    | S19/S21/<br>S24/S26/ S27     | 2     | 6        | 2132.078       | 1.24       | 3 | 3       | 49.0096  | 0       | Sxx[st]/ sxxE                | CKI/CKII-like                           |                 |
| 107 |                   | sLSEESQSSSNMDDISQK                   | S19                          | 1     | 5        | 2052.278       | 1.44       | 3 | 3       | 66.8216  | 0       | s[DE]xE                      | CKII-like                               | X <sup>a</sup>  |
| 108 |                   | SLSEESQSSSNMDDISQKsISLGDASEISK       | S37                          | 1     | 11       | 3239.888       | 1.447      | 3 | 3       | 41.6835  | 0       | Sxx[st]                      | CKI                                     |                 |
| 109 |                   | sISLGDASEISK                         | S37                          | 1     | 17       | 1285.225       | -0.389     | 2 | 2       | 31.2884  | 0       | Sxx[st]                      | CKI                                     | X <sup>ab</sup> |
| 110 |                   | SISLGDASEISK                         | S39                          | 1     | 9        | 1285.805       | 0.191      | 2 | 2       | 33.6944  | 0       | [KR]xxs                      | PKA/PKC                                 | X <sup>a</sup>  |
| 111 |                   | IPTGWNMsVSNLPLLTER                   | S708                         | 1     | 5        | 2106.946       | -0.105     | 2 | 2       | 51.2939  | 0       |                              |                                         |                 |
| 112 |                   | DLEsTVDPDLDAHsIEEEDDSEFK             | S725                         | 1     | 13       | 2699.565       | 0.43       | 2 | 2       | 38.4617  | 0       |                              |                                         | X <sup>b</sup>  |
| 113 |                   | DLESTVDPLDAHsIEEEDDSEFK              | S734                         | 1     | 21       | 2699.646       | 0.511      | 2 | 2       | 62.3641  | 0       |                              |                                         |                 |
| 114 |                   | DLEstVDPLDAHsIEEEDDSEFK              | S725/T726,<br>S734           | 2     | 5        | 2779.666       | 0.531      | 2 | 2       | 46.6045  | 0       |                              |                                         |                 |
| 115 |                   | DLEsTVDPDLDAHsIEEEDDSEFKDVAPGSYPEPSK | S725                         | 1     | 14       | 3927.848       | 1.136      | 3 | 3       | 63.3675  | 0       |                              |                                         |                 |
| 116 |                   | DLESTVDPLDAHsIEEEDDSEFKDVAPGSYPEPSK  | S734                         | 1     | 23       | 3926.378       | -0.334     | 3 | 3       | 51.9836  | 0       |                              |                                         |                 |
| 117 | TILSDKKDdsEDSR    | S819                                 | 1                            | 4     | 1688.365 | 0.601          | 2          | 2 | 38.7734 | 0        | [KR]xxs | PKA/PKC                      | X <sup>b</sup>                          |                 |
| 118 | Ubp14             | YssFSSQGLTLTVPR                      | S453/S454                    | 1     | 19       | 1722.465       | 0.629      | 2 | 2       | 33.4542  | 0       | Sxx[st]/Rx[st]/<br>RxRxx[st] | CKI/PKA/PKB                             |                 |
| 119 | Ubp15             | IPTDNDSDSRsVAYALQR                   | S271                         | 1     | 2        | 2115.625       | 0.664      | 2 | 2,3     | 42.1824  | 0       | Sxx[st]                      | CKI                                     |                 |
| 120 |                   | LDHILsPVTAEDVPFHVR                   | S553                         | 1     | 3        | 2124.646       | 0.572      | 2 | 2,3     | 31.7945  | 0.006   | sP                           | proline-directed (WW-IV)                |                 |
| 121 |                   | YHGFDMtDFSASDDDPVLITTK               | T608                         | 1     | 13       | 2555.078       | 0.983      | 3 | 2,3     | 49.5536  | 0       |                              |                                         |                 |
| 122 | Sst2              | SSSDLPQFDYPsLNssPtfNsNLPISRR         | S186/S189/S1<br>90/T192/S195 | 1     | 7        | 3225.128       | 1.66       | 3 | 2,3     | 32.883   | 0       |                              |                                         |                 |
| 123 |                   | FEKtsLSDSK                           | S208                         | 1     | 2        | 1221.125       | 0.559      | 2 | 2       | 33.4746  | 0       |                              |                                         |                 |
| 124 | LVsPEPLDDNKDIQFIK | S216                                 | 1                            | 3     | 2050.605 | 0.569          | 2          | 2 | 35.0474 | 0.002    | sP      | proline-directed             |                                         |                 |
| 125 | Rpn11             | VQNEVTLSPEQLR                        | S265                         | 1     | 7        | 1592.525       | 0.731      | 2 | 2,3     | 49.0355  | 0       | sP                           | proline-directed                        | X <sup>ab</sup> |
| 126 | Rpn1              | DISSKsPSGNDALNDK                     | S10                          | 1     | 8        | 1727.405       | 0.63       | 2 | 2       | 41.2491  | 0       | sP                           | proline-directed                        | X <sup>a</sup>  |
| 127 |                   | DISSKsPSGNDALNDKk                    | S10                          | 1     | 6        | 1855.628       | 0.758      | 3 | 2,3     | 40.3369  | 0.004   | sP                           | proline-directed                        | X <sup>a</sup>  |
| 128 |                   | DISSKsPSGNDALNDKkGTK                 | S10                          | 1     | 2        | 2141.978       | 0.944      | 3 | 3       | 51.0394  | 0       | sP                           | proline-directed                        |                 |
| 129 | Rpn2              | TTEEKEAtPMEMDEEK                     | T856                         | 1     | 3        | 1977.305       | 0.508      | 2 | 3       | 45.0112  | 0       | tP                           | proline-directed                        |                 |
| 130 |                   | DAVPASADTEPGEQEAsPPEDFEYPFDDDD       | S952                         | 1     | 3        | 3335.258       | 0.973      | 3 | 3       | 54.8409  | 0       | sP                           | proline-directed                        |                 |
| 131 | Rpn1301           | DQLLDPARsDVATVSDMMVEVDTVQEPIAQPTSSK  | S122                         | 1     | 4        | 4213.988       | 1.094      | 3 | 3       | 60.2375  | 0       |                              |                                         |                 |

Key:

TSC = total spectral counts

#PO4 = number of phosphate groups

MM score = Myrimatch Score

z = charge of specific spectrum

Obs. z = observed charge states for modified sequence

FDR = false discovery rate for sequence

Refs. = site identified in previous study as indicated

Kinase/binding motif as defined by ELM (<http://elm.eu.org/links.html>)

Footnotes:

a = Wilson-Grady et al.(2008) J Proteome Res, 7 (3), 1088-97.

b = Beltrao et al. (2009) PLoS Biol, 7 (6), e1000134.

Supplemental Figure 1. Representative spectra and observed fragment ion tables for all modified peptides listed in Supplemental Table II.

**Table of contents**

| Pg. | Protein | scan  | Sequence                              | Site(s)              | # PO4 | z | Precursor mass | error (Da) |
|-----|---------|-------|---------------------------------------|----------------------|-------|---|----------------|------------|
| 4   | Ubp2    | 14301 | LIQDLDFVFDsPSAGWNDPWPSPHSSR           | S25                  | 1     | 3 | 2904.998       | -0.306     |
| 6   | Ubp2    | 14450 | LIQDLDFVFDSPSAGWNDPWsPHSSR            | S35                  | 1     | 3 | 2906.078       | 0.774      |
| 8   | Ubp2    | 11504 | DRIPVYEEEEELPEPHVtSPTK                | T112/S113            | 1     | 2 | 2707.345       | 0.069      |
| 10  | Ubp2    | 11634 | IPVYEEEEELPEPHVTsPTK                  | S113                 | 1     | 3 | 2436.338       | 0.191      |
| 12  | Ubp2    | 14706 | IPVYEEEEELPEPHVTsPTKSEFATTSTCMK       | S113                 | 1     | 3 | 3680.258       | 0.597      |
| 14  | Ubp2    | 11490 | IPVYEEEEELPEPHVtSPTKSEFATTSTCMK       | T112                 | 1     | 3 | 3695.648       | 0.014      |
| 16  | Ubp2    | 9205  | TTKsEIEVEWR                           | S135                 | 1     | 2 | 1456.865       | 0.171      |
| 18  | Ubp2    | 15897 | SSSHQGSsHsSQPSLFTTFTSLELFLR           | S179                 | 1     | 3 | 3046.778       | -0.658     |
| 20  | Ubp2    | 6965  | SGTsSVMDLSSSR                         | S722                 | 1     | 2 | 1392.805       | 0.212      |
| 22  | Ubp2    | 11165 | SGTssVMDLSSSR                         | T721/S722/S723       | 2     | 2 | 1473.525       | 0.932      |
| 24  | Ubp2    | 13327 | SGTSSVMDLsssRELSNLNER                 | S728/S729/S730       | 1     | 3 | 2349.248       | 1.183      |
| 26  | Ubp2    | 11008 | sGTsSVMDLsSsRELSNLNER                 | S719/S722, S728/S730 | 2     | 3 | 2428.898       | -0.833     |
| 28  | Ubp2    | 16537 | SSSVHPSSLVTLALIPLTLDQVKsGTsSVMDLSSSR  | S719, S722           | 2     | 3 | 4023.548       | 1.545      |
| 30  | Ucp6    | 11495 | NMGVSEsDAKDSLER                       | S19                  | 1     | 2 | 1717.405       | 0.669      |
| 32  | Ucp6    | 12648 | GLLFAEDNASFHRPFTDVAHLsssLsK           | S43/S44/S45/S46/S48  | 1     | 3 | 3200.438       | -0.9069    |
| 34  | Ucp6    | 13030 | GLLFAEDNASFHRPFTDVAHLsssLsK           | S43/S44/S45/S46/S48  | 2     | 3 | 3279.458       | -0.073     |
| 36  | Ucp6    | 9550  | PFTDVAHLSSSsLSK                       | S46                  | 1     | 2 | 1742.465       | 0.639      |
| 38  | Ucp6    | 12    | LVPIMsstsiASSLPSyQDTFFLPSPR           | S54/S55/T56/S57/Y65  | 1     | 3 | 3021.908       | 1.414      |
| 40  | Ucp6    | 144   | LVPIMsstsiASSLPSyQDTFFLPSPR           | S54/S55/T56/S57/Y65  | 2     | 3 | 3101.708       | -1.0938    |
| 42  | Ucp6    | 12968 | NVsPSANHNEQWYLVR                      | S463                 | 1     | 3 | 1994.198       | 1.28       |
| 44  | Ucp6    | 14229 | NFIAEDNEYFDDELAGIIHsPtVSTR            | S555/T557            | 1     | 3 | 3031.928       | -0.45      |
| 46  | Ucp6    | 15558 | NFIAEDNEYFDDELAGIIHsPtVsTR            | S555/T557, S559      | 2     | 3 | 3113.198       | 0.82       |
| 48  | Ucp6    | 8349  | SRNsACEFPESMHVEHSG                    | S598                 | 1     | 3 | 2139.368       | -0.472     |
| 50  | Ubp3    | 2522  | HVQGDsPVKK                            | S89                  | 1     | 2 | 1174.146       | 0.558      |
| 52  | Ubp3    | 11316 | SGLDSFDDQsVEASGWTEVGK                 | S281/S282            | 1     | 2 | 2379.585       | -0.423     |
| 54  | Nxt3    | 8060  | FLREDVEEEEEsPDAVEK                    | S145                 | 1     | 3 | 2229.788       | 0.818      |
| 56  | Nxt3    | 8395  | FLREDVEEEEEsPDAVEKEK                  | S145                 | 1     | 3 | 2486.828       | 0.721      |
| 58  | Nxt3    | 8646  | DVASEPYVNGVQsQEHLPSAK                 | S167                 | 1     | 2 | 2334.985       | -0.899     |
| 60  | Nxt3    | 8362  | KDVASEPYVNGVQsQEHLPSAK                | S167                 | 1     | 3 | 2463.248       | 1.066      |
| 62  | Nxt3    | 3220  | SQASVSSTAsTTGQTVK                     | S285                 | 1     | 2 | 1719.445       | 0.639      |
| 64  | Ubp4    | 8347  | sPIAPLTEDQLSAR                        | S343                 | 1     | 3 | 1577.588       | 0.805      |
| 66  | Sfp47   | 9339  | GVVLSVDVTsPISQSPK                     | S221                 | 1     | 3 | 1894.118       | 1.135      |
| 68  | Sfp47   | 8724  | KLtPtTSPINSTSLSFVDAK                  | T231, T233           | 2     | 3 | 2266.838       | 0.717      |
| 70  | Ubp5    | 8753  | MVtGETLVDSQK                          | T3                   | 1     | 2 | 1387.266       | 0.622      |
| 72  | Ubp5    | 6153  | MVTGETLVDSQK                          | S10                  | 1     | 2 | 1387.165       | 0.521      |
| 74  | Ubp5    | 13287 | MVTGETLVDSQKSLINNDLLNEK               | S10                  | 1     | 3 | 2742.128       | 0.775      |
| 76  | Ubp5    | 10353 | SLINNDLLNEK                           | T19                  | 1     | 2 | 1453.766       | -0.146     |
| 78  | Ubp5    | 12713 | CFYNLQFMNEPVsTELTK                    | S274/T275            | 1     | 2 | 2401.725       | 0.662      |
| 80  | Ubp5    | 11314 | EALNPsiQLAELR                         | S554                 | 1     | 2 | 1533.485       | 0.691      |
| 82  | Ubp5    | 9618  | VEsPVNELNSTMEEVK                      | S648                 | 1     | 2 | 1900.525       | 0.669      |
| 84  | Ubp5    | 15470 | tFtQSELSTGDIICFEPcRPSALEDDIVNSGFDSALK | T763/T765            | 1     | 3 | 4200.158       | 1.264      |
| 86  | Ftp105  | 14082 | NLPKENSeldLSNFQDDLDfENSISQK           | S136                 | 1     | 3 | 3218.078       | -0.385     |
| 88  | Ftp105  | 12742 | ENsELDLsNFQDDLDfENSISQK               | S136                 | 1     | 2 | 2766.765       | 0.577      |
| 90  | Ftp105  | 14157 | ENSELDLSNFQDDLDfENsISQKNEFSQK         | S152                 | 1     | 3 | 3500.498       | 0.97       |

| Pg. | Protein | scan  | Sequence                                | Site(s)                  | # PO4 | z | Precursor mass | error (Da) |
|-----|---------|-------|-----------------------------------------|--------------------------|-------|---|----------------|------------|
| 92  | Ftp105  | 13460 | SPSVPLsPVSTFPASSISLDASSDVSAAADVSGGSSTIK | S169                     | 1     | 3 | 3786.638       | 0.791      |
| 94  | Ftp105  | 10677 | LNLsPGAAIENQYR                          | S374                     | 1     | 2 | 1625.525       | 0.73       |
| 96  | Ftp105  | 10334 | SQPLVALNSEGsDFESK                       | S652/S653                | 1     | 2 | 1974.165       | 0.269      |
| 98  | Ftp105  | 11213 | SQPLVALNSEGsSDFESK                      | S649, S652               | 2     | 2 | 2054.465       | 0.569      |
| 100 | Ftp105  | 10086 | SSDNTsLDGTPLQNTDFK                      | S664                     | 1     | 2 | 2018.745       | -0.136     |
| 102 | Ftp105  | 9489  | SSDNTsLDGTPLQNTDFKK                     | S664                     | 1     | 3 | 2148.458       | 1.482      |
| 104 | Ftp105  | 11826 | KVAIVEDDSPFDELDK                        | T680                     | 1     | 2 | 1886.825       | -0.027     |
| 106 | Ftp105  | 14537 | VAVVEDDSPFDELDFSSPFSSSSSR               | T680                     | 1     | 2 | 2915.465       | -0.193     |
| 108 | Ftp105  | 11486 | VATVEDDSPFDELDFsPFSSSSSR                | S695                     | 1     | 3 | 2916.008       | 0.736      |
| 110 | Ftp105  | 11504 | VATVEDDSPFDELDFsSPFSSSSSR               | S694                     | 1     | 2 | 2915.706       | 0.434      |
| 112 | Ftp105  | 14599 | VATVEDDSPFDELDFSSPFSSSSsR               | S698/S699/S700/S701/S702 | 1     | 2 | 2915.946       | 0.674      |
| 114 | Ftp105  | 13304 | NVsisVPTVLQDVFSDSLPLLSR                 | S715/S717                | 1     | 2 | 2551.686       | 0.359      |
| 116 | Ftp105  | 10650 | GKIPENVsssELIK                          | S746/S747/S748           | 1     | 2 | 1579.865       | 0.045      |
| 118 | Ftp105  | 8203  | GKIPENVsssELIKK                         | S746/S747/S748           | 1     | 2 | 1708.625       | 0.711      |
| 120 | Ftp105  | 9744  | IPENVsSSELIK                            | S746                     | 1     | 2 | 1394.985       | 0.282      |
| 122 | Ftp105  | 10572 | IPENVsSSELIKK                           | S746                     | 1     | 2 | 1523.325       | -0.527     |
| 124 | Ftp105  | 7173  | VASPENSSNsMENATK                        | S893                     | 1     | 2 | 1745.325       | 0.594      |
| 126 | Ubp6    | 18272 | AIPELSDAVsQFNSSGGLVAEYR                 | S129                     | 1     | 2 | 2489.345       | 0.164      |
| 128 | Ubp6    | 18122 | AIPELSDAVsQFNsSGGLVAEYR                 | S133                     | 1     | 2 | 2489.906       | 0.725      |
| 130 | Ubp6    | 15569 | TLLNSMQSNAPVtPMR                        | T143                     | 1     | 2 | 1839.385       | 0.509      |
| 132 | Ubp6    | 9647  | IQPsEDEKEAEAEQR                         | S359                     | 1     | 2 | 1870.365       | 0.594      |
| 134 | Ubp7    | 9895  | sLQLsPCLTDDEQLSK                        | S333, S337               | 2     | 2 | 1993.165       | 0.29       |
| 136 | Ubp7    | 13954 | sLQLSPCLTDDEQLSK                        | S333                     | 1     | 2 | 1913.285       | 0.41       |
| 138 | Ubp7    | 9756  | SLQLsPCLTDDEQLSK                        | S337, T341               | 1     | 2 | 1993.405       | 0.53       |
| 140 | Ubp7    | 9297  | SLQLsPCLTDDEQLSK                        | S337                     | 1     | 2 | 1913.185       | 0.31       |
| 142 | Ubp7    | 11468 | SLQLSPCLTDDEQLSK                        | T341                     | 1     | 2 | 1913.465       | 0.59       |
| 144 | Ubp7    | 10411 | ELSQQSSDSSQHQHDSFLPANsSPLAASSTK         | S420                     | 1     | 3 | 3223.268       | 0.824      |
| 146 | Ubp7    | 10959 | ELsQQSSDssQHQHDSFLPANSSPLAASSTK         | S401/S406/S407           | 2     | 3 | 3303.278       | 0.834      |
| 148 | Ubp7    | 11416 | SLPSELLDsSsDKGQQVFK                     | S439/S440                | 1     | 2 | 2231.545       | 0.475      |
| 150 | Ubp7    | 10013 | RsLDILR                                 | S493                     | 1     | 2 | 951.585        | 0.061      |
| 152 | Ubp7    | 13453 | LGELsSDDMMLDK                           | S503                     | 1     | 2 | 1533.125       | 0.477      |
| 154 | Ubp7    | 9744  | RLsDLsVNSSGQISK                         | S648, S651               | 2     | 2 | 1750.125       | 0.288      |
| 156 | Ubp7    | 9559  | RLsDLSVNsSGQISK                         | S648, S654               | 2     | 2 | 1750.266       | 0.429      |
| 158 | Ubp7    | 9682  | RLsDLSVNSSGQISK                         | S648                     | 1     | 2 | 1670.565       | 0.728      |
| 160 | Ubp7    | 9446  | RLSDLSVNsSGQISK                         | S654                     | 1     | 2 | 1670.465       | 0.628      |
| 162 | Ubp7    | 8324  | LSDLSVNsSGQISK                          | S654                     | 1     | 2 | 1514.445       | 0.709      |
| 164 | Ubp7    | 10401 | GGLTSDNDKysFNNSVYR                      | Y722/S723                | 1     | 2 | 2116.446       | 0.522      |
| 166 | Ubp9    | 8693  | WMGMNsPGSTDR                            | S11                      | 1     | 2 | 1417.745       | 0.196      |
| 168 | Ubp9    | 9436  | KSsLYGSNGINSCGCVDISNVGSESGTK            | S110                     | 1     | 3 | 2956.598       | 0.321      |
| 170 | Ubp9    | 10550 | ESIKPMSIPSQLKQESVEVSNLSSiPR             | T462                     | 1     | 3 | 3067.178       | 0.645      |
| 172 | Ubp9    | 6870  | QESVEVSNLSSiPR                          | T462                     | 1     | 2 | 1611.725       | -0.023     |
| 174 | Ubp9    | 8715  | SYFDREPsLDAER                           | S505                     | 1     | 3 | 1664.168       | 0.446      |
| 176 | Ubp9    | 6458  | SKFFGSSQSNsPK                           | S550                     | 1     | 2 | 1479.965       | 0.292      |
| 178 | Ubp9    | 5945  | FFGSSQSNsPK                             | S550                     | 1     | 2 | 1264.485       | -0.061     |
| 180 | Ubp9    | 9537  | FFGSSQSNsPKDSPLR                        | S550                     | 1     | 2 | 1833.345       | 0.502      |
| 182 | Ubp9    | 8728  | FFGSSQsNsPKDSPLR                        | S548, S550               | 2     | 3 | 1913.618       | 0.775      |
| 184 | Ubp9    | 7018  | FFGSSQsNSPKDsPLRDTHK                    | S548, S554               | 2     | 3 | 2394.998       | 0.926      |

| Pg. | Protein | scan  | Sequence                              | Site(s)                  | # PO4 | z | Precursor mass | error (Da) |
|-----|---------|-------|---------------------------------------|--------------------------|-------|---|----------------|------------|
| 186 | Ubp9    | 7026  | FFGSSQSNsPKDsPLRDTHK                  | S550, S554               | 2     | 3 | 2394.278       | 0.206      |
| 188 | Bun107  | 8263  | KGNVNMPSALsPLR                        | S568                     | 1     | 2 | 1562.805       | -0.008     |
| 190 | Bun107  | 9800  | GNVNMPSALsPLR                         | S568                     | 1     | 2 | 1434.525       | -0.178     |
| 192 | Bun107  | 5875  | NRKPHTEVVGsPTVVR                      | S655                     | 1     | 3 | 1855.598       | 0.618      |
| 194 | Bun107  | 5792  | KPHTEVVGsPTVVR                        | S655                     | 1     | 2 | 1585.105       | 0.269      |
| 196 | Bun107  | 8955  | VFstGTGTSVTSPQALSK                    | S710                     | 1     | 2 | 1688.885       | 0.049      |
| 198 | Bun107  | 7794  | VFSTGTSTSPQALSK                       | S717                     | 1     | 2 | 1688.805       | 0.03       |
| 200 | Bun107  | 8179  | SKsSKsLQTDfMK                         | S790, S793               | 2     | 2 | 1645.945       | 0.195      |
| 202 | Bun107  | 6707  | SSKsLQTDfMK                           | S793                     | 1     | 2 | 1366.845       | 16.222     |
| 204 | Bun107  | 10200 | SVsEIVDKTQSLNI                        | S951                     | 1     | 2 | 1612.266       | 0.457      |
| 206 | Bun107  | 10317 | SVSEIVDKTQsLNI                        | S959                     | 1     | 2 | 1611.766       | -0.043     |
| 208 | Bun62   | 7201  | StPQITGSPLDPNTPVK                     | T37                      | 1     | 2 | 1831.305       | 0.395      |
| 210 | Bun62   | 8756  | STPQITGSPLDPNTPVK                     | S43                      | 1     | 2 | 1831.725       | 0.815      |
| 212 | Bun62   | 8479  | SHNFSSSNtPYLK                         | T116                     | 1     | 2 | 1560.425       | -0.27      |
| 214 | Ubp12   | 7983  | sLsEEsQsSNMDDISQK                     | S19/S21/S24/S26/S27      | 2     | 3 | 2132.078       | 1.24       |
| 216 | Ubp12   | 8058  | sLSEESQSSSNMDDISQK                    | S19                      | 1     | 3 | 2052.278       | 1.44       |
| 218 | Ubp12   | 10767 | SLSEESQSSSNMDDISQKsISLGDASEISK        | S37                      | 1     | 3 | 3239.888       | 1.447      |
| 220 | Ubp12   | 8042  | siSLGDASEISK                          | S37                      | 1     | 2 | 1285.225       | -0.389     |
| 222 | Ubp12   | 10668 | SisLGDASEISK                          | S39                      | 1     | 2 | 1285.805       | 0.191      |
| 224 | Ubp12   | 15034 | IPTGWNMsVSNLPLLTER                    | S708                     | 1     | 2 | 2106.946       | -0.105     |
| 226 | Ubp12   | 12562 | DLEsTVDPLDAHSIEEEDDSEFK               | S725                     | 1     | 2 | 2699.565       | 0.43       |
| 228 | Ubp12   | 13832 | DLESTVDPLDAHsIEEEDDSEFK               | S734                     | 1     | 2 | 2699.646       | 0.511      |
| 230 | Ubp12   | 11741 | DLEstVDPLDAHsIEEEDDSEFK               | S725/T726, S734          | 2     | 2 | 2779.666       | 0.531      |
| 232 | Ubp12   | 10728 | DLEsTVDPLDAHSIEEEDDSEFKDVAPGSYPEPSK   | S725                     | 1     | 3 | 3927.848       | 1.136      |
| 234 | Ubp12   | 13475 | DLESTVDPLDAHsIEEEDDSEFKDVAPGSYPEPSK   | S734                     | 1     | 3 | 3926.378       | -0.334     |
| 236 | Ubp12   | 8308  | TILSDKKDdsEDSR                        | S819                     | 1     | 2 | 1688.365       | 0.601      |
| 238 | Ubp14   | 11886 | YssFSSQGLTLTVPR                       | S453/S454                | 1     | 2 | 1722.465       | 0.629      |
| 240 | Ubp15   | 2973  | IPTDNDDSRDsVAYALQR                    | S271                     | 1     | 2 | 2115.625       | 0.664      |
| 242 | Ubp15   | 13724 | LDHILsPVTAEDVPFHVR                    | S553                     | 1     | 2 | 2124.646       | 0.572      |
| 244 | Ubp15   | 4964  | YHGfDMtDFsASDDDPVLITTK                | T608                     | 1     | 3 | 2555.078       | 0.983      |
| 245 | Sst2    | 13745 | SSSDLPQFDYPsLNssPtFNsNLPISSSR         | S186/S189/S190/T192/S195 | 1     | 3 | 3225.128       | 1.66       |
| 247 | Sst2    | 7802  | FEKtsLSDSK                            | S208                     | 1     | 2 | 1221.125       | 0.559      |
| 249 | Sst2    | 12002 | LVsPEPLDDNKDIQFIK                     | S216                     | 1     | 2 | 2050.605       | 0.569      |
| 251 | Rpn11   | 10700 | VQNEVTLsPEQLR                         | S265                     | 1     | 2 | 1592.525       | 0.731      |
| 253 | Rpn1    | 6781  | DISSKsPSGNDALNDK                      | S10                      | 1     | 2 | 1727.405       | 0.63       |
| 255 | Rpn1    | 7133  | DISSKsPSGNDALNDKK                     | S10                      | 1     | 3 | 1855.628       | 0.758      |
| 257 | Rpn1    | 7071  | DISSKsPSGNDALNDKKGTK                  | S10                      | 1     | 3 | 2141.978       | 0.944      |
| 259 | Rpn2    | 8404  | TTEEKEAtPMEMDEEK                      | T856                     | 1     | 2 | 1977.305       | 0.508      |
| 261 | Rpn2    | 12078 | DAVPASADTEPGEQEAsPPEDFEYPFDDDD        | S952                     | 1     | 3 | 3335.258       | 0.973      |
| 263 | Rpn1301 | 14807 | DQDLLDPARsDVATVSDMMEVDtVEQSEPIAQPTSSK | S122                     | 1     | 3 | 4213.988       | 1.094      |



| b               | b(+2)           |    |   | y  | y(+2)           |                 |
|-----------------|-----------------|----|---|----|-----------------|-----------------|
| <b>114.091</b>  | 57.549          | 1  | L | 25 | 2906.312        | <b>1453.660</b> |
| 227.175         | 114.091         | 2  | I | 24 | 2793.228        | <b>1397.118</b> |
| <b>355.234</b>  | 178.121         | 3  | Q | 23 | 2680.144        | <b>1340.575</b> |
| <b>470.261</b>  | 235.634         | 4  | D | 22 | 2552.085        | <b>1276.546</b> |
| <b>583.345</b>  | 292.176         | 5  | L | 21 | 2437.058        | <b>1219.033</b> |
| 698.372         | 349.690         | 6  | D | 20 | 2323.974        | <b>1162.491</b> |
| <b>797.440</b>  | <b>399.224</b>  | 7  | V | 19 | 2208.947        | <b>1104.977</b> |
| 944.509         | 472.758         | 8  | F | 18 | 2109.879        | <b>1055.443</b> |
| <b>1059.536</b> | <b>530.271</b>  | 9  | D | 17 | 1962.810        | <b>981.909</b>  |
| <b>1226.568</b> | 613.788         | 10 | S | 16 | <b>1847.783</b> | <b>924.395</b>  |
| 1323.620        | <b>662.314</b>  | 11 | P | 15 | <b>1680.751</b> | <b>840.879</b>  |
| <b>1410.653</b> | <b>705.830</b>  | 12 | S | 14 | <b>1583.699</b> | <b>792.353</b>  |
| <b>1481.690</b> | <b>741.348</b>  | 13 | A | 13 | <b>1496.667</b> | <b>748.837</b>  |
| 1538.711        | <b>769.859</b>  | 14 | G | 12 | <b>1425.629</b> | <b>713.318</b>  |
| <b>1724.790</b> | <b>862.899</b>  | 15 | W | 11 | <b>1368.608</b> | <b>684.808</b>  |
| <b>1838.833</b> | <b>919.920</b>  | 16 | N | 10 | <b>1182.529</b> | <b>591.768</b>  |
| 1953.860        | <b>977.434</b>  | 17 | D | 9  | <b>1068.486</b> | <b>534.747</b>  |
| 2050.913        | <b>1025.960</b> | 18 | P | 8  | <b>953.459</b>  | <b>477.233</b>  |
| 2236.992        | <b>1119.000</b> | 19 | W | 7  | <b>856.406</b>  | 428.707         |
| 2324.024        | <b>1162.516</b> | 20 | S | 6  | <b>670.327</b>  | 335.667         |
| 2421.077        | <b>1211.042</b> | 21 | P | 5  | <b>583.295</b>  | 292.151         |
| 2558.136        | <b>1279.572</b> | 22 | H | 4  | <b>486.242</b>  | 243.625         |
| 2645.168        | <b>1323.088</b> | 23 | S | 3  | <b>349.183</b>  | 175.095         |
| 2732.200        | <b>1366.604</b> | 24 | S | 2  | 262.151         | 131.579         |
| 2888.301        | 1444.654        | 25 | R | 1  | 175.119         | 88.063          |

controllerType=0 controllerNumber=1 scan=14301

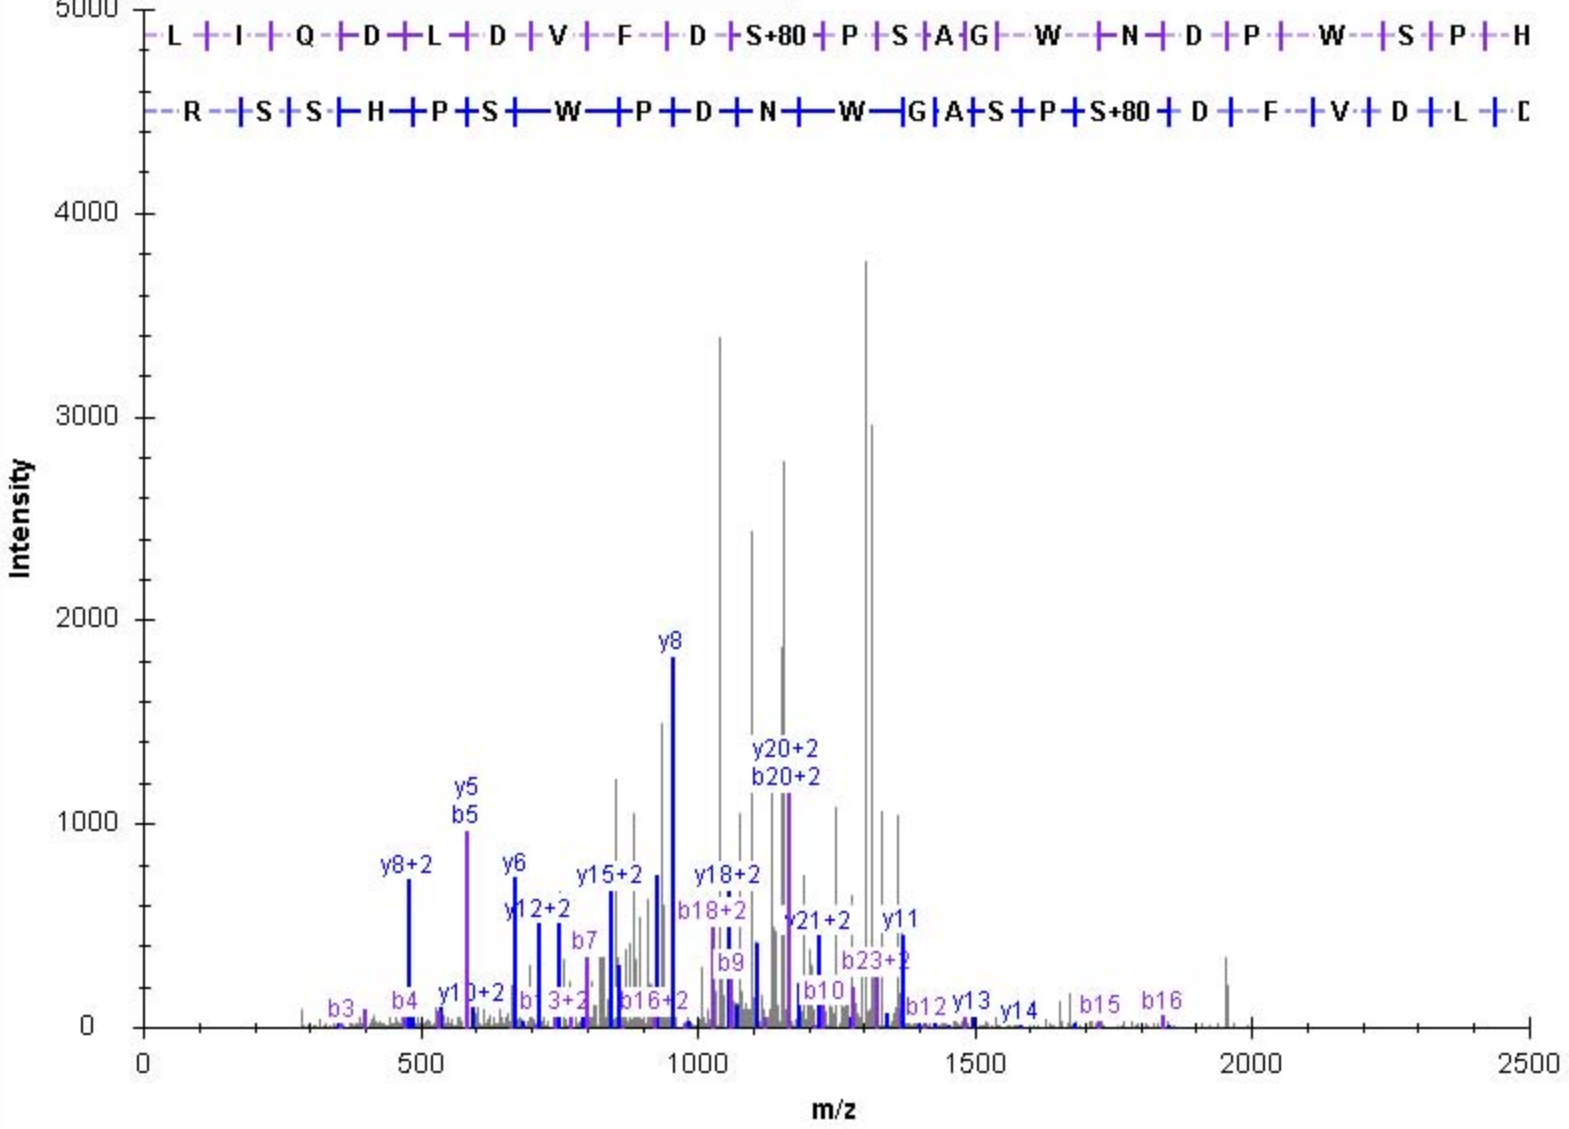

| b               | b(+2)           |    |   | y  | y(+2)           |                 |
|-----------------|-----------------|----|---|----|-----------------|-----------------|
| <b>114.091</b>  | 57.549          | 1  | L | 25 | 2906.312        | 1453.660        |
| 227.175         | 114.091         | 2  | I | 24 | 2793.228        | 1397.118        |
| <b>355.234</b>  | 178.121         | 3  | Q | 23 | 2680.144        | <b>1340.575</b> |
| <b>470.261</b>  | 235.634         | 4  | D | 22 | 2552.085        | 1276.546        |
| <b>583.345</b>  | <b>292.176</b>  | 5  | L | 21 | 2437.058        | 1219.033        |
| <b>698.372</b>  | 349.690         | 6  | D | 20 | 2323.974        | <b>1162.491</b> |
| <b>797.440</b>  | <b>399.224</b>  | 7  | V | 19 | 2208.947        | <b>1104.977</b> |
| <b>944.509</b>  | <b>472.758</b>  | 8  | F | 18 | 2109.879        | <b>1055.443</b> |
| <b>1059.536</b> | 530.271         | 9  | D | 17 | 1962.810        | <b>981.909</b>  |
| <b>1146.568</b> | <b>573.788</b>  | 10 | S | 16 | <b>1847.783</b> | <b>924.395</b>  |
| 1243.620        | 622.314         | 11 | P | 15 | <b>1760.751</b> | <b>880.879</b>  |
| <b>1330.653</b> | <b>665.830</b>  | 12 | S | 14 | 1663.699        | <b>832.353</b>  |
| <b>1401.690</b> | <b>701.348</b>  | 13 | A | 13 | 1576.667        | 788.837         |
| <b>1458.711</b> | 729.859         | 14 | G | 12 | <b>1505.629</b> | <b>753.318</b>  |
| <b>1644.790</b> | <b>822.899</b>  | 15 | W | 11 | <b>1448.608</b> | 724.808         |
| 1758.833        | <b>879.920</b>  | 16 | N | 10 | <b>1262.529</b> | <b>631.768</b>  |
| <b>1873.860</b> | <b>937.434</b>  | 17 | D | 9  | <b>1148.486</b> | 574.747         |
| 1970.913        | 985.960         | 18 | P | 8  | <b>1033.459</b> | <b>517.233</b>  |
| 2156.992        | <b>1079.000</b> | 19 | W | 7  | <b>936.406</b>  | <b>468.707</b>  |
| 2324.024        | <b>1162.516</b> | 20 | S | 6  | <b>750.327</b>  | <b>375.667</b>  |
| 2421.077        | <b>1211.042</b> | 21 | P | 5  | <b>583.295</b>  | <b>292.151</b>  |
| 2558.136        | 1279.572        | 22 | H | 4  | <b>486.242</b>  | 243.625         |
| 2645.168        | <b>1323.088</b> | 23 | S | 3  | <b>349.183</b>  | 175.095         |
| 2732.200        | <b>1366.604</b> | 24 | S | 2  | 262.151         | 131.579         |
| 2888.301        | 1444.654        | 25 | R | 1  | 175.119         | 88.063          |

controllerType=0 controllerNumber=1 scan=14450

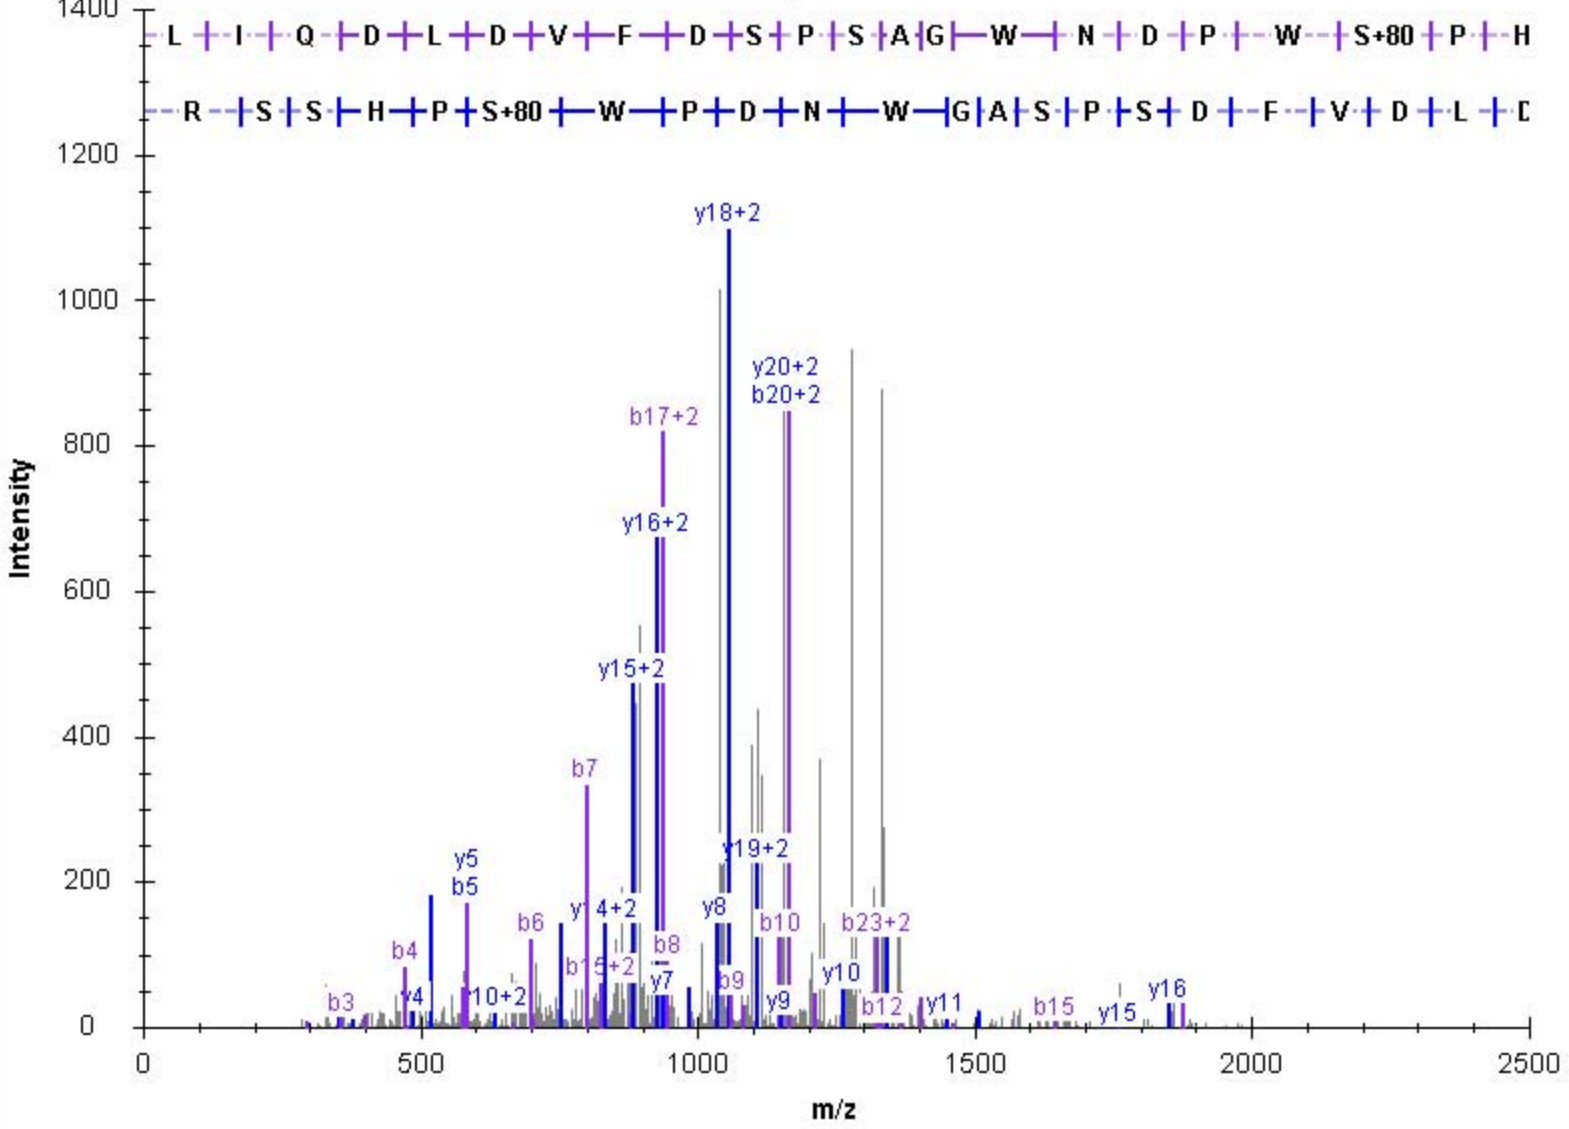

| b               | b(+2)           |    |   | y  | y(+2)           |                 |
|-----------------|-----------------|----|---|----|-----------------|-----------------|
| <b>116.034</b>  | 58.521          | 1  | D | 22 | 2708.283        | 1354.645        |
| 272.135         | 136.571         | 2  | R | 21 | 2593.256        | <b>1297.132</b> |
| <b>385.219</b>  | 193.113         | 3  | I | 20 | 2437.155        | <b>1219.081</b> |
| <b>482.272</b>  | 241.640         | 4  | P | 19 | 2324.071        | <b>1162.539</b> |
| <b>581.341</b>  | 291.174         | 5  | V | 18 | 2227.018        | 1114.013        |
| <b>744.404</b>  | 372.706         | 6  | Y | 17 | 2127.949        | 1064.478        |
| <b>907.467</b>  | 454.237         | 7  | Y | 16 | <b>1964.886</b> | 982.947         |
| <b>1036.510</b> | 518.759         | 8  | E | 15 | <b>1801.823</b> | 901.415         |
| <b>1165.552</b> | 583.280         | 9  | E | 14 | <b>1672.780</b> | 836.894         |
| <b>1294.595</b> | 647.801         | 10 | E | 13 | <b>1543.738</b> | 772.372         |
| <b>1423.638</b> | <b>712.322</b>  | 11 | E | 12 | <b>1414.695</b> | 707.851         |
| <b>1536.722</b> | 768.864         | 12 | L | 11 | <b>1285.652</b> | 643.330         |
| <b>1633.774</b> | 817.391         | 13 | P | 10 | <b>1172.568</b> | 586.788         |
| <b>1762.817</b> | 881.912         | 14 | E | 9  | <b>1075.516</b> | 538.261         |
| <b>1859.870</b> | 930.439         | 15 | P | 8  | <b>946.473</b>  | 473.740         |
| <b>1996.929</b> | 998.968         | 16 | H | 7  | <b>849.420</b>  | 425.214         |
| 2095.997        | <b>1048.502</b> | 17 | V | 6  | <b>712.361</b>  | 356.684         |
| 2197.045        | <b>1099.026</b> | 18 | T | 5  | <b>613.293</b>  | 307.150         |
| 2364.077        | <b>1182.542</b> | 19 | S | 4  | <b>512.245</b>  | 256.626         |
| 2461.130        | <b>1231.068</b> | 20 | P | 3  | 345.213         | 173.110         |
| 2562.177        | 1281.592        | 21 | T | 2  | 248.160         | 124.584         |
| 2690.272        | 1345.640        | 22 | K | 1  | 147.113         | 74.060          |

controllerType=0 controllerNumber=1 scan=11504

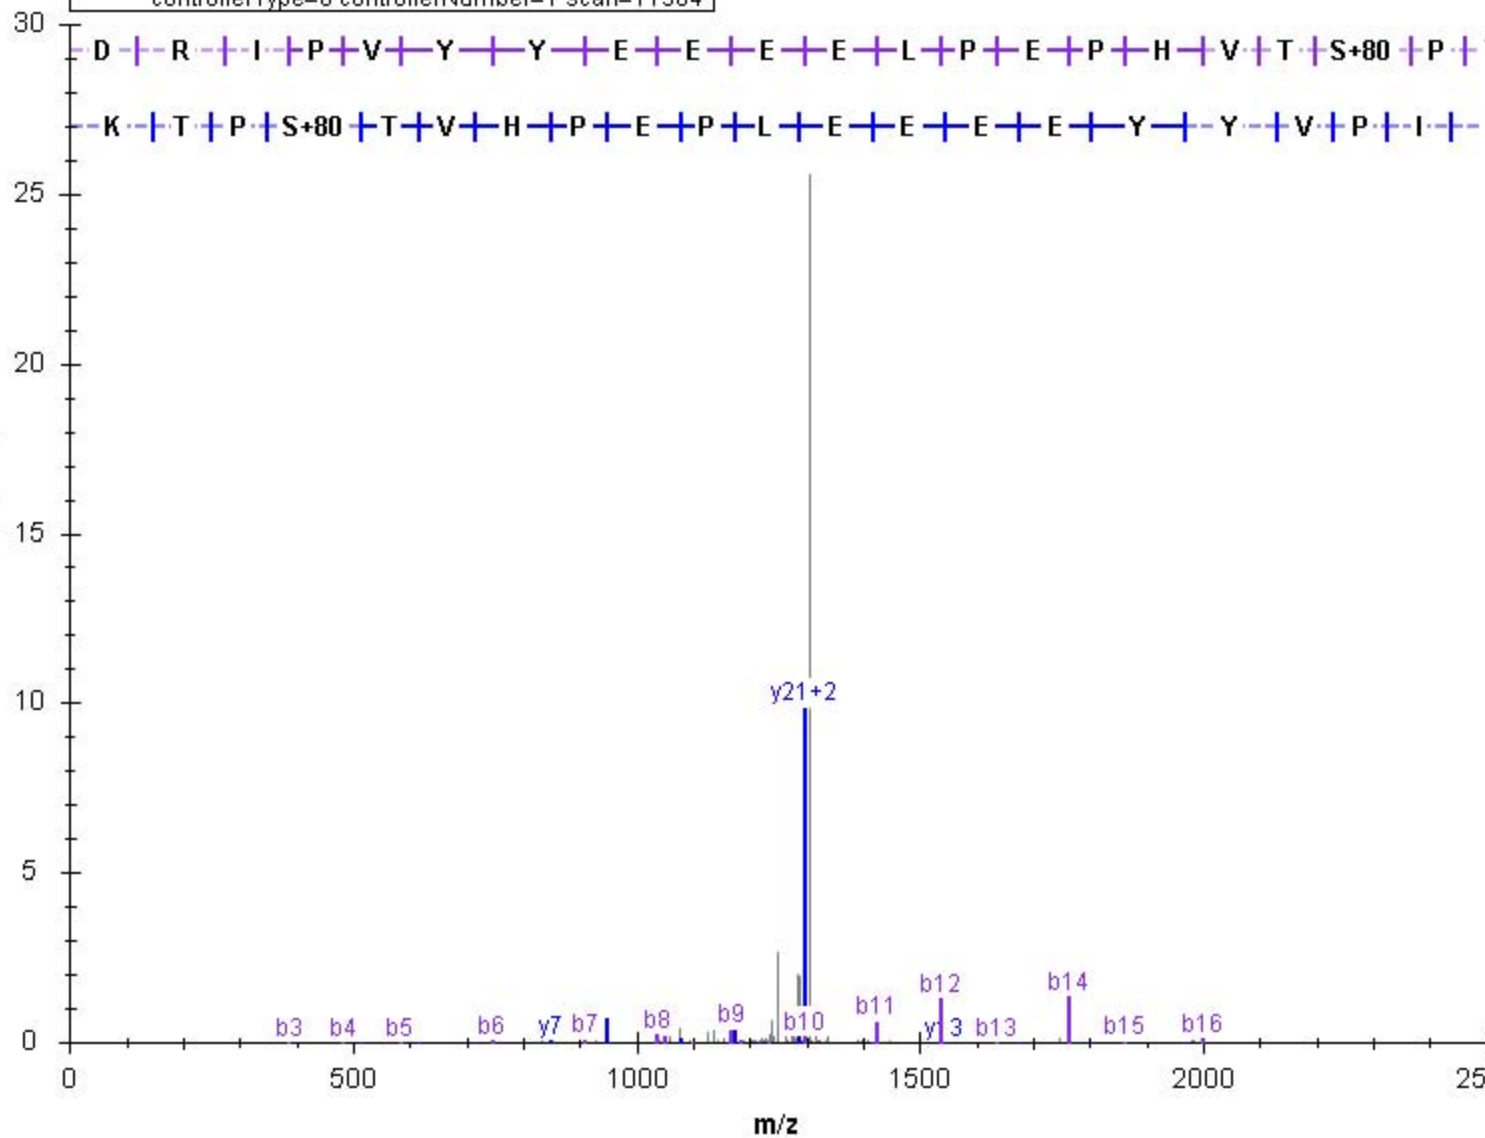

| b               | b(+2)           |    |   |    | y               | y(+2)           |
|-----------------|-----------------|----|---|----|-----------------|-----------------|
| 114.091         | 57.549          | 1  | I | 20 | 2437.155        | 1219.081        |
| 211.144         | 106.076         | 2  | P | 19 | 2324.071        | <b>1162.539</b> |
| <b>310.213</b>  | 155.610         | 3  | V | 18 | 2227.018        | <b>1114.013</b> |
| <b>473.276</b>  | <b>237.142</b>  | 4  | Y | 17 | 2127.949        | <b>1064.478</b> |
| <b>636.339</b>  | 318.673         | 5  | Y | 16 | <b>1964.886</b> | <b>982.947</b>  |
| <b>765.382</b>  | 383.195         | 6  | E | 15 | <b>1801.823</b> | <b>901.415</b>  |
| 894.424         | <b>447.716</b>  | 7  | E | 14 | 1672.780        | <b>836.894</b>  |
| <b>1023.467</b> | <b>512.237</b>  | 8  | E | 13 | 1543.738        | 772.372         |
| <b>1152.510</b> | <b>576.758</b>  | 9  | E | 12 | 1414.695        | <b>707.851</b>  |
| <b>1265.594</b> | <b>633.300</b>  | 10 | L | 11 | <b>1285.652</b> | <b>643.330</b>  |
| 1362.646        | <b>681.827</b>  | 11 | P | 10 | <b>1172.568</b> | <b>586.788</b>  |
| <b>1491.689</b> | 746.348         | 12 | E | 9  | 1075.516        | <b>538.261</b>  |
| 1588.742        | <b>794.875</b>  | 13 | P | 8  | <b>946.473</b>  | <b>473.740</b>  |
| 1725.801        | <b>863.404</b>  | 14 | H | 7  | <b>849.420</b>  | <b>425.214</b>  |
| 1824.869        | <b>912.938</b>  | 15 | V | 6  | <b>712.361</b>  | <b>356.684</b>  |
| 1925.917        | 963.462         | 16 | T | 5  | <b>613.293</b>  | 307.150         |
| 2092.949        | <b>1046.978</b> | 17 | S | 4  | <b>512.245</b>  | 256.626         |
| 2190.002        | <b>1095.504</b> | 18 | P | 3  | <b>345.213</b>  | 173.110         |
| 2291.049        | <b>1146.028</b> | 19 | T | 2  | <b>248.160</b>  | 124.584         |
| 2419.144        | 1210.076        | 20 | K | 1  | 147.113         | 74.060          |

controllerType=0 controllerNumber=1 scan=11634

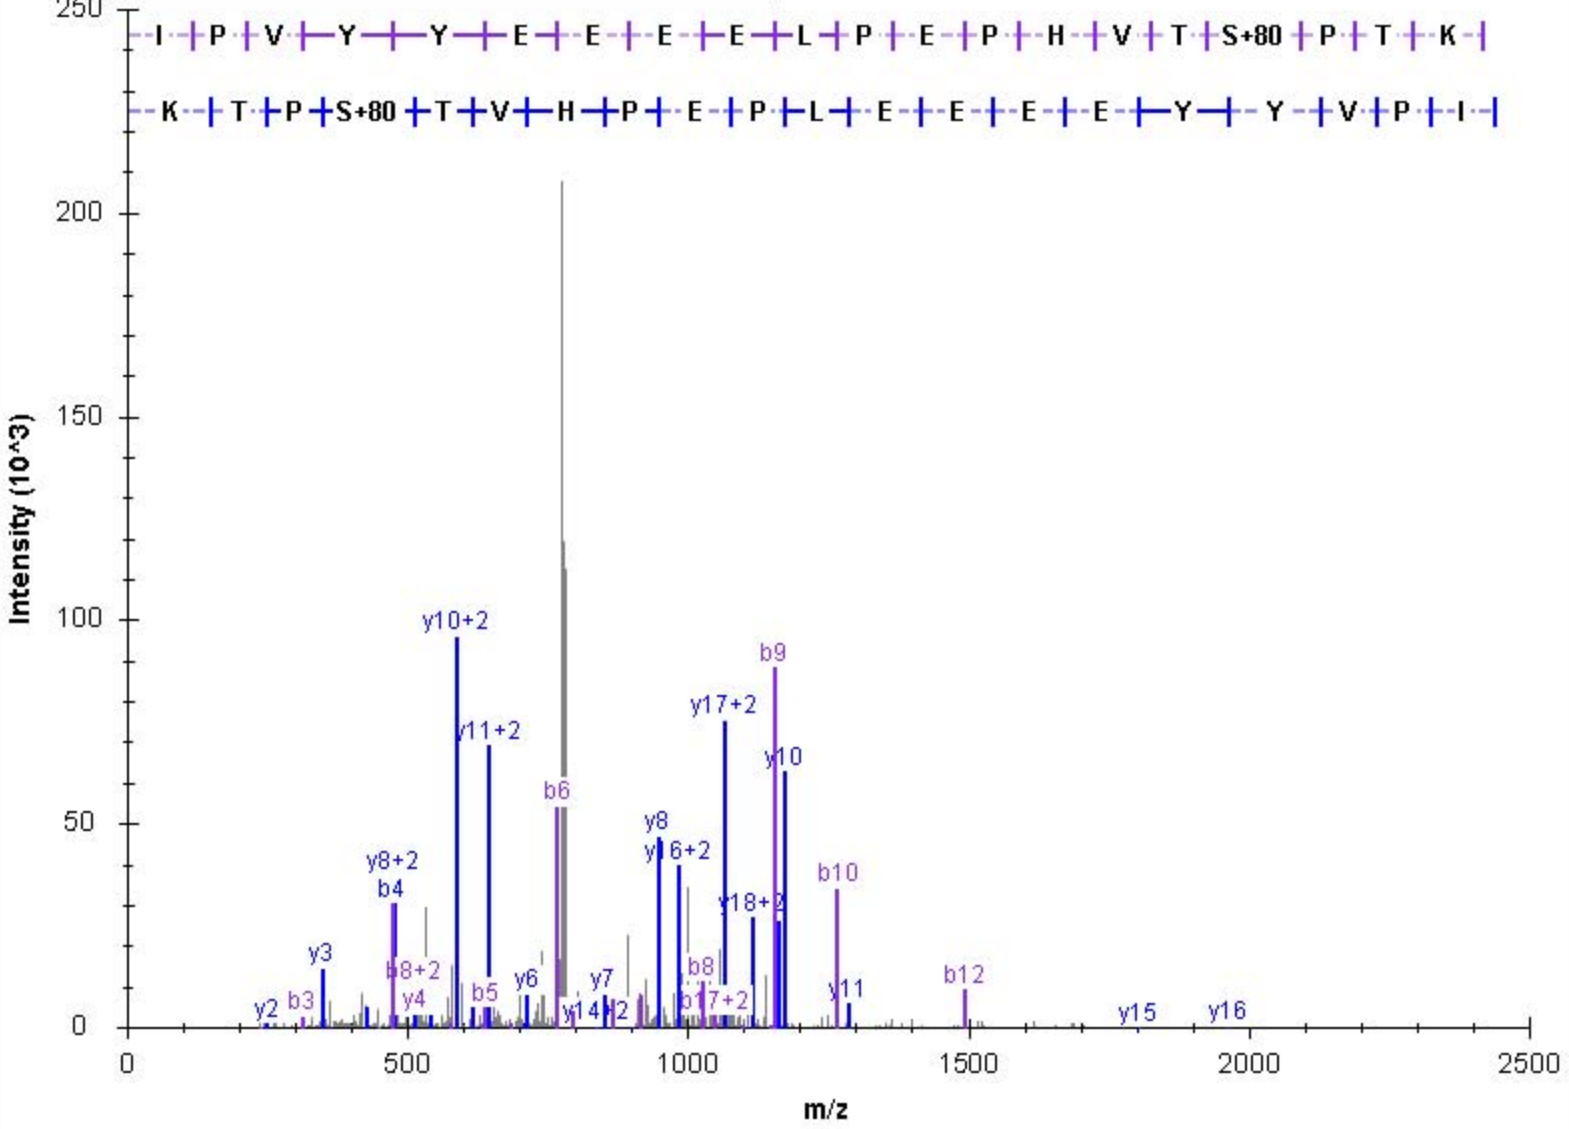



| b               | b(+2)           |    |   | y  | y(+2)           |                 |
|-----------------|-----------------|----|---|----|-----------------|-----------------|
| <b>114.091</b>  | 57.549          | 1  | I | 31 | 3680.655        | <b>1840.831</b> |
| 211.144         | 106.076         | 2  | P | 30 | 3567.571        | 1784.289        |
| 310.213         | 155.610         | 3  | V | 29 | 3470.518        | <b>1735.763</b> |
| 473.276         | 237.142         | 4  | Y | 28 | 3371.449        | <b>1686.228</b> |
| <b>636.339</b>  | 318.673         | 5  | Y | 27 | 3208.386        | <b>1604.697</b> |
| <b>765.382</b>  | 383.195         | 6  | E | 26 | 3045.323        | <b>1523.165</b> |
| <b>894.424</b>  | 447.716         | 7  | E | 25 | 2916.280        | <b>1458.644</b> |
| <b>1023.467</b> | 512.237         | 8  | E | 24 | 2787.237        | 1394.122        |
| <b>1152.510</b> | 576.758         | 9  | E | 23 | 2658.195        | <b>1329.601</b> |
| <b>1265.594</b> | <b>633.300</b>  | 10 | L | 22 | 2529.152        | <b>1265.080</b> |
| 1362.646        | 681.827         | 11 | P | 21 | 2416.068        | <b>1208.538</b> |
| <b>1491.689</b> | <b>746.348</b>  | 12 | E | 20 | 2319.015        | <b>1160.011</b> |
| <b>1588.742</b> | <b>794.875</b>  | 13 | P | 19 | 2189.973        | 1095.490        |
| <b>1725.801</b> | <b>863.404</b>  | 14 | H | 18 | 2092.920        | <b>1046.964</b> |
| <b>1824.869</b> | <b>912.938</b>  | 15 | V | 17 | <b>1955.861</b> | <b>978.434</b>  |
| <b>1925.917</b> | <b>963.462</b>  | 16 | T | 16 | <b>1856.793</b> | <b>928.900</b>  |
| 2092.949        | <b>1046.978</b> | 17 | S | 15 | <b>1755.745</b> | <b>878.376</b>  |
| 2190.002        | 1095.504        | 18 | P | 14 | <b>1588.713</b> | <b>794.860</b>  |
| 2291.049        | <b>1146.028</b> | 19 | T | 13 | <b>1491.660</b> | <b>746.334</b>  |
| 2419.144        | <b>1210.076</b> | 20 | K | 12 | <b>1390.613</b> | 695.810         |
| 2506.176        | <b>1253.592</b> | 21 | S | 11 | <b>1262.518</b> | <b>631.762</b>  |
| 2635.219        | 1318.113        | 22 | E | 10 | <b>1175.486</b> | <b>588.246</b>  |
| 2782.287        | 1391.647        | 23 | F | 9  | <b>1046.443</b> | <b>523.725</b>  |
| 2853.324        | <b>1427.166</b> | 24 | A | 8  | <b>899.375</b>  | 450.191         |
| 2954.372        | 1477.690        | 25 | T | 7  | <b>828.338</b>  | 414.672         |
| 3055.420        | <b>1528.213</b> | 26 | T | 6  | <b>727.290</b>  | 364.149         |
| 3142.452        | <b>1571.729</b> | 27 | S | 5  | <b>626.242</b>  | 313.625         |
| 3243.499        | <b>1622.253</b> | 28 | T | 4  | <b>539.210</b>  | 270.109         |
| 3403.509        | <b>1702.258</b> | 29 | C | 3  | <b>438.162</b>  | 219.585         |
| 3534.549        | <b>1767.778</b> | 30 | M | 2  | 278.153         | 139.580         |
| 3662.644        | 1831.826        | 31 | K | 1  | 147.113         | 74.060          |

controllerType=0 controllerNumber=1 scan=14706

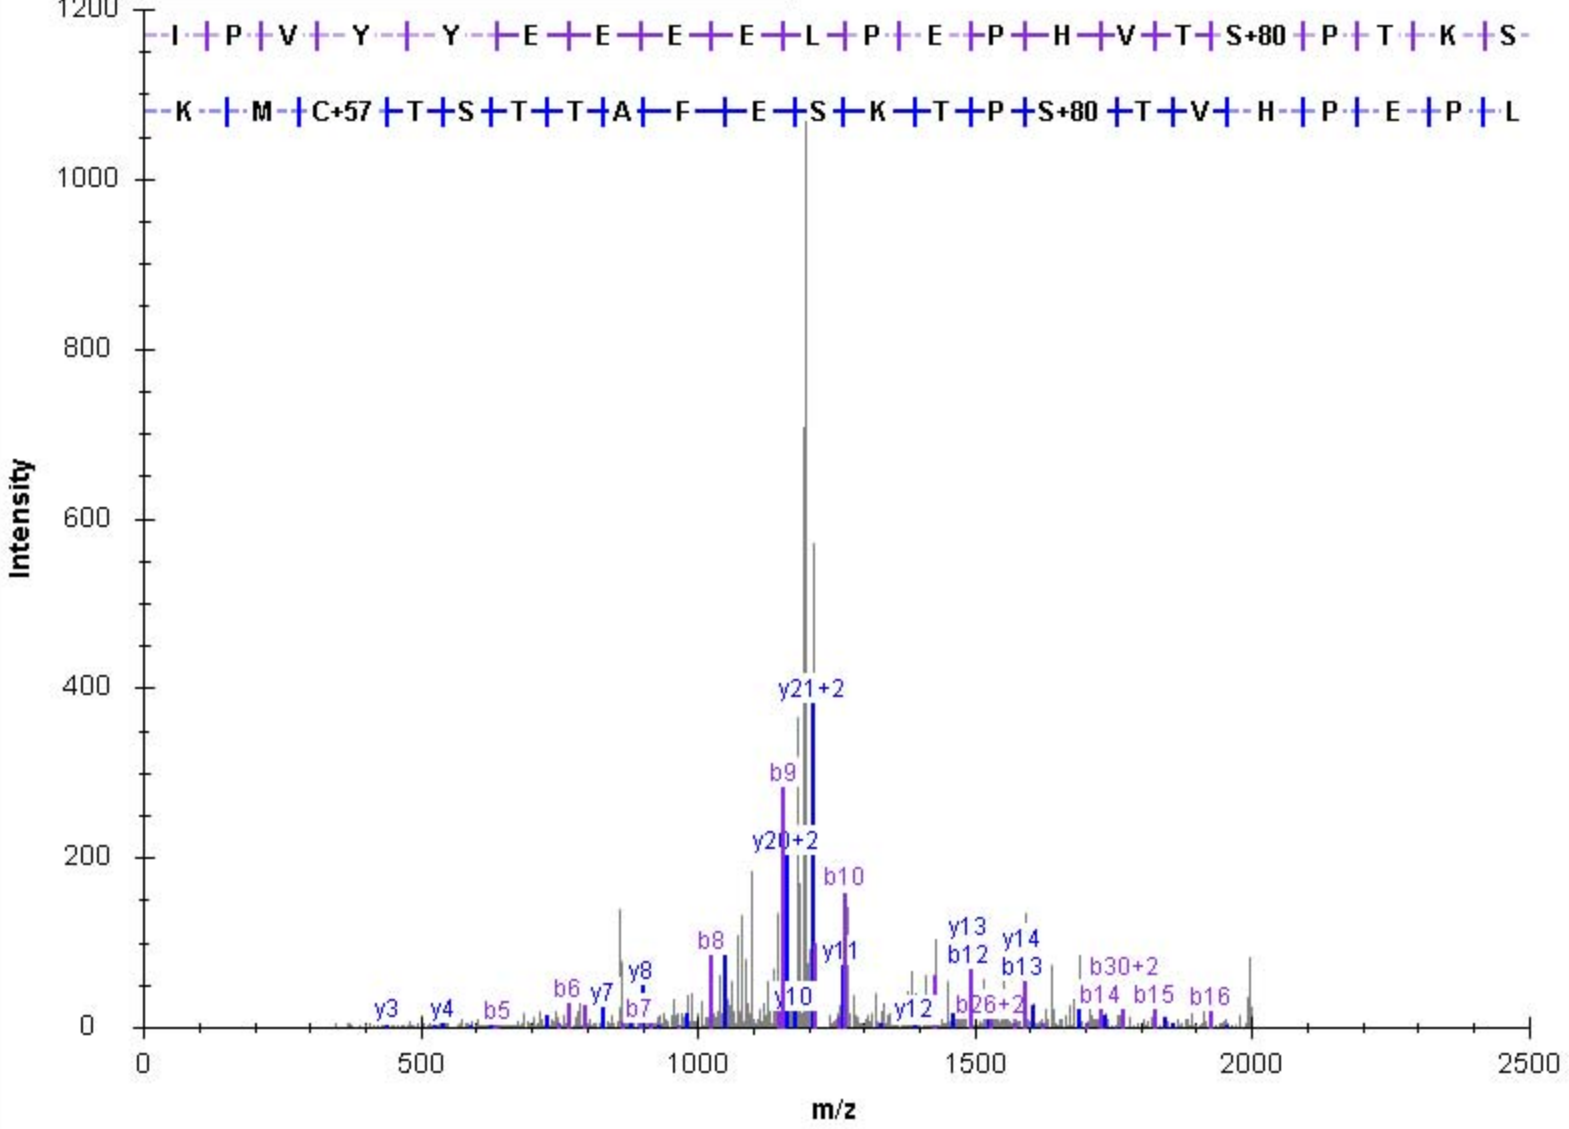

| b               | b(+2)           |    |   | y  | y(+2)           |                 |
|-----------------|-----------------|----|---|----|-----------------|-----------------|
| <b>114.091</b>  | 57.549          | 1  | I | 31 | 3696.655        | 1848.831        |
| 211.144         | 106.076         | 2  | P | 30 | 3583.571        | 1792.289        |
| 310.213         | 155.610         | 3  | V | 29 | 3486.518        | <b>1743.763</b> |
| <b>473.276</b>  | 237.142         | 4  | Y | 28 | 3387.449        | <b>1694.228</b> |
| <b>636.339</b>  | 318.673         | 5  | Y | 27 | 3224.386        | 1612.697        |
| <b>765.382</b>  | 383.195         | 6  | E | 26 | 3061.323        | <b>1531.165</b> |
| <b>894.424</b>  | <b>447.716</b>  | 7  | E | 25 | 2932.280        | 1466.644        |
| <b>1023.467</b> | 512.237         | 8  | E | 24 | 2803.237        | 1402.122        |
| <b>1152.510</b> | <b>576.758</b>  | 9  | E | 23 | 2674.195        | <b>1337.601</b> |
| <b>1265.594</b> | 633.300         | 10 | L | 22 | 2545.152        | <b>1273.080</b> |
| <b>1362.646</b> | <b>681.827</b>  | 11 | P | 21 | 2432.068        | <b>1216.538</b> |
| <b>1491.689</b> | <b>746.348</b>  | 12 | E | 20 | 2335.015        | <b>1168.011</b> |
| <b>1588.742</b> | <b>794.875</b>  | 13 | P | 19 | 2205.973        | <b>1103.490</b> |
| <b>1725.801</b> | <b>863.404</b>  | 14 | H | 18 | 2108.920        | <b>1054.964</b> |
| <b>1824.869</b> | 912.938         | 15 | V | 17 | <b>1971.861</b> | 986.434         |
| 2005.917        | <b>1003.462</b> | 16 | T | 16 | <b>1872.793</b> | 936.900         |
| 2092.949        | <b>1046.978</b> | 17 | S | 15 | 1691.745        | <b>846.376</b>  |
| 2190.002        | 1095.504        | 18 | P | 14 | <b>1604.713</b> | <b>802.860</b>  |
| 2291.049        | <b>1146.028</b> | 19 | T | 13 | <b>1507.660</b> | <b>754.334</b>  |
| 2419.144        | <b>1210.076</b> | 20 | K | 12 | <b>1406.613</b> | <b>703.810</b>  |
| 2506.176        | <b>1253.592</b> | 21 | S | 11 | <b>1278.518</b> | <b>639.762</b>  |
| 2635.219        | 1318.113        | 22 | E | 10 | <b>1191.486</b> | 596.246         |
| 2782.287        | <b>1391.647</b> | 23 | F | 9  | <b>1062.443</b> | 531.725         |
| 2853.324        | <b>1427.166</b> | 24 | A | 8  | <b>915.375</b>  | 458.191         |
| 2954.372        | <b>1477.690</b> | 25 | T | 7  | <b>844.338</b>  | 422.672         |
| 3055.420        | <b>1528.213</b> | 26 | T | 6  | <b>743.290</b>  | 372.149         |
| 3142.452        | <b>1571.729</b> | 27 | S | 5  | <b>642.242</b>  | 321.625         |
| 3243.499        | 1622.253        | 28 | T | 4  | <b>555.210</b>  | 278.109         |
| 3403.509        | <b>1702.258</b> | 29 | C | 3  | <b>454.162</b>  | 227.585         |
| 3550.549        | 1775.778        | 30 | M | 2  | 294.153         | 147.580         |
| 3678.644        | 1839.826        | 31 | K | 1  | 147.113         | 74.060          |

controllerType=0 controllerNumber=1 scan=11490

Intensity (10<sup>3</sup>)

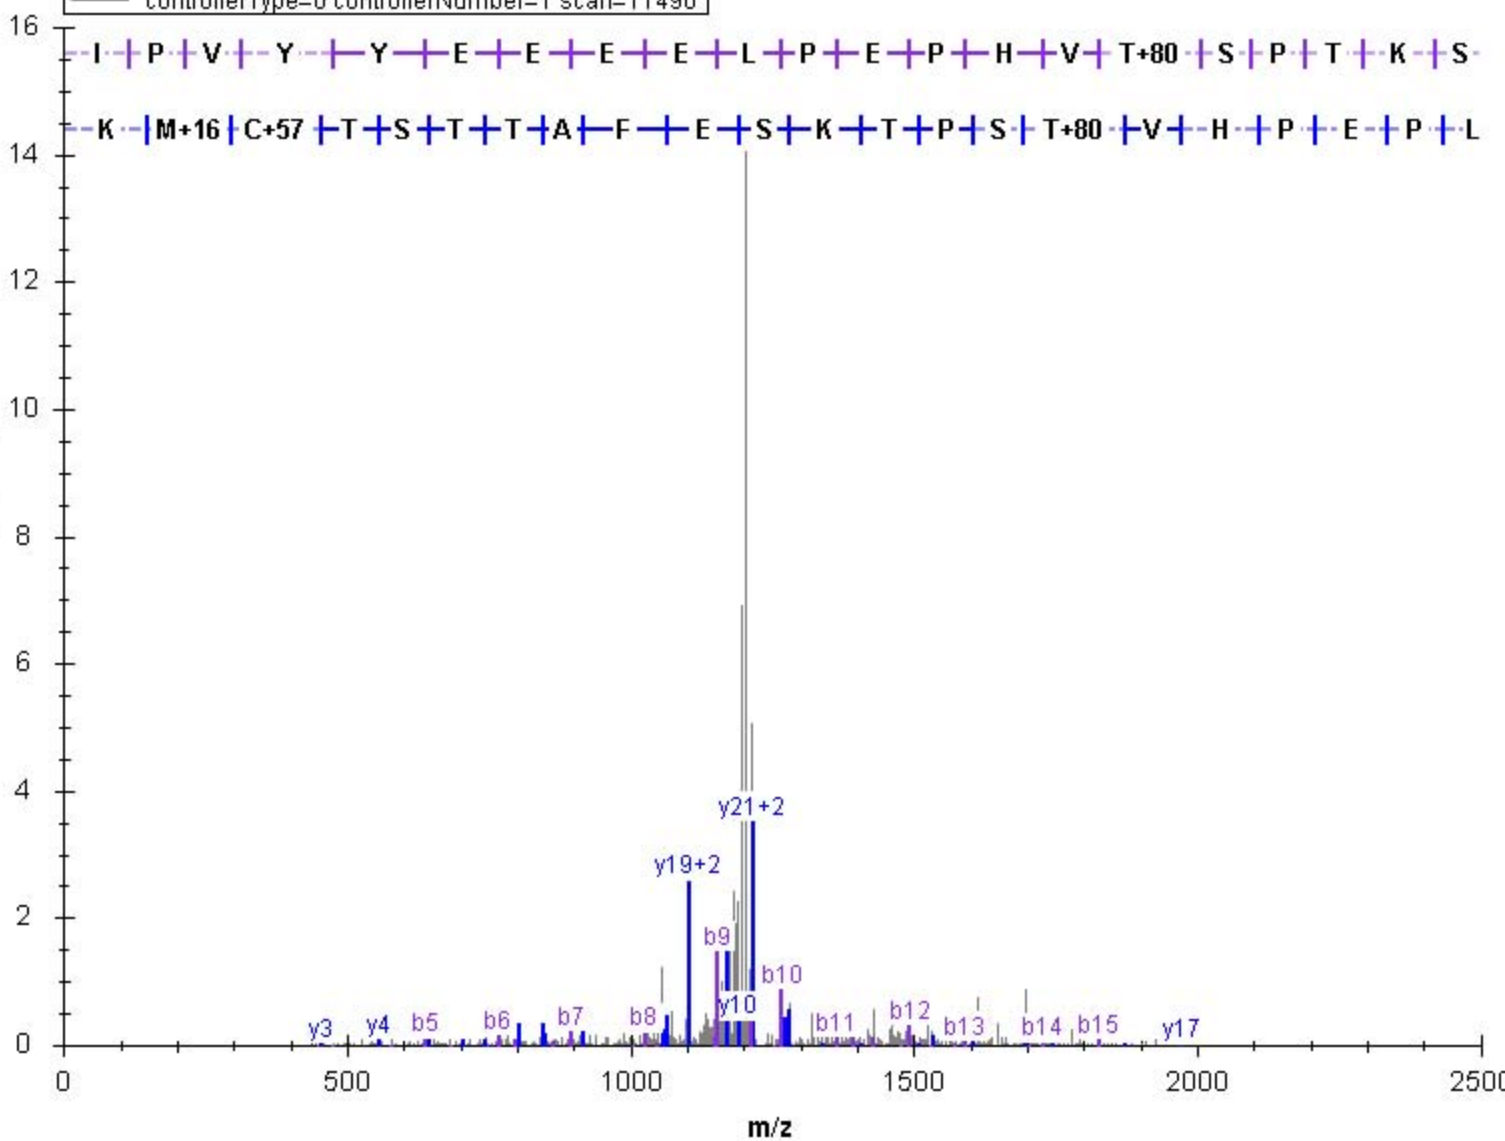

| b               | b(+2)          |    |   |    | y               | y(+2)          |
|-----------------|----------------|----|---|----|-----------------|----------------|
| 102.055         | 51.531         | 1  | T | 11 | 1457.701        | 729.354        |
| 203.103         | 102.055        | 2  | T | 10 | 1356.653        | <b>678.830</b> |
| <b>331.198</b>  | 166.102        | 3  | K | 9  | <b>1255.606</b> | <b>628.306</b> |
| <b>498.230</b>  | 249.618        | 4  | S | 8  | <b>1127.511</b> | 564.259        |
| <b>627.272</b>  | <b>314.140</b> | 5  | E | 7  | <b>960.479</b>  | <b>480.743</b> |
| <b>740.356</b>  | 370.682        | 6  | I | 6  | <b>831.436</b>  | 416.222        |
| <b>869.399</b>  | 435.203        | 7  | E | 5  | <b>718.352</b>  | <b>359.680</b> |
| <b>968.467</b>  | <b>484.737</b> | 8  | V | 4  | <b>589.309</b>  | <b>295.158</b> |
| <b>1097.510</b> | <b>549.259</b> | 9  | E | 3  | <b>490.241</b>  | 245.624        |
| <b>1283.589</b> | <b>642.298</b> | 10 | W | 2  | <b>361.198</b>  | 181.103        |
| 1439.690        | <b>720.349</b> | 11 | R | 1  | 175.119         | 88.063         |

controllerType=0 controllerNumber=1 scan=9205

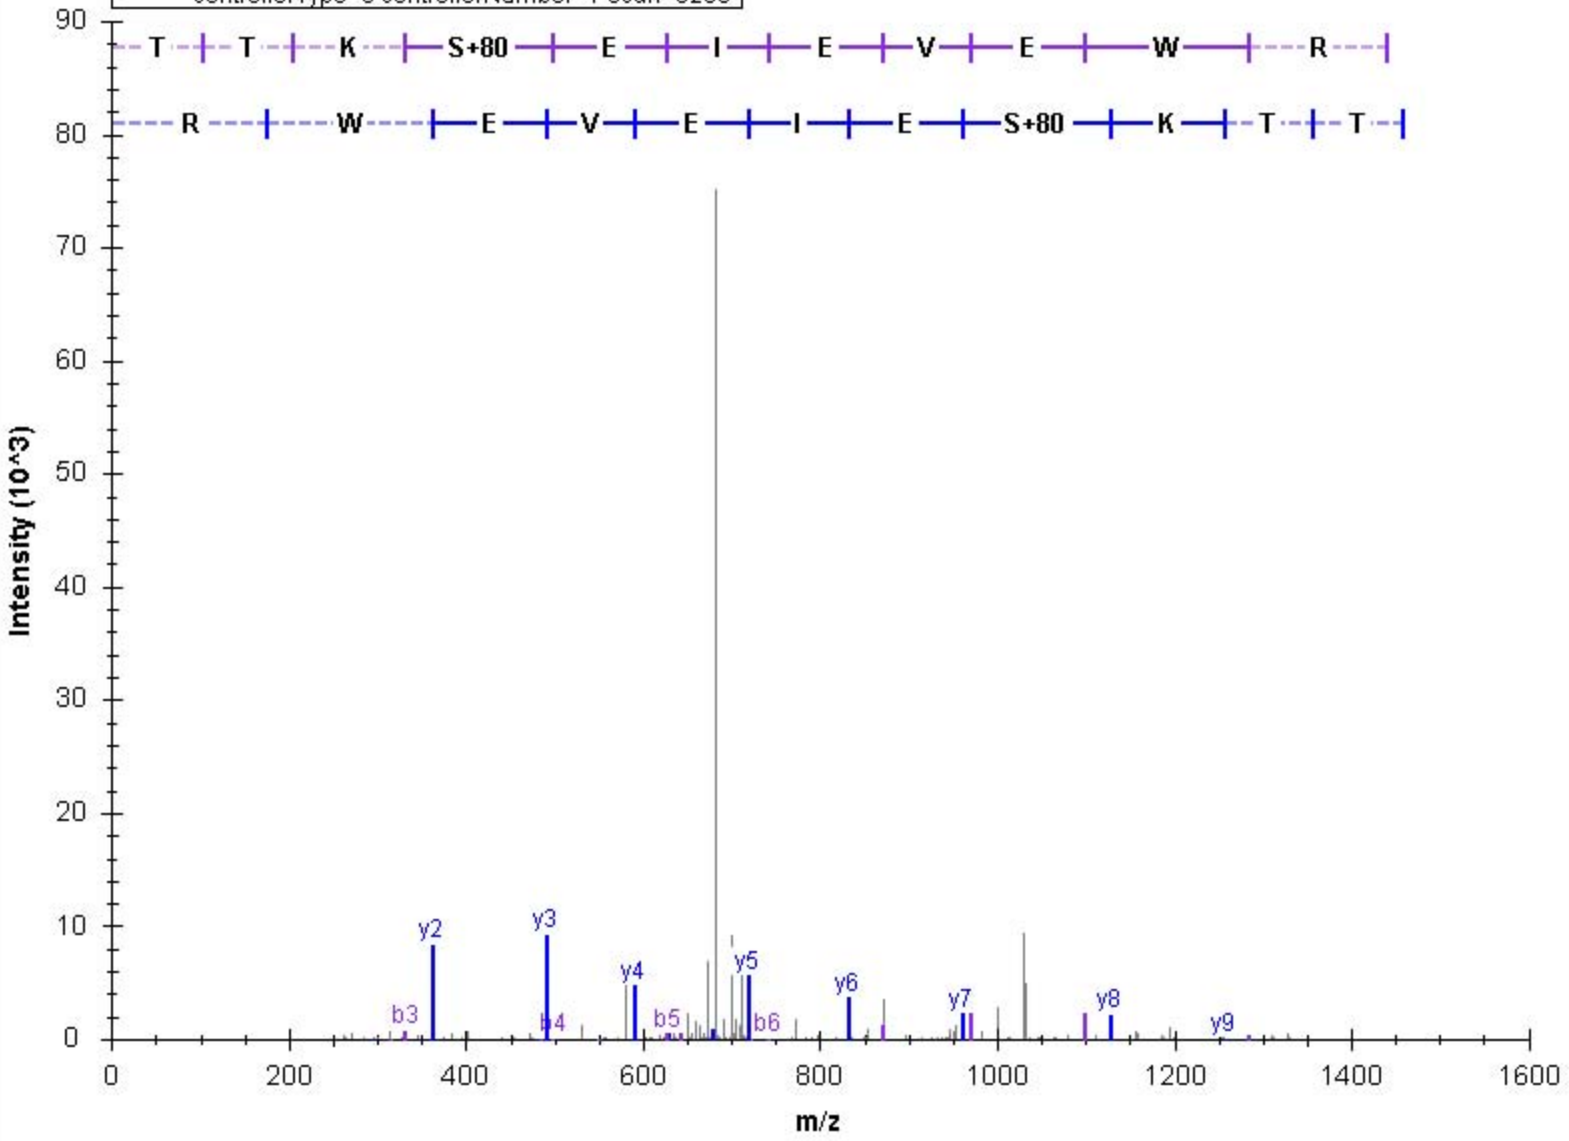

| b               | b(+2)          |    |   | y  | y(+2)                   |
|-----------------|----------------|----|---|----|-------------------------|
| <b>88.039</b>   | 44.523         | 1  | S | 27 | 3048.444 1524.725       |
| 175.071         | 88.039         | 2  | S | 26 | 2961.412 1481.209       |
| 262.103         | 131.555        | 3  | S | 25 | 2874.379 1437.693       |
| <b>399.162</b>  | 200.085        | 4  | H | 24 | 2787.347 1394.177       |
| <b>527.221</b>  | 264.114        | 5  | Q | 23 | 2650.289 1325.648       |
| 584.242         | 292.625        | 6  | G | 22 | 2522.230 1261.619       |
| <b>671.274</b>  | 336.141        | 7  | S | 21 | 2465.209 1233.108       |
| <b>758.306</b>  | 379.657        | 8  | S | 20 | 2378.176 1189.592       |
| 895.365         | 448.186        | 9  | H | 19 | 2291.144 1146.076       |
| 1062.397        | 531.702        | 10 | S | 18 | 2154.086 1077.546       |
| <b>1149.429</b> | <b>575.218</b> | 11 | S | 17 | 1987.054 994.030        |
| 1277.488        | 639.248        | 12 | Q | 16 | 1900.021 950.514        |
| 1374.541        | 687.774        | 13 | P | 15 | 1771.963 886.485        |
| 1461.573        | 731.290        | 14 | S | 14 | 1674.910 837.959        |
| 1574.657        | 787.832        | 15 | L | 13 | 1587.878 794.443        |
| 1721.725        | <b>861.366</b> | 16 | F | 12 | 1474.794 <b>737.901</b> |
| 1822.773        | 911.890        | 17 | T | 11 | 1327.726 664.366        |
| 1923.821        | 962.414        | 18 | T | 10 | 1226.678 <b>613.843</b> |
| 2070.889        | 1035.948       | 19 | F | 9  | 1125.630 563.319        |
| 2171.937        | 1086.472       | 20 | T | 8  | 978.562 489.785         |
| 2258.969        | 1129.988       | 21 | S | 7  | 877.514 439.261         |
| 2372.053        | 1186.530       | 22 | L | 6  | <b>790.482</b> 395.745  |
| 2501.095        | 1251.051       | 23 | E | 5  | 677.398 339.203         |
| 2614.179        | 1307.593       | 24 | L | 4  | 548.355 274.681         |
| 2761.248        | 1381.128       | 25 | F | 3  | 435.271 218.139         |
| 2874.332        | 1437.670       | 26 | L | 2  | 288.203 144.605         |
| 3030.433        | 1515.720       | 27 | R | 1  | 175.119 88.063          |

controllerType=0 controllerNumber=1 scan=15897

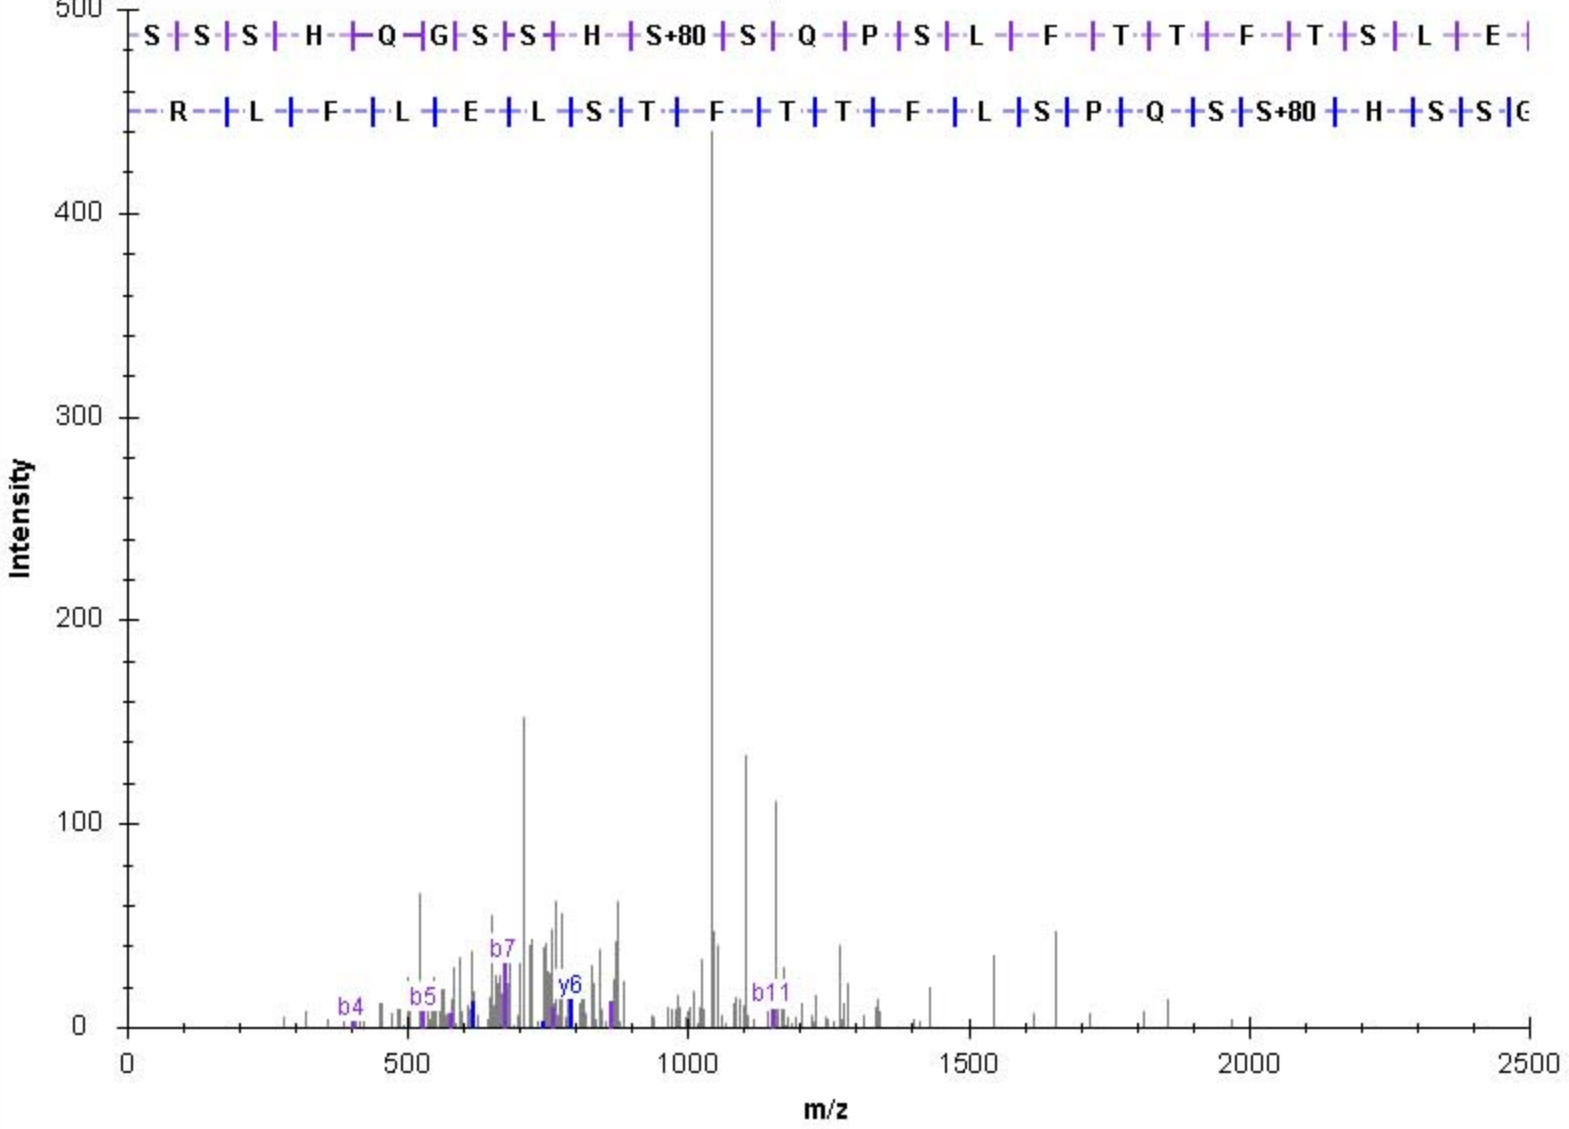



| b               | b(+2)          |    |   |    | y               | y(+2)          |
|-----------------|----------------|----|---|----|-----------------|----------------|
| <b>88.039</b>   | 44.523         | 1  | S | 13 | 1393.600        | 697.304        |
| 145.061         | 73.034         | 2  | G | 12 | 1306.568        | <b>653.788</b> |
| <b>246.108</b>  | 123.558        | 3  | T | 11 | 1249.547        | <b>625.277</b> |
| <b>413.140</b>  | <b>207.074</b> | 4  | S | 10 | <b>1148.499</b> | <b>574.753</b> |
| <b>500.173</b>  | 250.590        | 5  | S | 9  | <b>981.467</b>  | <b>491.237</b> |
| <b>599.241</b>  | <b>300.124</b> | 6  | V | 8  | <b>894.435</b>  | <b>447.721</b> |
| <b>730.281</b>  | 365.644        | 7  | M | 7  | <b>795.367</b>  | 398.187        |
| <b>845.308</b>  | 423.158        | 8  | D | 6  | <b>664.326</b>  | <b>332.667</b> |
| <b>958.392</b>  | <b>479.700</b> | 9  | L | 5  | <b>549.299</b>  | 275.153        |
| <b>1045.424</b> | <b>523.216</b> | 10 | S | 4  | <b>436.215</b>  | 218.611        |
| <b>1132.456</b> | 566.732        | 11 | S | 3  | <b>349.183</b>  | 175.095        |
| <b>1219.488</b> | <b>610.248</b> | 12 | S | 2  | <b>262.151</b>  | 131.579        |
| 1375.590        | <b>688.298</b> | 13 | R | 1  | 175.119         | 88.063         |

controllerType=0 controllerNumber=1 scan=6965

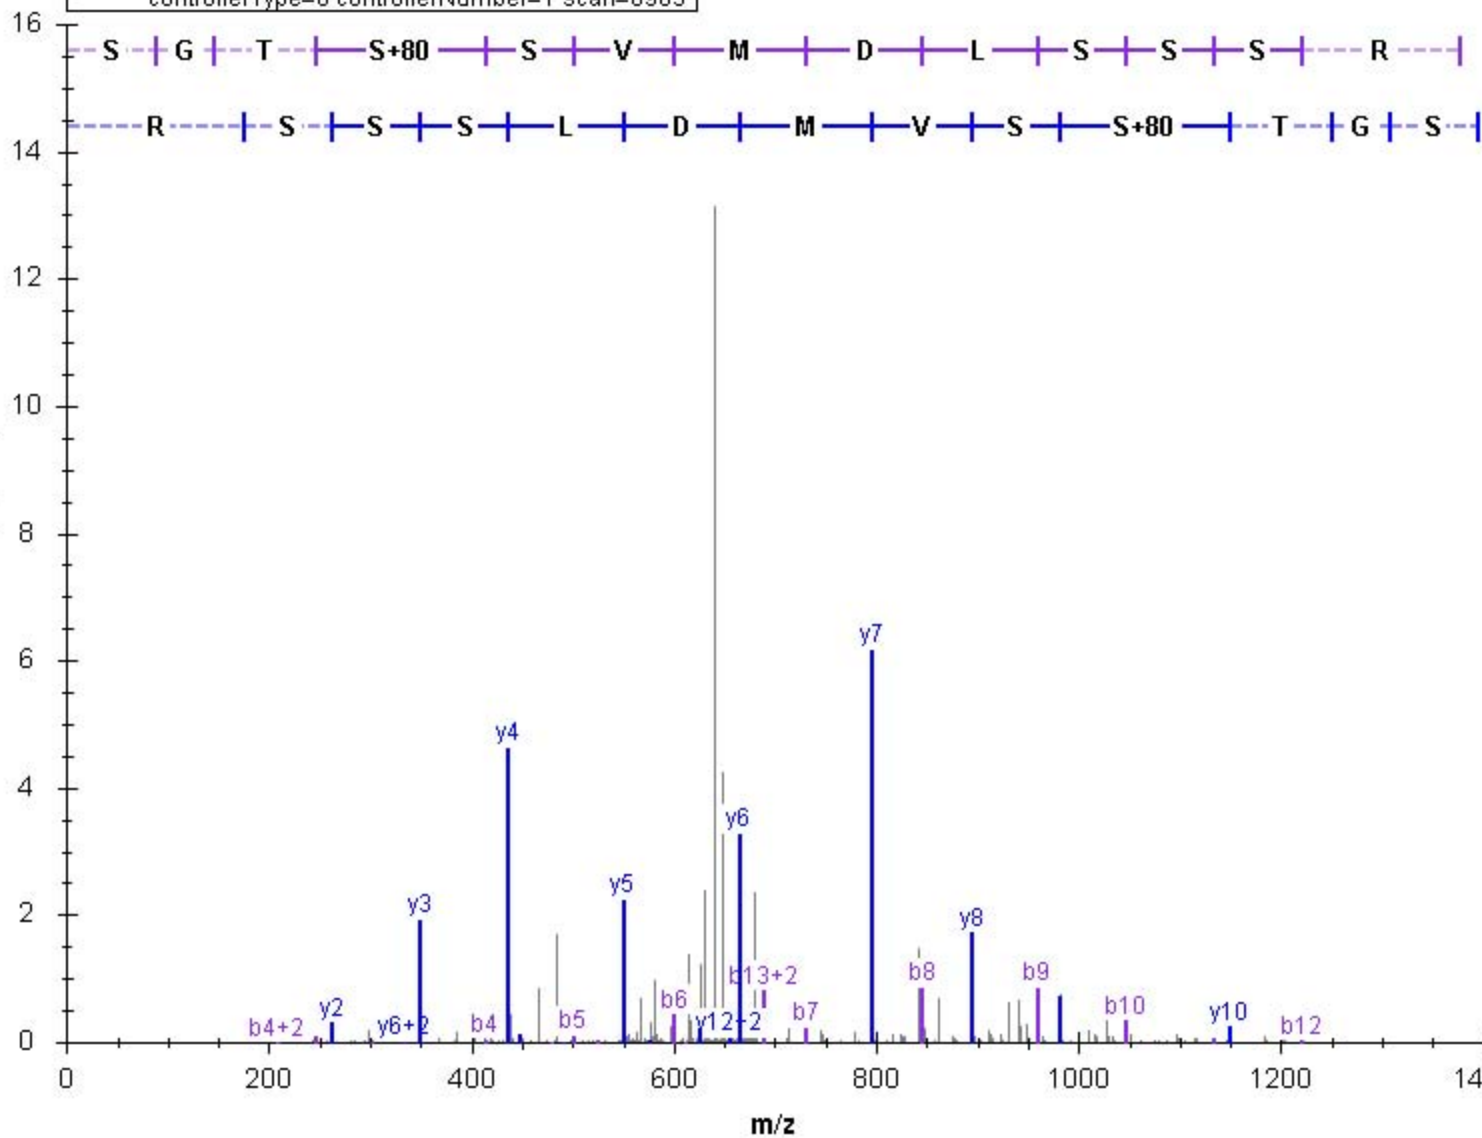

| b               | b(+2)          |    |   |    | y               | y(+2)          |
|-----------------|----------------|----|---|----|-----------------|----------------|
| <b>88.039</b>   | 44.523         | 1  | S | 13 | 1473.600        | 737.304        |
| 145.061         | 73.034         | 2  | G | 12 | 1386.568        | <b>693.788</b> |
| <b>246.108</b>  | 123.558        | 3  | T | 11 | 1329.547        | <b>665.277</b> |
| <b>413.140</b>  | 207.074        | 4  | S | 10 | <b>1228.499</b> | <b>614.753</b> |
| <b>580.173</b>  | <b>290.590</b> | 5  | S | 9  | <b>1061.467</b> | <b>531.237</b> |
| <b>679.241</b>  | <b>340.124</b> | 6  | V | 8  | <b>894.435</b>  | <b>447.721</b> |
| <b>810.281</b>  | 405.644        | 7  | M | 7  | <b>795.367</b>  | 398.187        |
| <b>925.308</b>  | 463.158        | 8  | D | 6  | <b>664.326</b>  | <b>332.667</b> |
| <b>1038.392</b> | <b>519.700</b> | 9  | L | 5  | <b>549.299</b>  | 275.153        |
| <b>1125.424</b> | <b>563.216</b> | 10 | S | 4  | <b>436.215</b>  | <b>218.611</b> |
| <b>1212.456</b> | 606.732        | 11 | S | 3  | <b>349.183</b>  | 175.095        |
| <b>1299.488</b> | <b>650.248</b> | 12 | S | 2  | <b>262.151</b>  | 131.579        |
| 1455.590        | <b>728.298</b> | 13 | R | 1  | 175.119         | 88.063         |

controllerType=0 controllerNumber=1 scan=11165

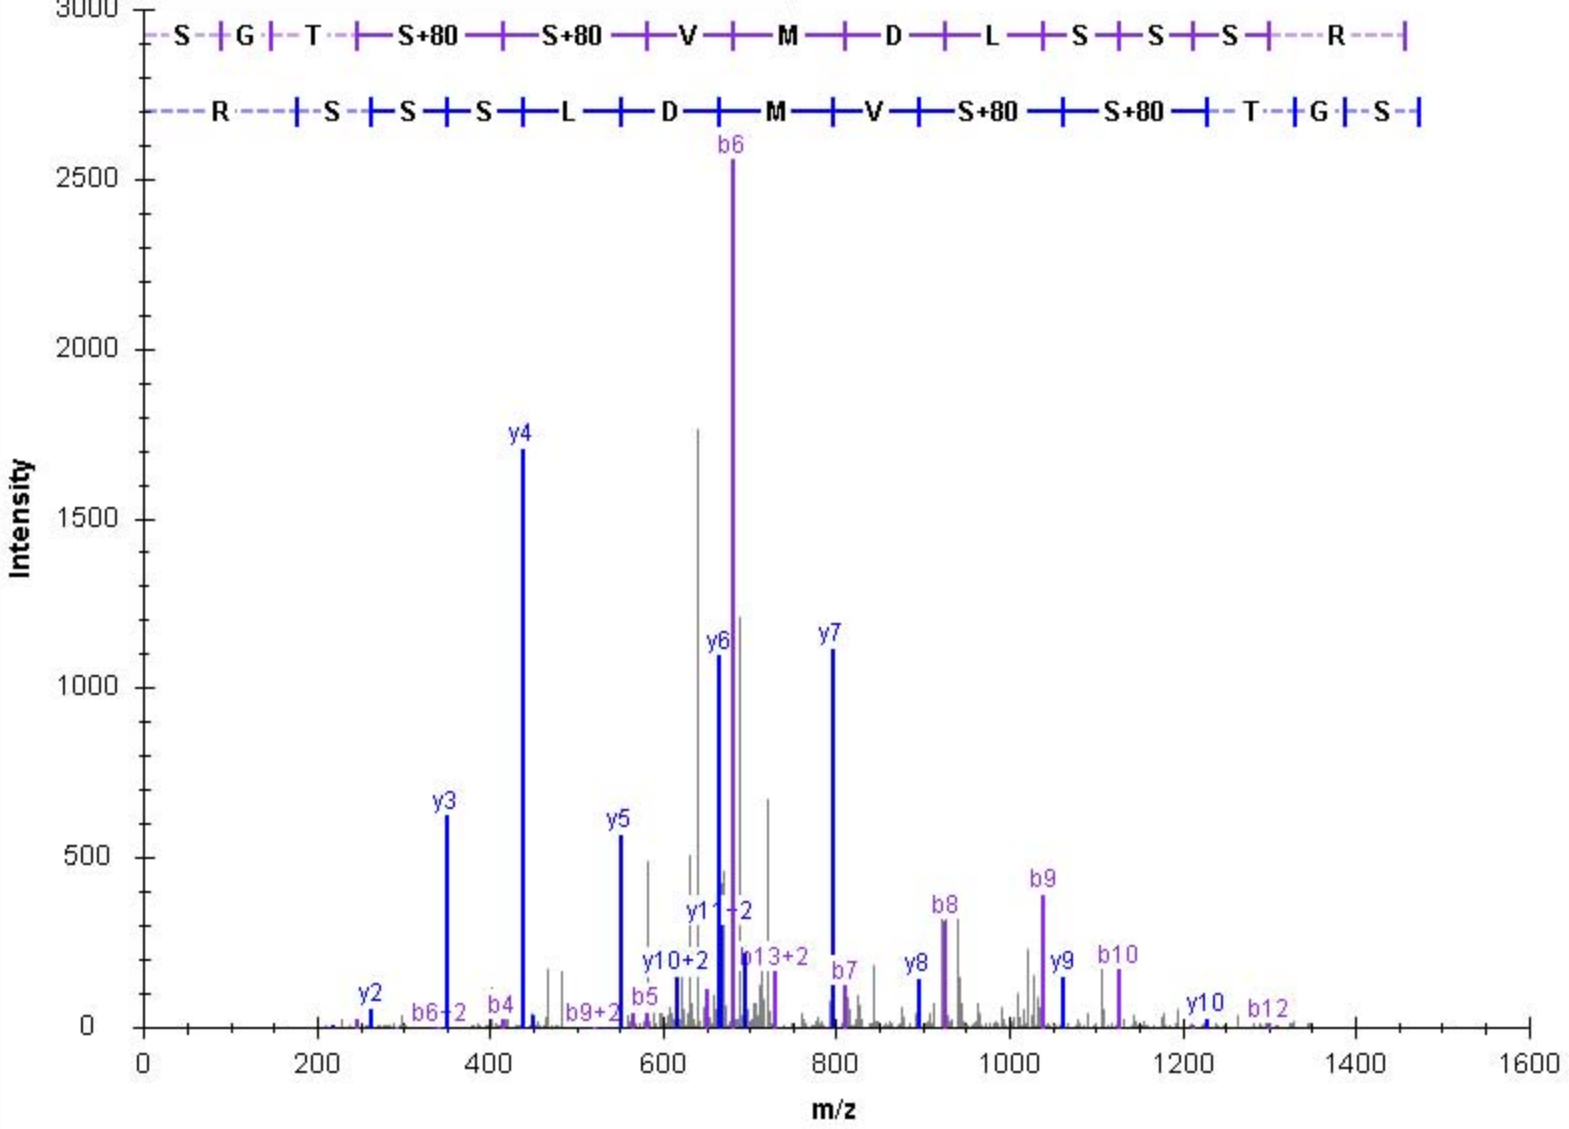

| b               | b(+2)           |    |   | y  | y(+2)           |                 |
|-----------------|-----------------|----|---|----|-----------------|-----------------|
| <b>88.039</b>   | 44.523          | 1  | S | 21 | 2349.072        | 1175.040        |
| 145.061         | 73.034          | 2  | G | 20 | 2262.040        | <b>1131.524</b> |
| <b>246.108</b>  | 123.558         | 3  | T | 19 | 2205.019        | 1103.013        |
| <b>333.140</b>  | 167.074         | 4  | S | 18 | 2103.971        | <b>1052.489</b> |
| 420.173         | 210.590         | 5  | S | 17 | 2016.939        | <b>1008.973</b> |
| <b>519.241</b>  | 260.124         | 6  | V | 16 | 1929.907        | <b>965.457</b>  |
| 650.281         | <b>325.644</b>  | 7  | M | 15 | 1830.839        | <b>915.923</b>  |
| 765.308         | <b>383.158</b>  | 8  | D | 14 | 1699.798        | <b>850.403</b>  |
| <b>878.392</b>  | 439.700         | 9  | L | 13 | 1584.771        | <b>792.889</b>  |
| <b>965.424</b>  | <b>483.216</b>  | 10 | S | 12 | 1471.687        | <b>736.347</b>  |
| <b>1052.456</b> | 526.732         | 11 | S | 11 | 1384.655        | <b>692.831</b>  |
| 1219.488        | 610.248         | 12 | S | 10 | 1297.623        | <b>649.315</b>  |
| 1375.590        | <b>688.298</b>  | 13 | R | 9  | <b>1130.591</b> | <b>565.799</b>  |
| <b>1504.632</b> | <b>752.820</b>  | 14 | E | 8  | <b>974.490</b>  | 487.749         |
| <b>1617.716</b> | <b>809.362</b>  | 15 | L | 7  | <b>845.448</b>  | <b>423.227</b>  |
| <b>1704.748</b> | <b>852.878</b>  | 16 | S | 6  | <b>732.363</b>  | <b>366.685</b>  |
| 1818.791        | <b>909.899</b>  | 17 | N | 5  | <b>645.331</b>  | <b>323.169</b>  |
| <b>1931.875</b> | 966.441         | 18 | L | 4  | <b>531.289</b>  | 266.148         |
| 2045.918        | <b>1023.463</b> | 19 | N | 3  | <b>418.204</b>  | 209.606         |
| 2174.961        | <b>1087.984</b> | 20 | E | 2  | <b>304.162</b>  | 152.584         |
| 2331.062        | <b>1166.035</b> | 21 | R | 1  | 175.119         | 88.063          |

controllerType=0 controllerNumber=1 scan=13327

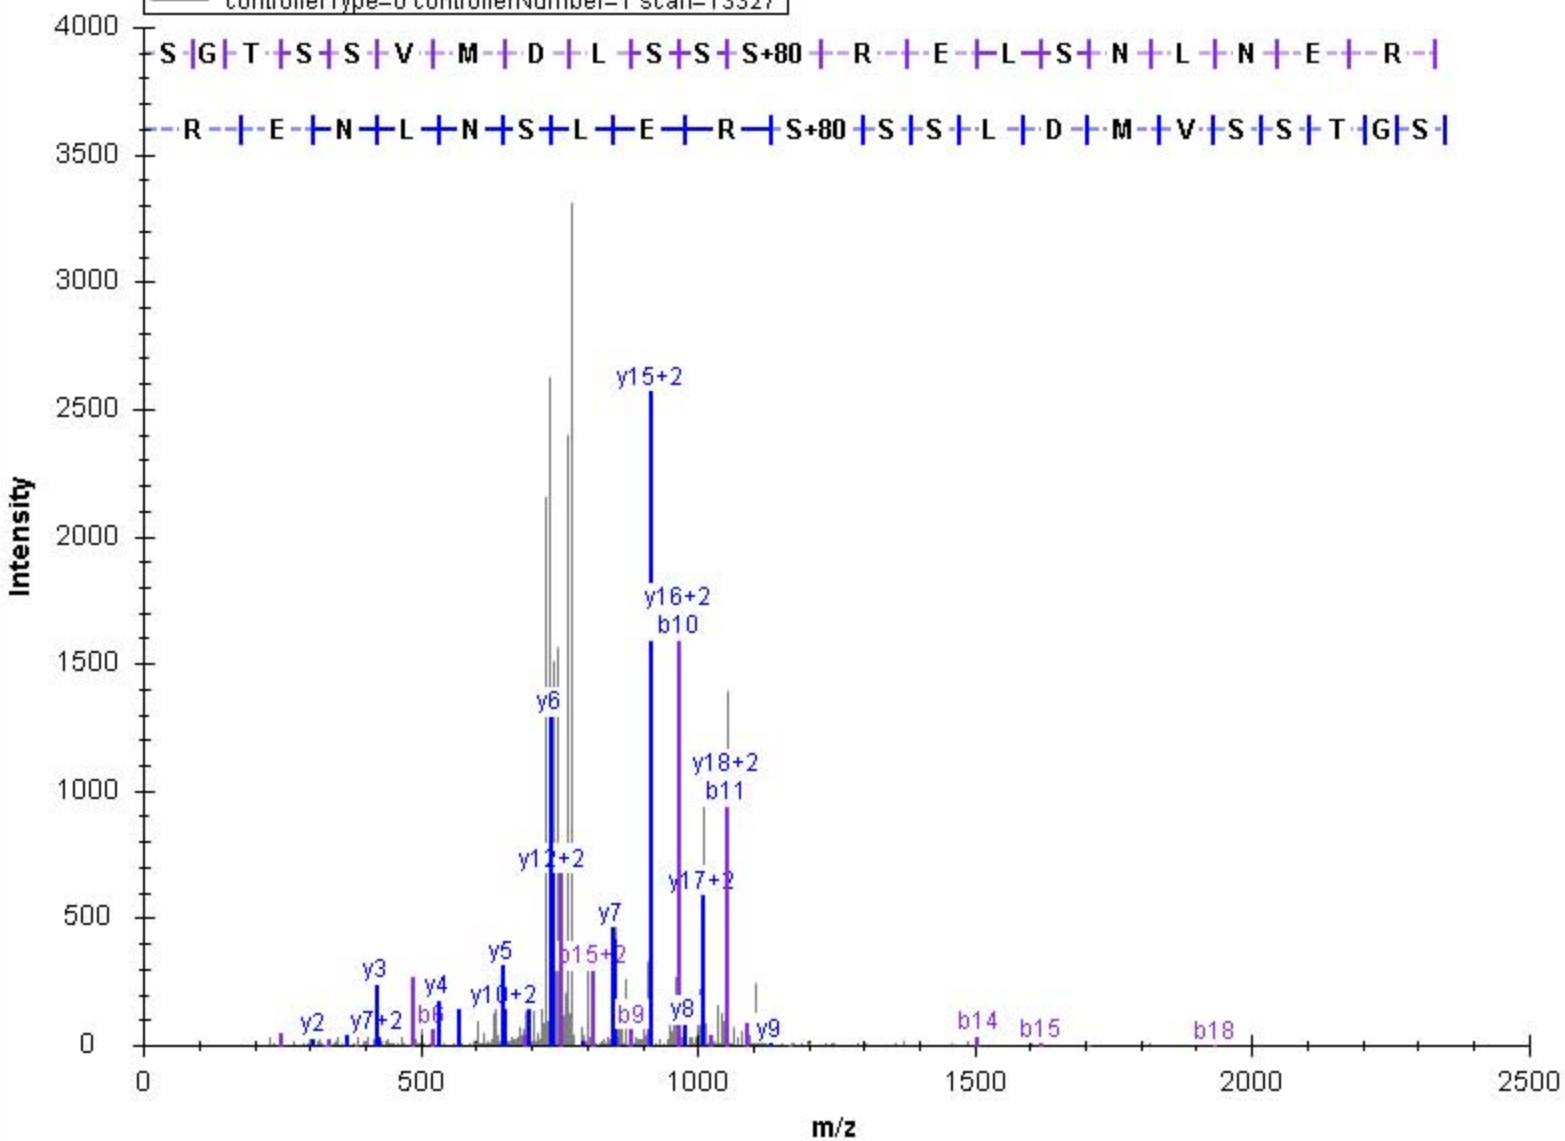

| b               | b(+2)           |    |   |    | y               | y(+2)           |
|-----------------|-----------------|----|---|----|-----------------|-----------------|
| <b>88.039</b>   | 44.523          | 1  | S | 21 | 2429.072        | <b>1215.040</b> |
| 145.061         | 73.034          | 2  | G | 20 | 2342.040        | 1171.524        |
| 246.108         | 123.558         | 3  | T | 19 | 2285.019        | 1143.013        |
| <b>413.140</b>  | 207.074         | 4  | S | 18 | 2183.971        | <b>1092.489</b> |
| <b>500.173</b>  | 250.590         | 5  | S | 17 | 2016.939        | <b>1008.973</b> |
| <b>599.241</b>  | 300.124         | 6  | V | 16 | 1929.907        | <b>965.457</b>  |
| <b>730.281</b>  | <b>365.644</b>  | 7  | M | 15 | 1830.839        | <b>915.923</b>  |
| <b>845.308</b>  | <b>423.158</b>  | 8  | D | 14 | 1699.798        | <b>850.403</b>  |
| <b>958.392</b>  | <b>479.700</b>  | 9  | L | 13 | 1584.771        | <b>792.889</b>  |
| <b>1045.424</b> | 523.216         | 10 | S | 12 | 1471.687        | <b>736.347</b>  |
| <b>1132.456</b> | <b>566.732</b>  | 11 | S | 11 | 1384.655        | <b>692.831</b>  |
| 1299.488        | 650.248         | 12 | S | 10 | 1297.623        | <b>649.315</b>  |
| <b>1455.590</b> | <b>728.298</b>  | 13 | R | 9  | <b>1130.591</b> | <b>565.799</b>  |
| 1584.632        | <b>792.820</b>  | 14 | E | 8  | <b>974.490</b>  | 487.749         |
| <b>1697.716</b> | <b>849.362</b>  | 15 | L | 7  | <b>845.448</b>  | <b>423.227</b>  |
| 1784.748        | <b>892.878</b>  | 16 | S | 6  | <b>732.363</b>  | 366.685         |
| 1898.791        | <b>949.899</b>  | 17 | N | 5  | <b>645.331</b>  | 323.169         |
| 2011.875        | <b>1006.441</b> | 18 | L | 4  | <b>531.289</b>  | 266.148         |
| 2125.918        | <b>1063.463</b> | 19 | N | 3  | <b>418.204</b>  | 209.606         |
| 2254.961        | <b>1127.984</b> | 20 | E | 2  | 304.162         | 152.584         |
| 2411.062        | 1206.035        | 21 | R | 1  | 175.119         | 88.063          |

controllerType=0 controllerNumber=1 scan=11008

S | G | T | S+80 | S | V | M | D | L | S | S | S+80 | R | E | L | S | N | L | N | E | R |  
R | E | N | L | N | S | L | E | R | S+80 | S | S | L | D | M | V | S | S+80 | T | G | S |

Intensity (10<sup>3</sup>)

12  
10  
8  
6  
4  
2  
0

0 500 1000 1500 2000 2500

m/z

y3 y4 y5 y6 y7 y8 y9  
b7 b8  
b14+2 y13+2  
y16+2 y17+2

b13

b15

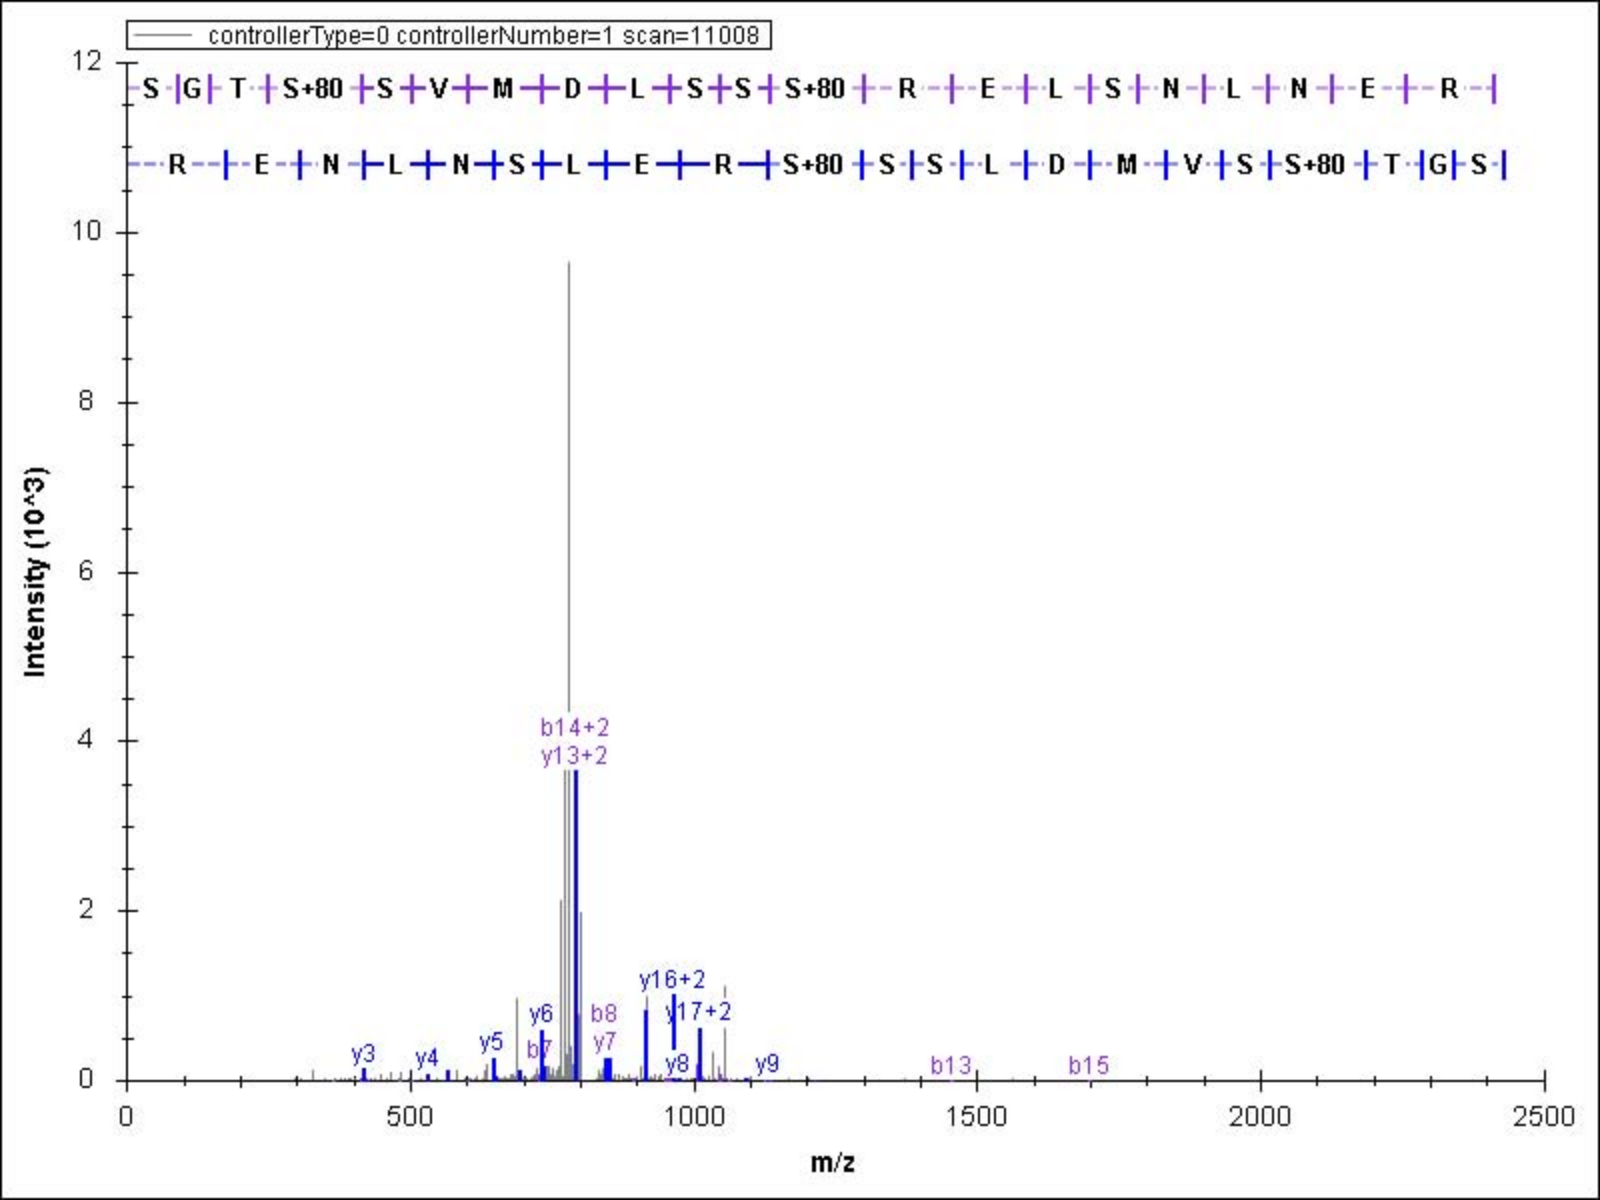



| b               | b(+2)           |    |   | y  | y(+2)           |                 |
|-----------------|-----------------|----|---|----|-----------------|-----------------|
| <b>88.039</b>   | 44.523          | 1  | S | 37 | 4023.011        | 2012.009        |
| 175.071         | 88.039          | 2  | S | 36 | 3935.979        | <b>1968.493</b> |
| 262.103         | 131.555         | 3  | S | 35 | 3848.947        | <b>1924.977</b> |
| 361.172         | 181.090         | 4  | V | 34 | 3761.915        | 1881.461        |
| <b>498.231</b>  | 249.619         | 5  | H | 33 | 3662.846        | <b>1831.927</b> |
| 595.283         | 298.145         | 6  | P | 32 | 3525.787        | <b>1763.397</b> |
| <b>682.315</b>  | 341.661         | 7  | S | 31 | 3428.734        | <b>1714.871</b> |
| 769.348         | 385.177         | 8  | S | 30 | 3341.702        | <b>1671.355</b> |
| <b>868.416</b>  | <b>434.712</b>  | 9  | V | 29 | 3254.670        | <b>1627.839</b> |
| <b>981.500</b>  | 491.254         | 10 | L | 28 | 3155.602        | <b>1578.305</b> |
| <b>1082.548</b> | <b>541.777</b>  | 11 | T | 27 | 3042.518        | <b>1521.763</b> |
| <b>1245.611</b> | 623.309         | 12 | Y | 26 | 2941.470        | <b>1471.239</b> |
| <b>1358.695</b> | 679.851         | 13 | L | 25 | 2778.407        | 1389.707        |
| <b>1429.732</b> | <b>715.370</b>  | 14 | A | 24 | 2665.323        | 1333.165        |
| <b>1542.816</b> | <b>771.912</b>  | 15 | L | 23 | 2594.286        | <b>1297.647</b> |
| <b>1655.900</b> | 828.454         | 16 | I | 22 | 2481.202        | <b>1241.104</b> |
| 1752.953        | <b>876.980</b>  | 17 | P | 21 | 2368.118        | <b>1184.562</b> |
| <b>1866.037</b> | 933.522         | 18 | L | 20 | 2271.065        | <b>1136.036</b> |
| 1967.085        | 984.046         | 19 | T | 19 | 2157.981        | <b>1079.494</b> |
| 2080.169        | <b>1040.588</b> | 20 | L | 18 | 2056.933        | <b>1028.970</b> |
| 2195.196        | 1098.102        | 21 | D | 17 | 1943.849        | 972.428         |
| 2323.254        | 1162.131        | 22 | Q | 16 | <b>1828.822</b> | <b>914.915</b>  |
| 2422.323        | <b>1211.665</b> | 23 | V | 15 | <b>1700.764</b> | <b>850.885</b>  |
| 2550.418        | <b>1275.713</b> | 24 | K | 14 | <b>1601.695</b> | <b>801.351</b>  |
| 2717.450        | <b>1359.229</b> | 25 | S | 13 | <b>1473.600</b> | 737.304         |
| 2774.471        | 1387.739        | 26 | G | 12 | 1306.568        | <b>653.788</b>  |
| 2875.519        | <b>1438.263</b> | 27 | T | 11 | <b>1249.547</b> | 625.277         |
| 3042.551        | <b>1521.779</b> | 28 | S | 10 | <b>1148.499</b> | <b>574.753</b>  |
| 3129.583        | <b>1565.295</b> | 29 | S | 9  | <b>981.467</b>  | 491.237         |
| 3228.651        | <b>1614.829</b> | 30 | V | 8  | <b>894.435</b>  | 447.721         |
| 3359.692        | <b>1680.350</b> | 31 | M | 7  | <b>795.367</b>  | 398.187         |
| 3474.719        | <b>1737.863</b> | 32 | D | 6  | <b>664.326</b>  | 332.667         |

controllerType=0 controllerNumber=1 scan=16537

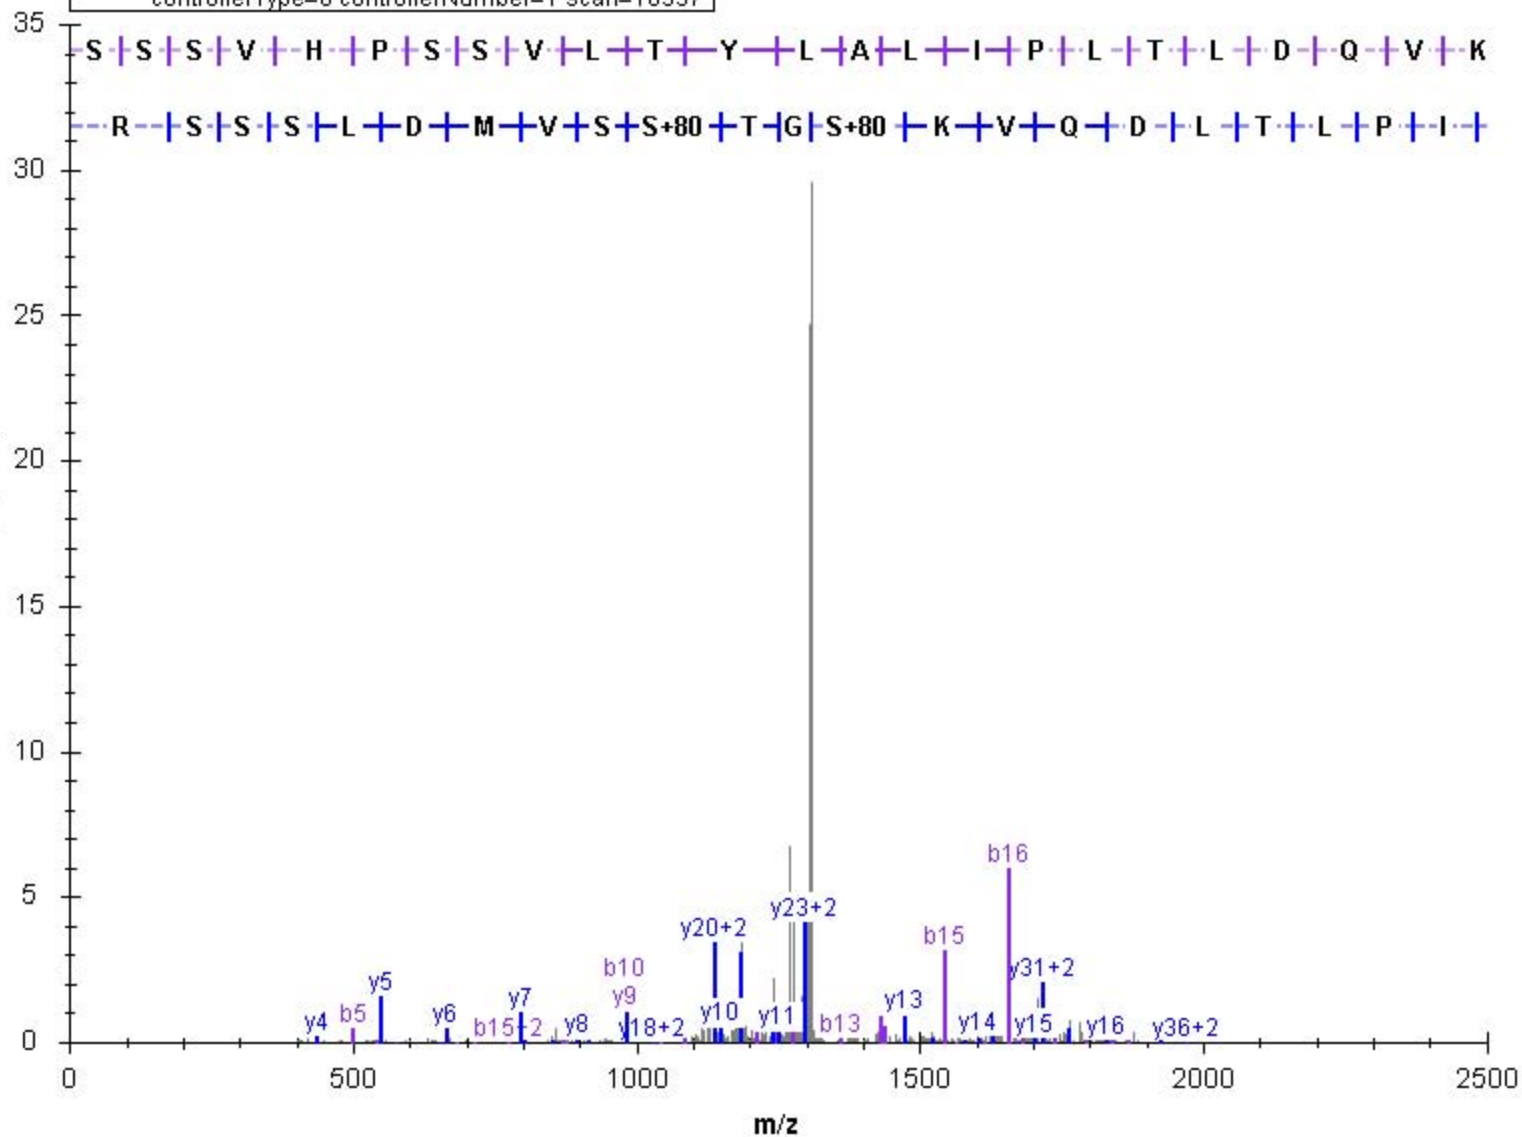

| b               | b(+2)          |    |   |    | y               | y(+2)          |
|-----------------|----------------|----|---|----|-----------------|----------------|
| 115.050         | 58.029         | 1  | N | 15 | 1717.744        | 859.375        |
| 246.091         | 123.549        | 2  | M | 14 | 1603.701        | <b>802.354</b> |
| <b>303.112</b>  | 152.060        | 3  | G | 13 | <b>1472.660</b> | <b>736.834</b> |
| <b>402.181</b>  | 201.594        | 4  | V | 12 | <b>1415.639</b> | <b>708.323</b> |
| <b>489.213</b>  | 245.110        | 5  | S | 11 | <b>1316.570</b> | <b>658.789</b> |
| 618.255         | 309.631        | 6  | E | 10 | <b>1229.538</b> | 615.273        |
| <b>785.287</b>  | 393.147        | 7  | S | 9  | <b>1100.496</b> | 550.751        |
| <b>900.314</b>  | <b>450.661</b> | 8  | D | 8  | <b>933.464</b>  | 467.235        |
| <b>971.351</b>  | 486.179        | 9  | A | 7  | <b>818.437</b>  | <b>409.722</b> |
| <b>1099.446</b> | 550.227        | 10 | K | 6  | <b>747.400</b>  | <b>374.203</b> |
| <b>1214.473</b> | 607.740        | 11 | D | 5  | <b>619.305</b>  | 310.156        |
| <b>1301.505</b> | 651.256        | 12 | S | 4  | <b>504.278</b>  | <b>252.642</b> |
| <b>1414.589</b> | 707.798        | 13 | L | 3  | <b>417.246</b>  | 209.126        |
| <b>1543.632</b> | 772.320        | 14 | E | 2  | <b>304.162</b>  | 152.584        |
| 1699.733        | 850.370        | 15 | R | 1  | 175.119         | 88.063         |

controllerType=0 controllerNumber=1 scan=11495

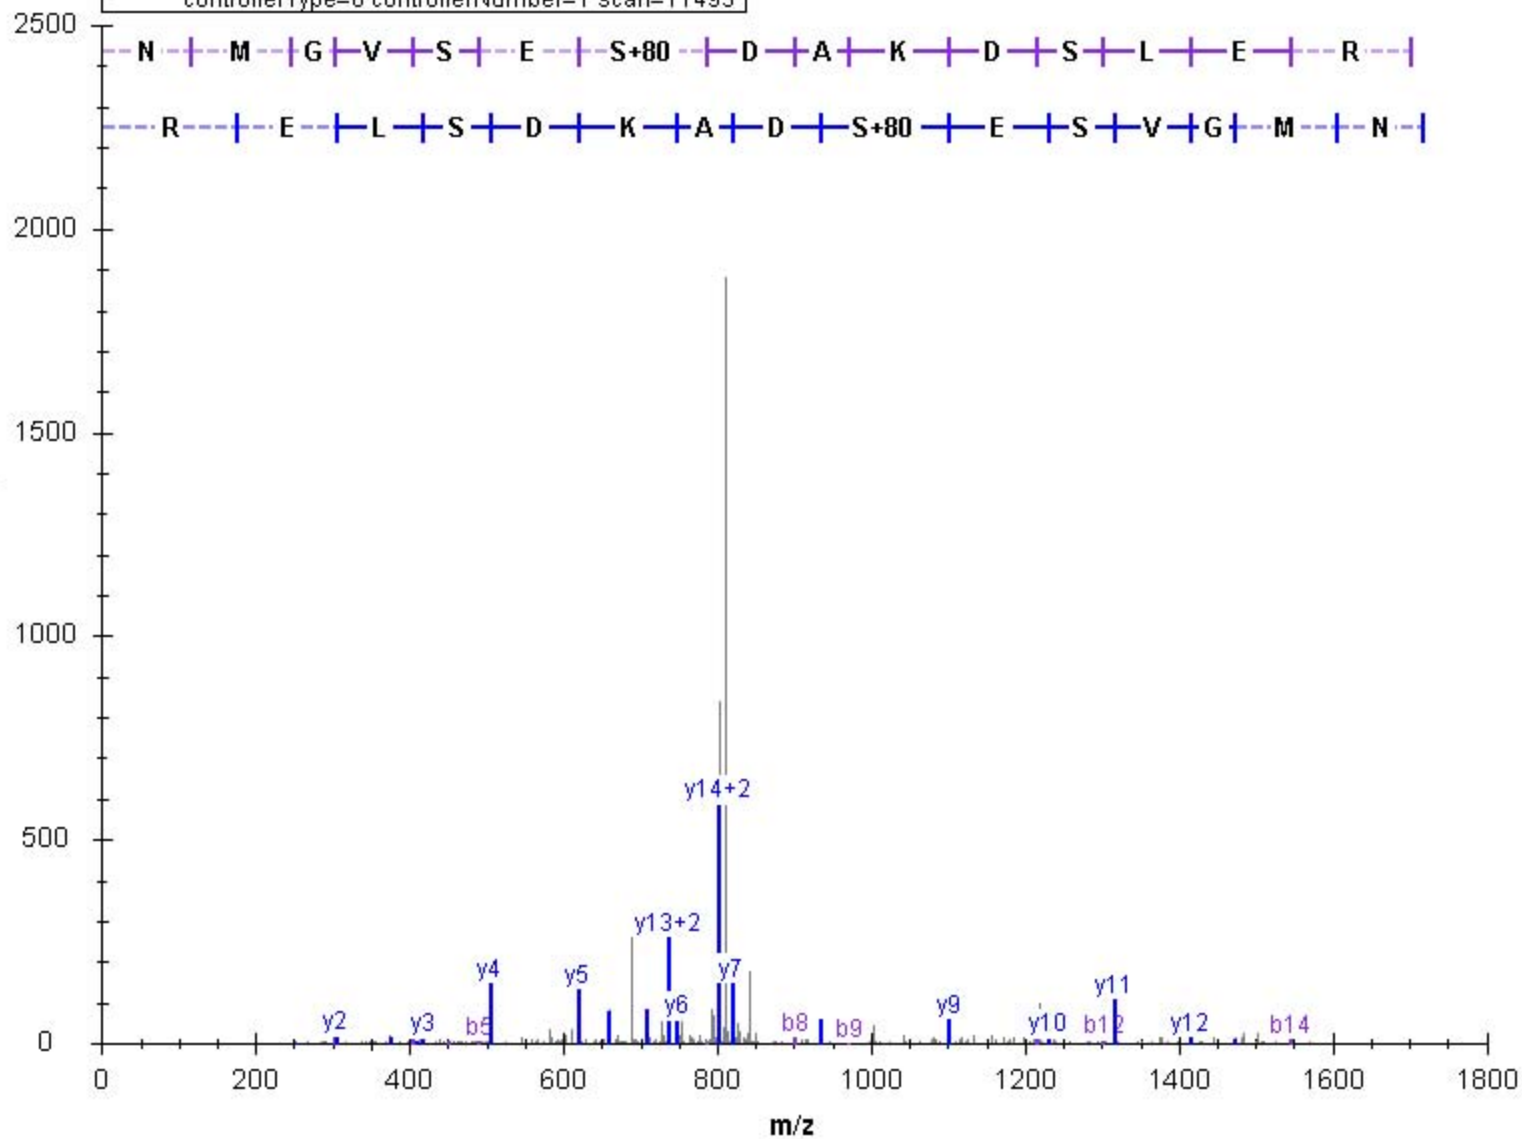

| b               | b(+2)           |    |   | y  | y(+2)           |                 |
|-----------------|-----------------|----|---|----|-----------------|-----------------|
| <b>58.029</b>   | 29.518          | 1  | G | 29 | 3200.539        | <b>1600.773</b> |
| 171.113         | 86.060          | 2  | L | 28 | 3143.517        | 1572.262        |
| 284.197         | 142.602         | 3  | L | 27 | 3030.433        | <b>1515.720</b> |
| <b>431.265</b>  | 216.136         | 4  | F | 26 | 2917.349        | <b>1459.178</b> |
| <b>502.302</b>  | 251.655         | 5  | A | 25 | 2770.280        | 1385.644        |
| <b>631.345</b>  | 316.176         | 6  | E | 24 | 2699.243        | <b>1350.125</b> |
| <b>746.372</b>  | 373.690         | 7  | D | 23 | 2570.201        | 1285.604        |
| <b>860.415</b>  | 430.711         | 8  | N | 22 | 2455.174        | <b>1228.091</b> |
| <b>931.452</b>  | <b>466.230</b>  | 9  | A | 21 | 2341.131        | <b>1171.069</b> |
| <b>1018.484</b> | 509.746         | 10 | S | 20 | 2270.094        | 1135.551        |
| <b>1165.552</b> | 583.280         | 11 | F | 19 | 2183.062        | 1092.035        |
| <b>1302.611</b> | 651.809         | 12 | H | 18 | 2035.993        | <b>1018.500</b> |
| <b>1458.712</b> | <b>729.860</b>  | 13 | R | 17 | 1898.934        | <b>949.971</b>  |
| 1555.765        | 778.386         | 14 | P | 16 | <b>1742.833</b> | <b>871.920</b>  |
| <b>1702.834</b> | <b>851.920</b>  | 15 | F | 15 | <b>1645.781</b> | <b>823.394</b>  |
| <b>1803.881</b> | <b>902.444</b>  | 16 | T | 14 | <b>1498.712</b> | 749.860         |
| <b>1918.908</b> | <b>959.958</b>  | 17 | D | 13 | <b>1397.664</b> | <b>699.336</b>  |
| 2017.977        | 1009.492        | 18 | V | 12 | <b>1282.638</b> | <b>641.822</b>  |
| 2105.009        | <b>1053.008</b> | 19 | S | 11 | <b>1183.569</b> | 592.288         |
| 2176.046        | 1088.527        | 20 | A | 10 | <b>1096.537</b> | <b>548.772</b>  |
| 2313.105        | <b>1157.056</b> | 21 | H | 9  | <b>1025.500</b> | 513.254         |
| 2426.189        | <b>1213.598</b> | 22 | L | 8  | <b>888.441</b>  | 444.724         |
| 2593.221        | 1297.114        | 23 | S | 7  | <b>775.357</b>  | 388.182         |
| 2680.253        | 1340.630        | 24 | S | 6  | <b>608.325</b>  | 304.666         |
| 2767.285        | 1384.146        | 25 | S | 5  | <b>521.293</b>  | 261.150         |
| 2854.317        | <b>1427.662</b> | 26 | S | 4  | <b>434.261</b>  | 217.634         |
| 2967.401        | <b>1484.204</b> | 27 | L | 3  | <b>347.229</b>  | 174.118         |
| 3054.433        | 1527.720        | 28 | S | 2  | 234.145         | 117.576         |
| 3182.528        | 1591.768        | 29 | K | 1  | 147.113         | 74.060          |

controllerType=0 controllerNumber=1 scan=12648

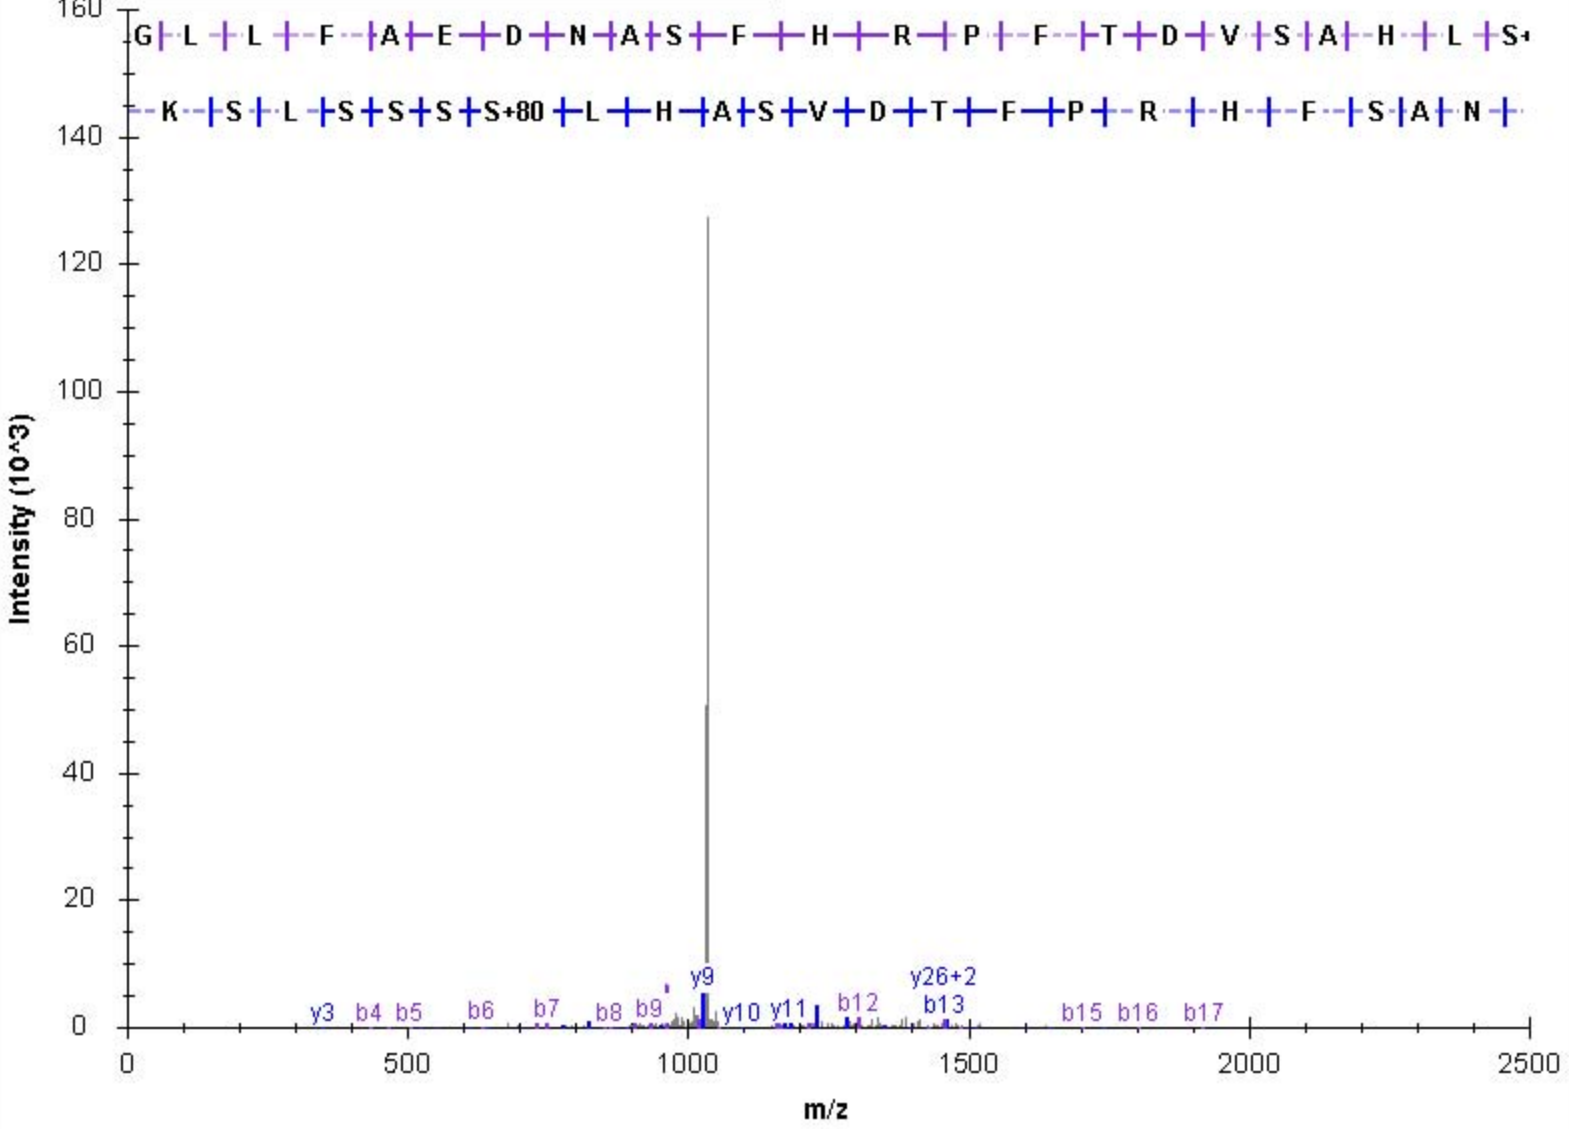

| b               | b(+2)           |    |   | y  | y(+2)           |                 |
|-----------------|-----------------|----|---|----|-----------------|-----------------|
| <b>58.029</b>   | 29.518          | 1  | G | 29 | 3280.539        | <b>1640.773</b> |
| 171.113         | 86.060          | 2  | L | 28 | 3223.517        | 1612.262        |
| 284.197         | 142.602         | 3  | L | 27 | 3110.433        | <b>1555.720</b> |
| <b>431.265</b>  | 216.136         | 4  | F | 26 | 2997.349        | <b>1499.178</b> |
| <b>502.302</b>  | 251.655         | 5  | A | 25 | 2850.280        | <b>1425.644</b> |
| <b>631.345</b>  | 316.176         | 6  | E | 24 | 2779.243        | <b>1390.125</b> |
| <b>746.372</b>  | 373.690         | 7  | D | 23 | 2650.201        | <b>1325.604</b> |
| 860.415         | <b>430.711</b>  | 8  | N | 22 | 2535.174        | <b>1268.091</b> |
| <b>931.452</b>  | <b>466.230</b>  | 9  | A | 21 | 2421.131        | <b>1211.069</b> |
| <b>1018.484</b> | 509.746         | 10 | S | 20 | 2350.094        | <b>1175.551</b> |
| <b>1165.552</b> | <b>583.280</b>  | 11 | F | 19 | 2263.062        | <b>1132.035</b> |
| <b>1302.611</b> | 651.809         | 12 | H | 18 | 2115.993        | <b>1058.500</b> |
| <b>1458.712</b> | <b>729.860</b>  | 13 | R | 17 | 1978.934        | <b>989.971</b>  |
| <b>1555.765</b> | 778.386         | 14 | P | 16 | <b>1822.833</b> | <b>911.920</b>  |
| <b>1702.834</b> | <b>851.920</b>  | 15 | F | 15 | <b>1725.781</b> | <b>863.394</b>  |
| 1803.881        | <b>902.444</b>  | 16 | T | 14 | <b>1578.712</b> | 789.860         |
| <b>1918.908</b> | <b>959.958</b>  | 17 | D | 13 | <b>1477.664</b> | <b>739.336</b>  |
| 2017.977        | 1009.492        | 18 | V | 12 | <b>1362.638</b> | <b>681.822</b>  |
| 2105.009        | <b>1053.008</b> | 19 | S | 11 | <b>1263.569</b> | <b>632.288</b>  |
| 2176.046        | 1088.527        | 20 | A | 10 | <b>1176.537</b> | <b>588.772</b>  |
| 2313.105        | <b>1157.056</b> | 21 | H | 9  | 1105.500        | 553.254         |
| 2426.189        | <b>1213.598</b> | 22 | L | 8  | 968.441         | <b>484.724</b>  |
| 2593.221        | <b>1297.114</b> | 23 | S | 7  | <b>855.357</b>  | <b>428.182</b>  |
| 2760.253        | <b>1380.630</b> | 24 | S | 6  | <b>688.325</b>  | <b>344.666</b>  |
| 2847.285        | 1424.146        | 25 | S | 5  | <b>521.293</b>  | 261.150         |
| 2934.317        | <b>1467.662</b> | 26 | S | 4  | 434.261         | 217.634         |
| 3047.401        | 1524.204        | 27 | L | 3  | <b>347.229</b>  | 174.118         |
| 3134.433        | <b>1567.720</b> | 28 | S | 2  | 234.145         | 117.576         |
| 3262.528        | 1631.768        | 29 | K | 1  | 147.113         | 74.060          |

controllerType=0 controllerNumber=1 scan=13030

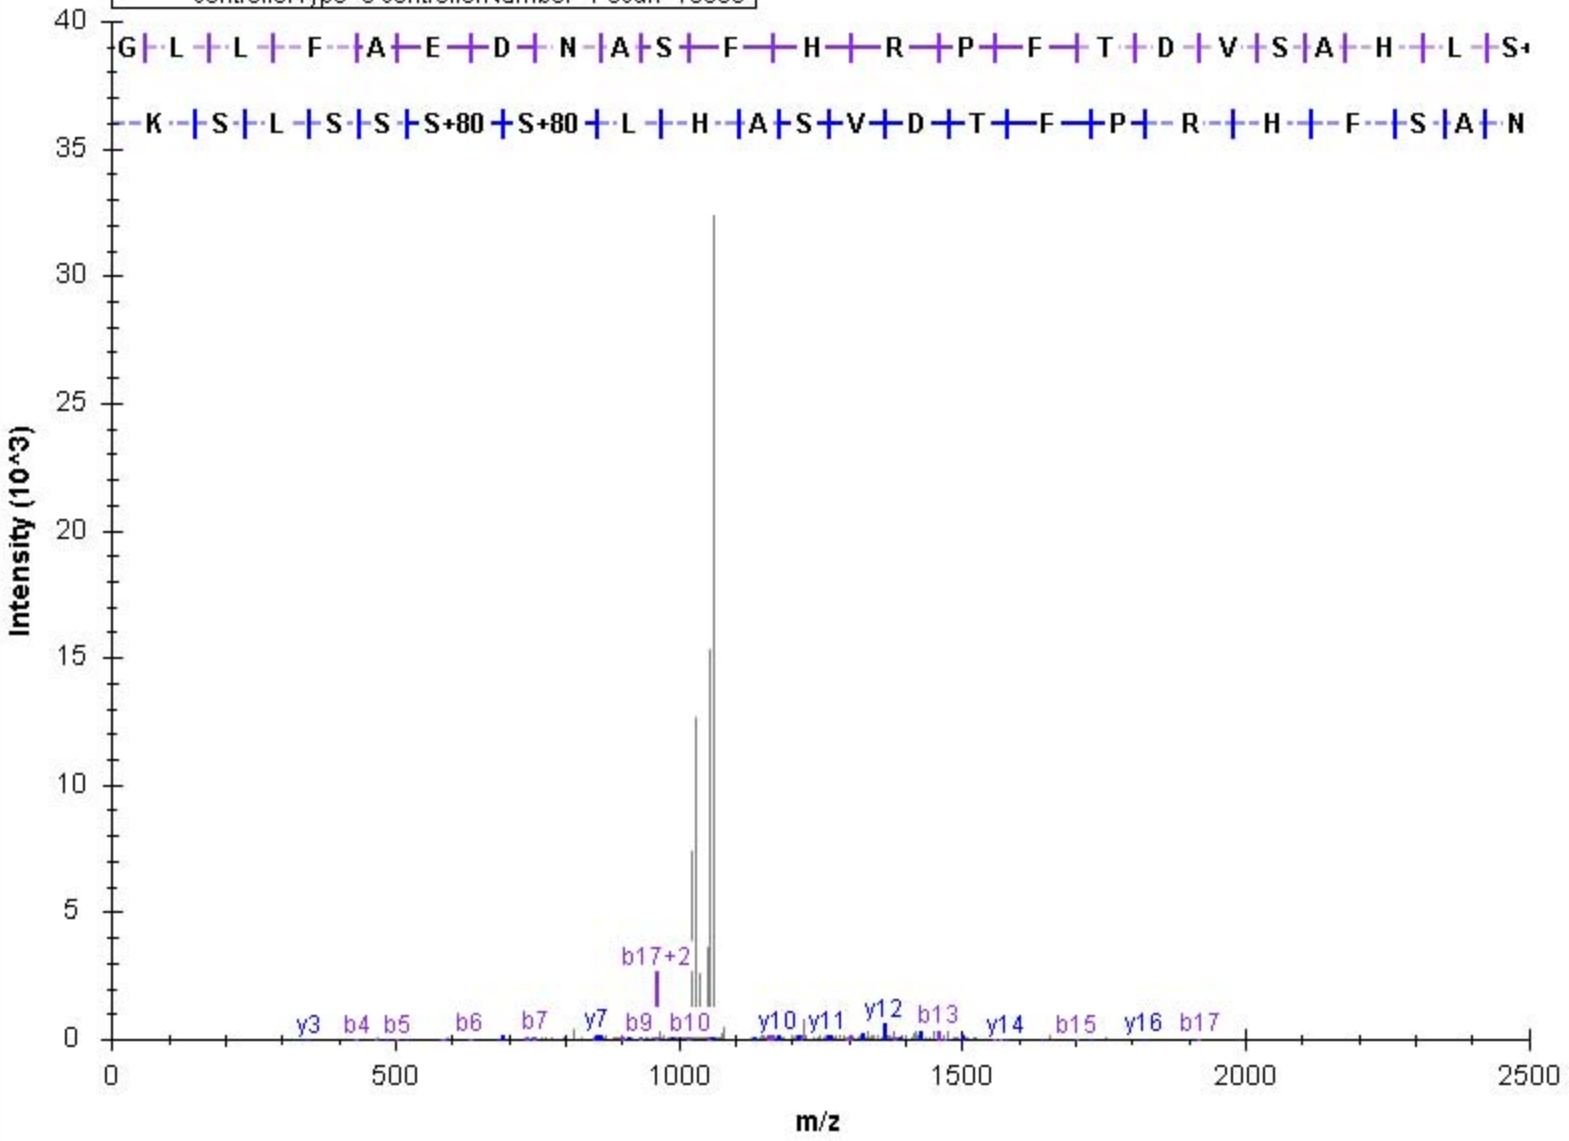



| b               | b(+2)          |    |   |    | y               | y(+2)          |
|-----------------|----------------|----|---|----|-----------------|----------------|
| <b>98.060</b>   | 49.534         | 1  | P | 16 | 1742.833        | 871.920        |
| 245.128         | 123.068        | 2  | F | 15 | 1645.781        | <b>823.394</b> |
| <b>346.176</b>  | 173.592        | 3  | T | 14 | <b>1498.712</b> | <b>749.860</b> |
| <b>461.203</b>  | 231.105        | 4  | D | 13 | <b>1397.664</b> | <b>699.336</b> |
| <b>560.271</b>  | 280.639        | 5  | V | 12 | <b>1282.638</b> | 641.822        |
| <b>647.304</b>  | <b>324.155</b> | 6  | S | 11 | <b>1183.569</b> | 592.288        |
| <b>718.341</b>  | 359.674        | 7  | A | 10 | <b>1096.537</b> | <b>548.772</b> |
| 855.400         | <b>428.203</b> | 8  | H | 9  | <b>1025.500</b> | <b>513.254</b> |
| <b>968.484</b>  | <b>484.745</b> | 9  | L | 8  | <b>888.441</b>  | <b>444.724</b> |
| <b>1055.516</b> | 528.261        | 10 | S | 7  | <b>775.357</b>  | 388.182        |
| <b>1142.548</b> | 571.777        | 11 | S | 6  | <b>688.325</b>  | 344.666        |
| <b>1229.580</b> | 615.293        | 12 | S | 5  | <b>601.293</b>  | 301.150        |
| <b>1396.612</b> | <b>698.809</b> | 13 | S | 4  | <b>514.261</b>  | 257.634        |
| <b>1509.696</b> | <b>755.352</b> | 14 | L | 3  | <b>347.229</b>  | 174.118        |
| <b>1596.728</b> | <b>798.868</b> | 15 | S | 2  | 234.145         | 117.576        |
| 1724.823        | <b>862.915</b> | 16 | K | 1  | 147.113         | 74.060         |

controllerType=0 controllerNumber=1 scan=9550

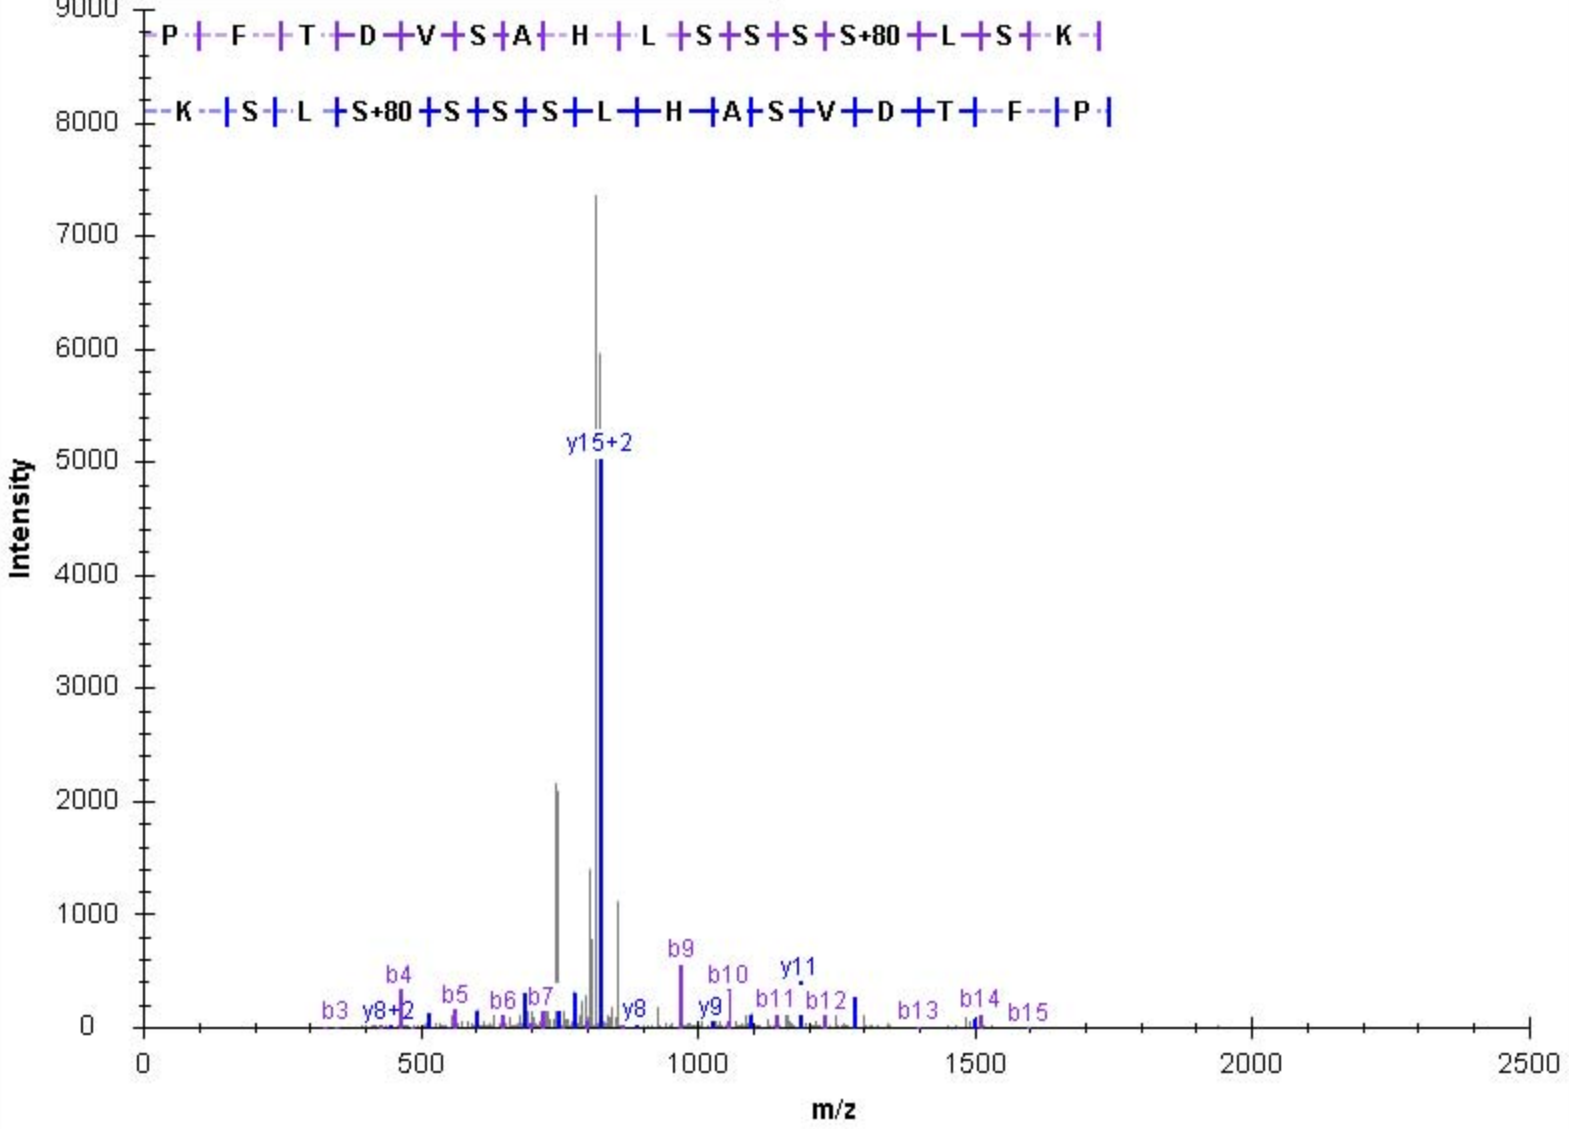

| b               | b(+2)           |    |   | y  | y(+2)           |                 |
|-----------------|-----------------|----|---|----|-----------------|-----------------|
| <b>114.091</b>  | 57.549          | 1  | L | 27 | 3021.502        | 1511.254        |
| 213.160         | 107.084         | 2  | V | 26 | 2908.418        | 1454.712        |
| 310.213         | 155.610         | 3  | P | 25 | 2809.349        | <b>1405.178</b> |
| <b>423.297</b>  | 212.152         | 4  | I | 24 | 2712.296        | <b>1356.652</b> |
| <b>554.337</b>  | 277.672         | 5  | M | 23 | 2599.212        | <b>1300.110</b> |
| <b>721.369</b>  | 361.188         | 6  | S | 22 | 2468.172        | <b>1234.590</b> |
| 808.401         | 404.704         | 7  | S | 21 | 2301.140        | <b>1151.074</b> |
| <b>909.449</b>  | 455.228         | 8  | T | 20 | 2214.108        | <b>1107.558</b> |
| <b>996.481</b>  | 498.744         | 9  | S | 19 | 2113.060        | <b>1057.034</b> |
| <b>1109.565</b> | <b>555.286</b>  | 10 | I | 18 | 2026.028        | 1013.518        |
| <b>1180.602</b> | <b>590.805</b>  | 11 | A | 17 | 1912.944        | <b>956.976</b>  |
| <b>1267.634</b> | <b>634.321</b>  | 12 | S | 16 | 1841.907        | <b>921.457</b>  |
| <b>1354.666</b> | 677.837         | 13 | S | 15 | <b>1754.875</b> | <b>877.941</b>  |
| <b>1467.750</b> | <b>734.379</b>  | 14 | L | 14 | <b>1667.843</b> | <b>834.425</b>  |
| <b>1564.803</b> | 782.905         | 15 | P | 13 | <b>1554.759</b> | <b>777.883</b>  |
| <b>1651.835</b> | <b>826.421</b>  | 16 | S | 12 | <b>1457.706</b> | 729.357         |
| <b>1814.898</b> | 907.953         | 17 | Y | 11 | <b>1370.674</b> | <b>685.841</b>  |
| 1942.957        | <b>971.982</b>  | 18 | Q | 10 | <b>1207.611</b> | 604.309         |
| 2057.984        | <b>1029.496</b> | 19 | D | 9  | <b>1079.552</b> | 540.280         |
| 2159.031        | <b>1080.019</b> | 20 | T | 8  | <b>964.525</b>  | 482.766         |
| 2306.100        | <b>1153.554</b> | 21 | F | 7  | <b>863.477</b>  | 432.242         |
| 2453.168        | <b>1227.088</b> | 22 | F | 6  | <b>716.409</b>  | 358.708         |
| 2566.252        | <b>1283.630</b> | 23 | L | 5  | <b>569.341</b>  | 285.174         |
| 2663.305        | <b>1332.156</b> | 24 | P | 4  | <b>456.257</b>  | 228.632         |
| 2750.337        | <b>1375.672</b> | 25 | S | 3  | 359.204         | 180.106         |
| 2847.390        | <b>1424.199</b> | 26 | P | 2  | 272.172         | 136.589         |
| 3003.491        | 1502.249        | 27 | R | 1  | 175.119         | 88.063          |

controllerType=0 controllerNumber=1 scan=12

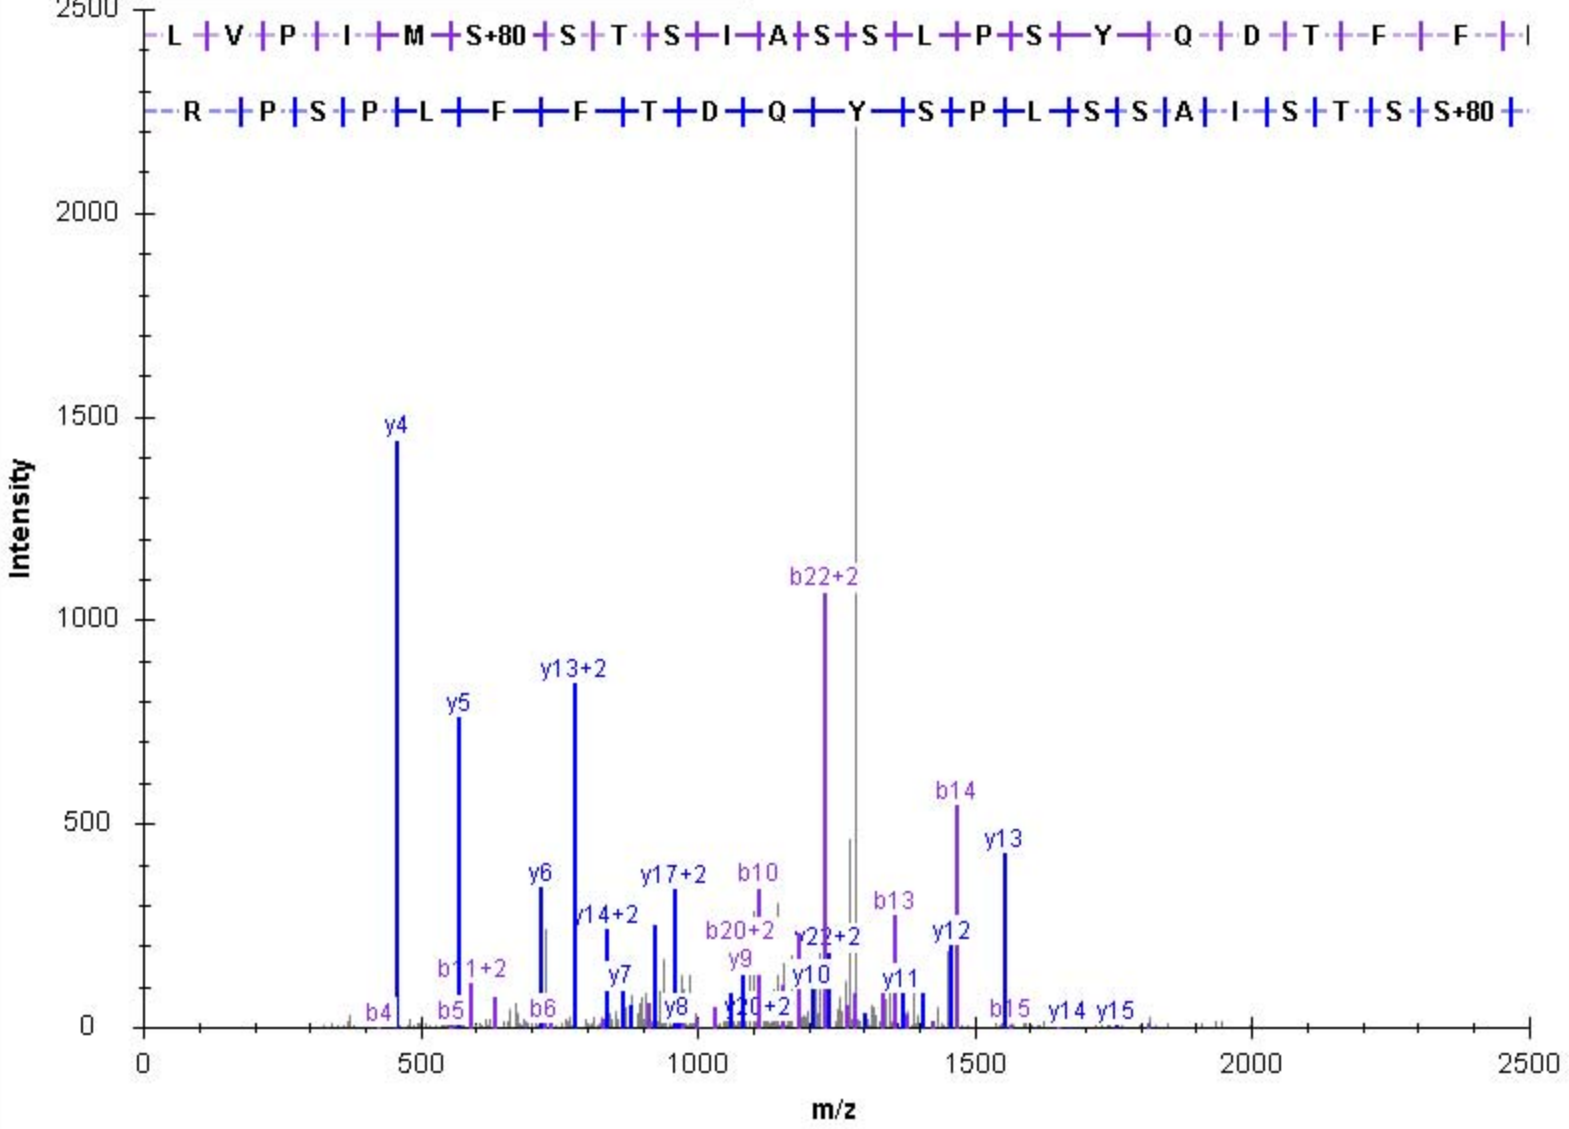

| b               | b(+2)           |    |   | y  | y(+2)           |                 |
|-----------------|-----------------|----|---|----|-----------------|-----------------|
| <b>114.091</b>  | 57.549          | 1  | L | 27 | 3101.502        | <b>1551.254</b> |
| 213.160         | 107.084         | 2  | V | 26 | 2988.418        | <b>1494.712</b> |
| <b>310.213</b>  | 155.610         | 3  | P | 25 | 2889.349        | <b>1445.178</b> |
| <b>423.297</b>  | 212.152         | 4  | I | 24 | 2792.296        | <b>1396.652</b> |
| <b>554.337</b>  | 277.672         | 5  | M | 23 | 2679.212        | <b>1340.110</b> |
| 641.369         | 321.188         | 6  | S | 22 | 2548.172        | <b>1274.590</b> |
| <b>728.401</b>  | 364.704         | 7  | S | 21 | 2461.140        | <b>1231.074</b> |
| <b>829.449</b>  | 415.228         | 8  | T | 20 | 2374.108        | <b>1187.558</b> |
| <b>916.481</b>  | 458.744         | 9  | S | 19 | 2273.060        | <b>1137.034</b> |
| 1029.565        | <b>515.286</b>  | 10 | I | 18 | 2186.028        | <b>1093.518</b> |
| <b>1100.602</b> | <b>550.805</b>  | 11 | A | 17 | 2072.944        | 1036.976        |
| <b>1187.634</b> | 594.321         | 12 | S | 16 | 2001.907        | <b>1001.457</b> |
| <b>1354.666</b> | 677.837         | 13 | S | 15 | <b>1914.875</b> | <b>957.941</b>  |
| <b>1467.750</b> | <b>734.379</b>  | 14 | L | 14 | 1747.843        | <b>874.425</b>  |
| 1564.803        | <b>782.905</b>  | 15 | P | 13 | <b>1634.759</b> | <b>817.883</b>  |
| <b>1651.835</b> | 826.421         | 16 | S | 12 | <b>1537.706</b> | <b>769.357</b>  |
| <b>1894.898</b> | <b>947.953</b>  | 17 | Y | 11 | <b>1450.674</b> | <b>725.841</b>  |
| 2022.957        | <b>1011.982</b> | 18 | Q | 10 | <b>1207.611</b> | <b>604.309</b>  |
| 2137.984        | <b>1069.496</b> | 19 | D | 9  | <b>1079.552</b> | 540.280         |
| 2239.031        | <b>1120.019</b> | 20 | T | 8  | <b>964.525</b>  | 482.766         |
| 2386.100        | <b>1193.554</b> | 21 | F | 7  | <b>863.477</b>  | 432.242         |
| 2533.168        | <b>1267.088</b> | 22 | F | 6  | <b>716.409</b>  | <b>358.708</b>  |
| 2646.252        | <b>1323.630</b> | 23 | L | 5  | <b>569.341</b>  | 285.174         |
| 2743.305        | <b>1372.156</b> | 24 | P | 4  | <b>456.257</b>  | 228.632         |
| 2830.337        | <b>1415.672</b> | 25 | S | 3  | <b>359.204</b>  | 180.106         |
| 2927.390        | <b>1464.199</b> | 26 | P | 2  | 272.172         | 136.589         |
| 3083.491        | 1542.249        | 27 | R | 1  | 175.119         | 88.063          |

controllerType=0 controllerNumber=1 scan=144

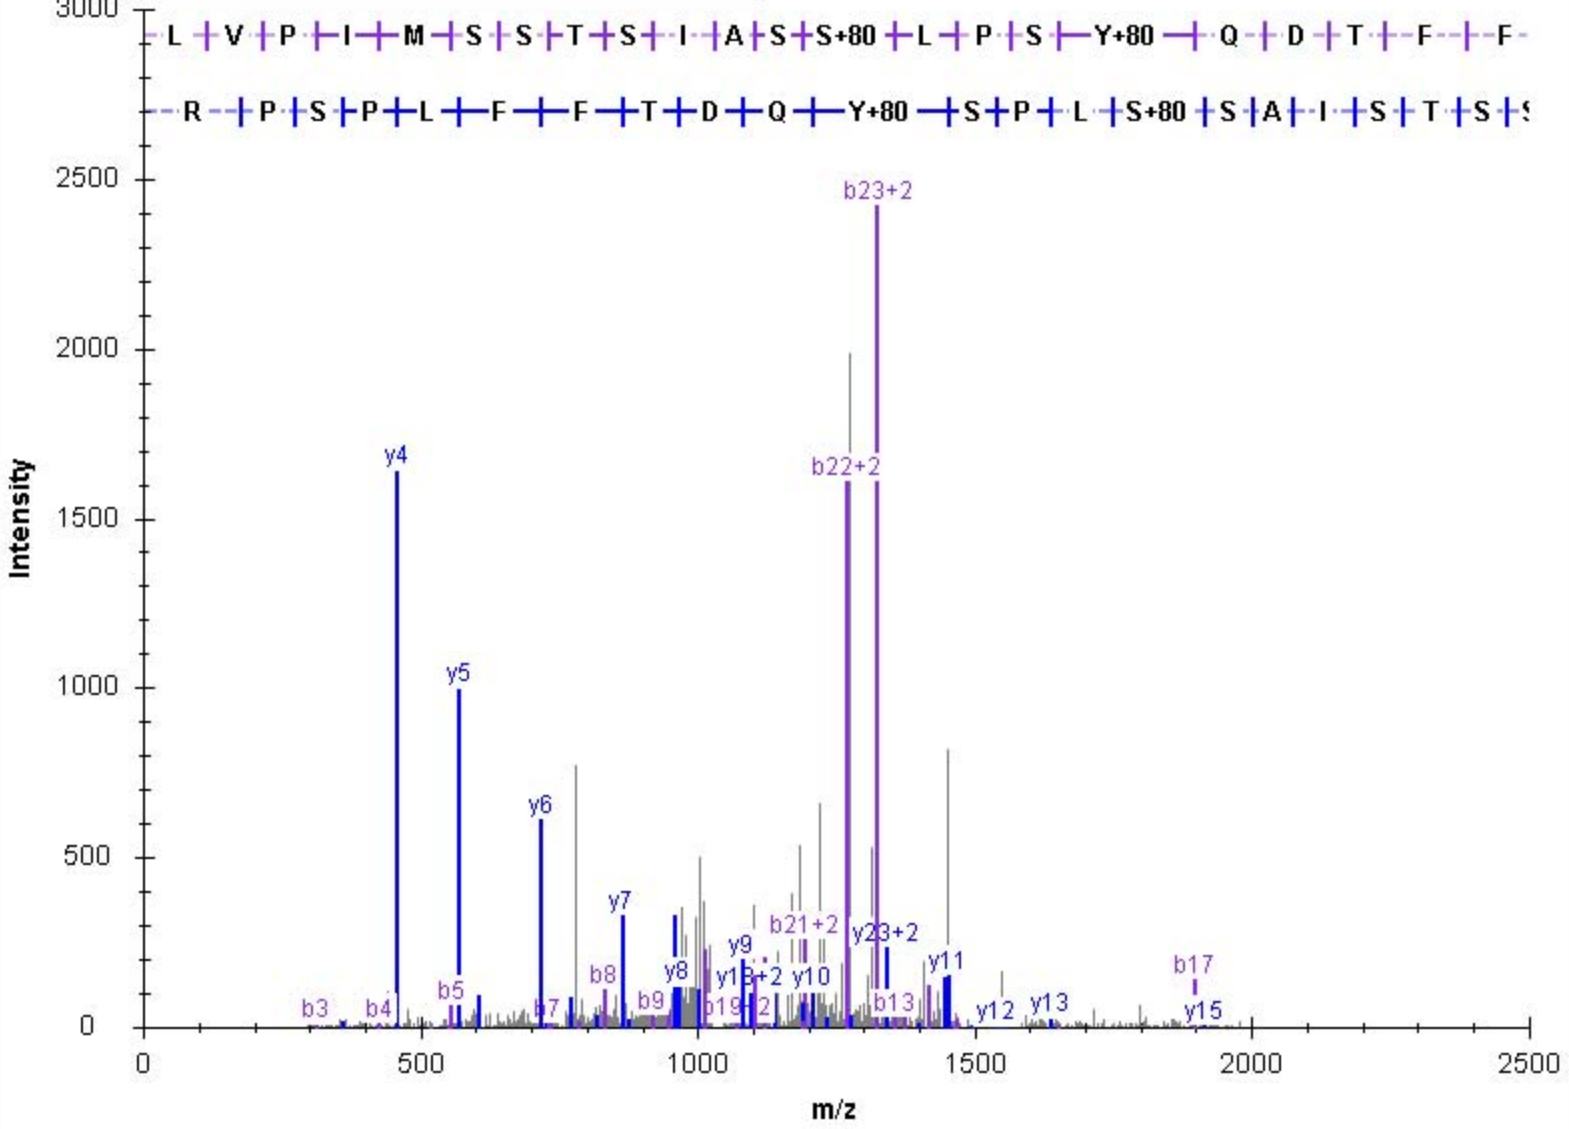

| b               | b(+2)          |    |   |    | y               | y(+2)          |
|-----------------|----------------|----|---|----|-----------------|----------------|
| <b>115.050</b>  | 58.029         | 1  | N | 16 | 1993.925        | 997.466        |
| <b>214.119</b>  | 107.563        | 2  | V | 15 | 1879.882        | <b>940.445</b> |
| <b>381.151</b>  | 191.079        | 3  | S | 14 | 1780.814        | <b>890.911</b> |
| <b>478.203</b>  | 239.605        | 4  | P | 13 | 1613.782        | <b>807.395</b> |
| <b>565.235</b>  | <b>283.121</b> | 5  | S | 12 | 1516.729        | <b>758.868</b> |
| 636.273         | 318.640        | 6  | A | 11 | <b>1429.697</b> | <b>715.352</b> |
| <b>750.315</b>  | 375.661        | 7  | N | 10 | <b>1358.660</b> | <b>679.834</b> |
| 887.374         | <b>444.191</b> | 8  | H | 9  | <b>1244.617</b> | 622.812        |
| <b>1001.417</b> | <b>501.212</b> | 9  | N | 8  | <b>1107.558</b> | <b>554.283</b> |
| <b>1130.460</b> | <b>565.734</b> | 10 | E | 7  | <b>993.515</b>  | 497.261        |
| <b>1258.518</b> | <b>629.763</b> | 11 | Q | 6  | <b>864.473</b>  | <b>432.740</b> |
| 1444.598        | <b>722.803</b> | 12 | W | 5  | <b>736.414</b>  | <b>368.711</b> |
| <b>1607.661</b> | <b>804.334</b> | 13 | Y | 4  | <b>550.335</b>  | <b>275.671</b> |
| 1720.745        | <b>860.876</b> | 14 | L | 3  | <b>387.271</b>  | 194.139        |
| 1819.814        | <b>910.410</b> | 15 | V | 2  | <b>274.187</b>  | 137.597        |
| 1975.915        | <b>988.461</b> | 16 | R | 1  | 175.119         | 88.063         |

controllerType=0 controllerNumber=1 scan=12968

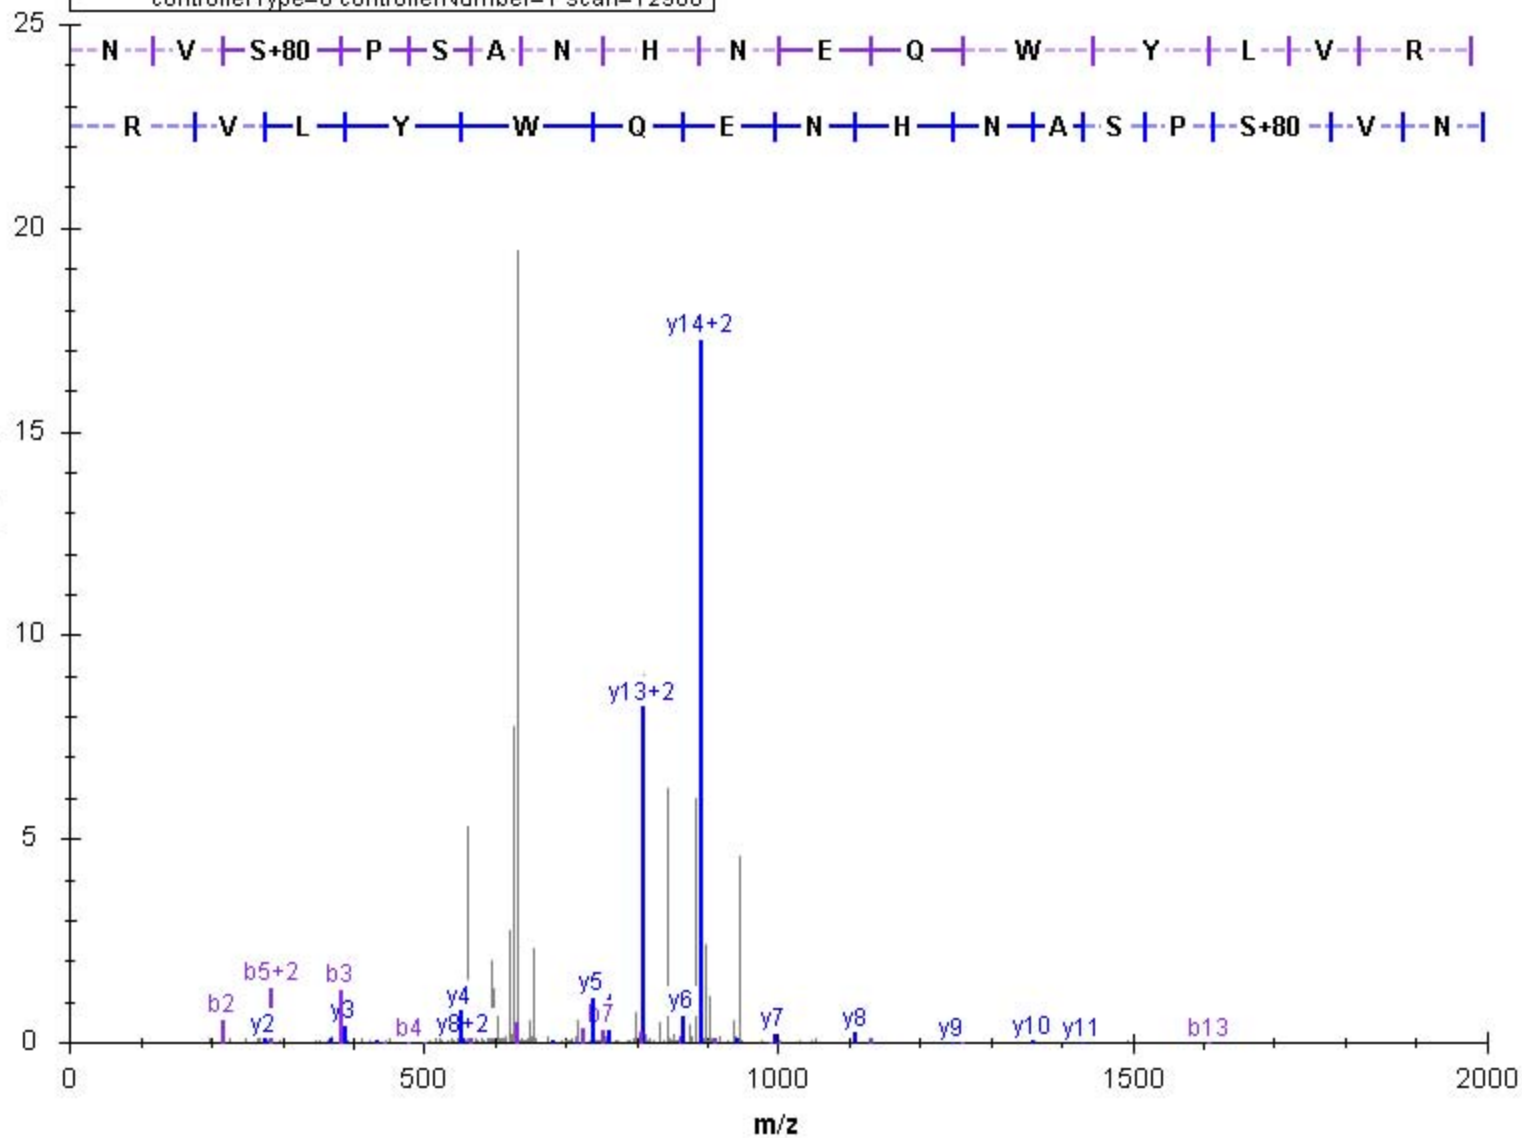



| b               | b(+2)           |    |   | y  | y(+2)           |                 |
|-----------------|-----------------|----|---|----|-----------------|-----------------|
| <b>115.050</b>  | 58.029          | 1  | N | 26 | 3113.385        | 1557.196        |
| 262.119         | 131.563         | 2  | F | 25 | 2999.342        | <b>1500.175</b> |
| <b>375.203</b>  | 188.105         | 3  | I | 24 | 2852.274        | <b>1426.640</b> |
| <b>446.240</b>  | 223.624         | 4  | A | 23 | 2739.190        | <b>1370.098</b> |
| <b>575.282</b>  | 288.145         | 5  | E | 22 | 2668.153        | <b>1334.580</b> |
| <b>690.309</b>  | <b>345.658</b>  | 6  | D | 21 | 2539.110        | <b>1270.059</b> |
| <b>804.352</b>  | <b>402.680</b>  | 7  | N | 20 | 2424.083        | <b>1212.545</b> |
| <b>933.395</b>  | 467.201         | 8  | E | 19 | 2310.040        | <b>1155.524</b> |
| <b>1096.458</b> | <b>548.733</b>  | 9  | Y | 18 | 2180.997        | <b>1091.002</b> |
| <b>1243.527</b> | <b>622.267</b>  | 10 | F | 17 | 2017.934        | <b>1009.471</b> |
| <b>1358.554</b> | 679.780         | 11 | D | 16 | <b>1870.866</b> | <b>935.936</b>  |
| <b>1473.580</b> | 737.294         | 12 | D | 15 | <b>1755.839</b> | <b>878.423</b>  |
| <b>1602.623</b> | 801.815         | 13 | E | 14 | <b>1640.812</b> | 820.910         |
| <b>1715.707</b> | <b>858.357</b>  | 14 | L | 13 | <b>1511.769</b> | <b>756.388</b>  |
| <b>1786.744</b> | 893.876         | 15 | A | 12 | <b>1398.685</b> | <b>699.846</b>  |
| <b>1843.766</b> | <b>922.386</b>  | 16 | G | 11 | <b>1327.648</b> | <b>664.328</b>  |
| <b>1956.850</b> | 978.929         | 17 | I | 10 | <b>1270.627</b> | 635.817         |
| 2069.934        | 1035.471        | 18 | I | 9  | <b>1157.543</b> | <b>579.275</b>  |
| 2206.993        | <b>1104.000</b> | 19 | H | 8  | <b>1044.458</b> | <b>522.733</b>  |
| 2374.025        | <b>1187.516</b> | 20 | S | 7  | <b>907.400</b>  | <b>454.203</b>  |
| 2471.078        | <b>1236.042</b> | 21 | P | 6  | <b>740.368</b>  | 370.687         |
| 2572.125        | <b>1286.566</b> | 22 | T | 5  | <b>643.315</b>  | <b>322.161</b>  |
| 2671.194        | <b>1336.100</b> | 23 | V | 4  | <b>542.267</b>  | 271.637         |
| 2838.226        | <b>1419.616</b> | 24 | S | 3  | <b>443.199</b>  | 222.103         |
| 2939.273        | <b>1470.140</b> | 25 | T | 2  | 276.167         | 138.587         |
| 3095.374        | <b>1548.191</b> | 26 | R | 1  | 175.119         | 88.063          |

controllerType=0 controllerNumber=1 scan=14229

Intensity (10<sup>3</sup>)

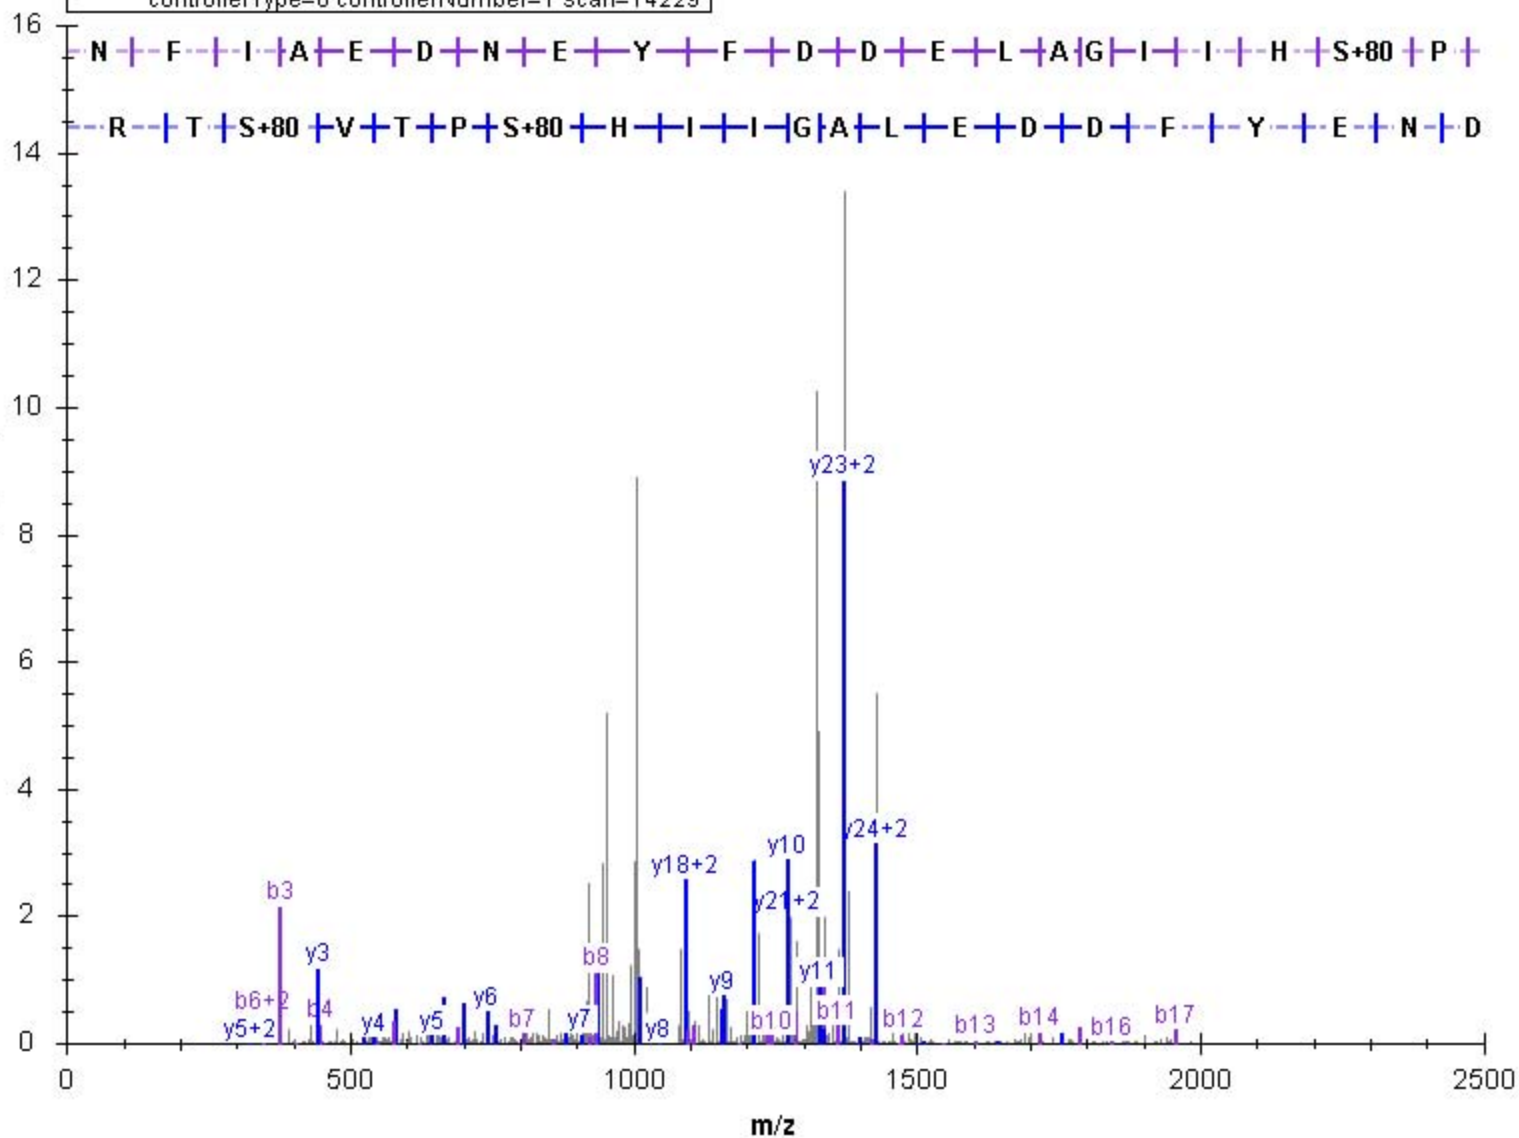

| b               | b(+2)           |    |   | y  | y(+2)           |                 |
|-----------------|-----------------|----|---|----|-----------------|-----------------|
| <b>115.050</b>  | 58.029          | 1  | N | 26 | 3033.385        | 1517.196        |
| 262.119         | 131.563         | 2  | F | 25 | 2919.342        | 1460.175        |
| <b>375.203</b>  | 188.105         | 3  | I | 24 | 2772.274        | <b>1386.640</b> |
| <b>446.240</b>  | 223.624         | 4  | A | 23 | 2659.190        | <b>1330.098</b> |
| <b>575.282</b>  | 288.145         | 5  | E | 22 | 2588.153        | <b>1294.580</b> |
| <b>690.309</b>  | 345.658         | 6  | D | 21 | 2459.110        | <b>1230.059</b> |
| <b>804.352</b>  | 402.680         | 7  | N | 20 | 2344.083        | <b>1172.545</b> |
| <b>933.395</b>  | 467.201         | 8  | E | 19 | 2230.040        | <b>1115.524</b> |
| <b>1096.458</b> | 548.733         | 9  | Y | 18 | 2100.997        | <b>1051.002</b> |
| <b>1243.527</b> | 622.267         | 10 | F | 17 | 1937.934        | <b>969.471</b>  |
| <b>1358.554</b> | 679.780         | 11 | D | 16 | 1790.866        | <b>895.936</b>  |
| <b>1473.580</b> | 737.294         | 12 | D | 15 | <b>1675.839</b> | <b>838.423</b>  |
| <b>1602.623</b> | <b>801.815</b>  | 13 | E | 14 | <b>1560.812</b> | <b>780.910</b>  |
| <b>1715.707</b> | 858.357         | 14 | L | 13 | <b>1431.769</b> | <b>716.388</b>  |
| <b>1786.744</b> | 893.876         | 15 | A | 12 | <b>1318.685</b> | <b>659.846</b>  |
| 1843.766        | 922.386         | 16 | G | 11 | <b>1247.648</b> | <b>624.328</b>  |
| 1956.850        | <b>978.929</b>  | 17 | I | 10 | <b>1190.627</b> | <b>595.817</b>  |
| 2069.934        | 1035.471        | 18 | I | 9  | <b>1077.543</b> | <b>539.275</b>  |
| 2206.993        | <b>1104.000</b> | 19 | H | 8  | <b>964.458</b>  | <b>482.733</b>  |
| 2374.025        | <b>1187.516</b> | 20 | S | 7  | <b>827.400</b>  | <b>414.203</b>  |
| 2471.078        | 1236.042        | 21 | P | 6  | <b>660.368</b>  | <b>330.687</b>  |
| 2572.125        | 1286.566        | 22 | T | 5  | 563.315         | 282.161         |
| 2671.194        | <b>1336.100</b> | 23 | V | 4  | <b>462.267</b>  | 231.637         |
| 2758.226        | 1379.616        | 24 | S | 3  | <b>363.199</b>  | 182.103         |
| 2859.273        | 1430.140        | 25 | T | 2  | 276.167         | 138.587         |
| 3015.374        | 1508.191        | 26 | R | 1  | 175.119         | 88.063          |

controllerType=0 controllerNumber=1 scan=15558

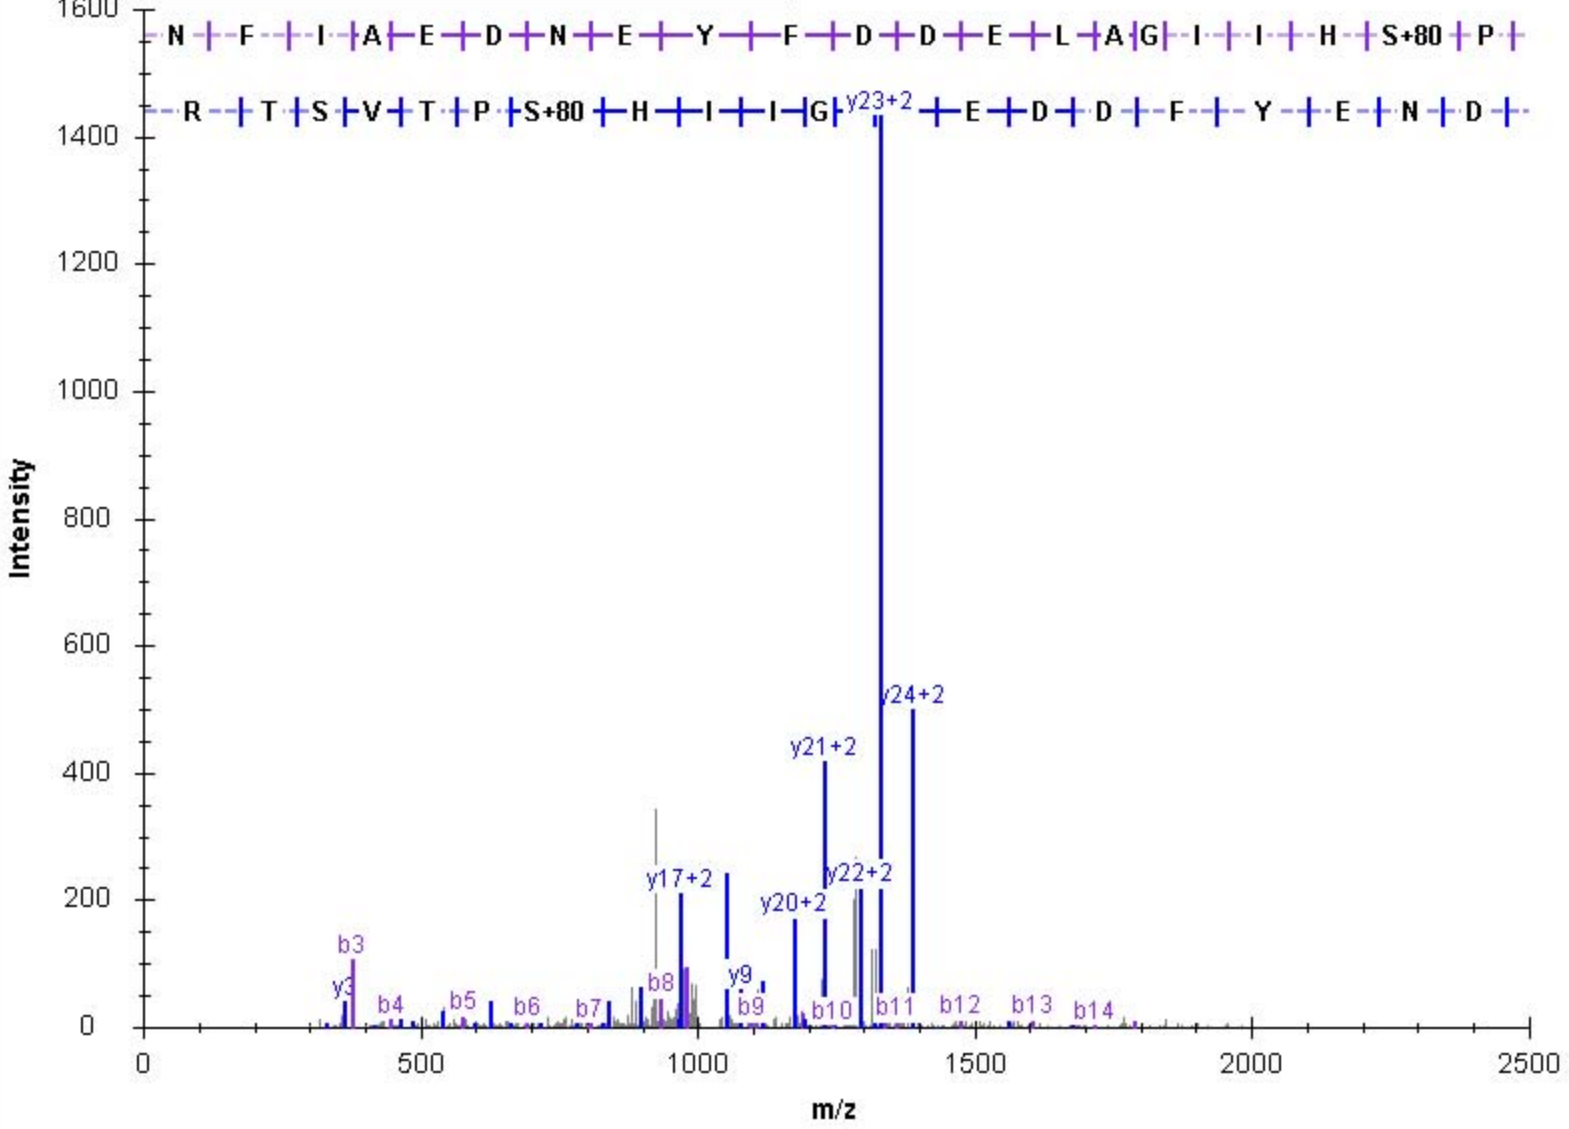

| b               | b(+2)           |    |   | y  | y(+2)           |                 |
|-----------------|-----------------|----|---|----|-----------------|-----------------|
| <b>88.039</b>   | 44.523          | 1  | S | 18 | 2140.833        | <b>1070.920</b> |
| <b>244.140</b>  | 122.574         | 2  | R | 17 | 2053.801        | 1027.404        |
| <b>358.183</b>  | 179.595         | 3  | N | 16 | 1897.700        | <b>949.354</b>  |
| <b>525.215</b>  | 263.111         | 4  | S | 15 | 1783.657        | <b>892.332</b>  |
| <b>596.252</b>  | 298.630         | 5  | A | 14 | 1616.625        | <b>808.816</b>  |
| <b>756.262</b>  | <b>378.634</b>  | 6  | C | 13 | 1545.588        | <b>773.298</b>  |
| 885.304         | <b>443.156</b>  | 7  | E | 12 | <b>1385.579</b> | <b>693.293</b>  |
| <b>1032.373</b> | <b>516.690</b>  | 8  | F | 11 | <b>1256.536</b> | <b>628.772</b>  |
| 1129.425        | 565.216         | 9  | P | 10 | <b>1109.468</b> | <b>555.238</b>  |
| <b>1258.468</b> | <b>629.738</b>  | 10 | E | 9  | <b>1012.415</b> | <b>506.711</b>  |
| <b>1345.500</b> | 673.254         | 11 | S | 8  | <b>883.373</b>  | <b>442.190</b>  |
| <b>1476.541</b> | <b>738.774</b>  | 12 | M | 7  | <b>796.341</b>  | <b>398.674</b>  |
| <b>1613.599</b> | <b>807.303</b>  | 13 | H | 6  | <b>665.300</b>  | 333.154         |
| 1712.668        | <b>856.838</b>  | 14 | V | 5  | <b>528.241</b>  | 264.624         |
| 1841.710        | <b>921.359</b>  | 15 | E | 4  | 429.173         | <b>215.090</b>  |
| 1978.769        | <b>989.888</b>  | 16 | H | 3  | <b>300.130</b>  | 150.569         |
| 2065.801        | <b>1033.404</b> | 17 | S | 2  | 163.071         | 82.039          |
| 2122.823        | 1061.915        | 18 | G | 1  | 76.039          | 38.523          |

controllerType=0 controllerNumber=1 scan=8349

Intensity (10<sup>3</sup>)

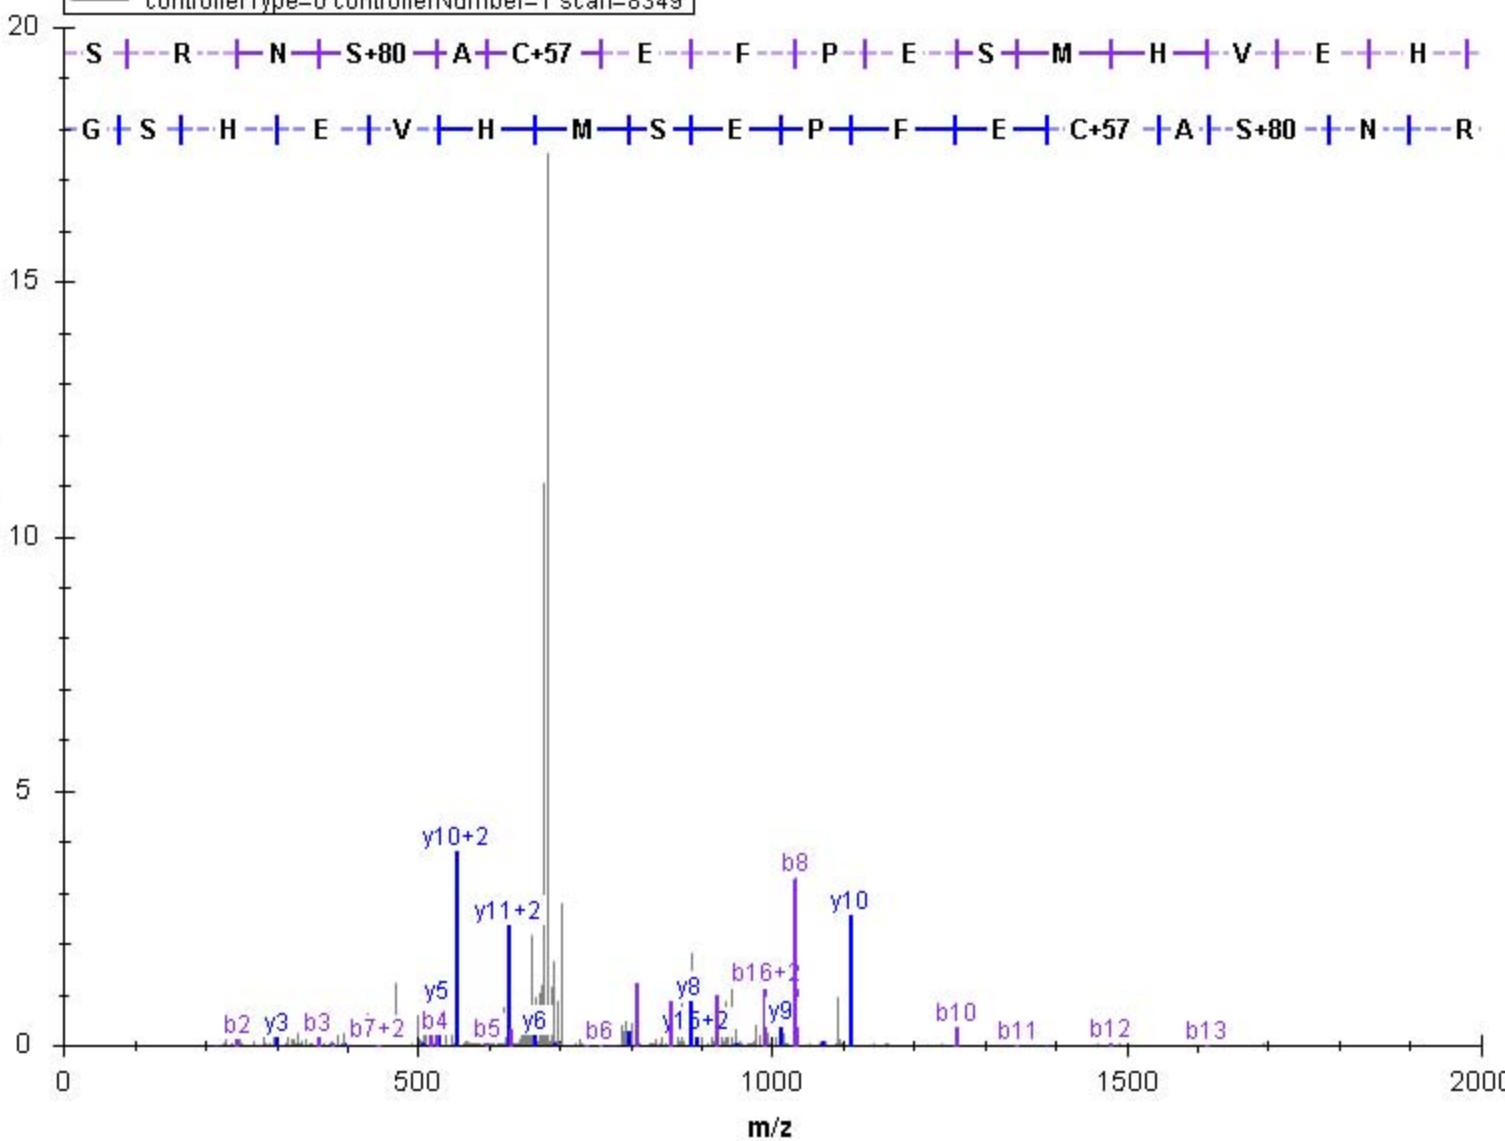

| b               | b(+2)          |    |   |    | y               | y(+2)          |
|-----------------|----------------|----|---|----|-----------------|----------------|
| 138.066         | 69.537         | 1  | H | 10 | 1174.595        | 587.801        |
| <b>237.135</b>  | 119.071        | 2  | V | 9  | <b>1037.536</b> | <b>519.272</b> |
| <b>365.193</b>  | <b>183.100</b> | 3  | Q | 8  | <b>938.468</b>  | 469.738        |
| <b>422.215</b>  | 211.611        | 4  | G | 7  | <b>810.409</b>  | <b>405.708</b> |
| <b>537.242</b>  | 269.124        | 5  | D | 6  | <b>753.388</b>  | <b>377.198</b> |
| <b>704.274</b>  | 352.640        | 6  | S | 5  | <b>638.361</b>  | 319.684        |
| <b>801.326</b>  | 401.167        | 7  | P | 4  | <b>471.329</b>  | 236.168        |
| <b>900.395</b>  | 450.701        | 8  | V | 3  | <b>374.276</b>  | <b>187.642</b> |
| <b>1028.490</b> | 514.749        | 9  | K | 2  | <b>275.208</b>  | 138.108        |
| 1156.585        | <b>578.796</b> | 10 | K | 1  | 147.113         | 74.060         |

controllerType=0 controllerNumber=1 scan=2522

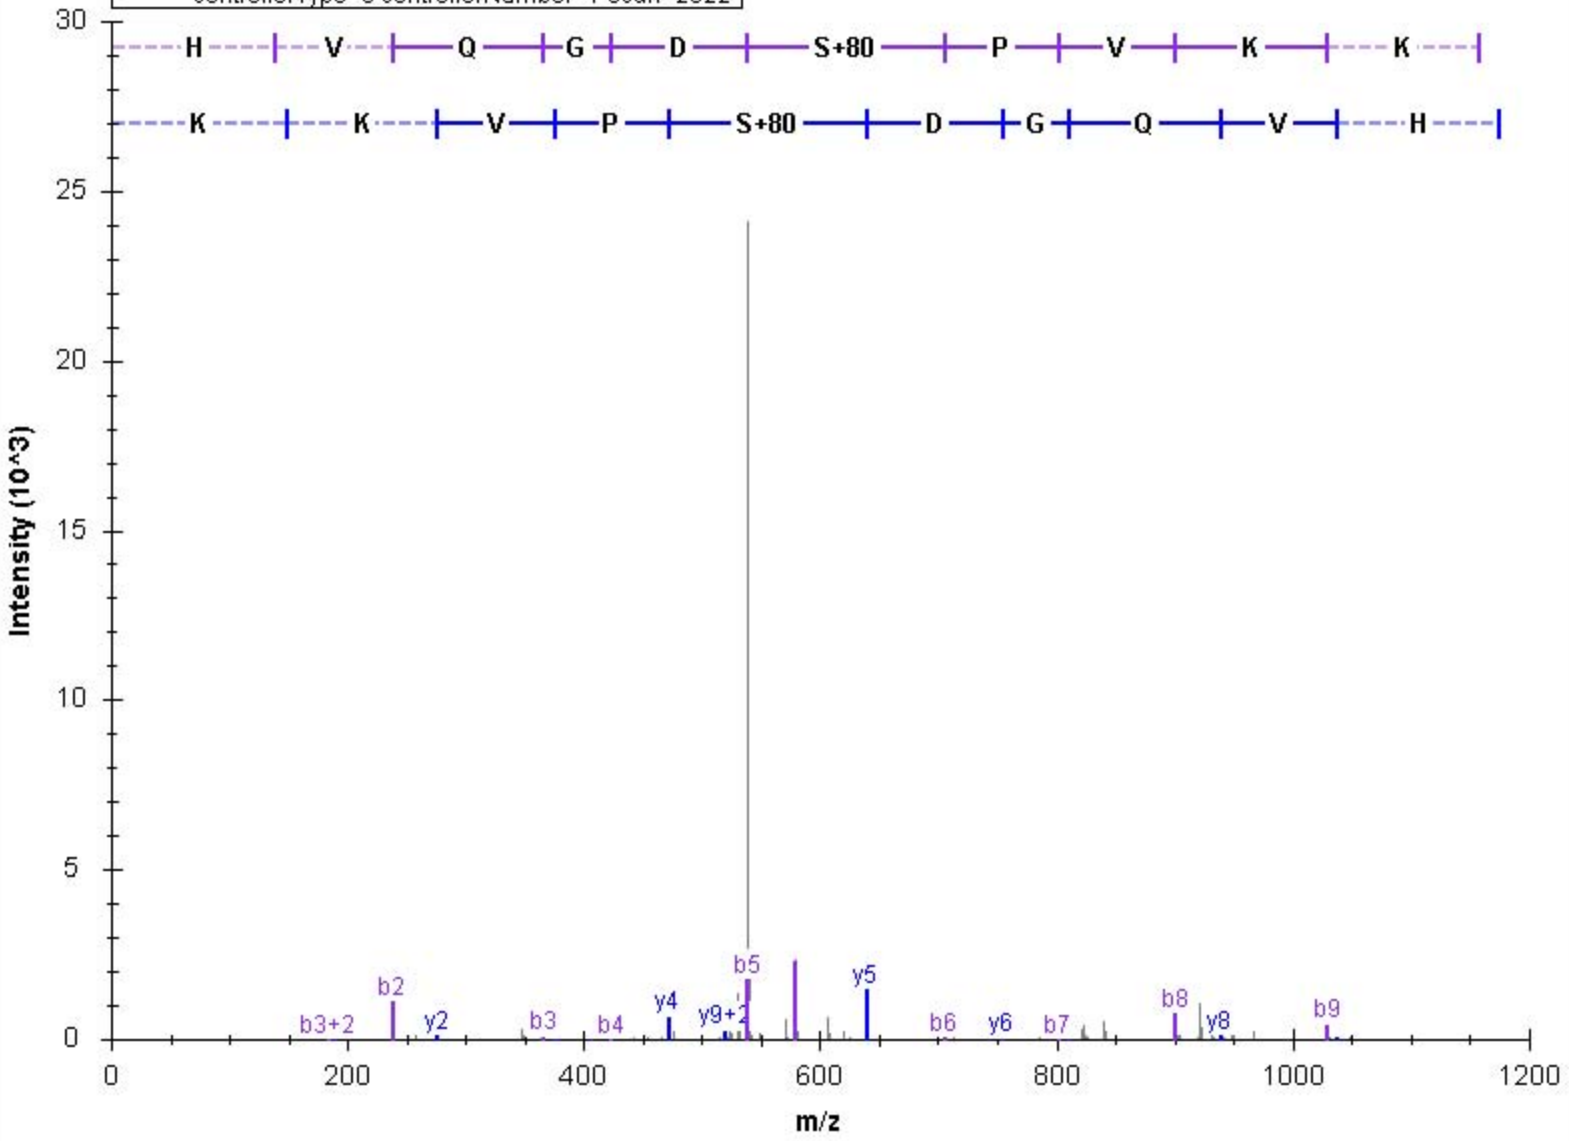



| b               | b(+2)    |    |   |    | y               | y(+2)           |
|-----------------|----------|----|---|----|-----------------|-----------------|
| <b>88.039</b>   | 44.523   | 1  | S | 22 | 2381.015        | 1191.011        |
| 145.061         | 73.034   | 2  | G | 21 | 2293.983        | 1147.495        |
| 258.145         | 129.576  | 3  | L | 20 | 2236.962        | 1118.985        |
| 373.172         | 187.090  | 4  | D | 19 | 2123.878        | 1062.443        |
| 460.204         | 230.606  | 5  | S | 18 | 2008.851        | <b>1004.929</b> |
| 607.272         | 304.140  | 6  | F | 17 | <b>1921.819</b> | <b>961.413</b>  |
| <b>722.299</b>  | 361.653  | 7  | D | 16 | 1774.750        | <b>887.879</b>  |
| <b>837.326</b>  | 419.167  | 8  | D | 15 | 1659.723        | 830.365         |
| <b>965.385</b>  | 483.196  | 9  | Q | 14 | 1544.697        | 772.852         |
| 1132.417        | 566.712  | 10 | S | 13 | <b>1416.638</b> | 708.823         |
| 1219.449        | 610.228  | 11 | S | 12 | <b>1249.606</b> | 625.307         |
| <b>1318.517</b> | 659.762  | 12 | V | 11 | <b>1162.574</b> | 581.791         |
| 1447.560        | 724.284  | 13 | E | 10 | <b>1063.505</b> | 532.256         |
| <b>1518.597</b> | 759.802  | 14 | A | 9  | <b>934.463</b>  | 467.735         |
| <b>1605.629</b> | 803.318  | 15 | S | 8  | <b>863.426</b>  | 432.217         |
| 1662.650        | 831.829  | 16 | G | 7  | <b>776.394</b>  | 388.701         |
| <b>1848.730</b> | 924.868  | 17 | W | 6  | <b>719.372</b>  | 360.190         |
| 1949.777        | 975.392  | 18 | T | 5  | <b>533.293</b>  | 267.150         |
| 2078.820        | 1039.914 | 19 | E | 4  | 432.245         | 216.626         |
| 2177.888        | 1089.448 | 20 | V | 3  | 303.203         | 152.105         |
| 2234.910        | 1117.959 | 21 | G | 2  | 204.134         | 102.571         |
| 2363.005        | 1182.006 | 22 | K | 1  | 147.113         | 74.060          |

controllerType=0 controllerNumber=1 scan=11316

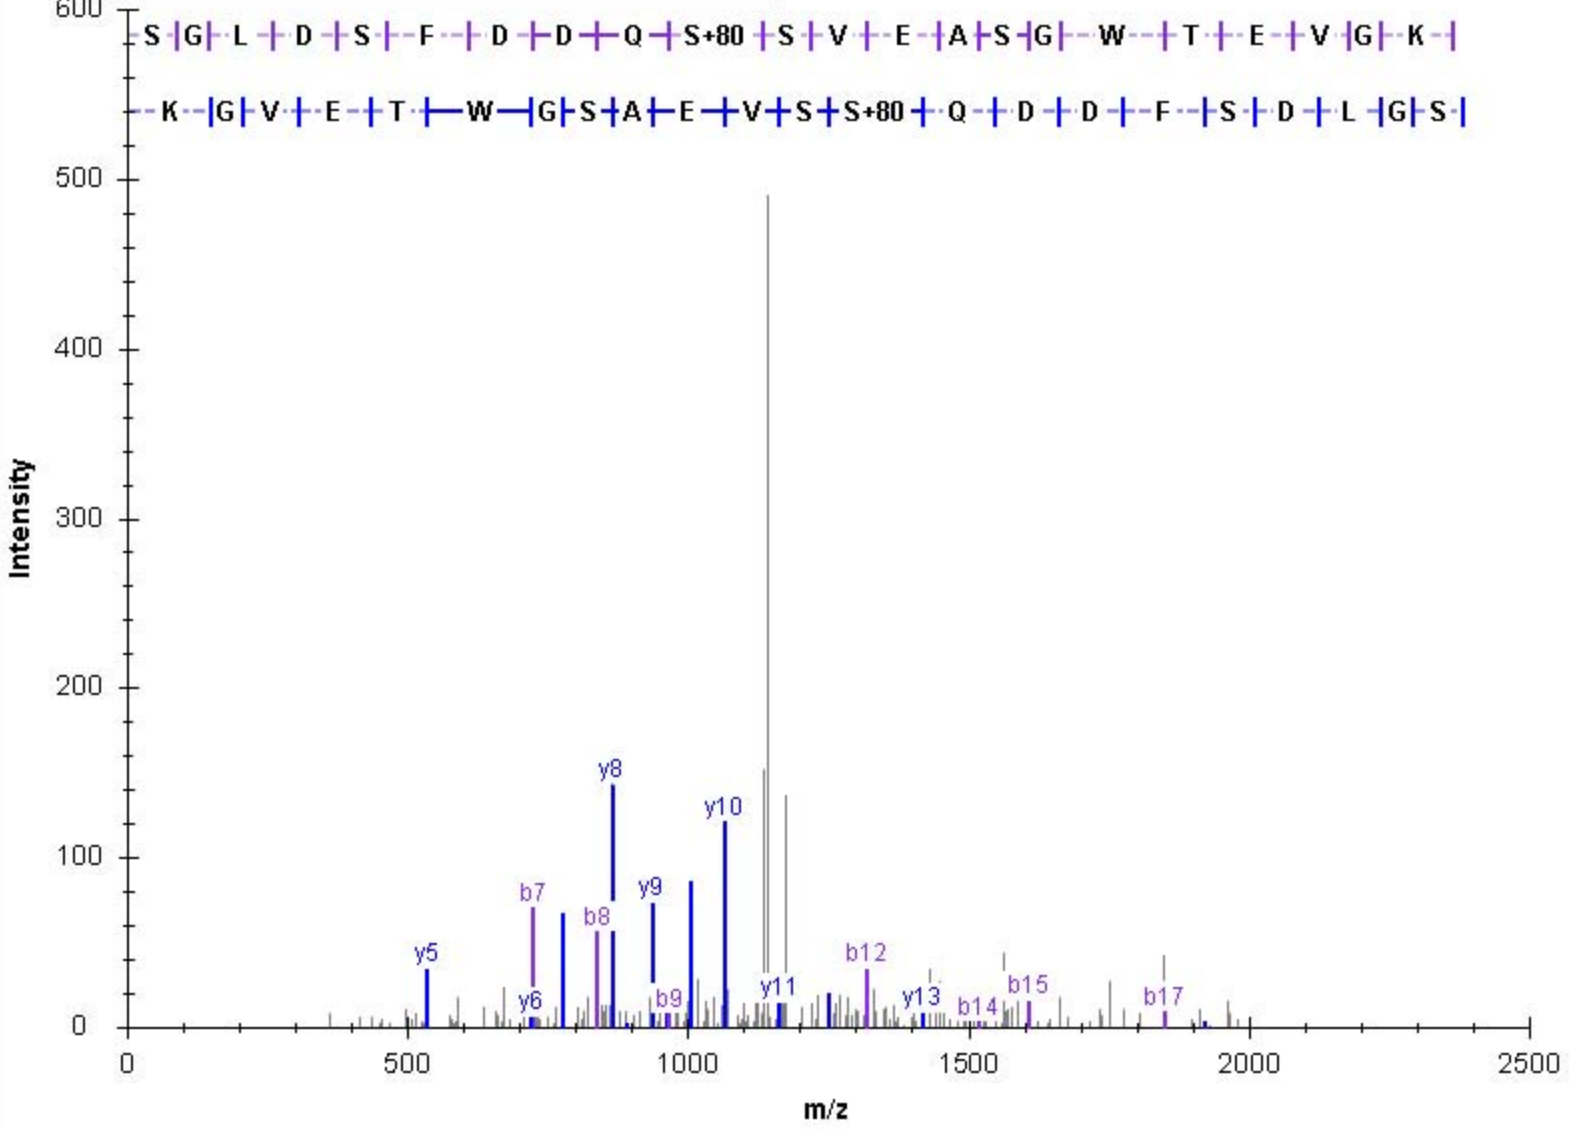

| b               | b(+2)           |    |   |    | y               | y(+2)           |
|-----------------|-----------------|----|---|----|-----------------|-----------------|
| <b>148.076</b>  | 74.541          | 1  | F | 18 | 2229.977        | <b>1115.492</b> |
| 261.160         | 131.084         | 2  | L | 17 | 2082.909        | <b>1041.958</b> |
| <b>417.261</b>  | 209.134         | 3  | R | 16 | 1969.825        | <b>985.416</b>  |
| <b>546.303</b>  | 273.655         | 4  | E | 15 | 1813.724        | 907.365         |
| <b>661.330</b>  | 331.169         | 5  | D | 14 | 1684.681        | <b>842.844</b>  |
| <b>760.399</b>  | <b>380.703</b>  | 6  | V | 13 | 1569.654        | 785.331         |
| <b>889.441</b>  | 445.224         | 7  | E | 12 | 1470.586        | <b>735.796</b>  |
| <b>1018.484</b> | <b>509.746</b>  | 8  | E | 11 | 1341.543        | <b>671.275</b>  |
| <b>1147.527</b> | <b>574.267</b>  | 9  | E | 10 | <b>1212.500</b> | 606.754         |
| <b>1276.569</b> | <b>638.788</b>  | 10 | E | 9  | <b>1083.458</b> | <b>542.233</b>  |
| <b>1405.612</b> | <b>703.310</b>  | 11 | E | 8  | <b>954.415</b>  | <b>477.711</b>  |
| 1572.644        | 786.826         | 12 | S | 7  | <b>825.373</b>  | <b>413.190</b>  |
| 1669.697        | 835.352         | 13 | P | 6  | <b>658.341</b>  | 329.674         |
| 1784.724        | <b>892.865</b>  | 14 | D | 5  | <b>561.288</b>  | 281.148         |
| 1855.761        | <b>928.384</b>  | 15 | A | 4  | <b>446.261</b>  | 223.634         |
| 1954.829        | <b>977.918</b>  | 16 | V | 3  | <b>375.224</b>  | 188.116         |
| 2083.872        | <b>1042.439</b> | 17 | E | 2  | <b>276.155</b>  | 138.581         |
| 2211.967        | 1106.487        | 18 | K | 1  | 147.113         | 74.060          |

controllerType=0 controllerNumber=1 scan=8060

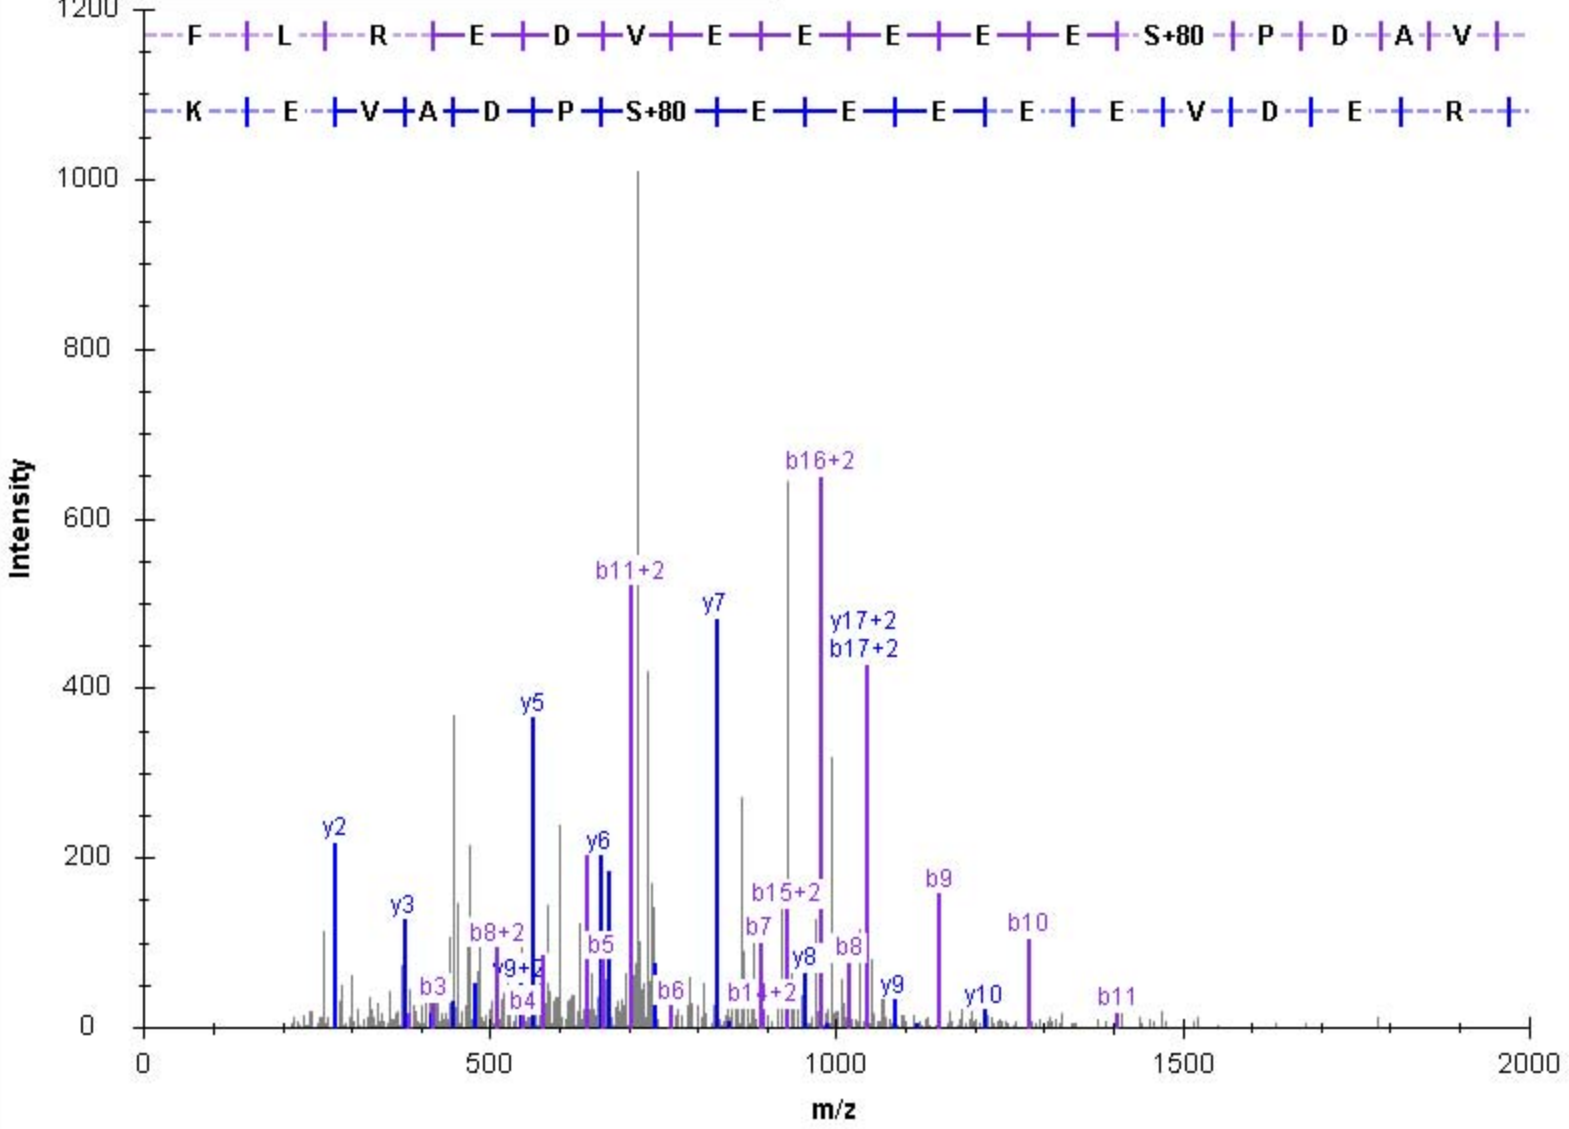

| b               | b(+2)           |    |   | y  | y(+2)           |                 |
|-----------------|-----------------|----|---|----|-----------------|-----------------|
| <b>148.076</b>  | 74.541          | 1  | F | 20 | 2487.115        | <b>1244.061</b> |
| 261.160         | 131.084         | 2  | L | 19 | 2340.046        | <b>1170.527</b> |
| <b>417.261</b>  | 209.134         | 3  | R | 18 | 2226.962        | <b>1113.985</b> |
| <b>546.303</b>  | 273.655         | 4  | E | 17 | 2070.861        | <b>1035.934</b> |
| <b>661.330</b>  | 331.169         | 5  | D | 16 | 1941.819        | 971.413         |
| <b>760.399</b>  | <b>380.703</b>  | 6  | V | 15 | 1826.792        | <b>913.899</b>  |
| <b>889.441</b>  | <b>445.224</b>  | 7  | E | 14 | 1727.723        | 864.365         |
| <b>1018.484</b> | <b>509.746</b>  | 8  | E | 13 | 1598.681        | <b>799.844</b>  |
| <b>1147.527</b> | <b>574.267</b>  | 9  | E | 12 | 1469.638        | 735.323         |
| <b>1276.569</b> | <b>638.788</b>  | 10 | E | 11 | <b>1340.595</b> | 670.801         |
| <b>1405.612</b> | <b>703.310</b>  | 11 | E | 10 | <b>1211.553</b> | 606.280         |
| <b>1572.644</b> | <b>786.826</b>  | 12 | S | 9  | <b>1082.510</b> | <b>541.759</b>  |
| 1669.697        | <b>835.352</b>  | 13 | P | 8  | <b>915.478</b>  | 458.243         |
| <b>1784.724</b> | <b>892.865</b>  | 14 | D | 7  | <b>818.425</b>  | 409.716         |
| 1855.761        | <b>928.384</b>  | 15 | A | 6  | <b>703.398</b>  | <b>352.203</b>  |
| 1954.829        | <b>977.918</b>  | 16 | V | 5  | <b>632.361</b>  | 316.684         |
| 2083.872        | 1042.439        | 17 | E | 4  | <b>533.293</b>  | 267.150         |
| 2211.967        | <b>1106.487</b> | 18 | K | 3  | <b>404.250</b>  | 202.629         |
| 2341.009        | <b>1171.008</b> | 19 | E | 2  | <b>276.155</b>  | 138.581         |
| 2469.104        | <b>1235.056</b> | 20 | K | 1  | 147.113         | 74.060          |

controllerType=0 controllerNumber=1 scan=8395

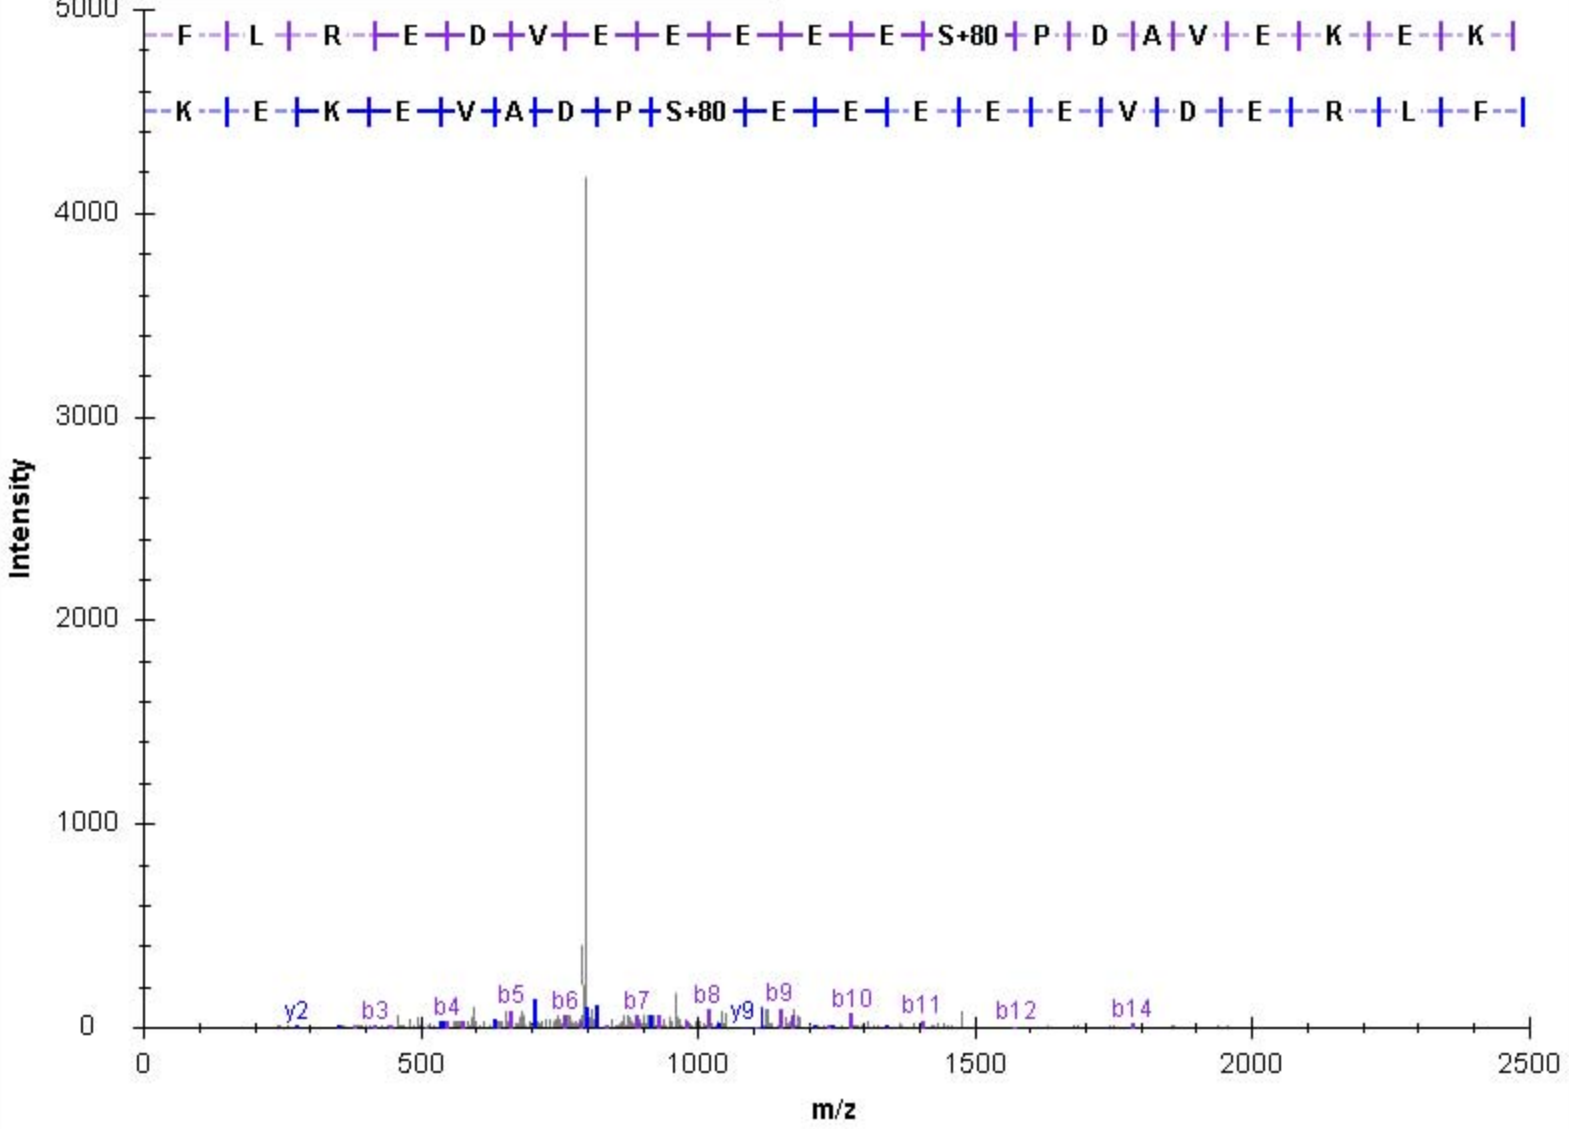

| b               | b(+2)           |    |   | y  | y(+2)           |                 |
|-----------------|-----------------|----|---|----|-----------------|-----------------|
| 116.034         | 58.521          | 1  | D | 21 | 2335.094        | 1168.051        |
| 215.103         | 108.055         | 2  | V | 20 | 2220.067        | <b>1110.537</b> |
| 286.140         | 143.574         | 3  | A | 19 | 2120.999        | <b>1061.003</b> |
| 373.172         | 187.090         | 4  | S | 18 | 2049.961        | <b>1025.484</b> |
| 502.214         | 251.611         | 5  | E | 17 | 1962.929        | 981.968         |
| 599.267         | 300.137         | 6  | P | 16 | <b>1833.887</b> | <b>917.447</b>  |
| <b>762.330</b>  | 381.669         | 7  | Y | 15 | <b>1736.834</b> | <b>868.921</b>  |
| <b>861.399</b>  | <b>431.203</b>  | 8  | V | 14 | <b>1573.771</b> | 787.389         |
| <b>975.442</b>  | 488.225         | 9  | N | 13 | <b>1474.702</b> | <b>737.855</b>  |
| 1032.463        | <b>516.735</b>  | 10 | G | 12 | <b>1360.659</b> | 680.833         |
| <b>1131.532</b> | 566.269         | 11 | V | 11 | <b>1303.638</b> | <b>652.323</b>  |
| <b>1259.590</b> | <b>630.299</b>  | 12 | Q | 10 | 1204.569        | 602.788         |
| <b>1426.622</b> | <b>713.815</b>  | 13 | S | 9  | <b>1076.511</b> | 538.759         |
| 1554.681        | 777.844         | 14 | Q | 8  | <b>909.479</b>  | 455.243         |
| <b>1683.723</b> | 842.365         | 15 | E | 7  | <b>781.420</b>  | 391.214         |
| <b>1820.782</b> | <b>910.895</b>  | 16 | H | 6  | <b>652.378</b>  | 326.692         |
| <b>1933.866</b> | <b>967.437</b>  | 17 | L | 5  | <b>515.319</b>  | 258.163         |
| 2030.919        | 1015.963        | 18 | P | 4  | <b>402.235</b>  | 201.621         |
| 2117.951        | 1059.479        | 19 | S | 3  | 305.182         | 153.095         |
| 2188.988        | <b>1094.998</b> | 20 | A | 2  | 218.150         | 109.579         |
| 2317.083        | 1159.045        | 21 | K | 1  | 147.113         | 74.060          |

controllerType=0 controllerNumber=1 scan=8646

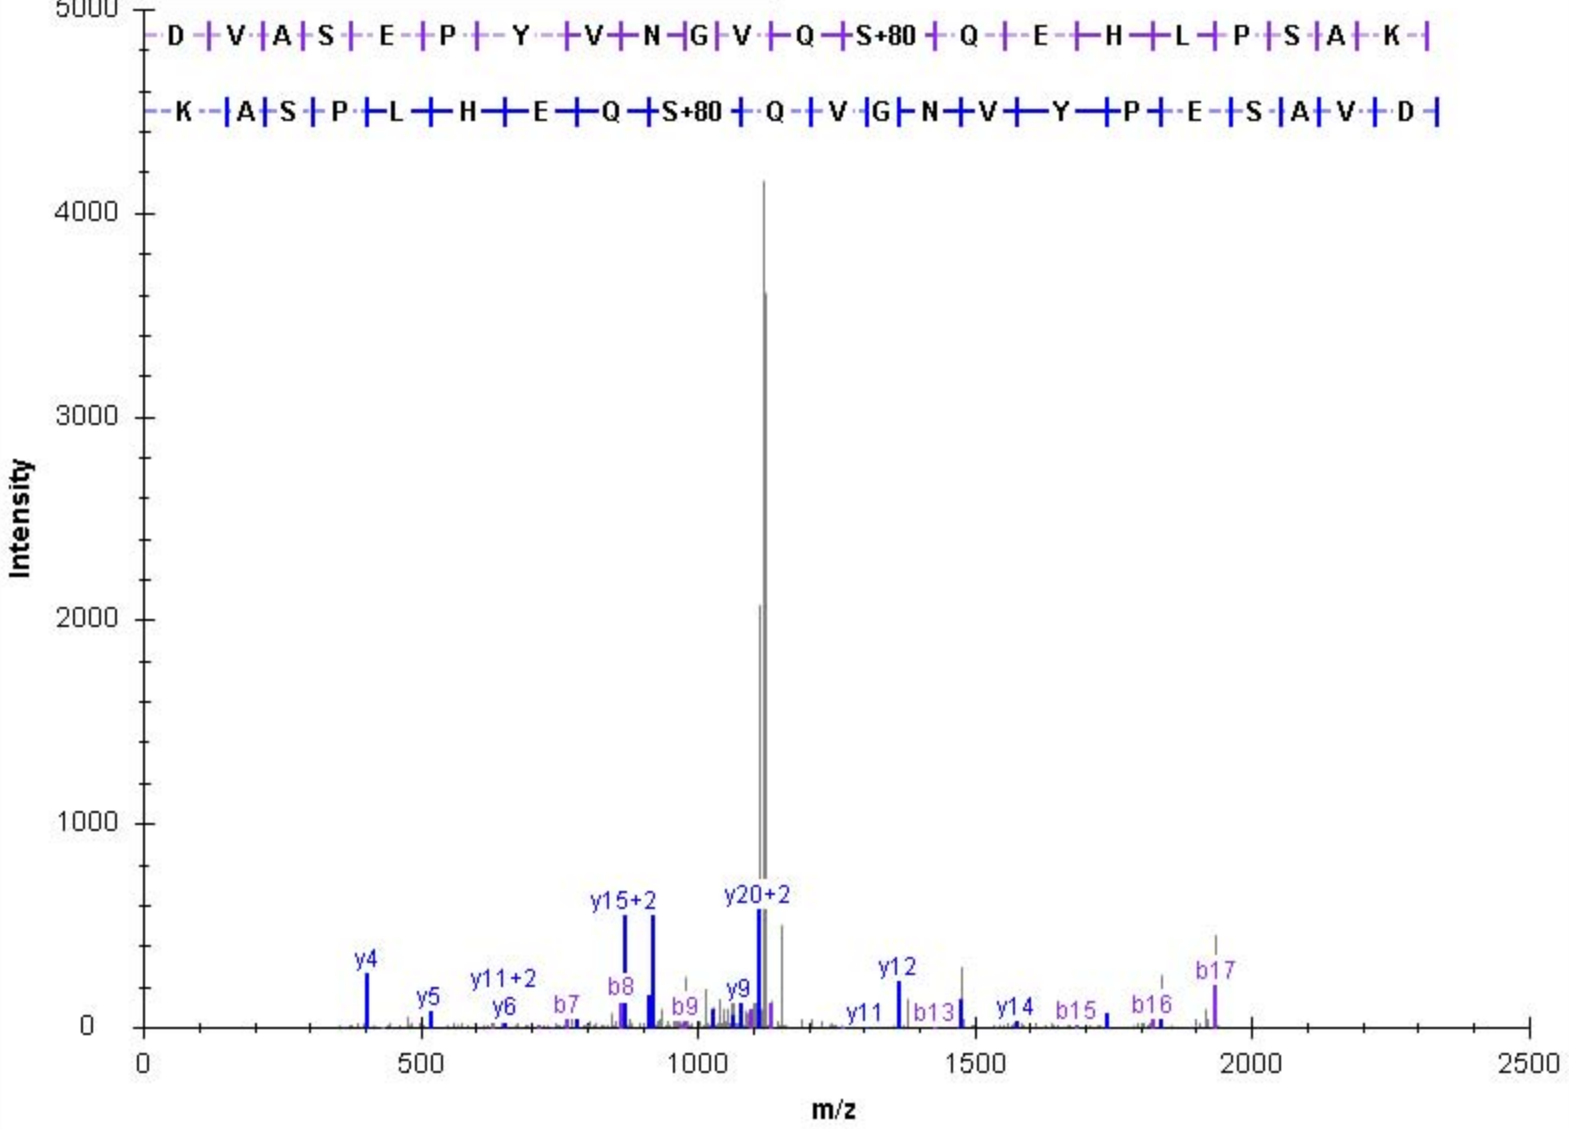



| b               | b(+2)           |    |   |    | y               | y(+2)           |
|-----------------|-----------------|----|---|----|-----------------|-----------------|
| <b>129.102</b>  | 65.055          | 1  | K | 22 | 2463.189        | 1232.098        |
| <b>244.129</b>  | 122.568         | 2  | D | 21 | 2335.094        | <b>1168.051</b> |
| <b>343.198</b>  | 172.102         | 3  | V | 20 | 2220.067        | <b>1110.537</b> |
| <b>414.235</b>  | 207.621         | 4  | A | 19 | 2120.999        | <b>1061.003</b> |
| <b>501.267</b>  | <b>251.137</b>  | 5  | S | 18 | 2049.961        | <b>1025.484</b> |
| <b>630.309</b>  | 315.658         | 6  | E | 17 | 1962.929        | <b>981.968</b>  |
| <b>727.362</b>  | 364.185         | 7  | P | 16 | 1833.887        | <b>917.447</b>  |
| <b>890.425</b>  | 445.716         | 8  | Y | 15 | <b>1736.834</b> | <b>868.921</b>  |
| <b>989.494</b>  | <b>495.251</b>  | 9  | V | 14 | <b>1573.771</b> | <b>787.389</b>  |
| <b>1103.537</b> | <b>552.272</b>  | 10 | N | 13 | <b>1474.702</b> | <b>737.855</b>  |
| <b>1160.558</b> | <b>580.783</b>  | 11 | G | 12 | <b>1360.659</b> | <b>680.833</b>  |
| <b>1259.627</b> | <b>630.317</b>  | 12 | V | 11 | <b>1303.638</b> | <b>652.323</b>  |
| <b>1387.685</b> | <b>694.346</b>  | 13 | Q | 10 | <b>1204.569</b> | <b>602.788</b>  |
| <b>1554.717</b> | <b>777.862</b>  | 14 | S | 9  | <b>1076.511</b> | <b>538.759</b>  |
| <b>1682.776</b> | <b>841.892</b>  | 15 | Q | 8  | <b>909.479</b>  | <b>455.243</b>  |
| <b>1811.818</b> | <b>906.413</b>  | 16 | E | 7  | <b>781.420</b>  | 391.214         |
| 1948.877        | <b>974.942</b>  | 17 | H | 6  | <b>652.378</b>  | <b>326.692</b>  |
| 2061.961        | <b>1031.484</b> | 18 | L | 5  | <b>515.319</b>  | 258.163         |
| 2159.014        | <b>1080.011</b> | 19 | P | 4  | <b>402.235</b>  | 201.621         |
| 2246.046        | <b>1123.527</b> | 20 | S | 3  | <b>305.182</b>  | 153.095         |
| 2317.083        | <b>1159.045</b> | 21 | A | 2  | 218.150         | 109.579         |
| 2445.178        | 1223.093        | 22 | K | 1  | 147.113         | 74.060          |

controllerType=0 controllerNumber=1 scan=8362

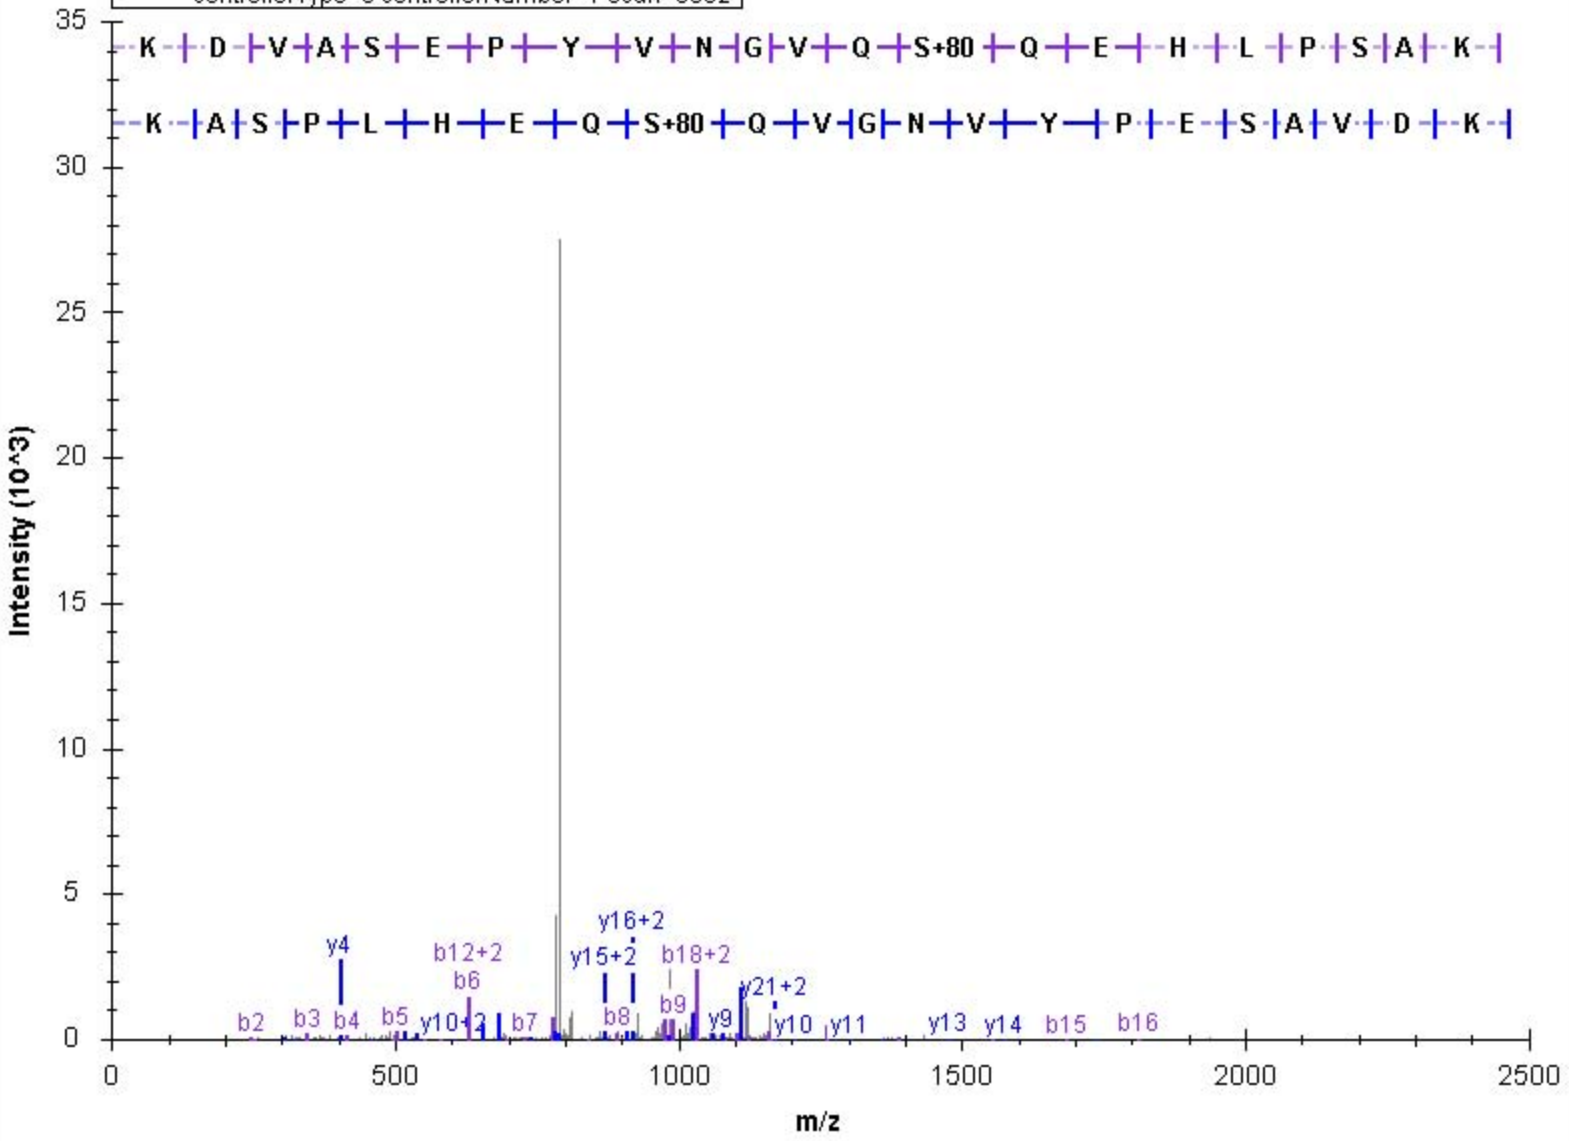

| b               | b(+2)          |    |   |    | y               | y(+2)          |
|-----------------|----------------|----|---|----|-----------------|----------------|
| <b>88.039</b>   | 44.523         | 1  | S | 17 | 1719.813        | 860.410        |
| 216.098         | 108.553        | 2  | Q | 16 | 1632.781        | <b>816.894</b> |
| <b>287.135</b>  | 144.071        | 3  | A | 15 | <b>1504.723</b> | <b>752.865</b> |
| <b>374.167</b>  | 187.587        | 4  | S | 14 | <b>1433.686</b> | <b>717.346</b> |
| <b>473.235</b>  | 237.121        | 5  | V | 13 | <b>1346.654</b> | <b>673.830</b> |
| <b>560.267</b>  | 280.637        | 6  | S | 12 | <b>1247.585</b> | <b>624.296</b> |
| <b>647.299</b>  | 324.153        | 7  | S | 11 | <b>1160.553</b> | 580.780        |
| <b>748.347</b>  | 374.677        | 8  | T | 10 | <b>1073.521</b> | 537.264        |
| <b>819.384</b>  | <b>410.196</b> | 9  | A | 9  | <b>972.473</b>  | 486.740        |
| <b>986.416</b>  | 493.712        | 10 | S | 8  | <b>901.436</b>  | 451.222        |
| <b>1087.464</b> | <b>544.236</b> | 11 | T | 7  | <b>734.404</b>  | <b>367.706</b> |
| <b>1188.512</b> | <b>594.759</b> | 12 | T | 6  | <b>633.357</b>  | 317.182        |
| <b>1245.533</b> | 623.270        | 13 | G | 5  | <b>532.309</b>  | <b>266.658</b> |
| <b>1373.592</b> | <b>687.299</b> | 14 | Q | 4  | <b>475.287</b>  | 238.147        |
| <b>1474.639</b> | <b>737.823</b> | 15 | T | 3  | <b>347.229</b>  | 174.118        |
| <b>1573.708</b> | <b>787.358</b> | 16 | V | 2  | <b>246.181</b>  | 123.594        |
| 1701.803        | <b>851.405</b> | 17 | K | 1  | 147.113         | 74.060         |

controllerType=0 controllerNumber=1 scan=3220

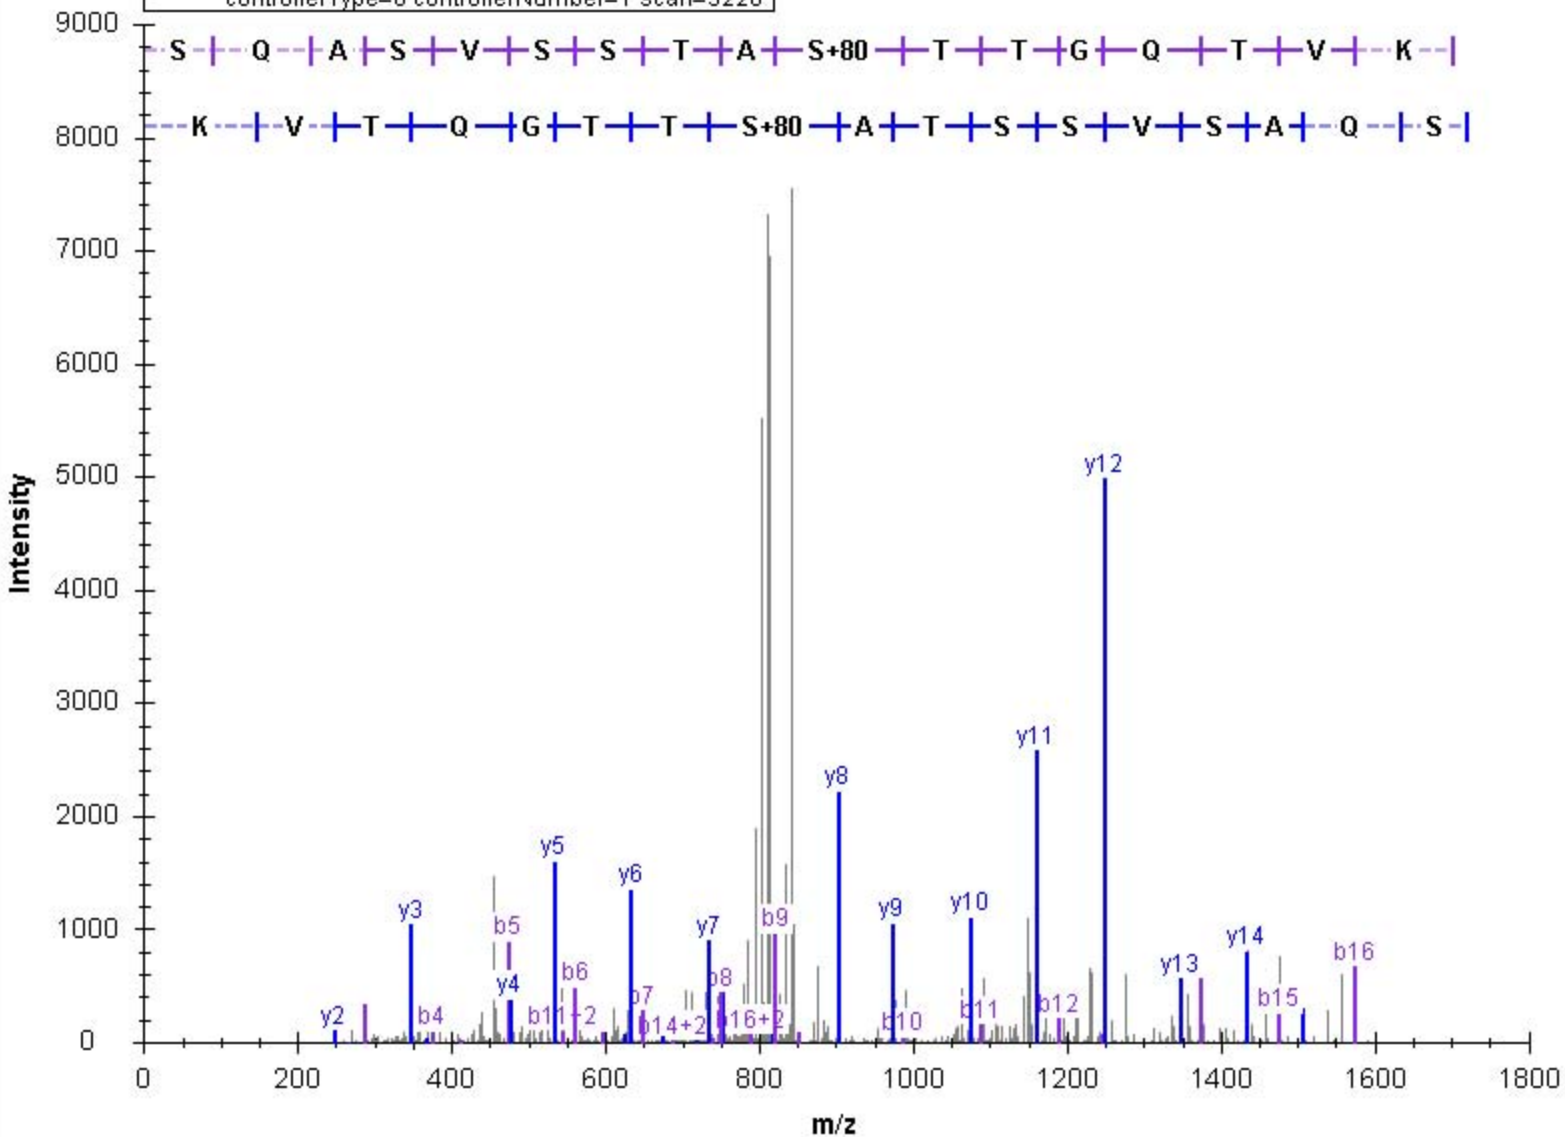

| b               | b(+2)          |    |   | y  | y(+2)                   |
|-----------------|----------------|----|---|----|-------------------------|
| <b>168.039</b>  | 84.523         | 1  | S | 14 | 1577.791 789.399        |
| <b>265.092</b>  | 133.050        | 2  | P | 13 | 1410.759 705.883        |
| <b>378.176</b>  | 189.592        | 3  | I | 12 | 1313.706 657.357        |
| <b>449.213</b>  | 225.110        | 4  | A | 11 | 1200.622 <b>600.815</b> |
| 546.266         | 273.637        | 5  | P | 10 | 1129.585 <b>565.296</b> |
| <b>659.350</b>  | 330.179        | 6  | L | 9  | 1032.532 <b>516.770</b> |
| <b>760.398</b>  | 380.703        | 7  | T | 8  | <b>919.448 460.228</b>  |
| 889.440         | 445.224        | 8  | E | 7  | <b>818.400 409.704</b>  |
| <b>1004.467</b> | <b>502.737</b> | 9  | D | 6  | <b>689.358 345.182</b>  |
| <b>1132.526</b> | <b>566.767</b> | 10 | Q | 5  | <b>574.331 287.669</b>  |
| 1245.610        | <b>623.309</b> | 11 | L | 4  | <b>446.272 223.640</b>  |
| 1332.642        | <b>666.825</b> | 12 | S | 3  | <b>333.188 167.098</b>  |
| 1403.679        | 702.343        | 13 | A | 2  | <b>246.156 123.582</b>  |
| 1559.780        | 780.394        | 14 | R | 1  | <b>175.119 88.063</b>   |

controllerType=0 controllerNumber=1 scan=8347

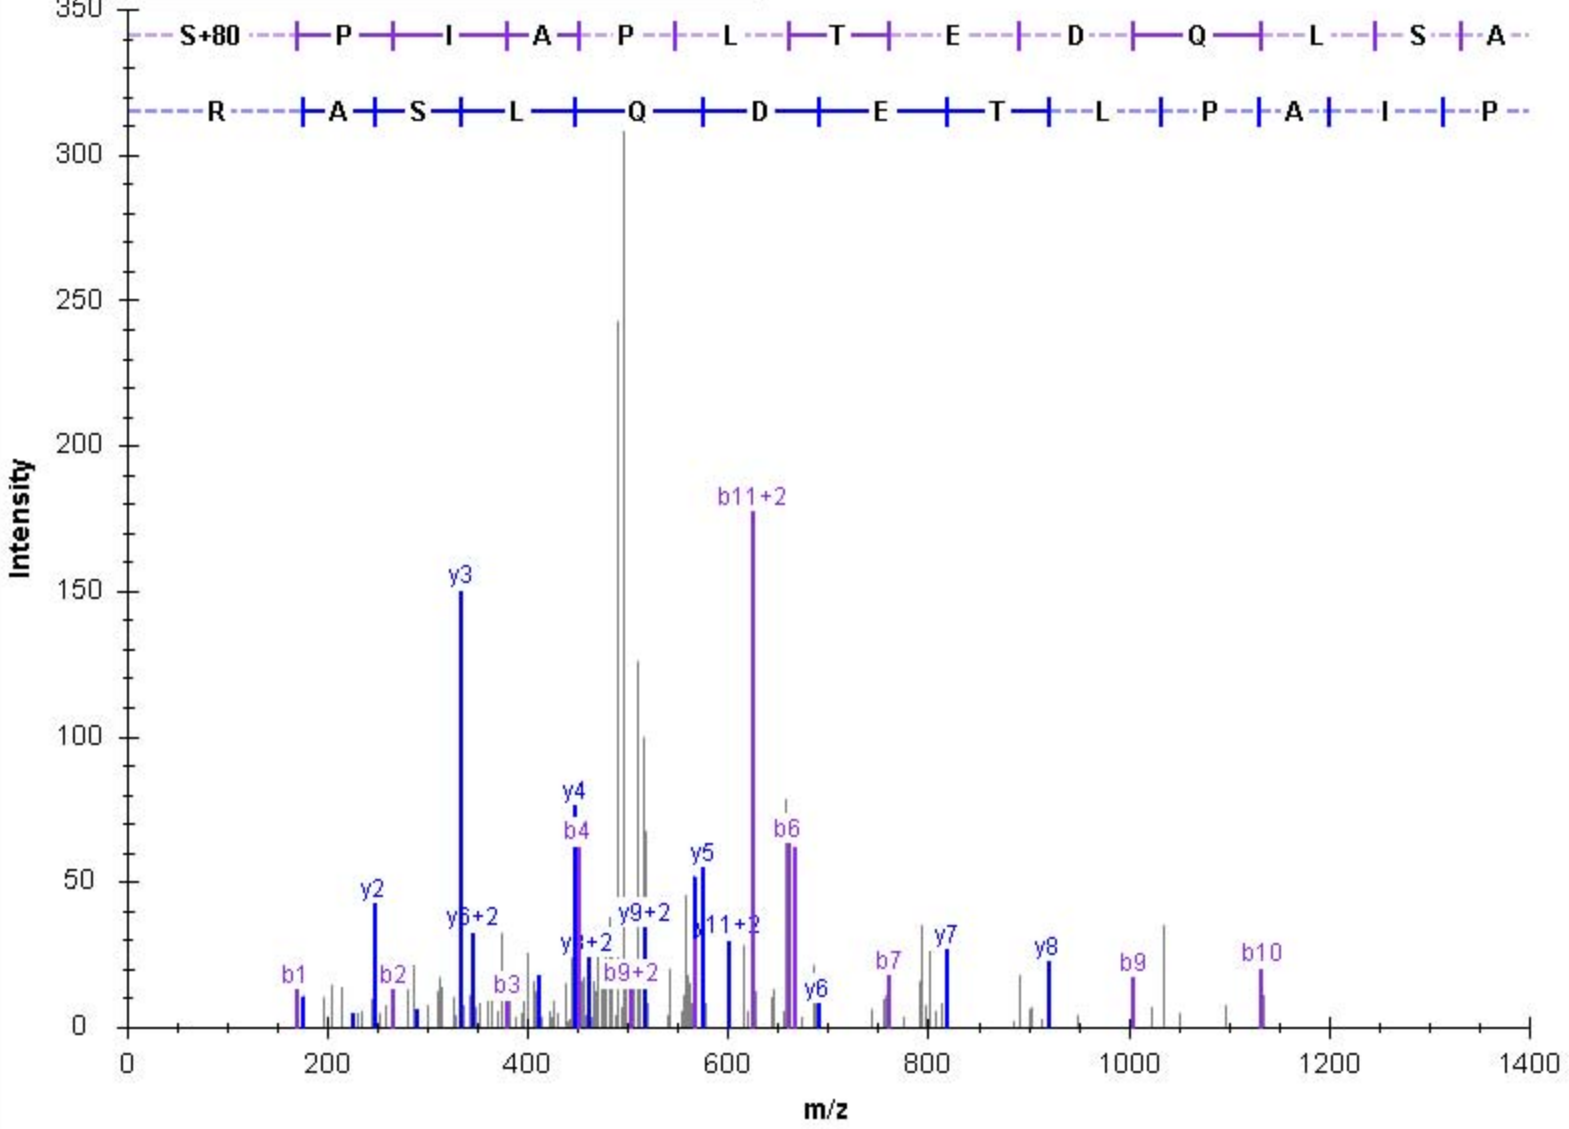

| b               | b(+2)          |    |   |    | y               | y(+2)          |
|-----------------|----------------|----|---|----|-----------------|----------------|
| 58.029          | 29.518         | 1  | G | 18 | 1893.991        | 947.499        |
| 157.097         | 79.052         | 2  | V | 17 | 1836.969        | 918.988        |
| <b>256.166</b>  | 128.586        | 3  | V | 16 | 1737.901        | <b>869.454</b> |
| <b>369.250</b>  | 185.128        | 4  | L | 15 | 1638.832        | <b>819.920</b> |
| <b>456.282</b>  | 228.644        | 5  | S | 14 | 1525.748        | <b>763.378</b> |
| <b>555.350</b>  | 278.179        | 6  | V | 13 | 1438.716        | <b>719.862</b> |
| <b>670.377</b>  | 335.692        | 7  | D | 12 | 1339.648        | <b>670.328</b> |
| <b>771.425</b>  | 386.216        | 8  | T | 11 | 1224.621        | <b>612.814</b> |
| 870.493         | 435.750        | 9  | V | 10 | 1123.573        | <b>562.290</b> |
| <b>971.541</b>  | 486.274        | 10 | T | 9  | <b>1024.505</b> | <b>512.756</b> |
| 1138.573        | <b>569.790</b> | 11 | S | 8  | <b>923.457</b>  | <b>462.232</b> |
| 1235.626        | 618.316        | 12 | P | 7  | <b>756.425</b>  | 378.716        |
| <b>1348.710</b> | <b>674.858</b> | 13 | I | 6  | 659.372         | 330.190        |
| 1435.742        | 718.374        | 14 | S | 5  | <b>546.288</b>  | 273.648        |
| 1563.800        | 782.404        | 15 | Q | 4  | <b>459.256</b>  | 230.132        |
| 1650.832        | <b>825.920</b> | 16 | S | 3  | <b>331.198</b>  | 166.102        |
| 1747.885        | 874.446        | 17 | P | 2  | <b>244.166</b>  | 122.586        |
| 1875.980        | 938.494        | 18 | K | 1  | 147.113         | 74.060         |

controllerType=0 controllerNumber=1 scan=9339

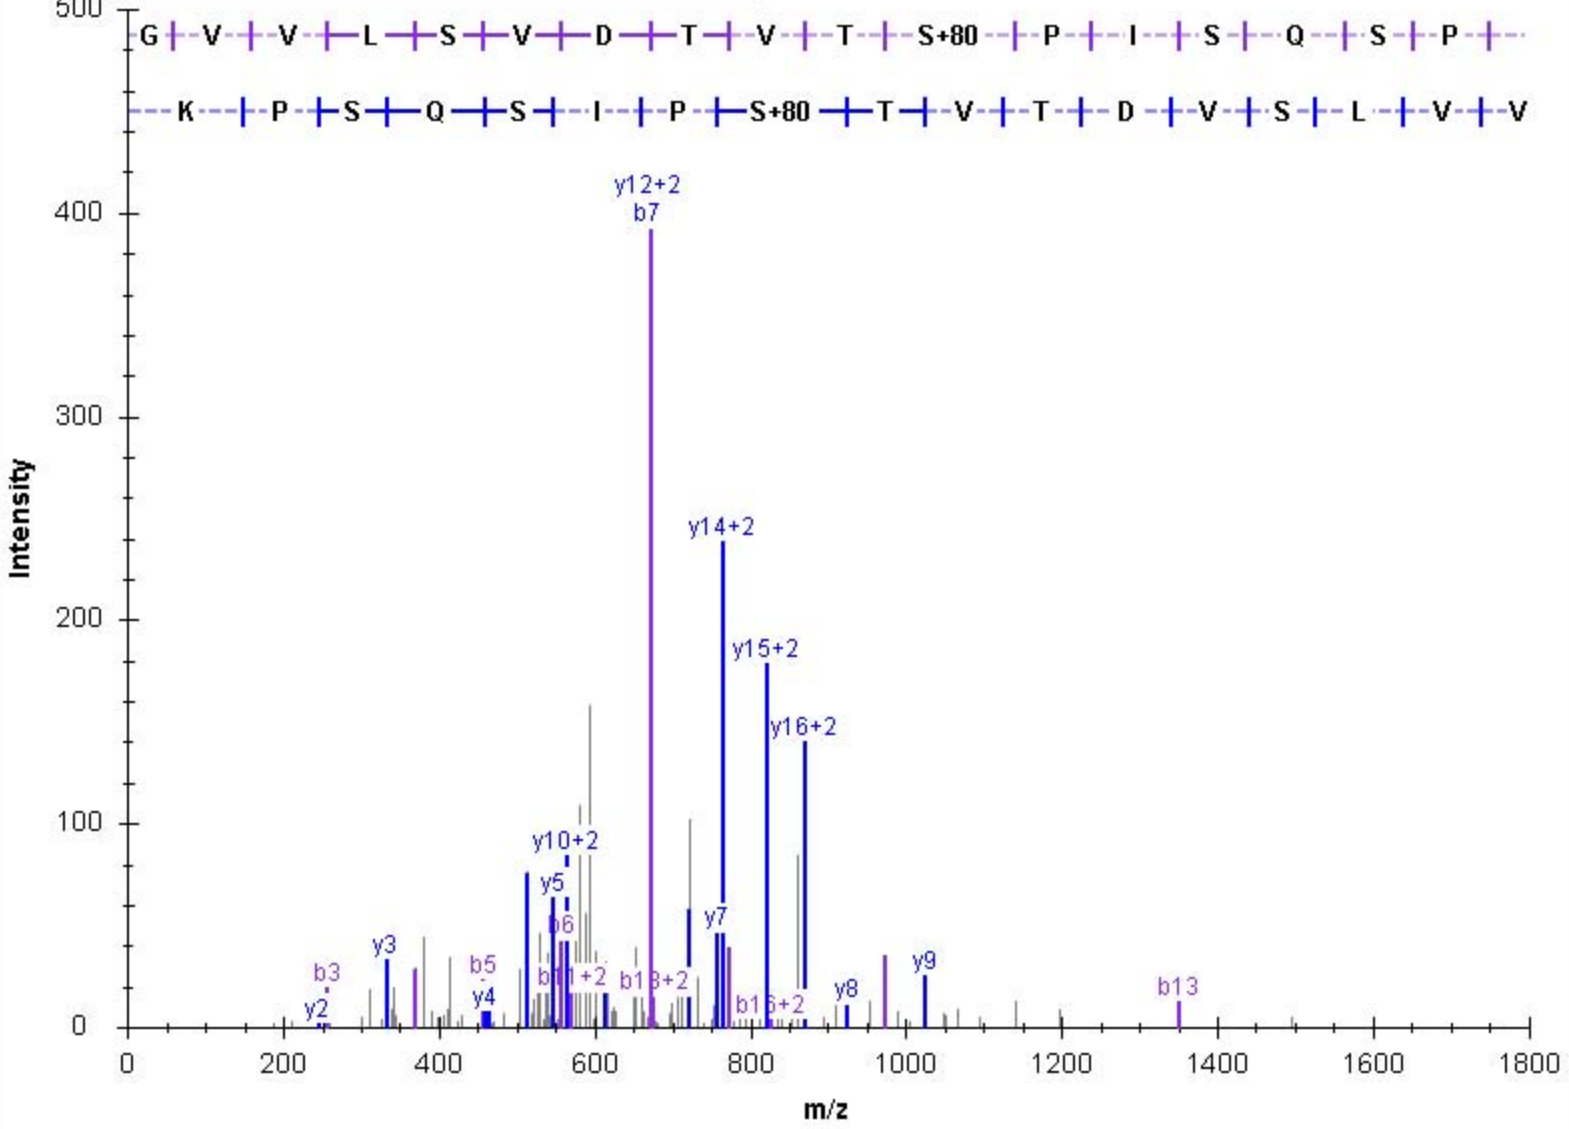



| b               | b(+2)           |    |   | y  | y(+2)           |                 |
|-----------------|-----------------|----|---|----|-----------------|-----------------|
| <b>129.102</b>  | 65.055          | 1  | K | 20 | 2267.128        | <b>1134.068</b> |
| <b>242.186</b>  | 121.597         | 2  | L | 19 | 2139.033        | 1070.020        |
| <b>423.234</b>  | 212.121         | 3  | T | 18 | 2025.949        | <b>1013.478</b> |
| <b>520.287</b>  | 260.647         | 4  | P | 17 | 1844.901        | <b>922.954</b>  |
| <b>701.334</b>  | 351.171         | 5  | T | 16 | 1747.849        | <b>874.428</b>  |
| <b>802.382</b>  | 401.695         | 6  | T | 15 | 1566.801        | <b>783.904</b>  |
| <b>889.414</b>  | 445.211         | 7  | S | 14 | 1465.753        | <b>733.380</b>  |
| <b>986.467</b>  | <b>493.737</b>  | 8  | P | 13 | 1378.721        | <b>689.864</b>  |
| <b>1099.551</b> | <b>550.279</b>  | 9  | I | 12 | <b>1281.669</b> | <b>641.338</b>  |
| <b>1213.594</b> | <b>607.301</b>  | 10 | N | 11 | <b>1168.584</b> | <b>584.796</b>  |
| 1300.626        | <b>650.817</b>  | 11 | S | 10 | <b>1054.542</b> | <b>527.774</b>  |
| 1401.674        | <b>701.340</b>  | 12 | T | 9  | <b>967.509</b>  | 484.258         |
| 1488.706        | <b>744.856</b>  | 13 | S | 8  | <b>866.462</b>  | 433.735         |
| <b>1601.790</b> | 801.398         | 14 | L | 7  | <b>779.430</b>  | <b>390.219</b>  |
| 1688.822        | <b>844.914</b>  | 15 | S | 6  | <b>666.346</b>  | <b>333.676</b>  |
| 1835.890        | <b>918.449</b>  | 16 | F | 5  | <b>579.314</b>  | <b>290.160</b>  |
| 1934.959        | <b>967.983</b>  | 17 | V | 4  | <b>432.245</b>  | 216.626         |
| 2049.985        | <b>1025.496</b> | 18 | D | 3  | <b>333.177</b>  | 167.092         |
| 2121.023        | <b>1061.015</b> | 19 | A | 2  | <b>218.150</b>  | 109.579         |
| 2249.118        | <b>1125.062</b> | 20 | K | 1  | 147.113         | 74.060          |

controllerType=0 controllerNumber=1 scan=8724

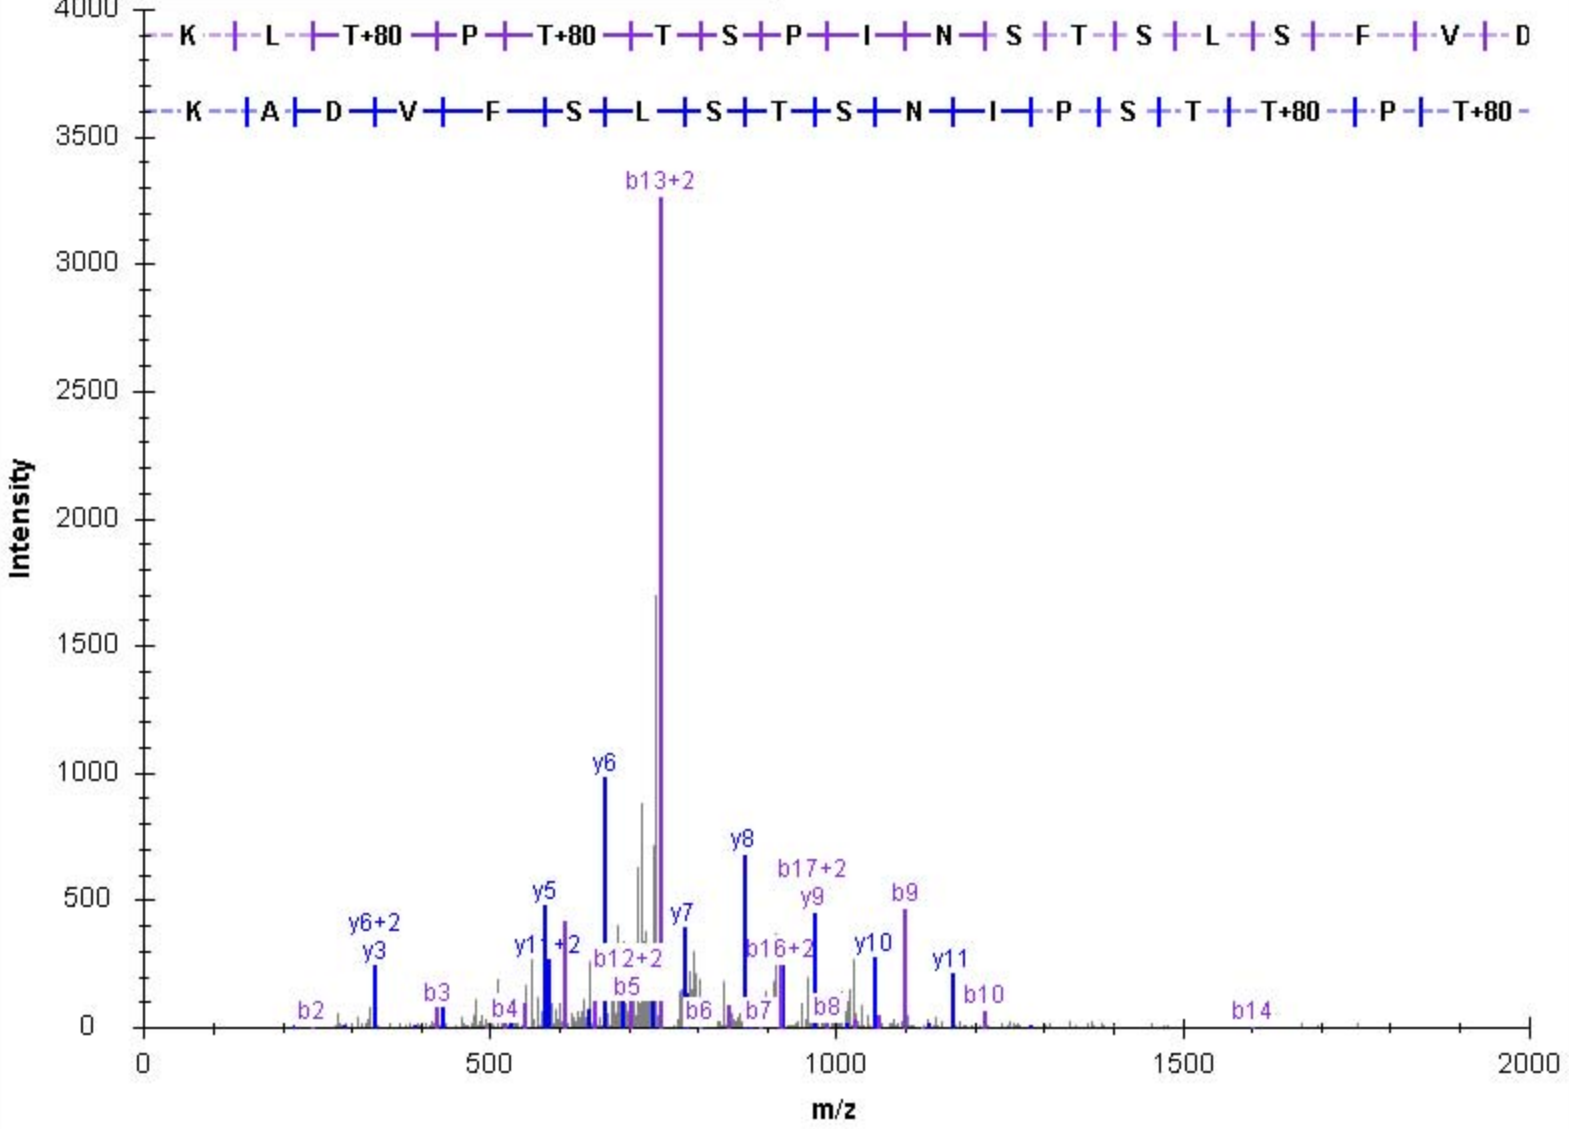

| b               | b(+2)          |    |   |    | y               | y(+2)          |
|-----------------|----------------|----|---|----|-----------------|----------------|
| 132.048         | 66.528         | 1  | M | 12 | 1387.651        | 694.329        |
| <b>231.116</b>  | 116.062        | 2  | V | 11 | 1256.611        | <b>628.809</b> |
| <b>412.164</b>  | 206.586        | 3  | T | 10 | <b>1157.542</b> | <b>579.275</b> |
| <b>469.185</b>  | 235.096        | 4  | G | 9  | <b>976.495</b>  | 488.751        |
| <b>598.228</b>  | 299.618        | 5  | E | 8  | <b>919.473</b>  | <b>460.240</b> |
| 699.276         | 350.141        | 6  | T | 7  | <b>790.431</b>  | 395.719        |
| <b>812.360</b>  | <b>406.683</b> | 7  | L | 6  | 689.383         | <b>345.195</b> |
| <b>911.428</b>  | 456.218        | 8  | V | 5  | <b>576.299</b>  | <b>288.653</b> |
| <b>1026.455</b> | <b>513.731</b> | 9  | D | 4  | <b>477.230</b>  | <b>239.119</b> |
| <b>1113.487</b> | 557.247        | 10 | S | 3  | <b>362.203</b>  | 181.605        |
| 1241.546        | <b>621.276</b> | 11 | Q | 2  | 275.171         | 138.089        |
| 1369.641        | <b>685.324</b> | 12 | K | 1  | 147.113         | 74.060         |

controllerType=0 controllerNumber=1 scan=8753

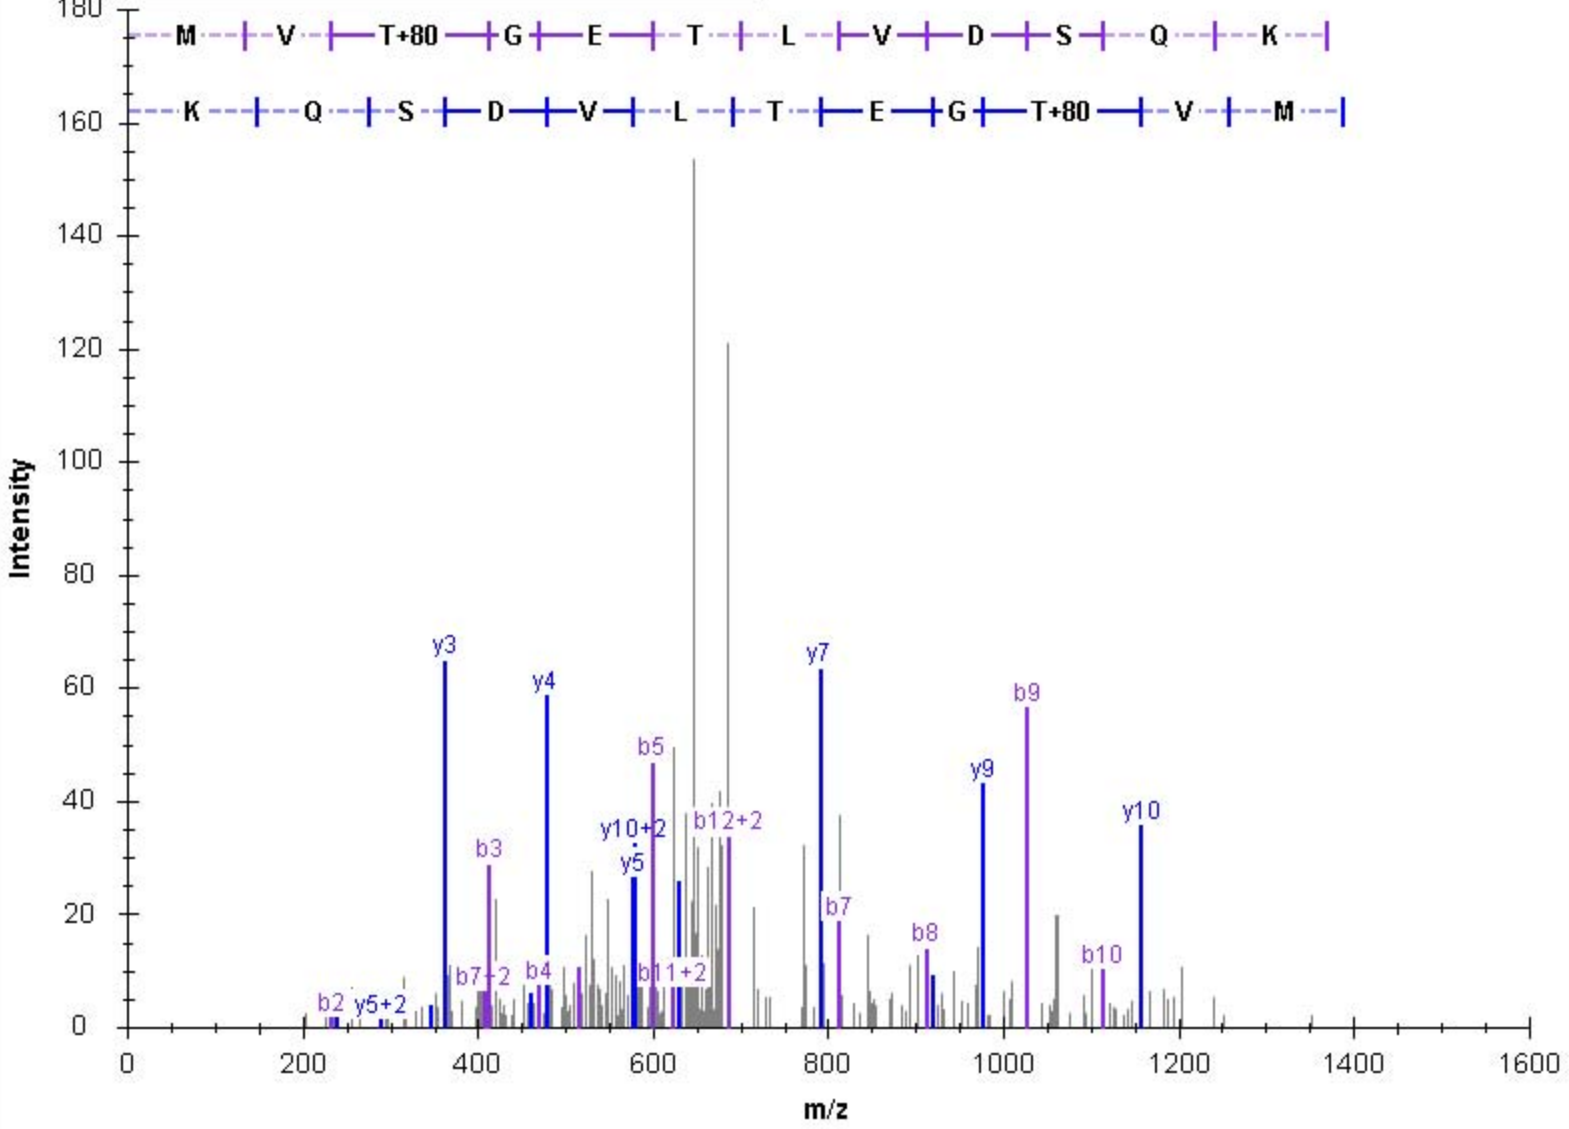

| b               | b(+2)          |    |   |    | y               | y(+2)          |
|-----------------|----------------|----|---|----|-----------------|----------------|
| 132.048         | 66.528         | 1  | M | 12 | 1387.651        | 694.329        |
| 231.116         | 116.062        | 2  | V | 11 | <b>1256.611</b> | 628.809        |
| <b>332.164</b>  | 166.586        | 3  | T | 10 | <b>1157.542</b> | <b>579.275</b> |
| <b>389.185</b>  | 195.096        | 4  | G | 9  | <b>1056.495</b> | 528.751        |
| <b>518.228</b>  | 259.618        | 5  | E | 8  | <b>999.473</b>  | <b>500.240</b> |
| 619.276         | 310.141        | 6  | T | 7  | <b>870.431</b>  | 435.719        |
| <b>732.360</b>  | 366.683        | 7  | L | 6  | <b>769.383</b>  | 385.195        |
| <b>831.428</b>  | 416.218        | 8  | V | 5  | <b>656.299</b>  | 328.653        |
| <b>946.455</b>  | <b>473.731</b> | 9  | D | 4  | <b>557.230</b>  | 279.119        |
| <b>1113.487</b> | <b>557.247</b> | 10 | S | 3  | <b>442.203</b>  | 221.605        |
| 1241.546        | 621.276        | 11 | Q | 2  | 275.171         | 138.089        |
| 1369.641        | <b>685.324</b> | 12 | K | 1  | 147.113         | 74.060         |

controllerType=0 controllerNumber=1 scan=6153

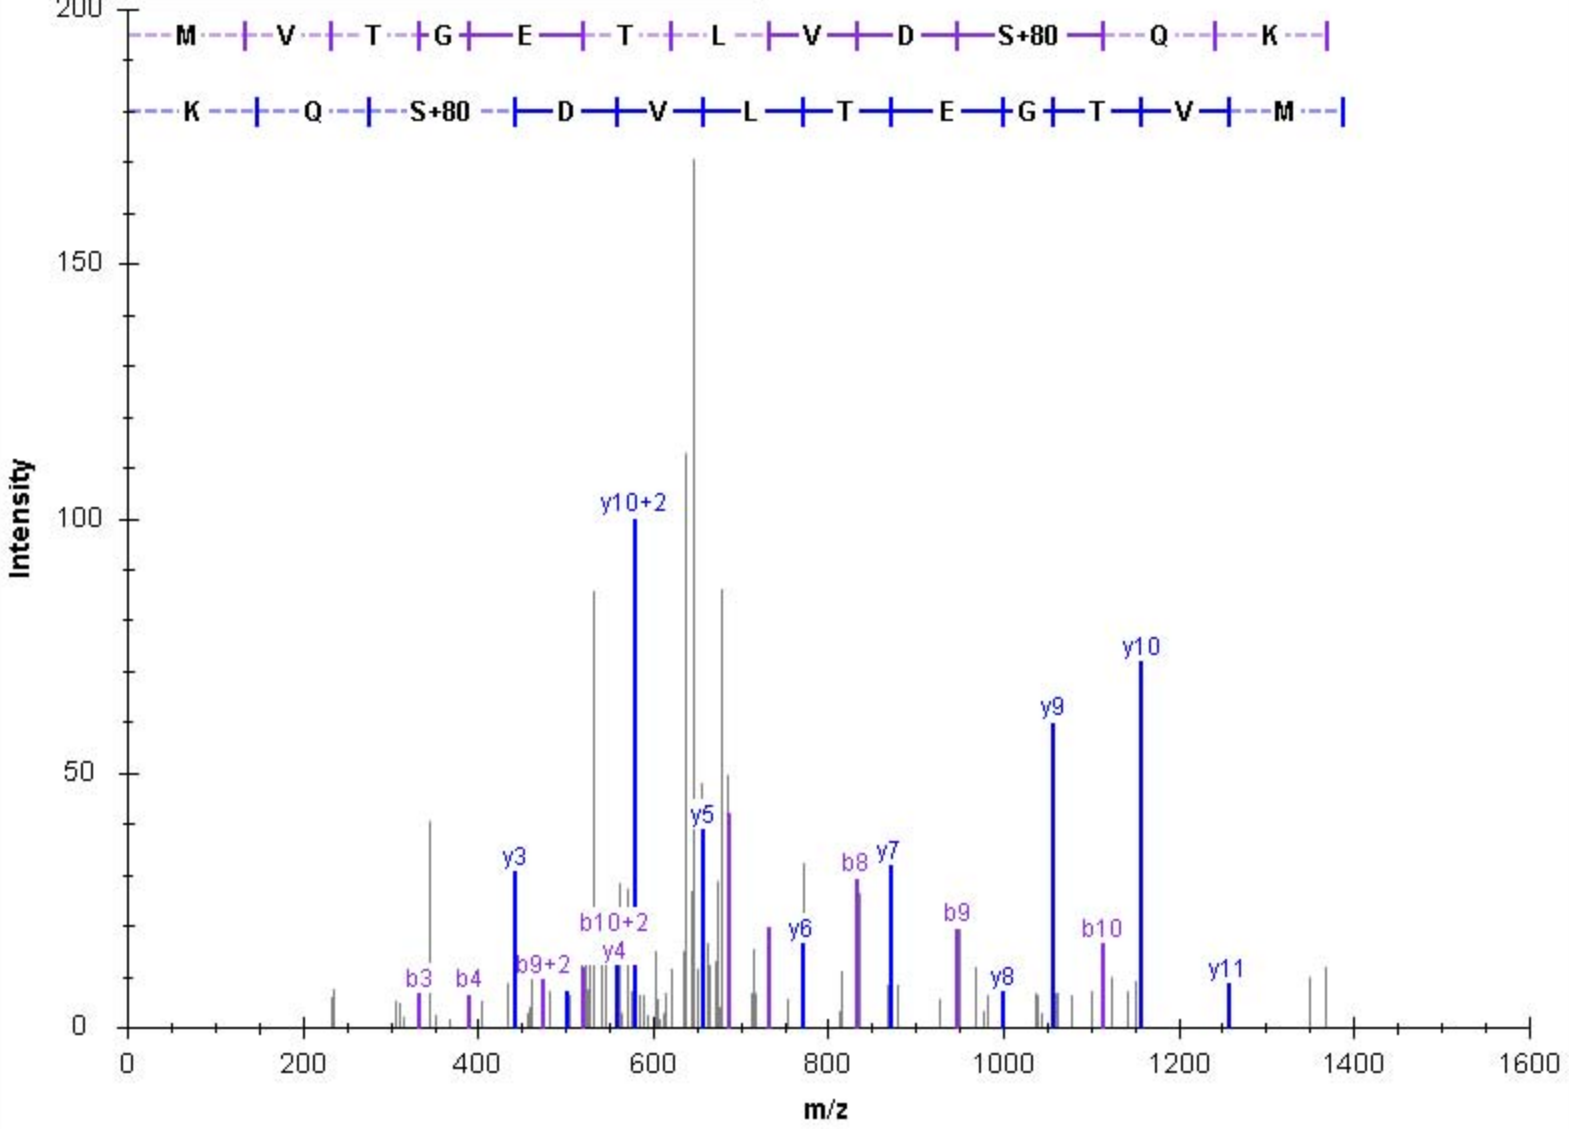

| b               | b(+2)           |    |   | y  | y(+2)           |                 |
|-----------------|-----------------|----|---|----|-----------------|-----------------|
| <b>132.048</b>  | 66.528          | 1  | M | 24 | 2742.360        | 1371.684        |
| 231.116         | 116.062         | 2  | V | 23 | 2611.320        | 1306.164        |
| 332.164         | 166.586         | 3  | T | 22 | 2512.251        | <b>1256.629</b> |
| 389.185         | 195.096         | 4  | G | 21 | 2411.204        | 1206.106        |
| <b>518.228</b>  | 259.618         | 5  | E | 20 | 2354.182        | <b>1177.595</b> |
| <b>619.276</b>  | 310.141         | 6  | T | 19 | 2225.140        | <b>1113.074</b> |
| 732.360         | 366.683         | 7  | L | 18 | 2124.092        | 1062.550        |
| <b>831.428</b>  | 416.218         | 8  | V | 17 | 2011.008        | <b>1006.008</b> |
| <b>946.455</b>  | 473.731         | 9  | D | 16 | 1911.940        | <b>956.473</b>  |
| <b>1113.487</b> | 557.247         | 10 | S | 15 | 1796.913        | <b>898.960</b>  |
| <b>1241.546</b> | <b>621.276</b>  | 11 | Q | 14 | 1629.881        | 815.444         |
| 1369.641        | 685.324         | 12 | K | 13 | 1501.822        | <b>751.415</b>  |
| 1456.673        | 728.840         | 13 | S | 12 | 1373.727        | 687.367         |
| <b>1569.757</b> | <b>785.382</b>  | 14 | L | 11 | 1286.695        | 643.851         |
| <b>1682.841</b> | <b>841.924</b>  | 15 | I | 10 | <b>1173.611</b> | <b>587.309</b>  |
| 1796.884        | <b>898.945</b>  | 16 | N | 9  | <b>1060.527</b> | <b>530.767</b>  |
| 1910.927        | <b>955.967</b>  | 17 | N | 8  | <b>946.484</b>  | 473.746         |
| 2025.954        | <b>1013.480</b> | 18 | D | 7  | <b>832.441</b>  | 416.724         |
| 2127.001        | <b>1064.004</b> | 19 | T | 6  | <b>717.414</b>  | 359.211         |
| 2240.085        | <b>1120.546</b> | 20 | L | 5  | <b>616.366</b>  | 308.687         |
| 2353.169        | <b>1177.088</b> | 21 | L | 4  | <b>503.282</b>  | 252.145         |
| 2467.212        | <b>1234.110</b> | 22 | N | 3  | <b>390.198</b>  | 195.603         |
| 2596.255        | 1298.631        | 23 | E | 2  | 276.155         | 138.581         |
| 2724.350        | 1362.679        | 24 | K | 1  | 147.113         | 74.060          |

controllerType=0 controllerNumber=1 scan=13287

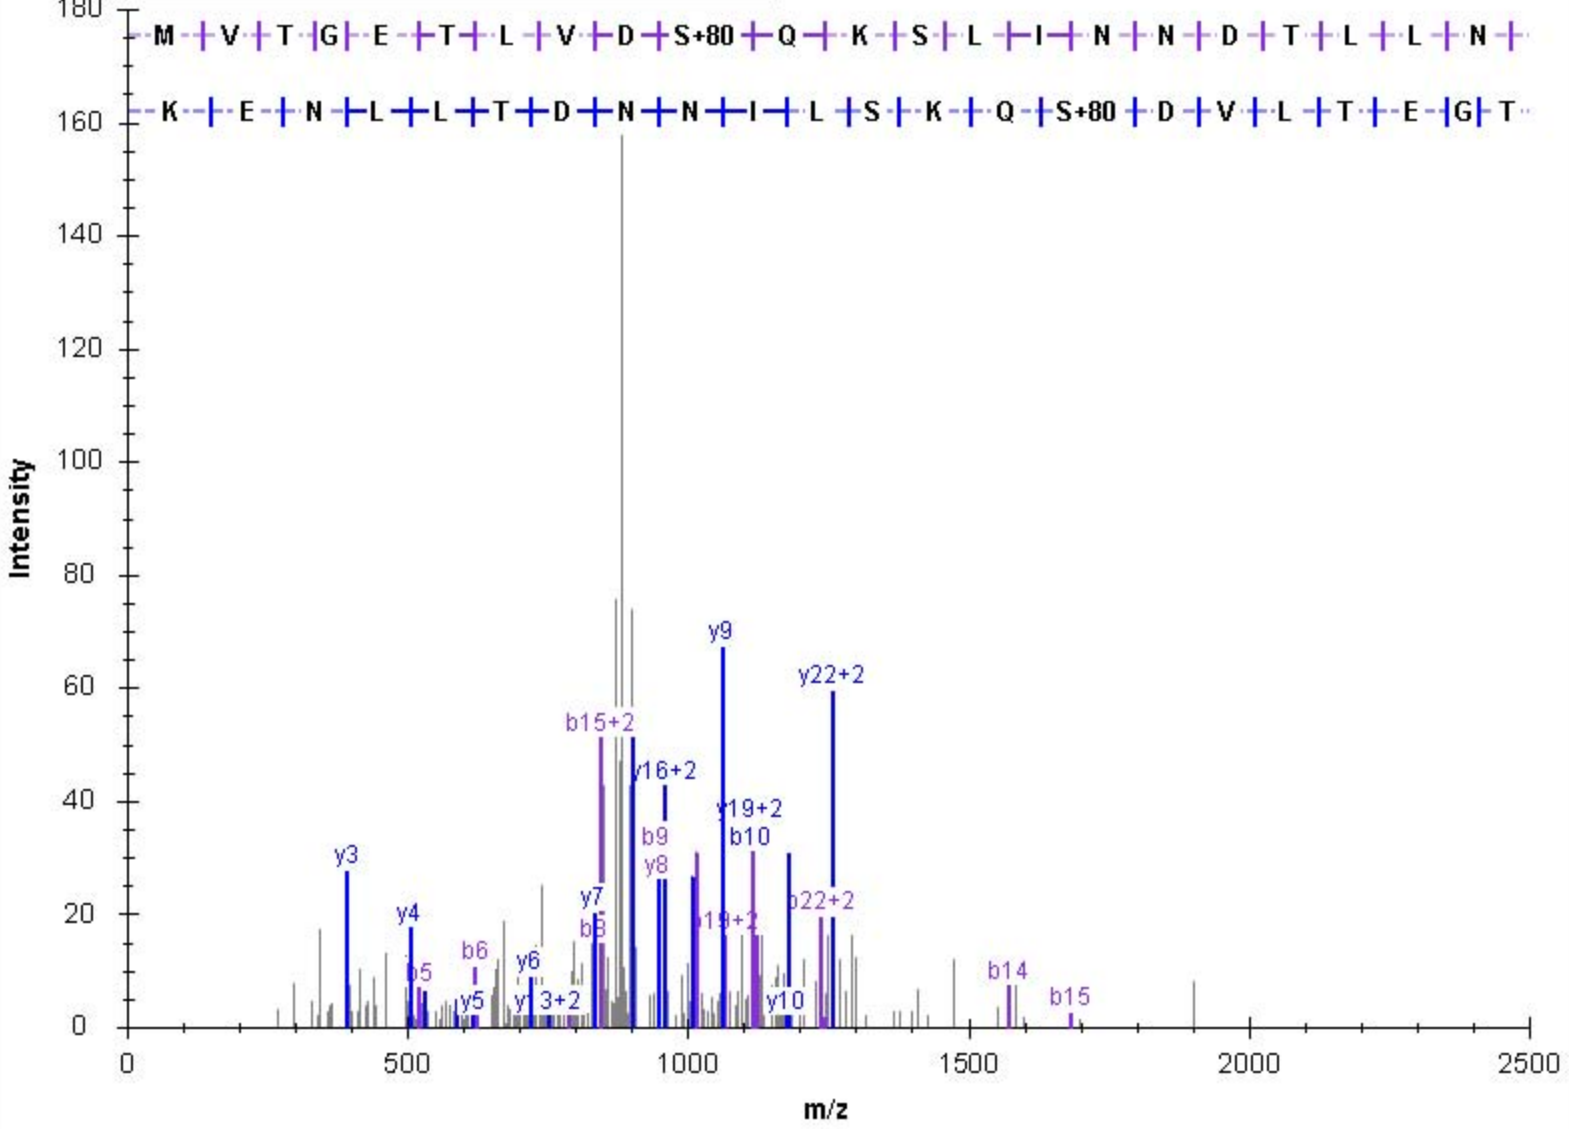



| b               | b(+2)          |    |   |    | y               | y(+2)          |
|-----------------|----------------|----|---|----|-----------------|----------------|
| 88.039          | 44.523         | 1  | S | 12 | 1453.727        | 727.367        |
| 201.123         | 101.065        | 2  | L | 11 | 1366.695        | <b>683.851</b> |
| <b>314.207</b>  | 157.607        | 3  | I | 10 | <b>1253.611</b> | <b>627.309</b> |
| <b>428.250</b>  | 214.629        | 4  | N | 9  | <b>1140.527</b> | <b>570.767</b> |
| <b>542.293</b>  | 271.650        | 5  | N | 8  | <b>1026.484</b> | <b>513.746</b> |
| <b>657.320</b>  | 329.164        | 6  | D | 7  | <b>912.441</b>  | 456.724        |
| <b>838.368</b>  | <b>419.688</b> | 7  | T | 6  | <b>797.414</b>  | 399.211        |
| <b>951.452</b>  | <b>476.230</b> | 8  | L | 5  | <b>616.366</b>  | 308.687        |
| <b>1064.536</b> | <b>532.772</b> | 9  | L | 4  | <b>503.282</b>  | 252.145        |
| <b>1178.579</b> | <b>589.793</b> | 10 | N | 3  | <b>390.198</b>  | 195.603        |
| <b>1307.622</b> | <b>654.314</b> | 11 | E | 2  | <b>276.155</b>  | 138.581        |
| 1435.717        | <b>718.362</b> | 12 | K | 1  | 147.113         | 74.060         |

controllerType=0 controllerNumber=1 scan=10353

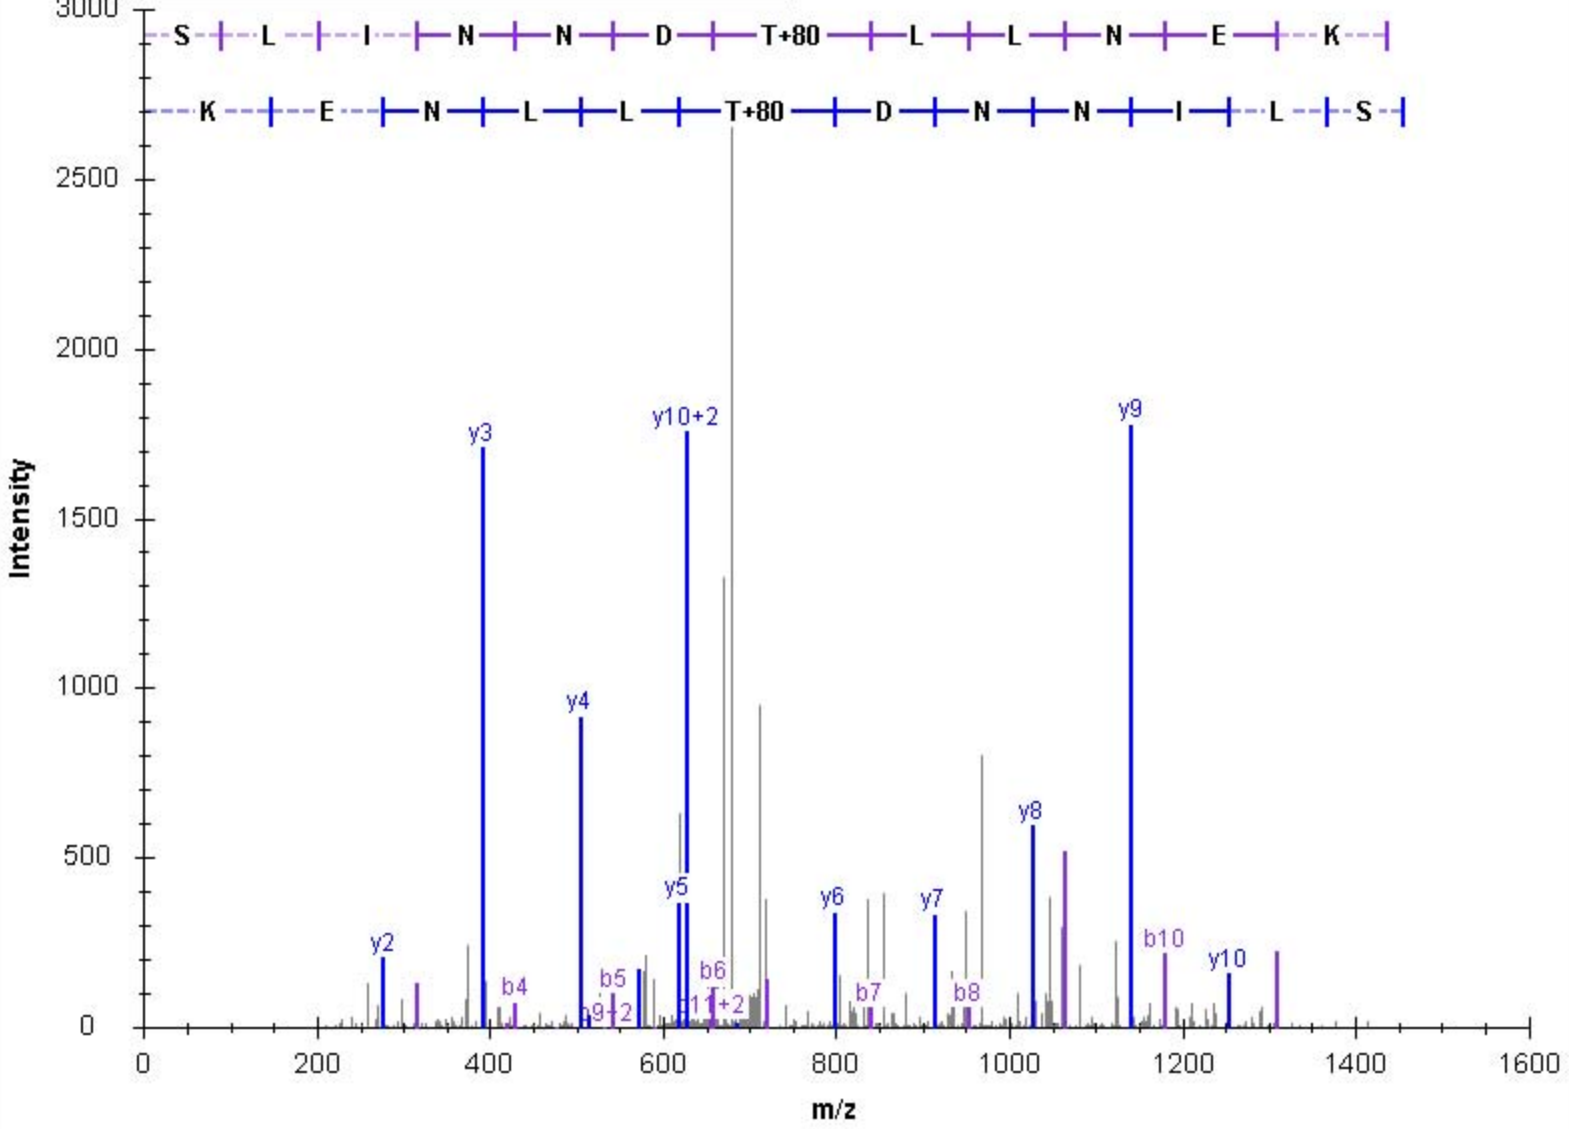

| b               | b(+2)           |    |   |    | y               | y(+2)           |
|-----------------|-----------------|----|---|----|-----------------|-----------------|
| <b>161.016</b>  | 81.012          | 1  | C | 19 | 2402.057        | 1201.532        |
| 308.085         | 154.546         | 2  | F | 18 | 2242.047        | 1121.527        |
| <b>471.148</b>  | 236.078         | 3  | Y | 17 | 2094.979        | <b>1047.993</b> |
| 585.191         | 293.099         | 4  | N | 16 | <b>1931.916</b> | 966.461         |
| <b>698.275</b>  | 349.641         | 5  | L | 15 | <b>1817.873</b> | <b>909.440</b>  |
| <b>826.334</b>  | 413.671         | 6  | Q | 14 | 1704.789        | 852.898         |
| <b>973.402</b>  | 487.205         | 7  | F | 13 | <b>1576.730</b> | 788.869         |
| <b>1104.443</b> | 552.725         | 8  | M | 12 | <b>1429.662</b> | 715.334         |
| <b>1218.486</b> | 609.746         | 9  | N | 11 | <b>1298.621</b> | <b>649.814</b>  |
| <b>1347.528</b> | <b>674.268</b>  | 10 | E | 10 | <b>1184.578</b> | 592.793         |
| 1444.581        | <b>722.794</b>  | 11 | P | 9  | <b>1055.536</b> | <b>528.271</b>  |
| <b>1543.649</b> | 772.328         | 12 | V | 8  | 958.483         | <b>479.745</b>  |
| <b>1710.681</b> | <b>855.844</b>  | 13 | S | 7  | <b>859.415</b>  | 430.211         |
| <b>1811.729</b> | <b>906.368</b>  | 14 | T | 6  | <b>692.382</b>  | 346.695         |
| <b>1912.777</b> | <b>956.892</b>  | 15 | T | 5  | <b>591.335</b>  | 296.171         |
| 2041.819        | <b>1021.413</b> | 16 | E | 4  | <b>490.287</b>  | 245.647         |
| 2154.903        | 1077.955        | 17 | L | 3  | <b>361.245</b>  | 181.126         |
| 2255.951        | <b>1128.479</b> | 18 | T | 2  | 248.160         | 124.584         |
| 2384.046        | 1192.527        | 19 | K | 1  | 147.113         | 74.060          |

controllerType=0 controllerNumber=1 scan=12713

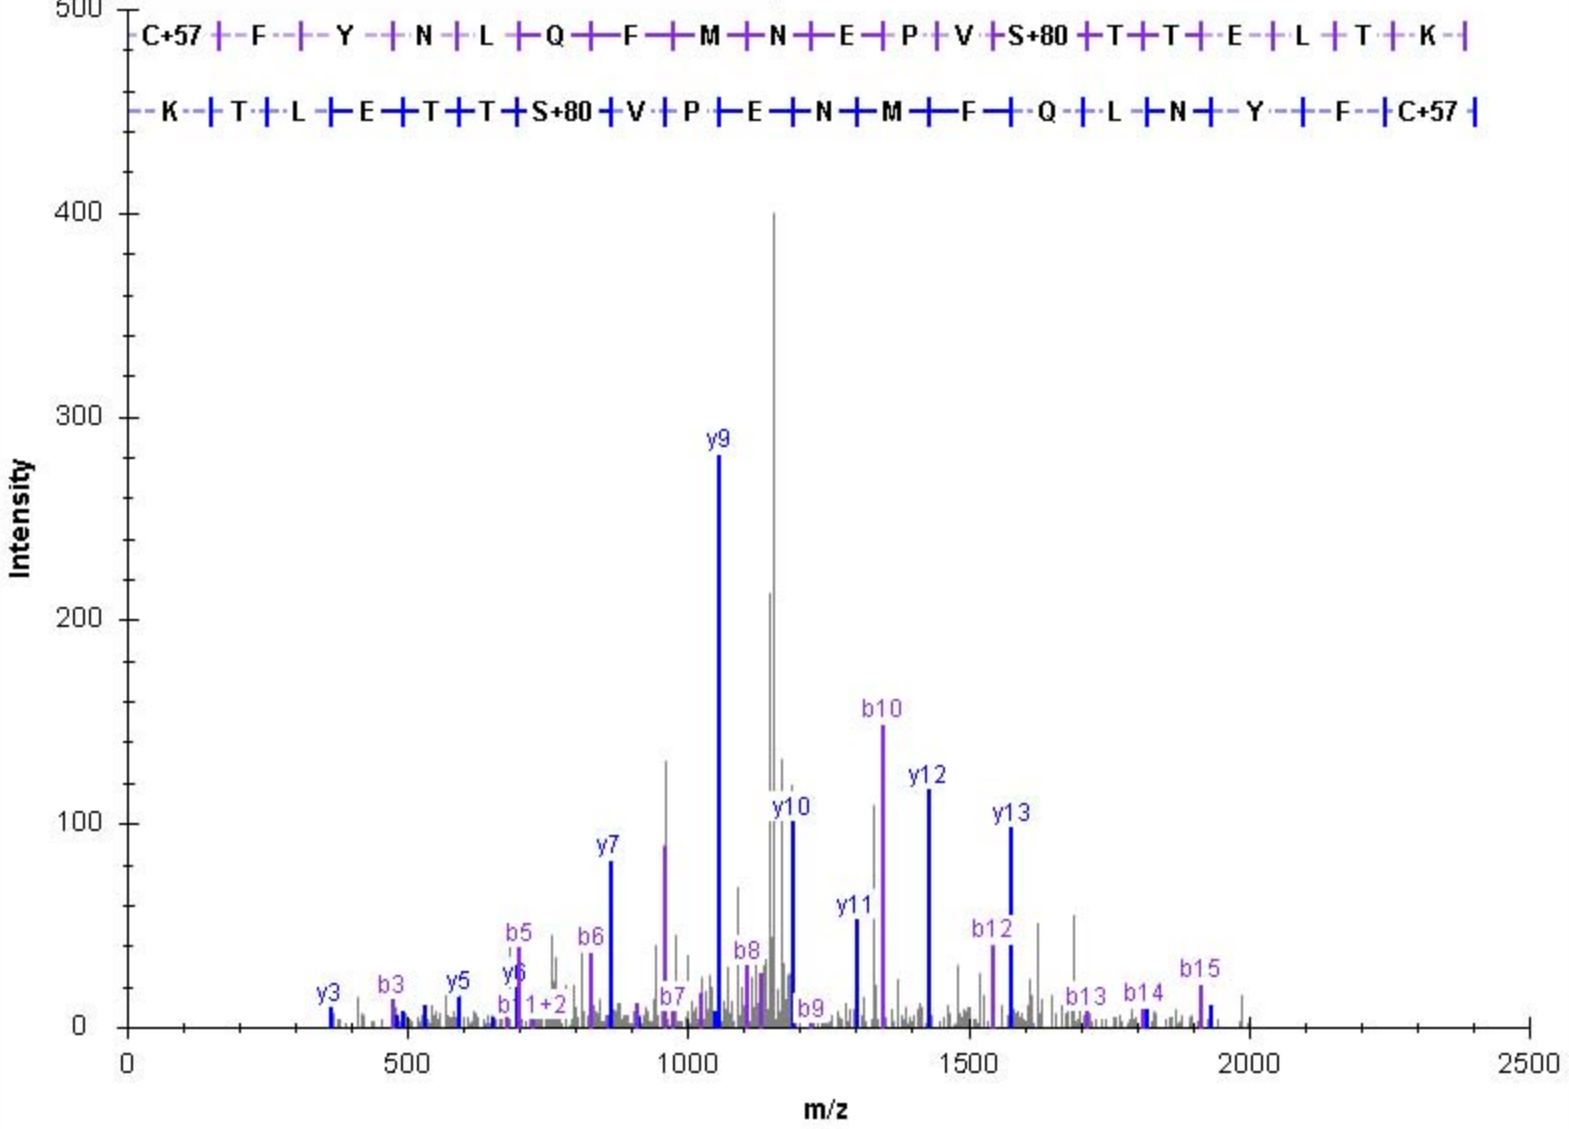

| b               | b(+2)          |    |   |    | y               | y(+2)          |
|-----------------|----------------|----|---|----|-----------------|----------------|
| 130.050         | 65.529         | 1  | E | 13 | 1533.801        | 767.404        |
| 201.087         | 101.047        | 2  | A | 12 | 1404.758        | <b>702.883</b> |
| <b>314.171</b>  | 157.589        | 3  | L | 11 | <b>1333.721</b> | <b>667.364</b> |
| <b>428.214</b>  | 214.611        | 4  | N | 10 | <b>1220.637</b> | <b>610.822</b> |
| <b>525.267</b>  | 263.137        | 5  | P | 9  | <b>1106.594</b> | <b>553.801</b> |
| <b>692.299</b>  | 346.653        | 6  | S | 8  | <b>1009.541</b> | <b>505.274</b> |
| <b>805.383</b>  | 403.195        | 7  | I | 7  | <b>842.509</b>  | 421.758        |
| <b>933.441</b>  | <b>467.224</b> | 8  | Q | 6  | <b>729.425</b>  | <b>365.216</b> |
| <b>1046.525</b> | 523.766        | 9  | L | 5  | <b>601.367</b>  | <b>301.187</b> |
| <b>1117.563</b> | <b>559.285</b> | 10 | A | 4  | <b>488.283</b>  | 244.645        |
| <b>1246.605</b> | <b>623.806</b> | 11 | E | 3  | <b>417.246</b>  | 209.126        |
| <b>1359.689</b> | <b>680.348</b> | 12 | L | 2  | <b>288.203</b>  | 144.605        |
| 1515.790        | <b>758.399</b> | 13 | R | 1  | 175.119         | 88.063         |

controllerType=0 controllerNumber=1 scan=11314

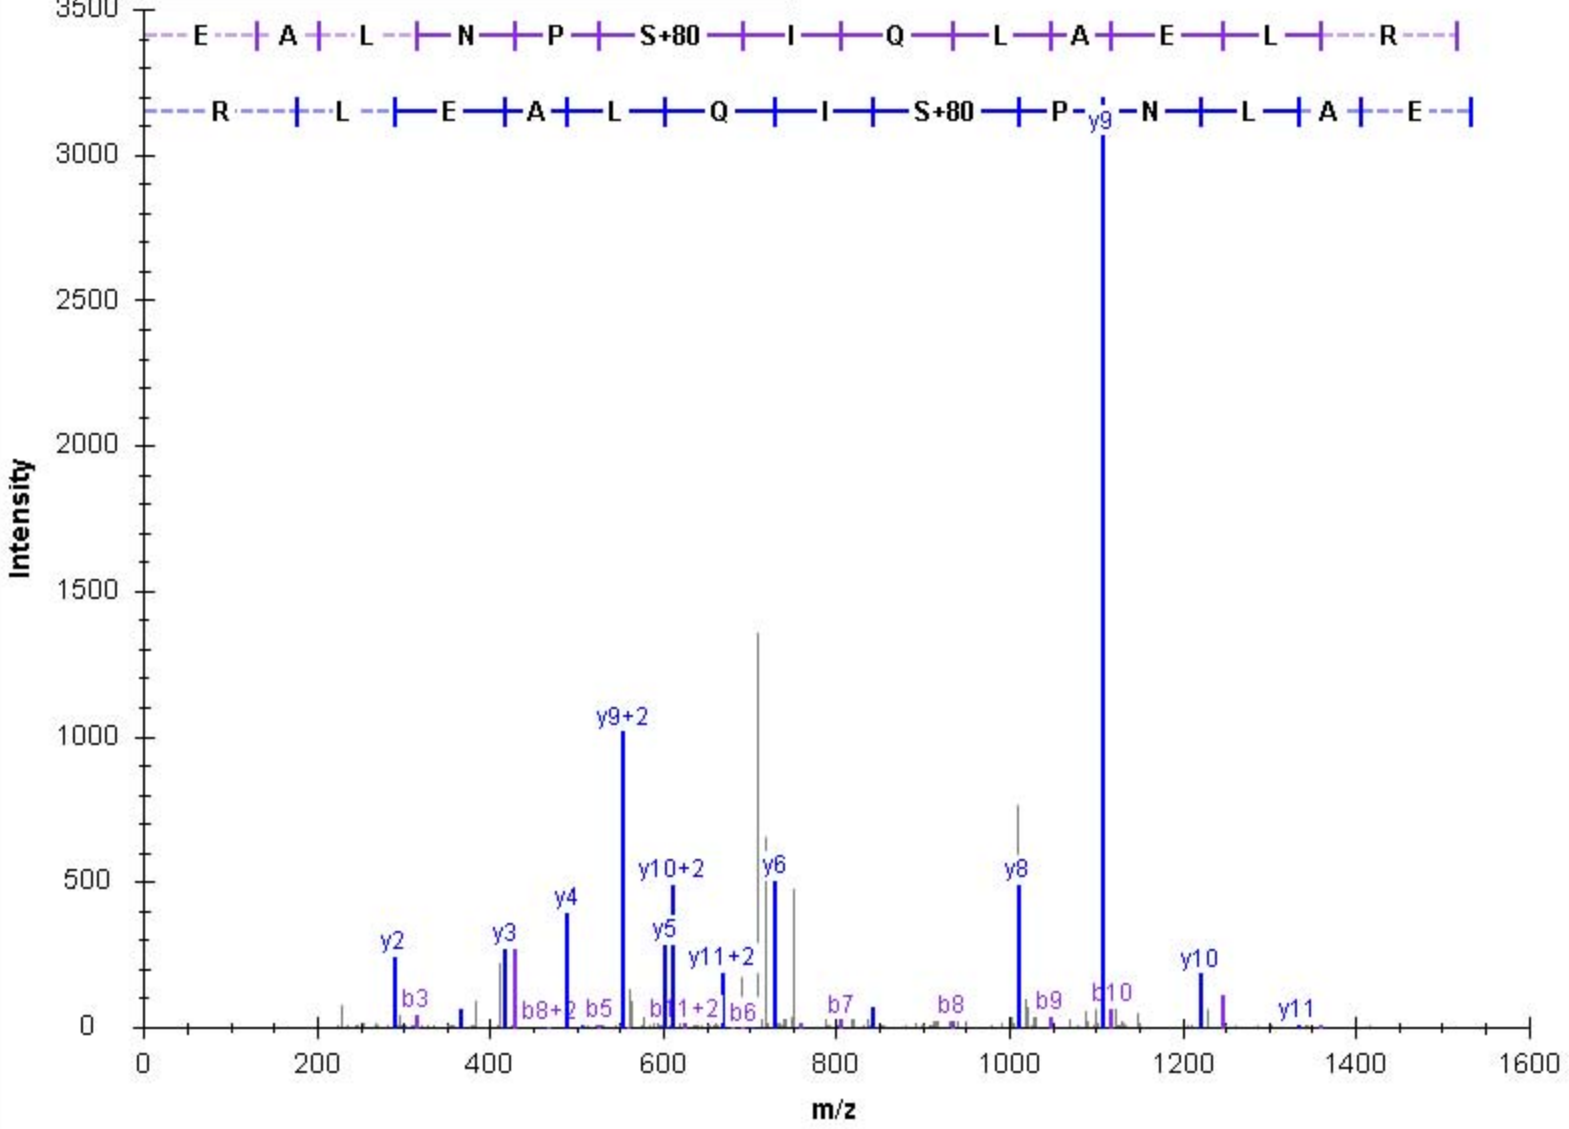

| b               | b(+2)          |    |   |    | y               | y(+2)          |
|-----------------|----------------|----|---|----|-----------------|----------------|
| 100.076         | 50.541         | 1  | V | 16 | 1900.863        | 950.935        |
| 229.118         | 115.063        | 2  | E | 15 | 1801.795        | 901.401        |
| <b>396.150</b>  | 198.579        | 3  | S | 14 | <b>1672.752</b> | <b>836.880</b> |
| 493.203         | 247.105        | 4  | P | 13 | <b>1505.720</b> | <b>753.364</b> |
| <b>592.271</b>  | 296.639        | 5  | V | 12 | <b>1408.668</b> | <b>704.837</b> |
| <b>706.314</b>  | 353.661        | 6  | N | 11 | <b>1309.599</b> | 655.303        |
| <b>835.357</b>  | 418.182        | 7  | E | 10 | <b>1195.556</b> | 598.282        |
| 948.441         | 474.724        | 8  | L | 9  | <b>1066.514</b> | 533.760        |
| <b>1062.484</b> | 531.746        | 9  | N | 8  | 953.430         | 477.218        |
| <b>1149.516</b> | 575.262        | 10 | S | 7  | <b>839.387</b>  | 420.197        |
| <b>1250.564</b> | 625.785        | 11 | T | 6  | <b>752.355</b>  | <b>376.681</b> |
| <b>1397.604</b> | 699.306        | 12 | M | 5  | <b>651.307</b>  | 326.157        |
| <b>1526.647</b> | 763.827        | 13 | E | 4  | <b>504.266</b>  | 252.637        |
| <b>1655.689</b> | <b>828.348</b> | 14 | E | 3  | <b>375.224</b>  | 188.116        |
| <b>1754.758</b> | 877.883        | 15 | V | 2  | 246.181         | 123.594        |
| 1882.853        | 941.930        | 16 | K | 1  | 147.113         | 74.060         |

controllerType=0 controllerNumber=1 scan=9618

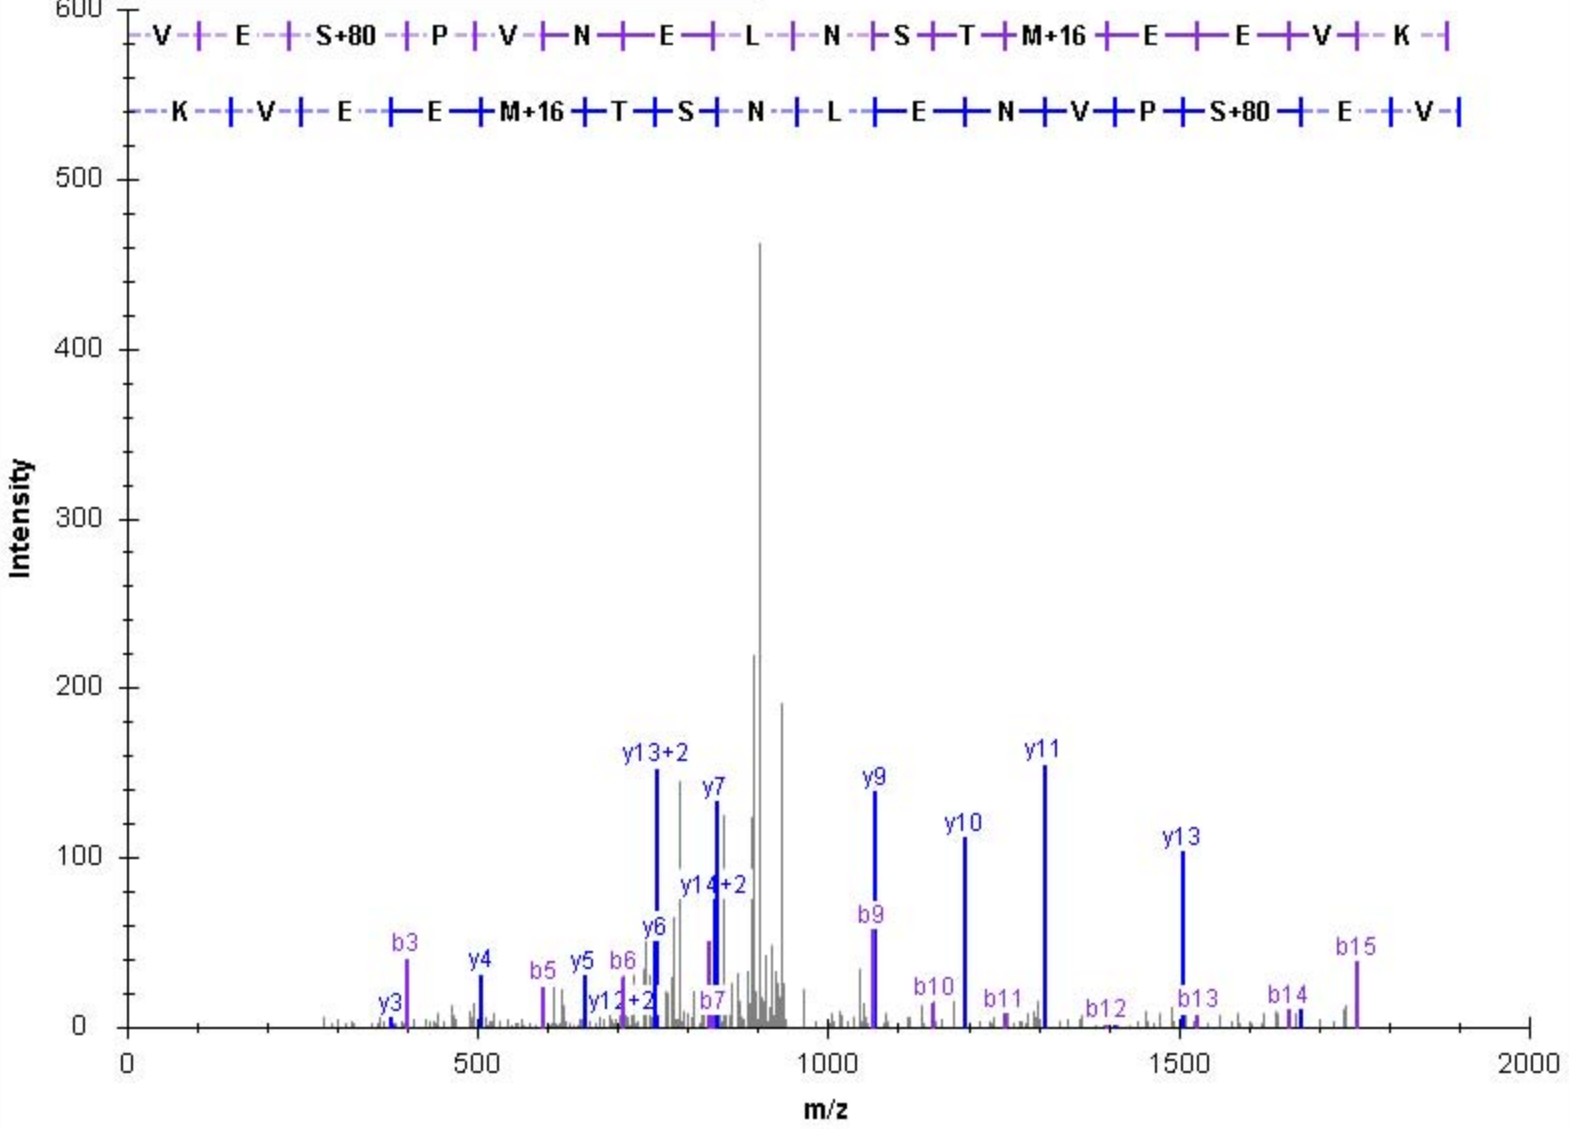



| b               | b(+2)           |    |   | y  | y(+2)           |                 |
|-----------------|-----------------|----|---|----|-----------------|-----------------|
| <b>182.055</b>  | 91.531          | 1  | T | 37 | 4199.873        | 2100.440        |
| 329.123         | 165.065         | 2  | F | 36 | 4018.826        | 2009.916        |
| 430.171         | 215.589         | 3  | T | 35 | 3871.757        | <b>1936.382</b> |
| 558.230         | 279.618         | 4  | Q | 34 | 3770.709        | <b>1885.858</b> |
| <b>645.262</b>  | 323.134         | 5  | S | 33 | 3642.651        | <b>1821.829</b> |
| <b>774.304</b>  | 387.656         | 6  | E | 32 | 3555.619        | <b>1778.313</b> |
| <b>887.388</b>  | 444.198         | 7  | L | 31 | 3426.576        | <b>1713.792</b> |
| 974.420         | 487.714         | 8  | S | 30 | 3313.492        | <b>1657.250</b> |
| <b>1075.468</b> | 538.238         | 9  | T | 29 | 3226.460        | <b>1613.734</b> |
| <b>1132.489</b> | <b>566.748</b>  | 10 | G | 28 | 3125.412        | <b>1563.210</b> |
| <b>1247.516</b> | 624.262         | 11 | D | 27 | 3068.391        | <b>1534.699</b> |
| <b>1360.600</b> | <b>680.804</b>  | 12 | I | 26 | 2953.364        | <b>1477.186</b> |
| <b>1473.685</b> | <b>737.346</b>  | 13 | I | 25 | 2840.280        | <b>1420.644</b> |
| <b>1633.694</b> | 817.351         | 14 | C | 24 | 2727.196        | <b>1364.102</b> |
| <b>1780.762</b> | 890.885         | 15 | F | 23 | 2567.187        | <b>1284.097</b> |
| <b>1909.805</b> | 955.406         | 16 | E | 22 | 2420.118        | <b>1210.563</b> |
| 2006.858        | 1003.932        | 17 | P | 21 | 2291.076        | <b>1146.042</b> |
| 2166.867        | 1083.937        | 18 | C | 20 | 2194.023        | 1097.515        |
| 2322.968        | <b>1161.988</b> | 19 | R | 19 | 2034.014        | <b>1017.511</b> |
| 2420.021        | <b>1210.514</b> | 20 | P | 18 | <b>1877.913</b> | <b>939.460</b>  |
| 2507.053        | 1254.030        | 21 | S | 17 | <b>1780.860</b> | 890.934         |
| 2578.090        | 1289.548        | 22 | A | 16 | <b>1693.828</b> | <b>847.418</b>  |
| 2691.174        | <b>1346.091</b> | 23 | L | 15 | <b>1622.791</b> | 811.899         |
| 2820.216        | <b>1410.612</b> | 24 | E | 14 | <b>1509.707</b> | <b>755.357</b>  |
| 2935.243        | <b>1468.125</b> | 25 | D | 13 | <b>1380.664</b> | 690.836         |
| 3050.270        | 1525.639        | 26 | D | 12 | <b>1265.637</b> | 633.322         |
| 3163.354        | <b>1582.181</b> | 27 | I | 11 | <b>1150.610</b> | <b>575.809</b>  |
| 3262.423        | <b>1631.715</b> | 28 | V | 10 | <b>1037.526</b> | 519.267         |
| 3376.466        | <b>1688.736</b> | 29 | N | 9  | <b>938.458</b>  | 469.733         |
| 3463.498        | <b>1732.252</b> | 30 | S | 8  | <b>824.415</b>  | 412.711         |
| 3520.519        | 1760.763        | 31 | G | 7  | <b>737.383</b>  | 369.195         |
| 3667.588        | <b>1834.297</b> | 32 | F | 6  | <b>680.361</b>  | 340.684         |

controllerType=0 controllerNumber=1 scan=15470

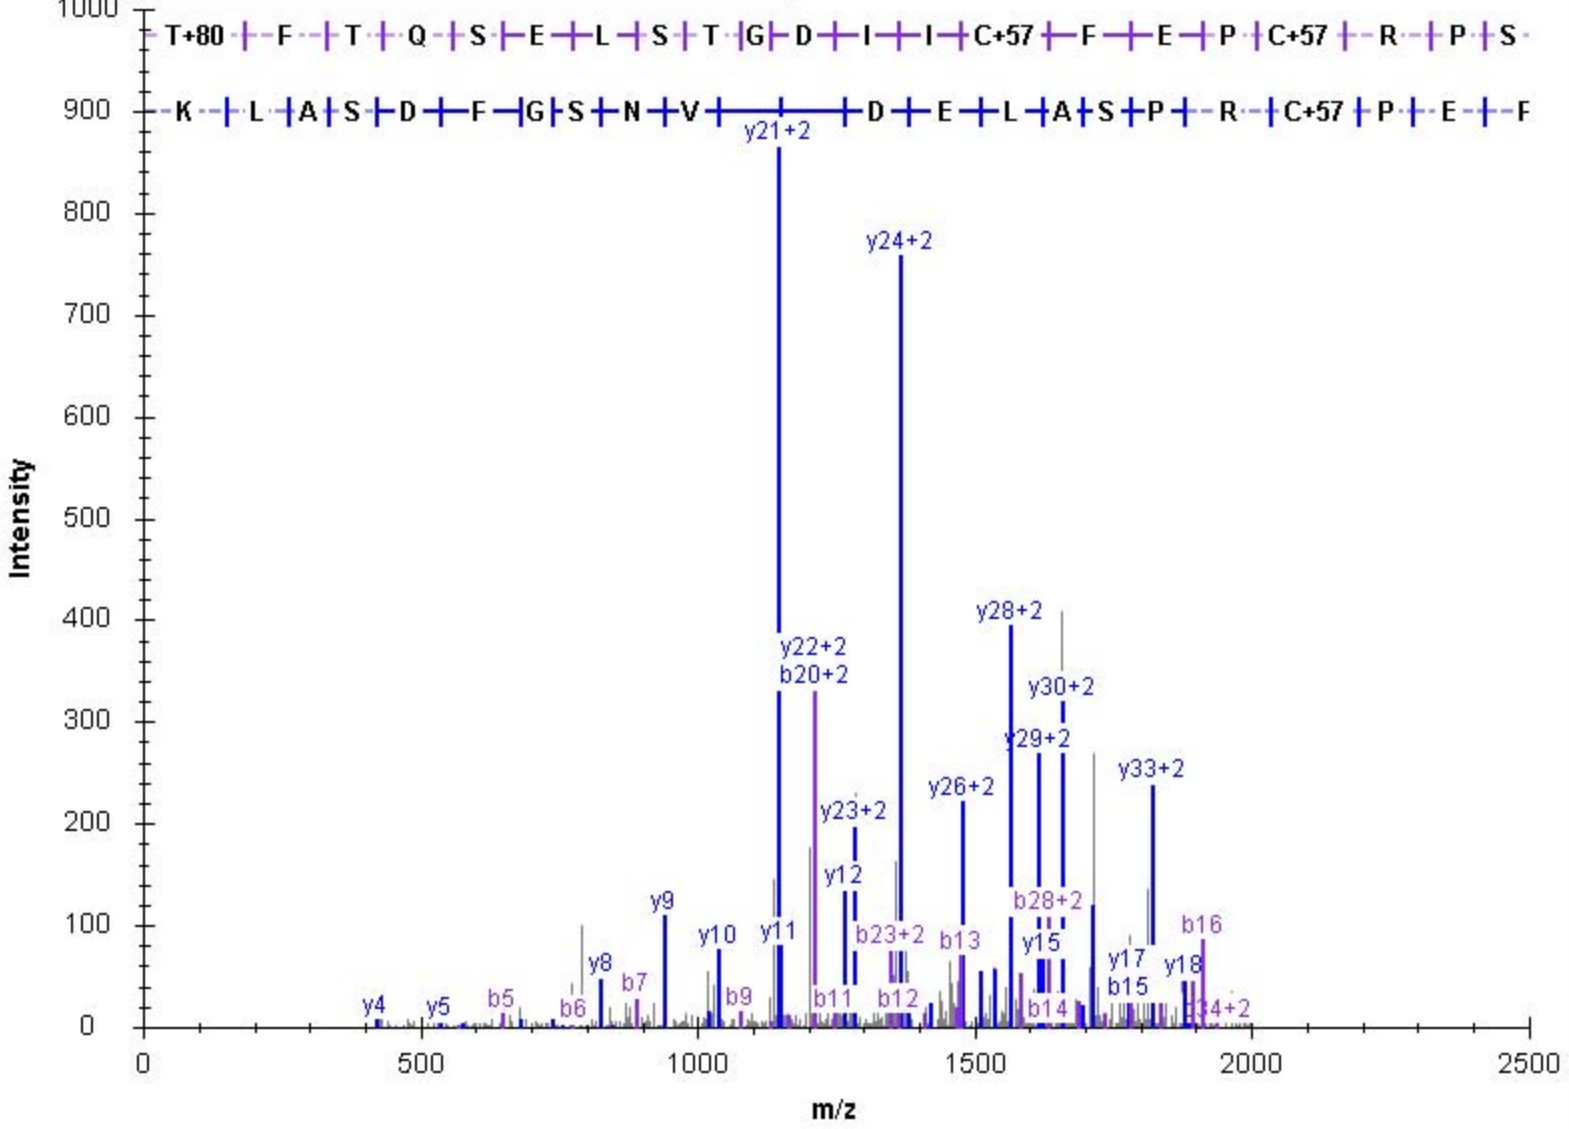

| b               | b(+2)           |    |   | y  | y(+2)           |                 |
|-----------------|-----------------|----|---|----|-----------------|-----------------|
| <b>115.050</b>  | 58.029          | 1  | N | 27 | 3219.470        | 1610.239        |
| 228.134         | 114.571         | 2  | L | 26 | 3105.427        | 1553.217        |
| <b>325.187</b>  | 163.097         | 3  | P | 25 | 2992.343        | <b>1496.675</b> |
| 453.282         | 227.145         | 4  | K | 24 | 2895.290        | <b>1448.149</b> |
| 582.325         | 291.666         | 5  | E | 23 | 2767.195        | <b>1384.101</b> |
| <b>696.368</b>  | 348.687         | 6  | N | 22 | 2638.153        | <b>1319.580</b> |
| <b>863.400</b>  | 432.203         | 7  | S | 21 | 2524.110        | <b>1262.559</b> |
| <b>992.442</b>  | 496.725         | 8  | E | 20 | 2357.078        | <b>1179.043</b> |
| <b>1105.526</b> | <b>553.267</b>  | 9  | L | 19 | 2228.035        | <b>1114.521</b> |
| <b>1220.553</b> | <b>610.780</b>  | 10 | D | 18 | 2114.951        | <b>1057.979</b> |
| <b>1333.637</b> | <b>667.322</b>  | 11 | L | 17 | <b>1999.924</b> | <b>1000.466</b> |
| <b>1420.669</b> | <b>710.838</b>  | 12 | S | 16 | <b>1886.840</b> | <b>943.924</b>  |
| <b>1534.712</b> | 767.860         | 13 | N | 15 | <b>1799.808</b> | <b>900.408</b>  |
| <b>1681.781</b> | <b>841.394</b>  | 14 | F | 14 | <b>1685.765</b> | <b>843.386</b>  |
| <b>1809.839</b> | <b>905.423</b>  | 15 | Q | 13 | <b>1538.697</b> | <b>769.852</b>  |
| 1924.866        | <b>962.937</b>  | 16 | D | 12 | <b>1410.638</b> | <b>705.823</b>  |
| 2039.893        | <b>1020.450</b> | 17 | D | 11 | <b>1295.611</b> | 648.309         |
| 2152.977        | 1076.992        | 18 | L | 10 | <b>1180.584</b> | <b>590.796</b>  |
| 2268.004        | <b>1134.506</b> | 19 | D | 9  | 1067.500        | 534.254         |
| 2415.072        | <b>1208.040</b> | 20 | F | 8  | <b>952.473</b>  | 476.740         |
| 2544.115        | <b>1272.561</b> | 21 | E | 7  | <b>805.405</b>  | 403.206         |
| 2658.158        | <b>1329.583</b> | 22 | N | 6  | <b>676.362</b>  | 338.685         |
| 2745.190        | <b>1373.099</b> | 23 | S | 5  | <b>562.320</b>  | 281.663         |
| 2858.274        | <b>1429.641</b> | 24 | I | 4  | <b>475.287</b>  | 238.147         |
| 2945.306        | <b>1473.157</b> | 25 | S | 3  | <b>362.203</b>  | 181.605         |
| 3073.365        | <b>1537.186</b> | 26 | Q | 2  | 275.171         | 138.089         |
| 3201.460        | 1601.233        | 27 | K | 1  | 147.113         | 74.060          |

controllerType=0 controllerNumber=1 scan=14082

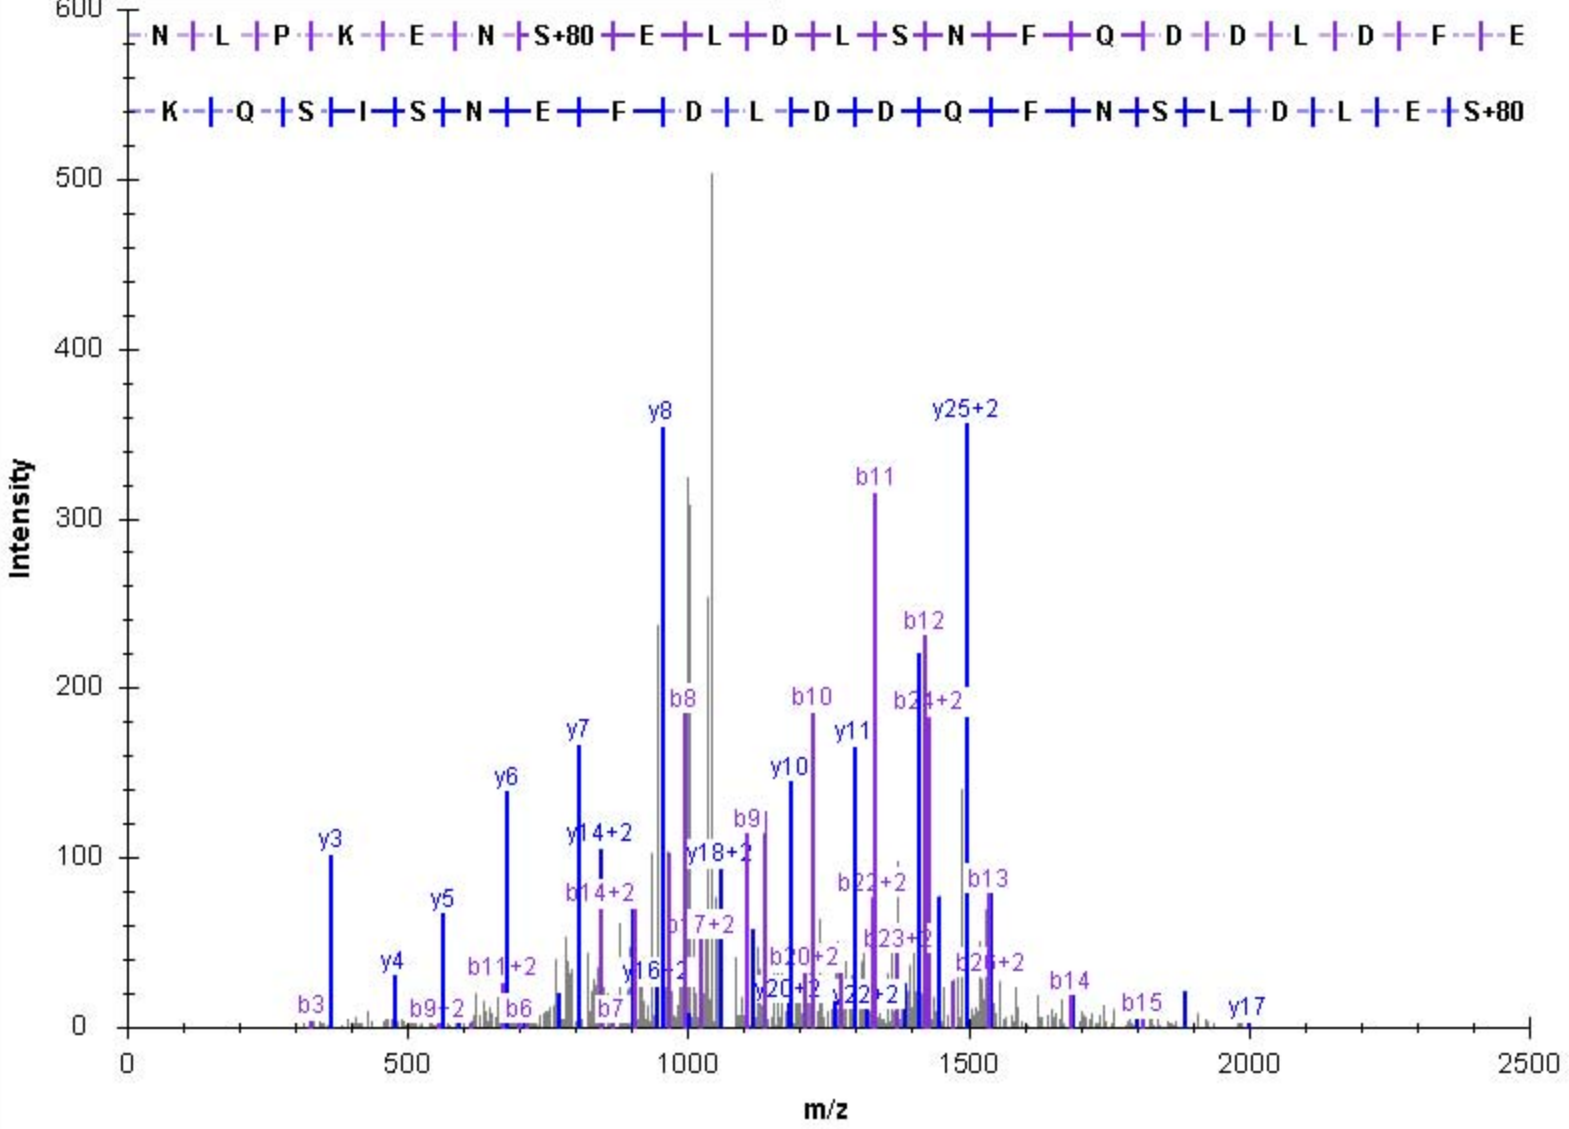

| b               | b(+2)           |    |   |    | y               | y(+2)           |
|-----------------|-----------------|----|---|----|-----------------|-----------------|
| <b>130.050</b>  | 65.529          | 1  | E | 23 | 2767.195        | 1384.101        |
| 244.093         | 122.550         | 2  | N | 22 | 2638.153        | <b>1319.580</b> |
| 411.125         | 206.066         | 3  | S | 21 | 2524.110        | <b>1262.559</b> |
| <b>540.167</b>  | 270.587         | 4  | E | 20 | 2357.078        | <b>1179.043</b> |
| 653.251         | 327.129         | 5  | L | 19 | 2228.035        | <b>1114.521</b> |
| <b>768.278</b>  | 384.643         | 6  | D | 18 | 2114.951        | <b>1057.979</b> |
| <b>881.362</b>  | 441.185         | 7  | L | 17 | <b>1999.924</b> | <b>1000.466</b> |
| <b>968.395</b>  | 484.701         | 8  | S | 16 | <b>1886.840</b> | 943.924         |
| <b>1082.437</b> | 541.722         | 9  | N | 15 | <b>1799.808</b> | <b>900.408</b>  |
| <b>1229.506</b> | 615.257         | 10 | F | 14 | <b>1685.765</b> | 843.386         |
| <b>1357.564</b> | 679.286         | 11 | Q | 13 | <b>1538.697</b> | 769.852         |
| <b>1472.591</b> | 736.799         | 12 | D | 12 | <b>1410.638</b> | <b>705.823</b>  |
| <b>1587.618</b> | 794.313         | 13 | D | 11 | <b>1295.611</b> | 648.309         |
| <b>1700.702</b> | 850.855         | 14 | L | 10 | <b>1180.584</b> | 590.796         |
| <b>1815.729</b> | 908.368         | 15 | D | 9  | <b>1067.500</b> | 534.254         |
| <b>1962.798</b> | 981.903         | 16 | F | 8  | <b>952.473</b>  | 476.740         |
| 2091.840        | <b>1046.424</b> | 17 | E | 7  | <b>805.405</b>  | 403.206         |
| 2205.883        | 1103.445        | 18 | N | 6  | <b>676.362</b>  | 338.685         |
| 2292.915        | <b>1146.961</b> | 19 | S | 5  | <b>562.320</b>  | 281.663         |
| 2405.999        | <b>1203.503</b> | 20 | I | 4  | <b>475.287</b>  | 238.147         |
| 2493.031        | 1247.019        | 21 | S | 3  | 362.203         | 181.605         |
| 2621.090        | <b>1311.049</b> | 22 | Q | 2  | 275.171         | 138.089         |
| 2749.185        | 1375.096        | 23 | K | 1  | 147.113         | 74.060          |

controllerType=0 controllerNumber=1 scan=12742

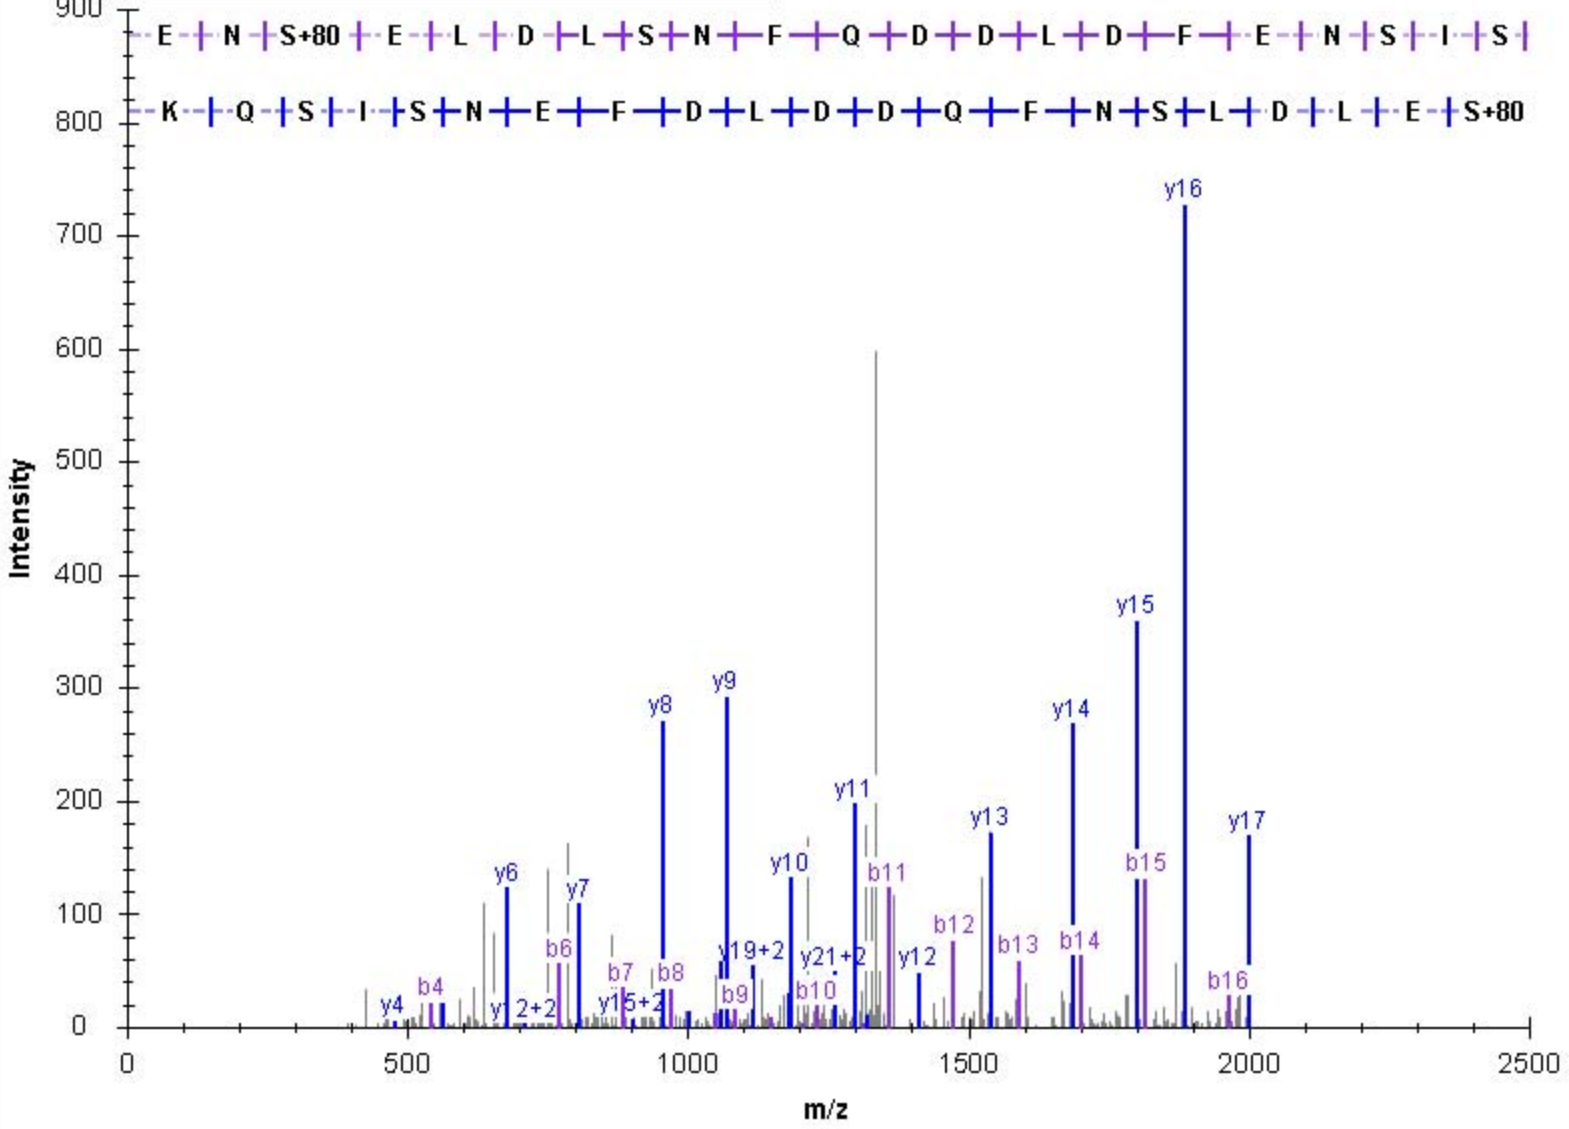

| b               | b(+2)           |    |   |    | y               | y(+2)           |
|-----------------|-----------------|----|---|----|-----------------|-----------------|
| <b>130.050</b>  | 65.529          | 1  | E | 29 | 3500.535        | 1750.771        |
| 244.093         | 122.550         | 2  | N | 28 | 3371.492        | 1686.250        |
| 331.125         | 166.066         | 3  | S | 27 | 3257.449        | 1629.228        |
| 460.167         | 230.587         | 4  | E | 26 | 3170.417        | 1585.712        |
| <b>573.251</b>  | 287.129         | 5  | L | 25 | 3041.375        | <b>1521.191</b> |
| <b>688.278</b>  | 344.643         | 6  | D | 24 | 2928.291        | <b>1464.649</b> |
| <b>801.362</b>  | 401.185         | 7  | L | 23 | 2813.264        | <b>1407.136</b> |
| <b>888.395</b>  | 444.701         | 8  | S | 22 | 2700.180        | <b>1350.594</b> |
| 1002.437        | 501.722         | 9  | N | 21 | 2613.148        | <b>1307.078</b> |
| <b>1149.506</b> | 575.257         | 10 | F | 20 | 2499.105        | <b>1250.056</b> |
| <b>1277.564</b> | 639.286         | 11 | Q | 19 | 2352.036        | <b>1176.522</b> |
| <b>1392.591</b> | 696.799         | 12 | D | 18 | 2223.978        | <b>1112.493</b> |
| <b>1507.618</b> | 754.313         | 13 | D | 17 | 2108.951        | <b>1054.979</b> |
| <b>1620.702</b> | 810.855         | 14 | L | 16 | 1993.924        | <b>997.466</b>  |
| <b>1735.729</b> | 868.368         | 15 | D | 15 | 1880.840        | <b>940.924</b>  |
| <b>1882.798</b> | <b>941.903</b>  | 16 | F | 14 | <b>1765.813</b> | <b>883.410</b>  |
| 2011.840        | <b>1006.424</b> | 17 | E | 13 | <b>1618.745</b> | <b>809.876</b>  |
| 2125.883        | 1063.445        | 18 | N | 12 | <b>1489.702</b> | <b>745.355</b>  |
| 2292.915        | <b>1146.961</b> | 19 | S | 11 | <b>1375.659</b> | <b>688.333</b>  |
| 2405.999        | 1203.503        | 20 | I | 10 | 1208.627        | <b>604.817</b>  |
| 2493.031        | 1247.019        | 21 | S | 9  | <b>1095.543</b> | <b>548.275</b>  |
| 2621.090        | 1311.049        | 22 | Q | 8  | 1008.511        | 504.759         |
| 2749.185        | <b>1375.096</b> | 23 | K | 7  | <b>880.452</b>  | 440.730         |
| 2863.228        | 1432.118        | 24 | N | 6  | <b>752.357</b>  | 376.682         |
| 2992.270        | 1496.639        | 25 | E | 5  | <b>638.314</b>  | 319.661         |
| 3139.339        | <b>1570.173</b> | 26 | F | 4  | <b>509.272</b>  | 255.140         |
| 3226.371        | 1613.689        | 27 | S | 3  | 362.203         | 181.605         |
| 3354.429        | 1677.718        | 28 | Q | 2  | 275.171         | 138.089         |
| 3482.524        | 1741.766        | 29 | K | 1  | 147.113         | 74.060          |

controllerType=0 controllerNumber=1 scan=14157

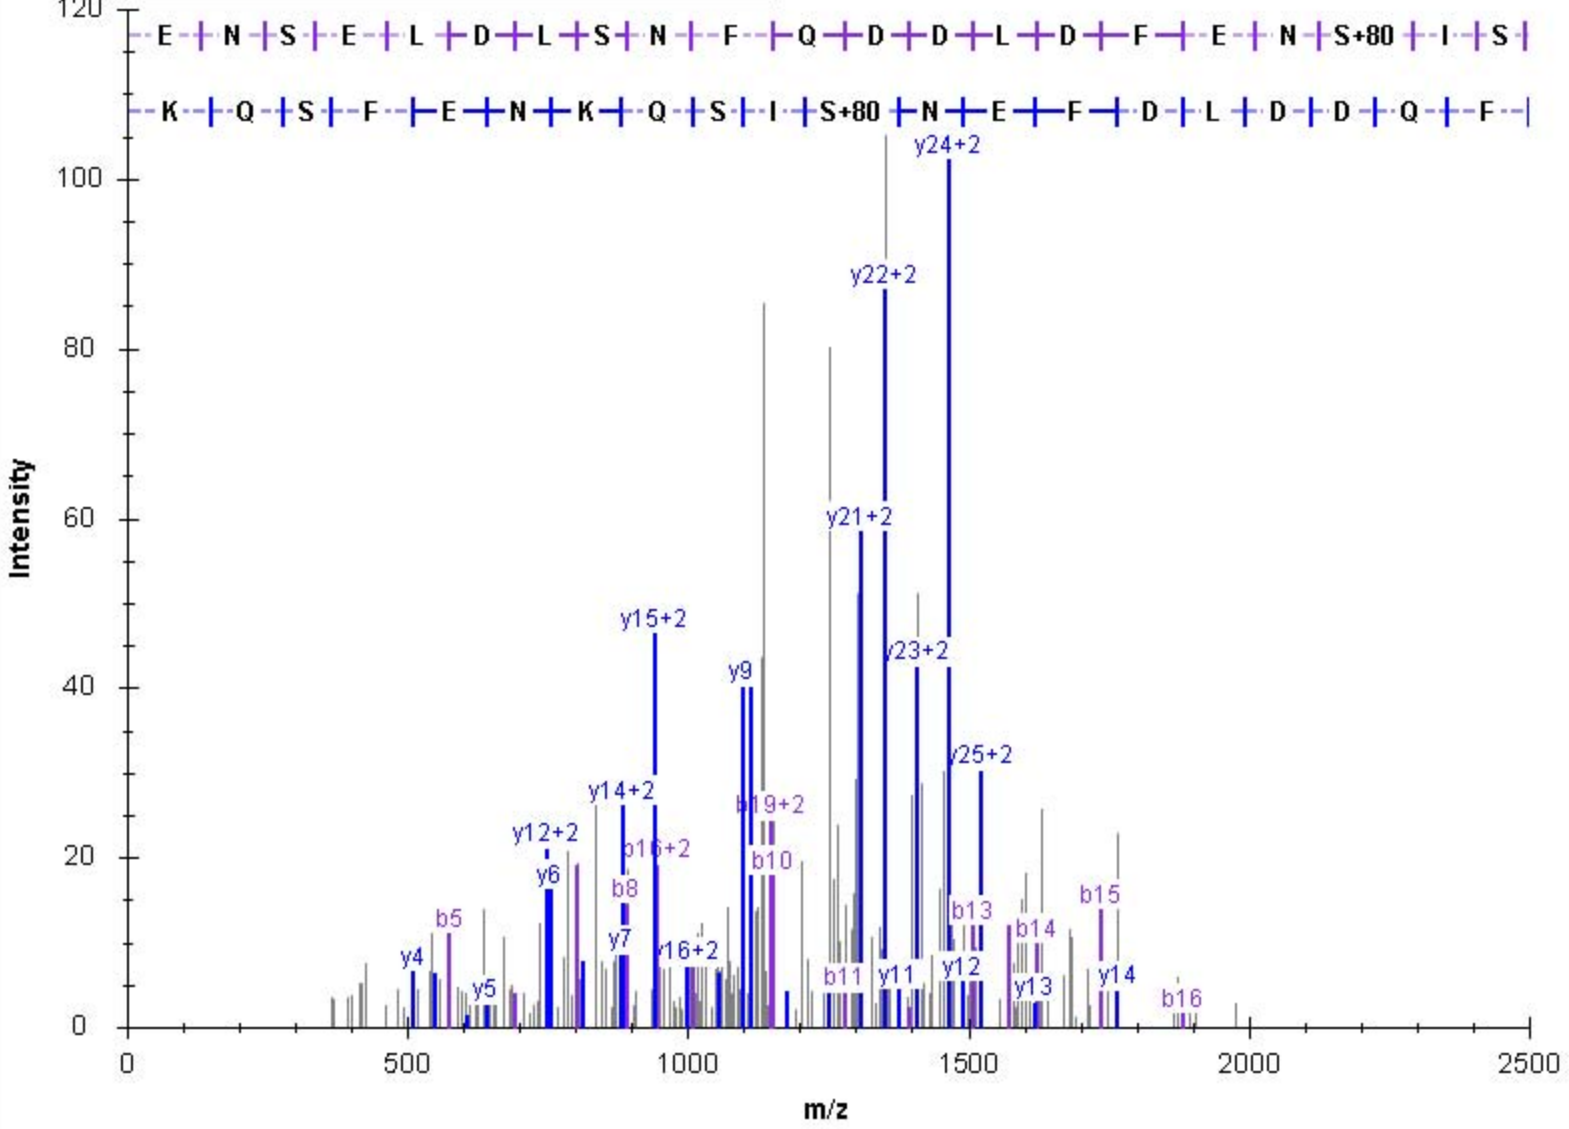



| b               | b(+2)           |    |   | y  | y(+2)           |                 |
|-----------------|-----------------|----|---|----|-----------------|-----------------|
| <b>88.039</b>   | 44.523          | 1  | S | 39 | 3786.855        | 1893.931        |
| 185.092         | 93.050          | 2  | P | 38 | 3699.823        | 1850.415        |
| 272.124         | 136.566         | 3  | S | 37 | 3602.770        | 1801.889        |
| <b>371.193</b>  | 186.100         | 4  | V | 36 | 3515.738        | 1758.372        |
| 468.245         | 234.626         | 5  | P | 35 | 3416.669        | <b>1708.838</b> |
| <b>581.329</b>  | 291.168         | 6  | L | 34 | 3319.617        | 1660.312        |
| <b>748.361</b>  | 374.684         | 7  | S | 33 | 3206.532        | <b>1603.770</b> |
| 845.414         | 423.211         | 8  | P | 32 | 3039.500        | <b>1520.254</b> |
| <b>944.483</b>  | 472.745         | 9  | V | 31 | 2942.448        | 1471.727        |
| <b>1031.515</b> | 516.261         | 10 | S | 30 | 2843.379        | 1422.193        |
| 1132.562        | 566.785         | 11 | T | 29 | 2756.347        | <b>1378.677</b> |
| <b>1279.631</b> | 640.319         | 12 | F | 28 | 2655.300        | 1328.153        |
| 1376.683        | 688.845         | 13 | P | 27 | 2508.231        | 1254.619        |
| <b>1447.721</b> | 724.364         | 14 | A | 26 | 2411.178        | <b>1206.093</b> |
| <b>1534.753</b> | 767.880         | 15 | S | 25 | 2340.141        | 1170.574        |
| 1621.785        | 811.396         | 16 | S | 24 | 2253.109        | 1127.058        |
| <b>1734.869</b> | <b>867.938</b>  | 17 | I | 23 | 2166.077        | 1083.542        |
| <b>1821.901</b> | 911.454         | 18 | S | 22 | 2052.993        | 1027.000        |
| <b>1934.985</b> | 967.996         | 19 | L | 21 | 1965.961        | <b>983.484</b>  |
| 2050.012        | 1025.509        | 20 | D | 20 | <b>1852.877</b> | 926.942         |
| 2121.049        | 1061.028        | 21 | A | 19 | <b>1737.850</b> | 869.429         |
| 2208.081        | 1104.544        | 22 | S | 18 | 1666.813        | 833.910         |
| 2295.113        | 1148.060        | 23 | S | 17 | <b>1579.781</b> | 790.394         |
| 2410.140        | 1205.574        | 24 | D | 16 | 1492.749        | 746.878         |
| 2509.208        | 1255.108        | 25 | V | 15 | 1377.722        | 689.365         |
| 2596.240        | 1298.624        | 26 | S | 14 | <b>1278.654</b> | 639.830         |
| 2667.277        | 1334.142        | 27 | A | 13 | 1191.622        | 596.314         |
| 2738.314        | 1369.661        | 28 | A | 12 | <b>1120.584</b> | 560.796         |
| 2853.341        | 1427.174        | 29 | D | 11 | <b>1049.547</b> | <b>525.277</b>  |
| 2952.410        | <b>1476.709</b> | 30 | V | 10 | <b>934.520</b>  | 467.764         |
| 3039.442        | <b>1520.225</b> | 31 | S | 9  | <b>835.452</b>  | 418.230         |
| 3138.510        | <b>1569.759</b> | 32 | V | 8  | <b>748.420</b>  | 374.714         |

controllerType=0 controllerNumber=1 scan=13460

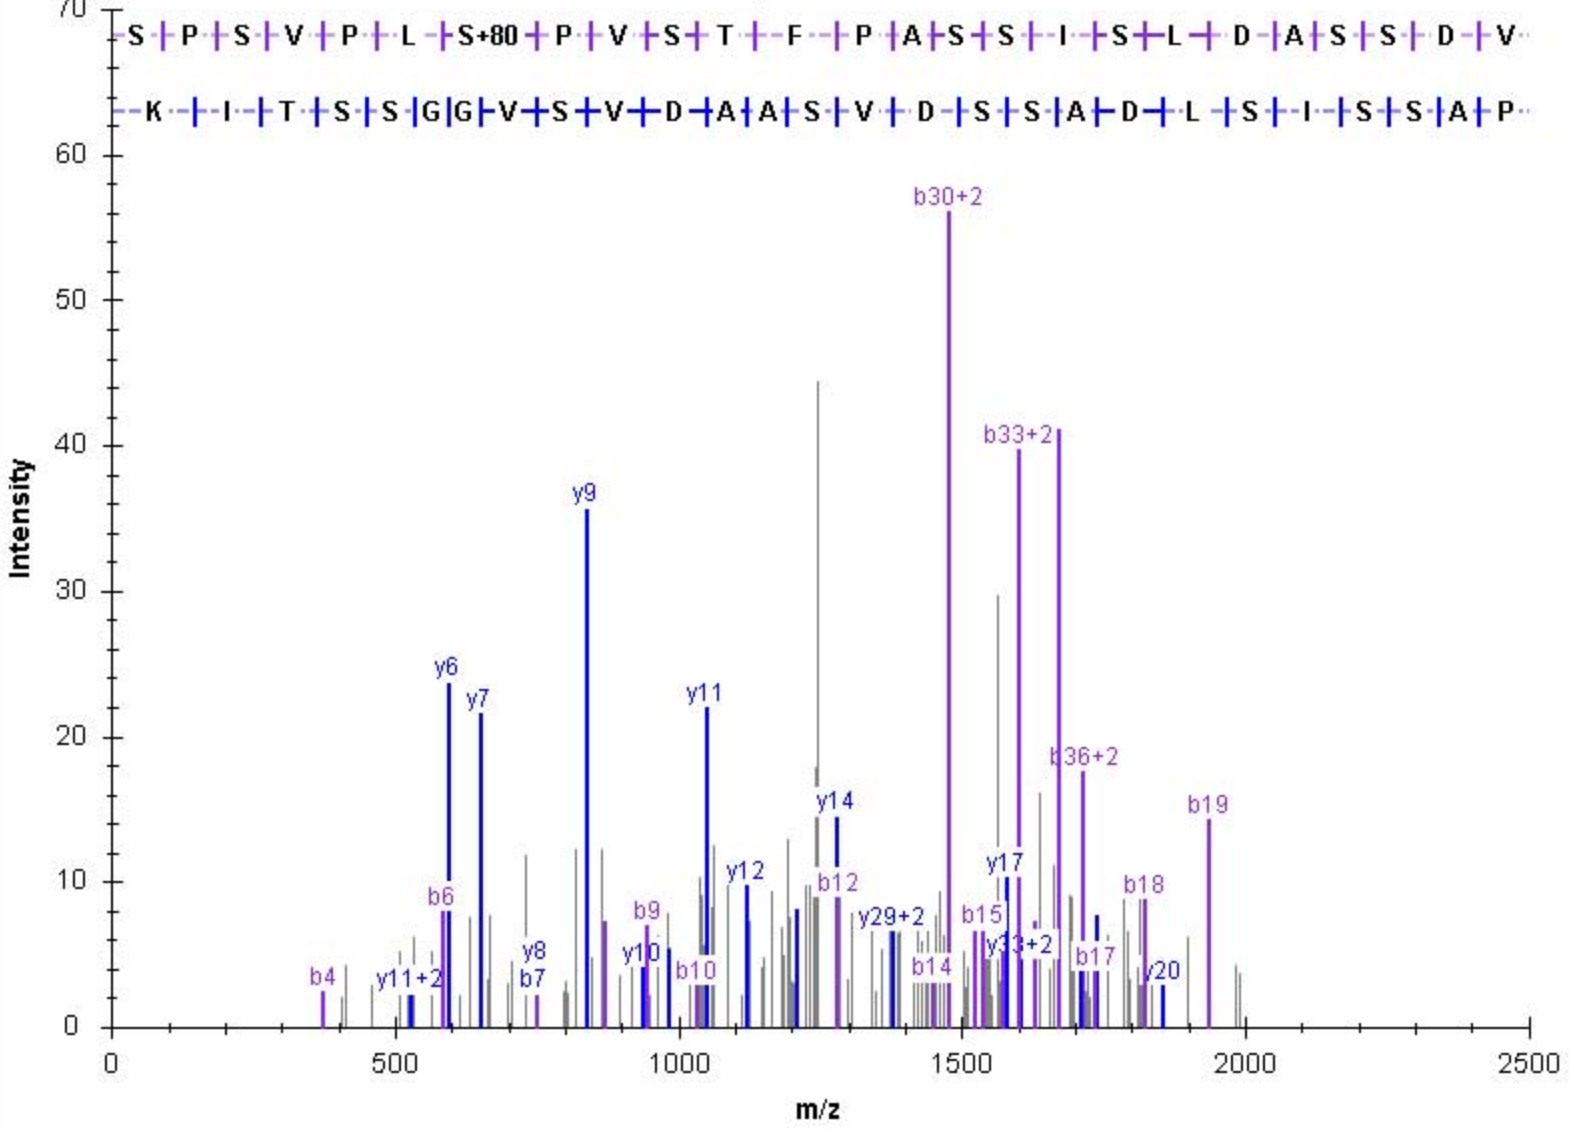

| b               | b(+2)          |    |   |    | y               | y(+2)          |
|-----------------|----------------|----|---|----|-----------------|----------------|
| 114.091         | 57.549         | 1  | L | 14 | 1625.802        | 813.405        |
| 228.134         | 114.571        | 2  | N | 13 | 1512.718        | <b>756.863</b> |
| <b>341.218</b>  | 171.113        | 3  | L | 12 | <b>1398.675</b> | <b>699.841</b> |
| <b>508.250</b>  | 254.629        | 4  | S | 11 | <b>1285.591</b> | <b>643.299</b> |
| 605.303         | <b>303.155</b> | 5  | P | 10 | <b>1118.559</b> | <b>559.783</b> |
| <b>662.325</b>  | 331.666        | 6  | G | 9  | <b>1021.506</b> | <b>511.257</b> |
| <b>733.362</b>  | <b>367.184</b> | 7  | A | 8  | <b>964.485</b>  | <b>482.746</b> |
| <b>804.399</b>  | <b>402.703</b> | 8  | A | 7  | <b>893.448</b>  | <b>447.227</b> |
| <b>917.483</b>  | <b>459.245</b> | 9  | I | 6  | <b>822.410</b>  | <b>411.709</b> |
| <b>1046.525</b> | <b>523.766</b> | 10 | E | 5  | <b>709.326</b>  | 355.167        |
| <b>1160.568</b> | <b>580.788</b> | 11 | N | 4  | <b>580.284</b>  | 290.646        |
| <b>1288.627</b> | <b>644.817</b> | 12 | Q | 3  | <b>466.241</b>  | 233.624        |
| <b>1451.690</b> | <b>726.349</b> | 13 | Y | 2  | <b>338.182</b>  | 169.595        |
| 1607.791        | <b>804.399</b> | 14 | R | 1  | 175.119         | 88.063         |

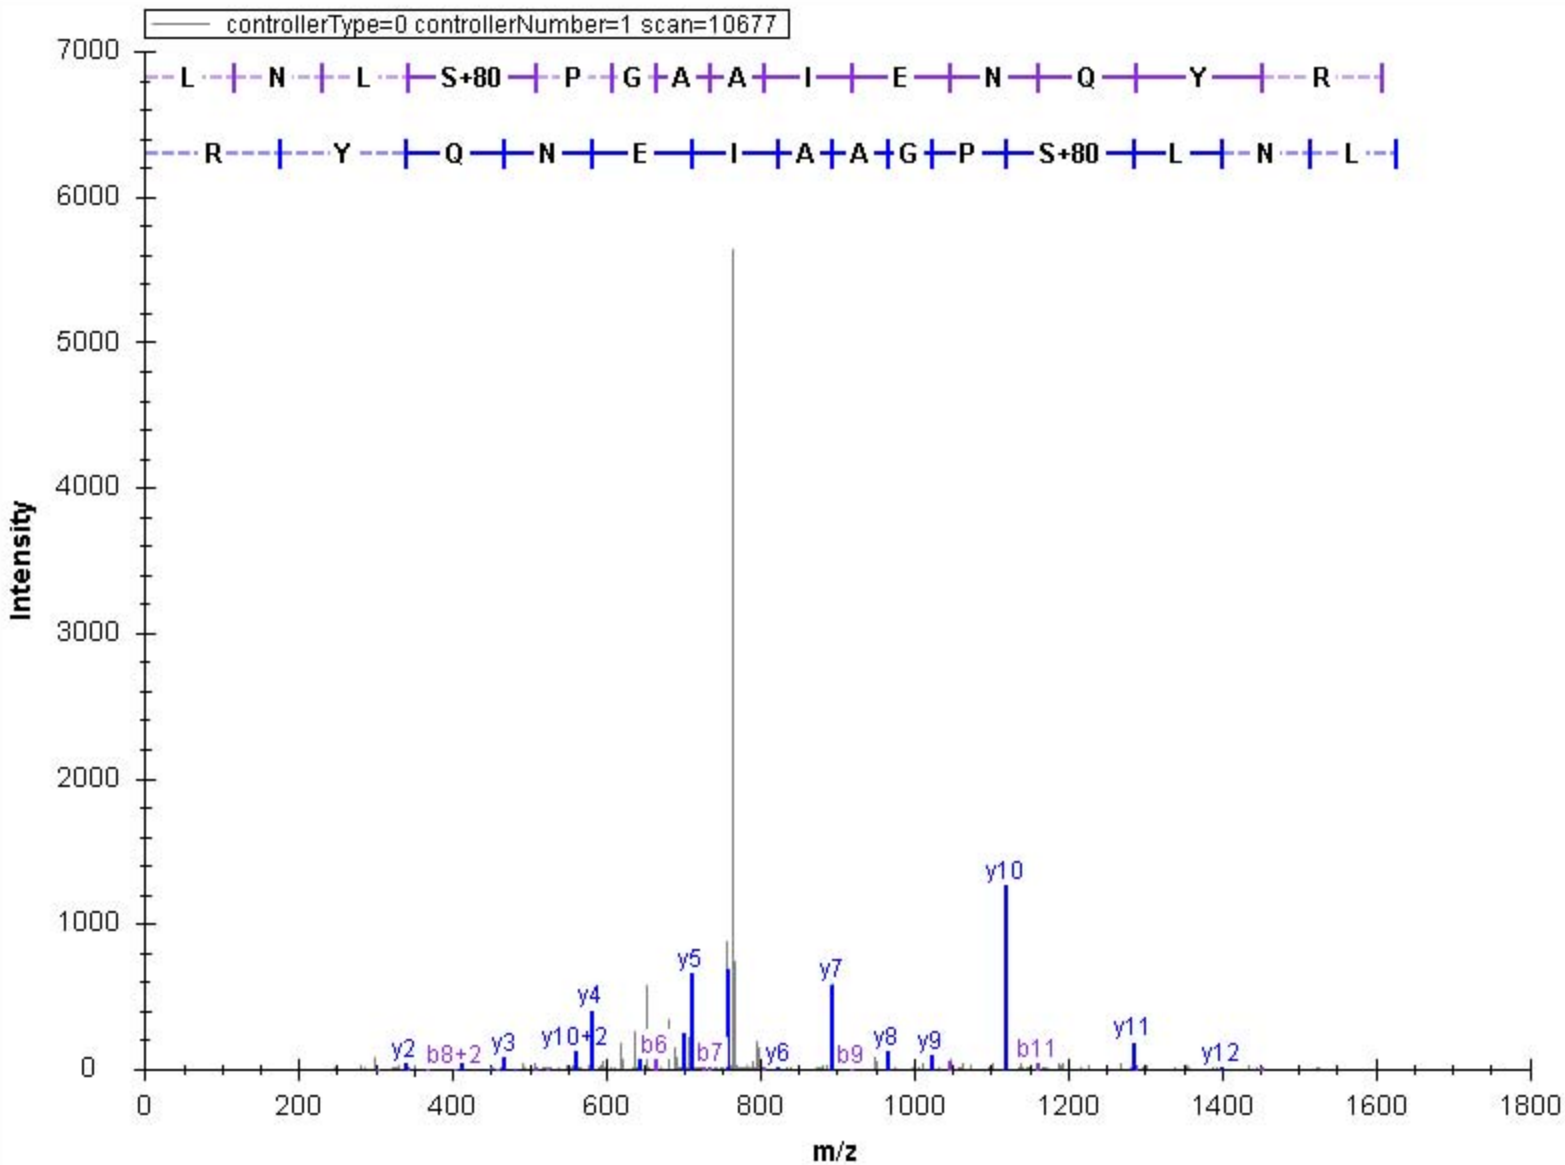

| b               | b(+2)          |    |   |    | y               | y(+2)          |
|-----------------|----------------|----|---|----|-----------------|----------------|
| <b>88.039</b>   | 44.523         | 1  | S | 18 | 1974.903        | 987.955        |
| 216.098         | 108.553        | 2  | Q | 17 | 1887.871        | <b>944.439</b> |
| 313.151         | 157.079        | 3  | P | 16 | <b>1759.812</b> | <b>880.410</b> |
| <b>426.235</b>  | 213.621        | 4  | L | 15 | <b>1662.760</b> | <b>831.883</b> |
| <b>525.303</b>  | 263.155        | 5  | V | 14 | <b>1549.675</b> | 775.341        |
| <b>596.340</b>  | <b>298.674</b> | 6  | A | 13 | <b>1450.607</b> | 725.807        |
| <b>709.424</b>  | 355.216        | 7  | L | 12 | <b>1379.570</b> | 690.289        |
| <b>823.467</b>  | 412.237        | 8  | N | 11 | <b>1266.486</b> | 633.747        |
| <b>910.499</b>  | 455.753        | 9  | S | 10 | <b>1152.443</b> | <b>576.725</b> |
| <b>1039.542</b> | 520.275        | 10 | E | 9  | 1065.411        | 533.209        |
| <b>1096.563</b> | 548.785        | 11 | G | 8  | <b>936.368</b>  | 468.688        |
| <b>1183.595</b> | 592.301        | 12 | S | 7  | <b>879.347</b>  | <b>440.177</b> |
| <b>1350.627</b> | 675.817        | 13 | S | 6  | <b>792.315</b>  | 396.661        |
| <b>1465.654</b> | 733.331        | 14 | D | 5  | <b>625.283</b>  | 313.145        |
| <b>1612.723</b> | <b>806.865</b> | 15 | F | 4  | <b>510.256</b>  | 255.632        |
| <b>1741.765</b> | <b>871.386</b> | 16 | E | 3  | <b>363.187</b>  | 182.097        |
| <b>1828.797</b> | <b>914.902</b> | 17 | S | 2  | 234.145         | 117.576        |
| 1956.892        | <b>978.950</b> | 18 | K | 1  | 147.113         | 74.060         |

controllerType=0 controllerNumber=1 scan=10334

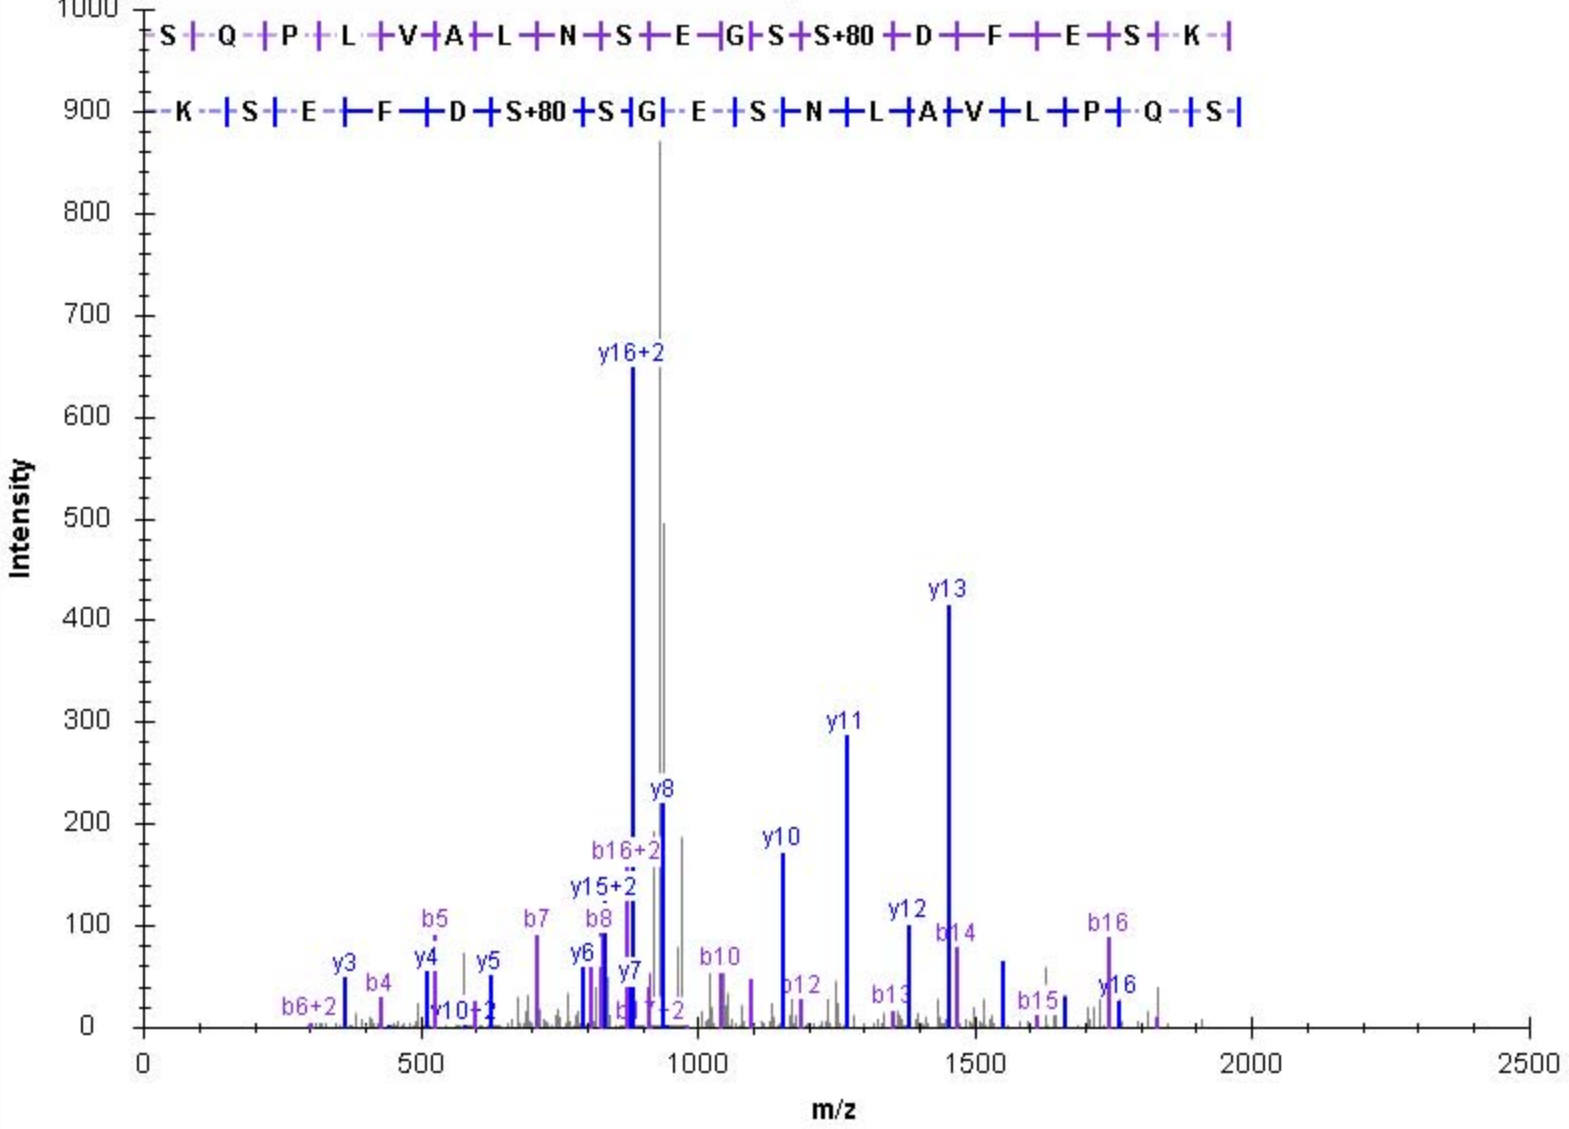

| b               | b(+2)    |    |   |    | y               | y(+2)          |
|-----------------|----------|----|---|----|-----------------|----------------|
| <b>88.039</b>   | 44.523   | 1  | S | 18 | 2054.903        | 1027.955       |
| 216.098         | 108.553  | 2  | Q | 17 | 1967.871        | 984.439        |
| 313.151         | 157.079  | 3  | P | 16 | <b>1839.812</b> | <b>920.410</b> |
| <b>426.235</b>  | 213.621  | 4  | L | 15 | <b>1742.760</b> | <b>871.883</b> |
| <b>525.303</b>  | 263.155  | 5  | V | 14 | <b>1629.675</b> | 815.341        |
| <b>596.340</b>  | 298.674  | 6  | A | 13 | <b>1530.607</b> | 765.807        |
| <b>709.424</b>  | 355.216  | 7  | L | 12 | <b>1459.570</b> | 730.289        |
| <b>823.467</b>  | 412.237  | 8  | N | 11 | <b>1346.486</b> | 673.747        |
| <b>990.499</b>  | 495.753  | 9  | S | 10 | <b>1232.443</b> | 616.725        |
| <b>1119.542</b> | 560.275  | 10 | E | 9  | <b>1065.411</b> | 533.209        |
| <b>1176.563</b> | 588.785  | 11 | G | 8  | <b>936.368</b>  | 468.688        |
| <b>1343.595</b> | 672.301  | 12 | S | 7  | <b>879.347</b>  | 440.177        |
| 1430.627        | 715.817  | 13 | S | 6  | <b>712.315</b>  | 356.661        |
| <b>1545.654</b> | 773.331  | 14 | D | 5  | <b>625.283</b>  | 313.145        |
| 1692.723        | 846.865  | 15 | F | 4  | <b>510.256</b>  | 255.632        |
| <b>1821.765</b> | 911.386  | 16 | E | 3  | <b>363.187</b>  | 182.097        |
| 1908.797        | 954.902  | 17 | S | 2  | 234.145         | 117.576        |
| 2036.892        | 1018.950 | 18 | K | 1  | 147.113         | 74.060         |

controllerType=0 controllerNumber=1 scan=11213

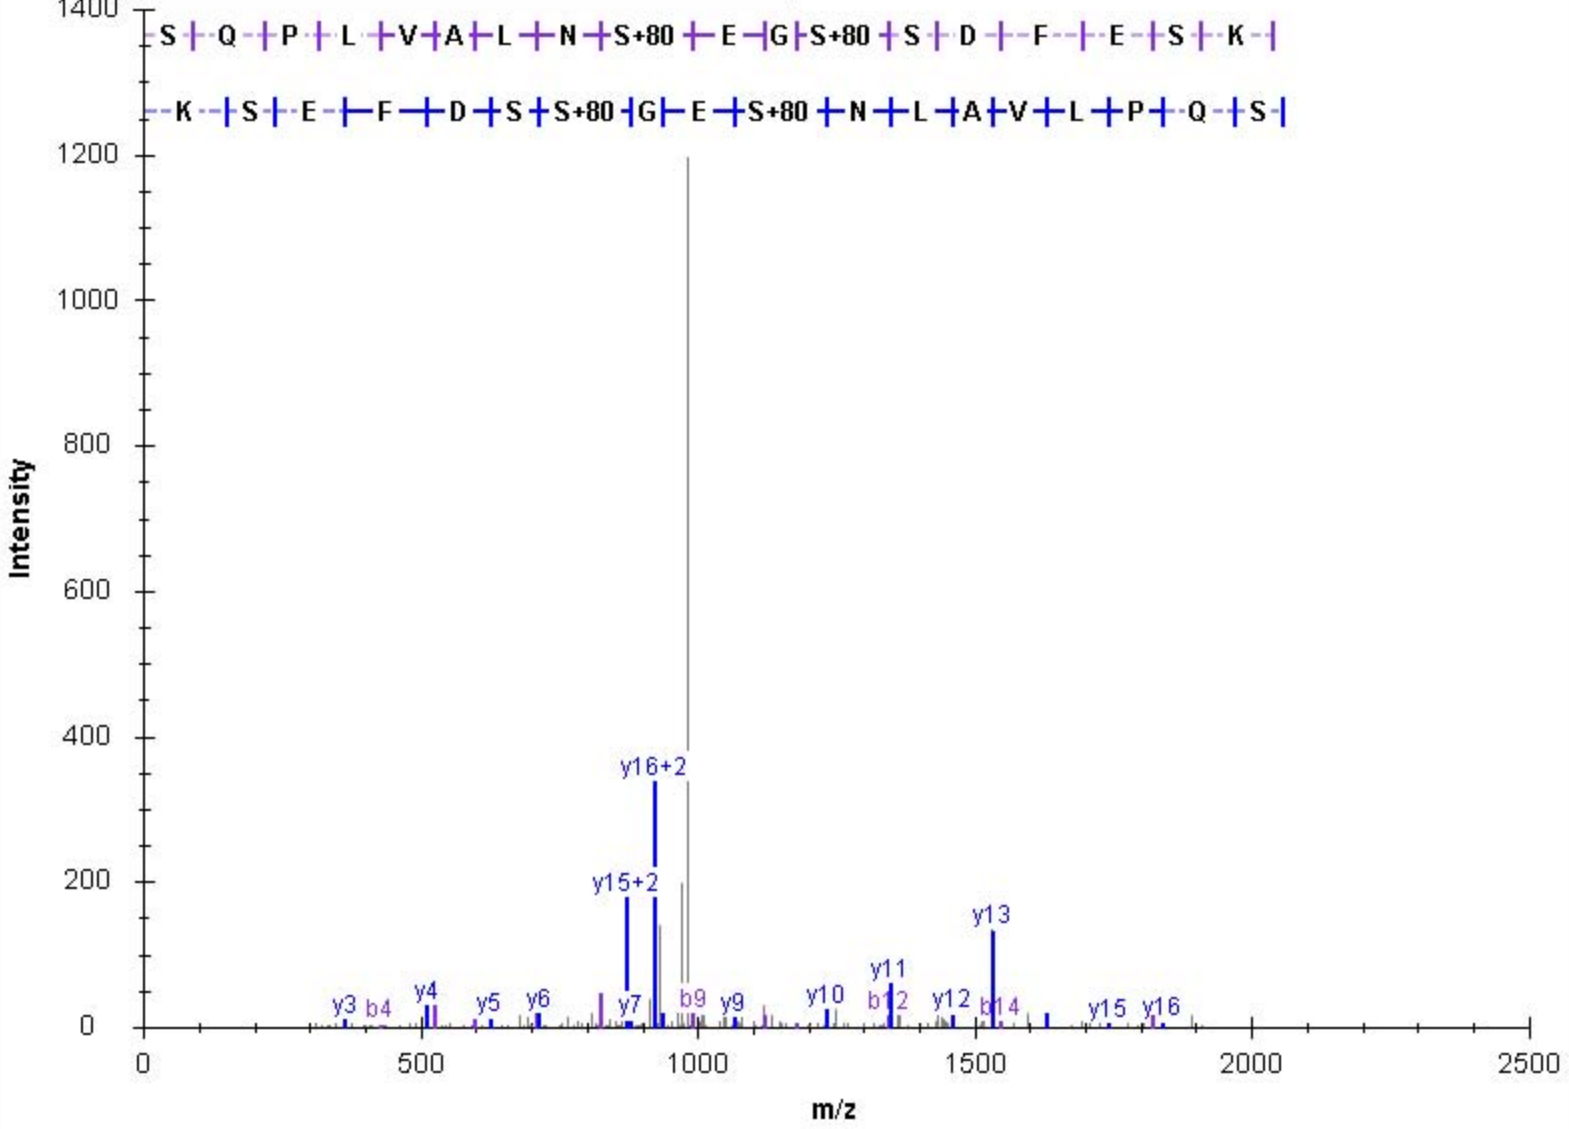



| b               | b(+2)          |    |   |    | y               | y(+2)          |
|-----------------|----------------|----|---|----|-----------------|----------------|
| <b>88.039</b>   | 44.523         | 1  | S | 18 | 2019.888        | 1010.448       |
| 175.071         | 88.039         | 2  | S | 17 | 1932.856        | 966.932        |
| 290.098         | 145.553        | 3  | D | 16 | 1845.824        | <b>923.416</b> |
| <b>404.141</b>  | 202.574        | 4  | N | 15 | 1730.797        | <b>865.902</b> |
| <b>505.189</b>  | 253.098        | 5  | T | 14 | <b>1616.754</b> | 808.881        |
| <b>672.221</b>  | 336.614        | 6  | S | 13 | <b>1515.706</b> | <b>758.357</b> |
| <b>785.305</b>  | 393.156        | 7  | L | 12 | <b>1348.674</b> | 674.841        |
| <b>900.332</b>  | 450.670        | 8  | D | 11 | <b>1235.590</b> | 618.299        |
| 957.353         | 479.180        | 9  | G | 10 | <b>1120.563</b> | 560.785        |
| <b>1058.401</b> | 529.704        | 10 | T | 9  | <b>1063.542</b> | 532.275        |
| 1155.454        | <b>578.231</b> | 11 | P | 8  | <b>962.494</b>  | 481.751        |
| <b>1268.538</b> | 634.773        | 12 | L | 7  | <b>865.441</b>  | 433.224        |
| <b>1396.596</b> | 698.802        | 13 | Q | 6  | <b>752.357</b>  | 376.682        |
| <b>1510.639</b> | 755.823        | 14 | N | 5  | <b>624.299</b>  | 312.653        |
| <b>1611.687</b> | <b>806.347</b> | 15 | T | 4  | <b>510.256</b>  | 255.632        |
| <b>1726.714</b> | <b>863.861</b> | 16 | D | 3  | <b>409.208</b>  | 205.108        |
| <b>1873.782</b> | 937.395        | 17 | F | 2  | <b>294.181</b>  | 147.594        |
| 2001.877        | 1001.442       | 18 | K | 1  | 147.113         | 74.060         |

controllerType=0 controllerNumber=1 scan=10086

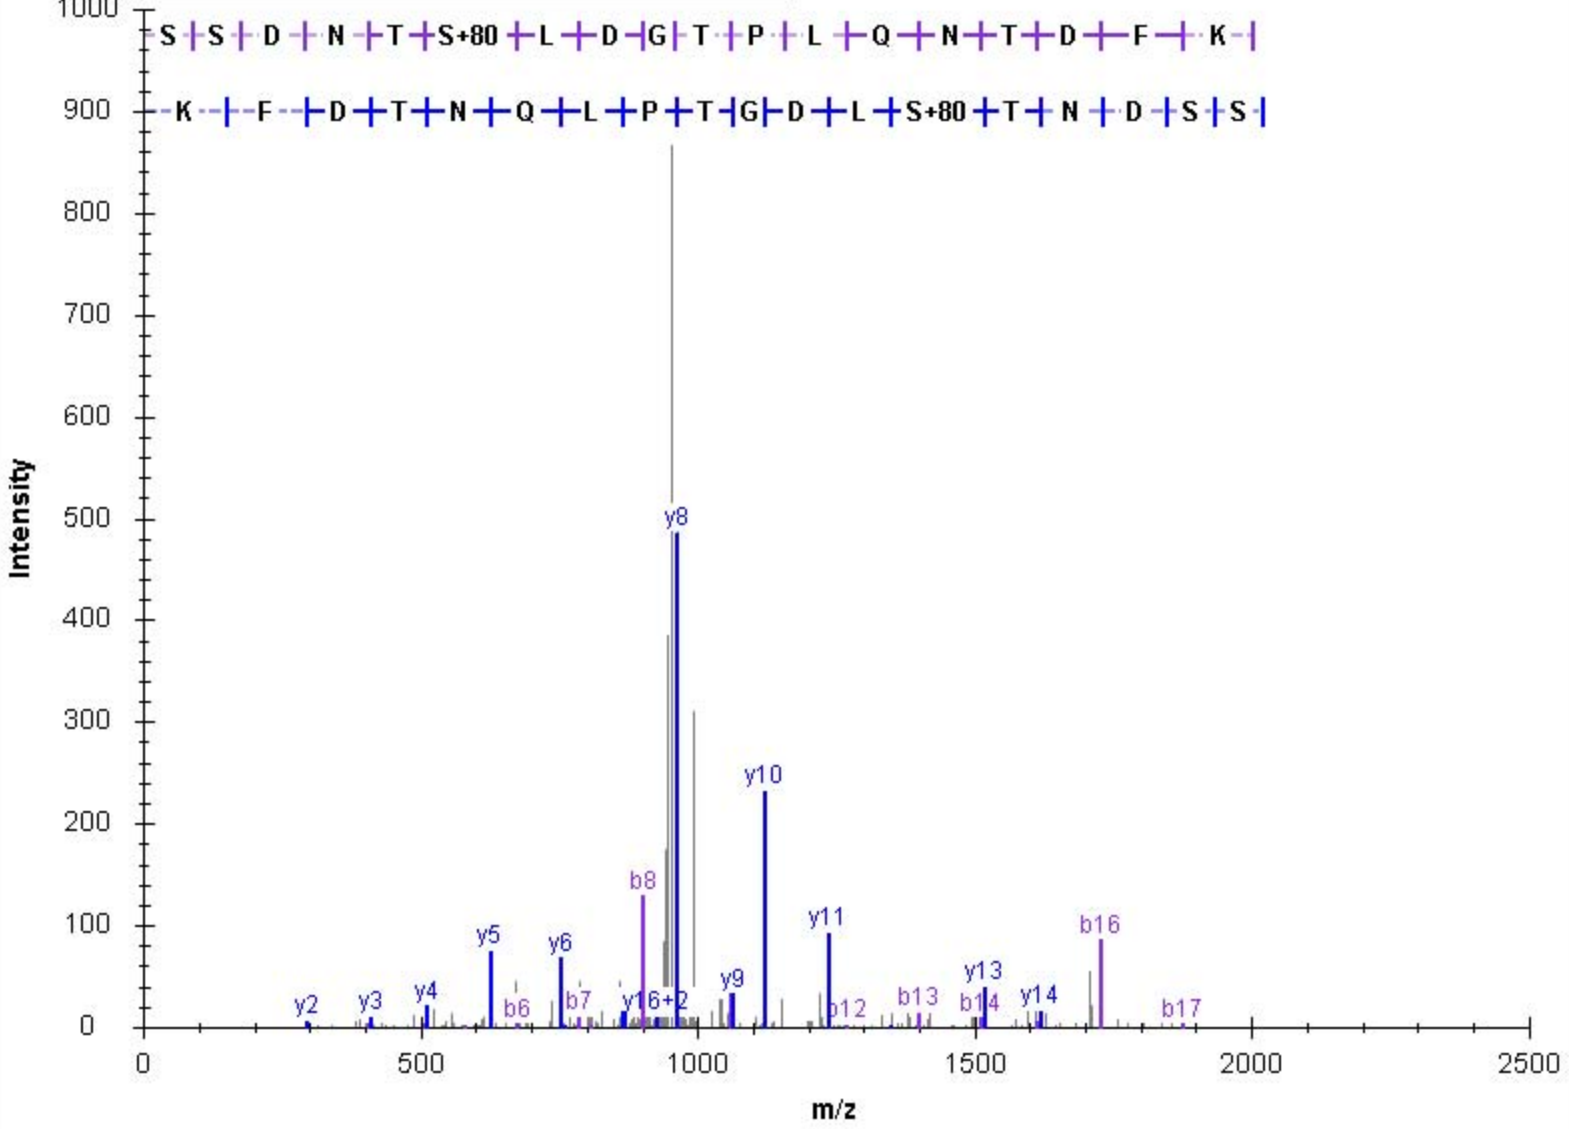

| b               | b(+2)           |    |   | y  | y(+2)           |                 |
|-----------------|-----------------|----|---|----|-----------------|-----------------|
| <b>88.039</b>   | 44.523          | 1  | S | 19 | 2147.983        | <b>1074.495</b> |
| 175.071         | 88.039          | 2  | S | 18 | 2060.951        | <b>1030.979</b> |
| <b>290.098</b>  | 145.553         | 3  | D | 17 | 1973.919        | <b>987.463</b>  |
| <b>404.141</b>  | 202.574         | 4  | N | 16 | 1858.892        | <b>929.950</b>  |
| <b>505.189</b>  | 253.098         | 5  | T | 15 | 1744.849        | <b>872.928</b>  |
| <b>672.221</b>  | 336.614         | 6  | S | 14 | 1643.801        | <b>822.404</b>  |
| <b>785.305</b>  | 393.156         | 7  | L | 13 | 1476.769        | <b>738.888</b>  |
| <b>900.332</b>  | 450.670         | 8  | D | 12 | <b>1363.685</b> | <b>682.346</b>  |
| 957.353         | 479.180         | 9  | G | 11 | <b>1248.658</b> | <b>624.833</b>  |
| <b>1058.401</b> | 529.704         | 10 | T | 10 | <b>1191.637</b> | <b>596.322</b>  |
| <b>1155.454</b> | <b>578.231</b>  | 11 | P | 9  | <b>1090.589</b> | <b>545.798</b>  |
| <b>1268.538</b> | 634.773         | 12 | L | 8  | <b>993.536</b>  | <b>497.272</b>  |
| <b>1396.596</b> | <b>698.802</b>  | 13 | Q | 7  | <b>880.452</b>  | <b>440.730</b>  |
| <b>1510.639</b> | <b>755.823</b>  | 14 | N | 6  | <b>752.394</b>  | <b>376.701</b>  |
| 1611.687        | <b>806.347</b>  | 15 | T | 5  | <b>638.351</b>  | 319.679         |
| 1726.714        | <b>863.861</b>  | 16 | D | 4  | <b>537.303</b>  | <b>269.155</b>  |
| 1873.782        | <b>937.395</b>  | 17 | F | 3  | <b>422.276</b>  | <b>211.642</b>  |
| 2001.877        | <b>1001.442</b> | 18 | K | 2  | <b>275.208</b>  | 138.108         |
| 2129.972        | 1065.490        | 19 | K | 1  | 147.113         | 74.060          |

controllerType=0 controllerNumber=1 scan=9489

Intensity (10<sup>3</sup>)

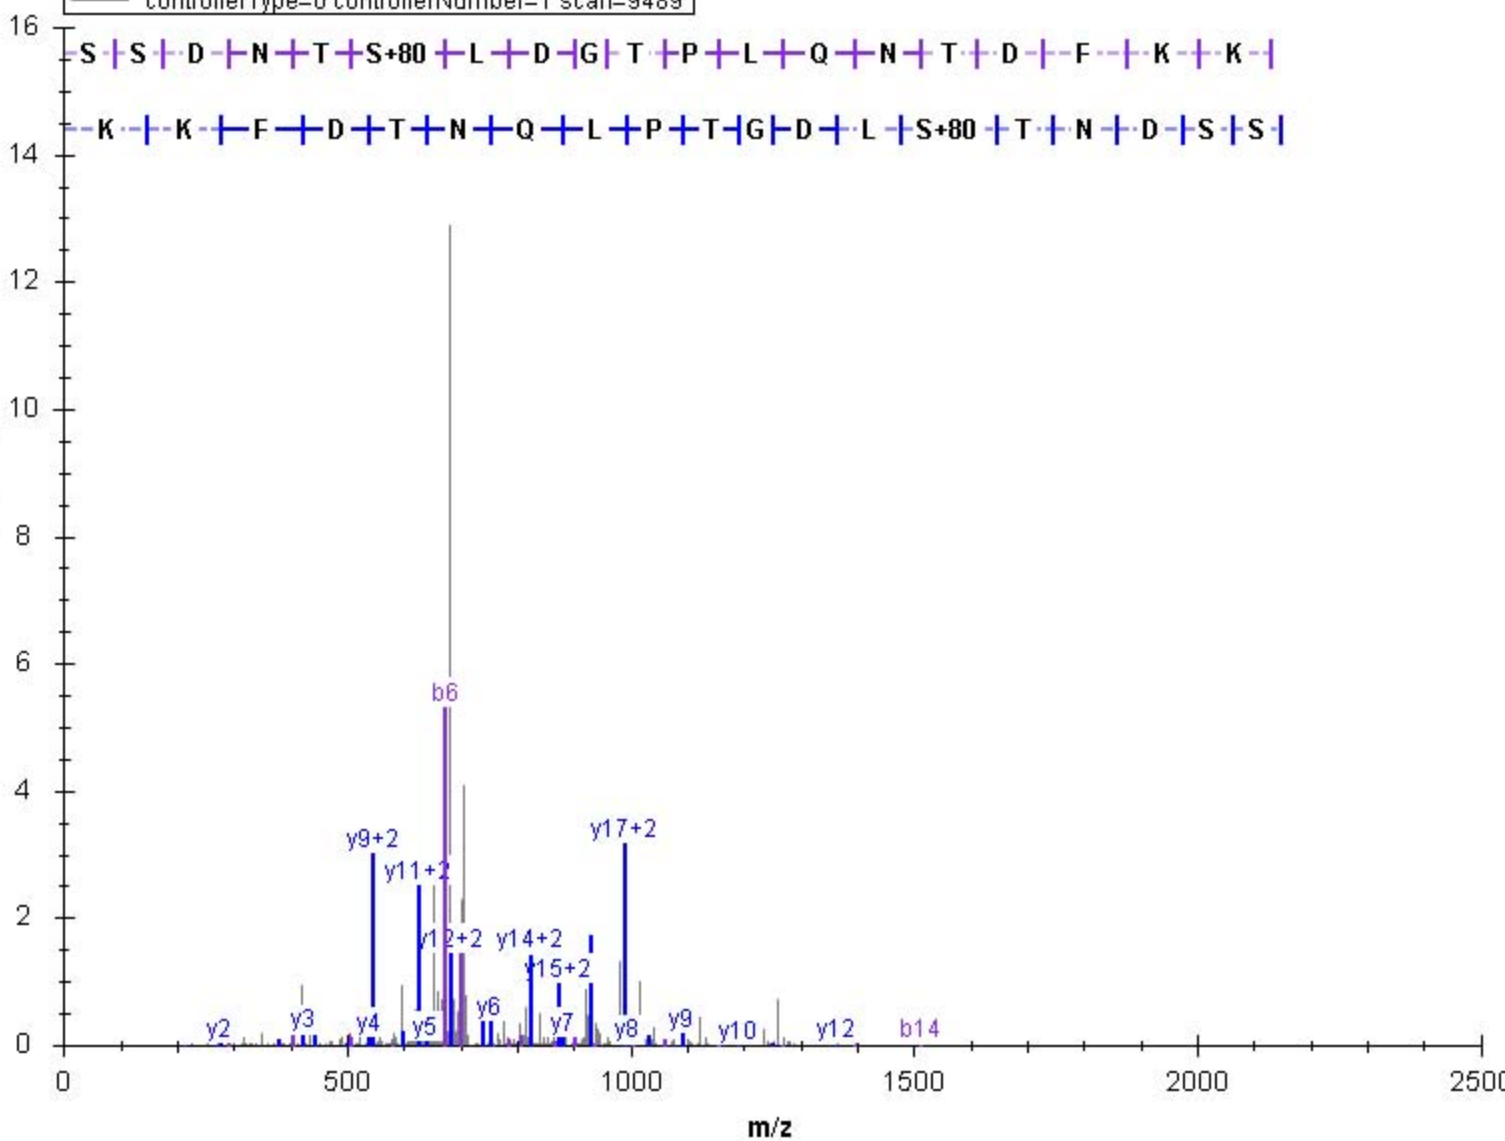

| b               | b(+2)          |    |   |    | y               | y(+2)          |
|-----------------|----------------|----|---|----|-----------------|----------------|
| 129.102         | 65.055         | 1  | K | 16 | 1887.860        | 944.433        |
| 228.171         | 114.589        | 2  | V | 15 | 1759.765        | <b>880.386</b> |
| <b>299.208</b>  | 150.108        | 3  | A | 14 | <b>1660.696</b> | 830.852        |
| <b>480.255</b>  | 240.631        | 4  | T | 13 | <b>1589.659</b> | 795.333        |
| <b>579.324</b>  | 290.166        | 5  | V | 12 | <b>1408.611</b> | 704.809        |
| <b>708.366</b>  | <b>354.687</b> | 6  | E | 11 | <b>1309.543</b> | <b>655.275</b> |
| <b>823.393</b>  | <b>412.200</b> | 7  | D | 10 | <b>1180.500</b> | 590.754        |
| 938.420         | <b>469.714</b> | 8  | D | 9  | <b>1065.473</b> | 533.240        |
| <b>1025.452</b> | 513.230        | 9  | S | 8  | <b>950.447</b>  | 475.727        |
| 1122.505        | 561.756        | 10 | P | 7  | <b>863.415</b>  | 432.211        |
| <b>1269.574</b> | 635.290        | 11 | F | 6  | <b>766.362</b>  | <b>383.685</b> |
| <b>1384.600</b> | 692.804        | 12 | D | 5  | <b>619.293</b>  | 310.150        |
| <b>1513.643</b> | <b>757.325</b> | 13 | E | 4  | <b>504.266</b>  | 252.637        |
| <b>1626.727</b> | <b>813.867</b> | 14 | L | 3  | <b>375.224</b>  | 188.116        |
| <b>1741.754</b> | <b>871.381</b> | 15 | D | 2  | 262.140         | 131.574        |
| 1869.849        | 935.428        | 16 | K | 1  | 147.113         | 74.060         |

controllerType=0 controllerNumber=1 scan=11826

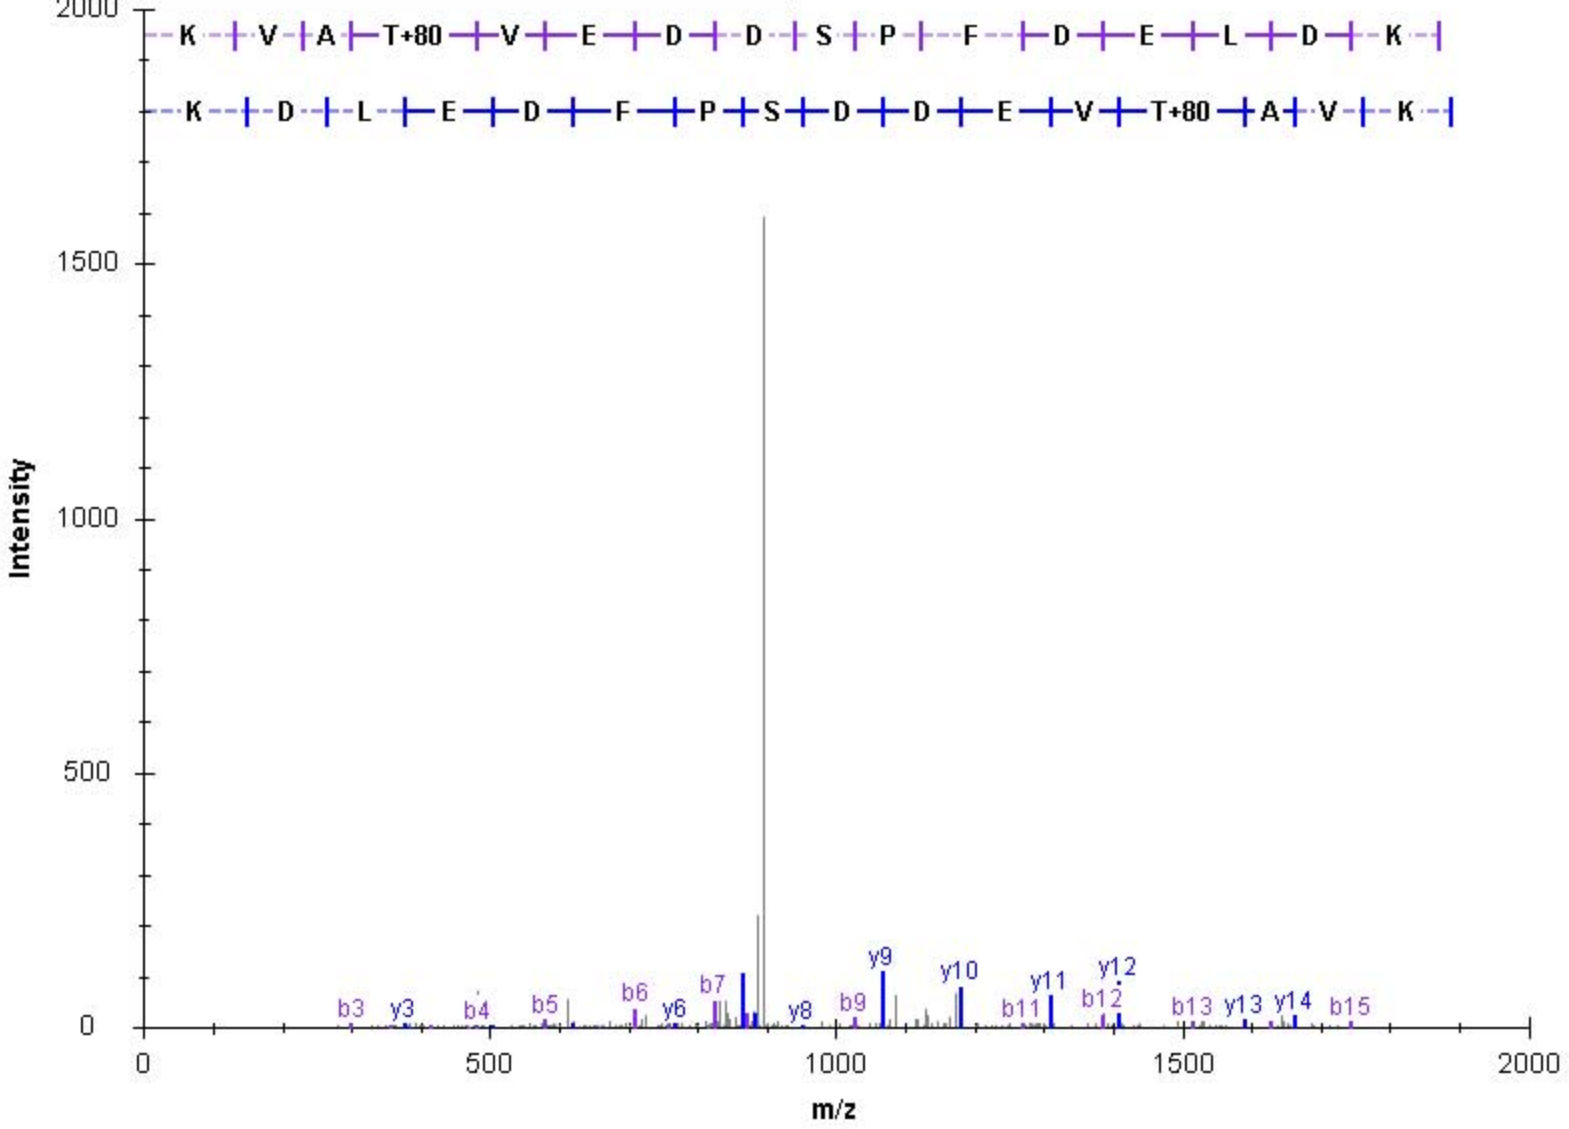

| b               | b(+2)           |    |   | y  | y(+2)           |                 |
|-----------------|-----------------|----|---|----|-----------------|-----------------|
| <b>100.076</b>  | 50.541          | 1  | V | 26 | 2916.280        | 1458.643        |
| 171.113         | 86.060          | 2  | A | 25 | 2817.211        | 1409.109        |
| 352.160         | 176.584         | 3  | T | 24 | 2746.174        | 1373.591        |
| 451.229         | 226.118         | 4  | V | 23 | 2565.126        | <b>1283.067</b> |
| 580.271         | 290.639         | 5  | E | 22 | 2466.058        | <b>1233.533</b> |
| 695.298         | 348.153         | 6  | D | 21 | 2337.015        | <b>1169.011</b> |
| <b>810.325</b>  | 405.666         | 7  | D | 20 | 2221.988        | <b>1111.498</b> |
| 897.357         | 449.182         | 8  | S | 19 | 2106.961        | <b>1053.984</b> |
| <b>994.410</b>  | 497.709         | 9  | P | 18 | 2019.929        | <b>1010.468</b> |
| 1141.479        | 571.243         | 10 | F | 17 | <b>1922.877</b> | <b>961.942</b>  |
| <b>1256.506</b> | 628.756         | 11 | D | 16 | 1775.808        | 888.408         |
| <b>1385.548</b> | 693.278         | 12 | E | 15 | <b>1660.781</b> | 830.894         |
| 1498.632        | 749.820         | 13 | L | 14 | <b>1531.739</b> | 766.373         |
| <b>1613.659</b> | <b>807.333</b>  | 14 | D | 13 | <b>1418.655</b> | 709.831         |
| 1741.754        | 871.381         | 15 | K | 12 | <b>1303.628</b> | 652.317         |
| 1888.823        | 944.915         | 16 | F | 11 | <b>1175.533</b> | 588.270         |
| 1975.855        | <b>988.431</b>  | 17 | S | 10 | 1028.464        | 514.736         |
| 2062.887        | 1031.947        | 18 | S | 9  | <b>941.432</b>  | 471.220         |
| 2159.939        | 1080.473        | 19 | P | 8  | <b>854.400</b>  | 427.704         |
| 2307.008        | 1154.008        | 20 | F | 7  | <b>757.348</b>  | 379.177         |
| 2394.040        | 1197.524        | 21 | S | 6  | <b>610.279</b>  | 305.643         |
| 2481.072        | 1241.040        | 22 | S | 5  | 523.247         | 262.127         |
| 2568.104        | 1284.556        | 23 | S | 4  | 436.215         | 218.611         |
| 2655.136        | <b>1328.072</b> | 24 | S | 3  | 349.183         | 175.095         |
| 2742.168        | <b>1371.588</b> | 25 | S | 2  | 262.151         | 131.579         |
| 2898.269        | 1449.638        | 26 | R | 1  | 175.119         | 88.063          |

controllerType=0 controllerNumber=1 scan=14537

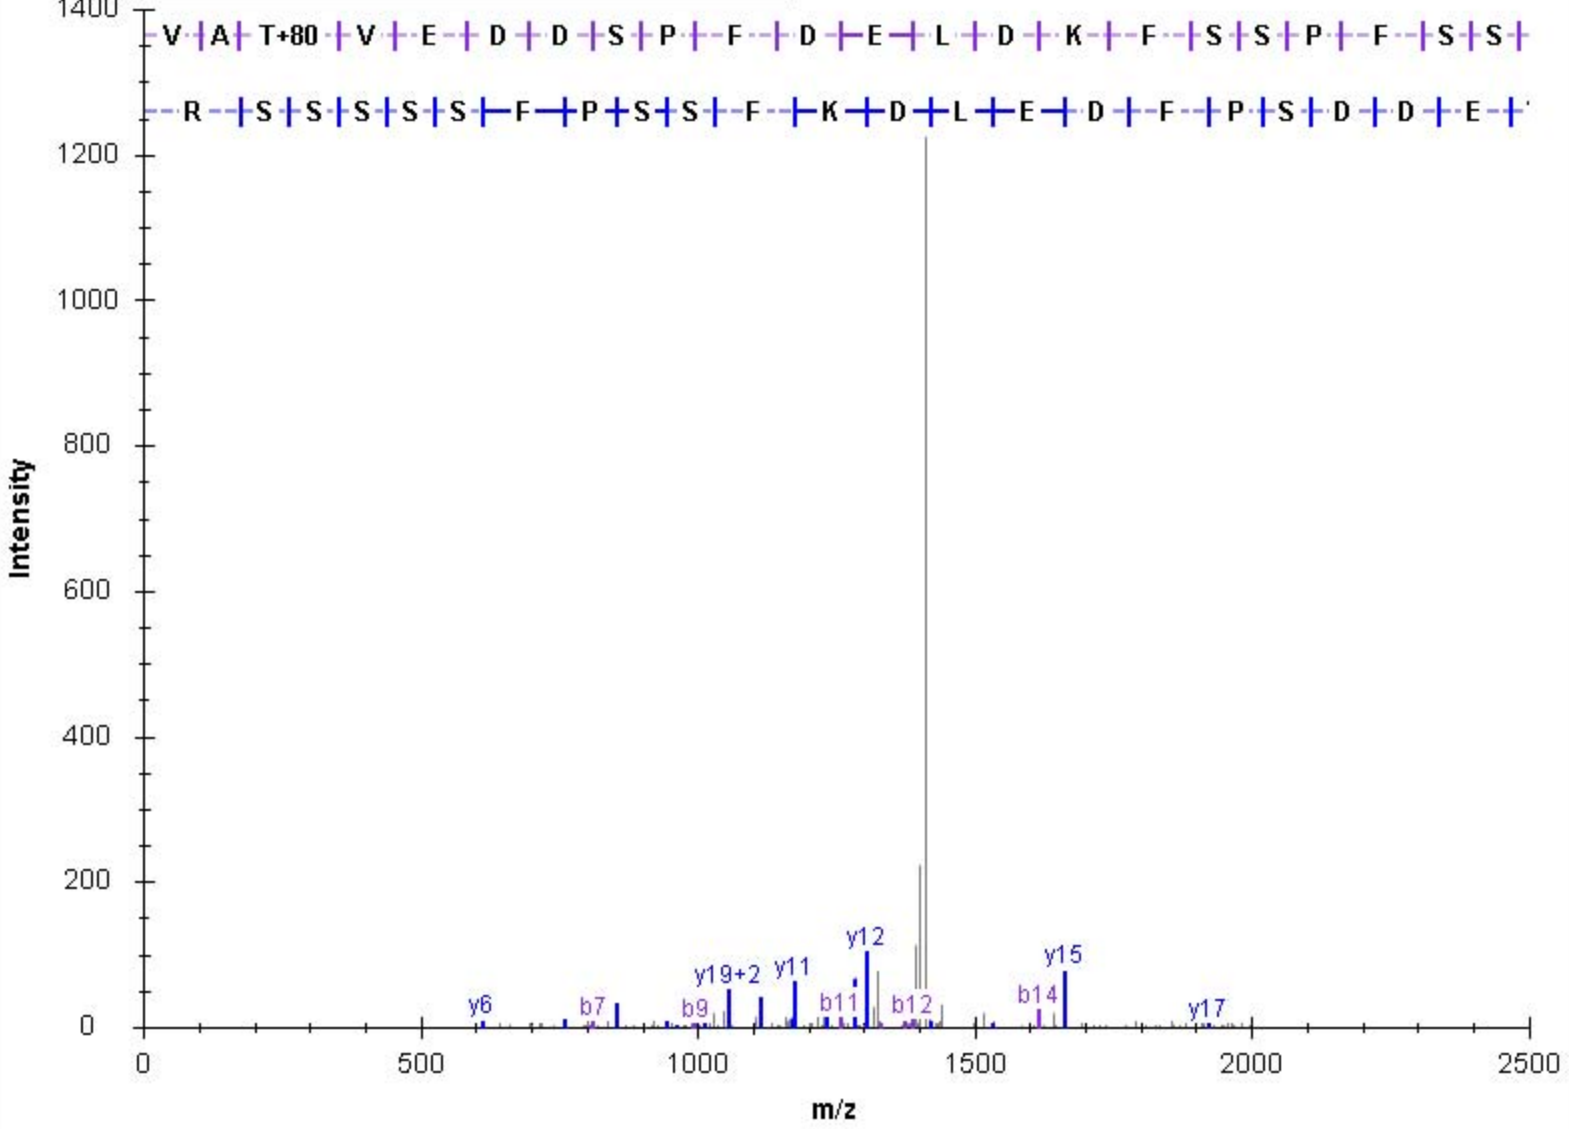



| b               | b(+2)           |    |   | y  | y(+2)           |                 |
|-----------------|-----------------|----|---|----|-----------------|-----------------|
| <b>100.076</b>  | 50.541          | 1  | V | 26 | 2916.280        | 1458.643        |
| 171.113         | 86.060          | 2  | A | 25 | 2817.211        | <b>1409.109</b> |
| 272.160         | 136.584         | 3  | T | 24 | 2746.174        | <b>1373.591</b> |
| <b>371.229</b>  | 186.118         | 4  | V | 23 | 2645.126        | <b>1323.067</b> |
| <b>500.271</b>  | 250.639         | 5  | E | 22 | 2546.058        | <b>1273.533</b> |
| <b>615.298</b>  | 308.153         | 6  | D | 21 | 2417.015        | <b>1209.011</b> |
| <b>730.325</b>  | 365.666         | 7  | D | 20 | 2301.988        | <b>1151.498</b> |
| <b>817.357</b>  | 409.182         | 8  | S | 19 | 2186.961        | <b>1093.984</b> |
| <b>914.410</b>  | 457.709         | 9  | P | 18 | 2099.929        | <b>1050.468</b> |
| 1061.479        | 531.243         | 10 | F | 17 | 2002.877        | 1001.942        |
| <b>1176.506</b> | 588.756         | 11 | D | 16 | 1855.808        | <b>928.408</b>  |
| 1305.548        | 653.278         | 12 | E | 15 | 1740.781        | <b>870.894</b>  |
| 1418.632        | 709.820         | 13 | L | 14 | 1611.739        | 806.373         |
| <b>1533.659</b> | 767.333         | 14 | D | 13 | 1498.655        | <b>749.831</b>  |
| 1661.754        | <b>831.381</b>  | 15 | K | 12 | 1383.628        | <b>692.317</b>  |
| 1808.823        | <b>904.915</b>  | 16 | F | 11 | 1255.533        | 628.270         |
| <b>1895.855</b> | <b>948.431</b>  | 17 | S | 10 | <b>1108.464</b> | 554.736         |
| 2062.887        | <b>1031.947</b> | 18 | S | 9  | <b>1021.432</b> | 511.220         |
| 2159.939        | <b>1080.473</b> | 19 | P | 8  | <b>854.400</b>  | <b>427.704</b>  |
| 2307.008        | 1154.008        | 20 | F | 7  | 757.348         | 379.177         |
| 2394.040        | 1197.524        | 21 | S | 6  | <b>610.279</b>  | 305.643         |
| 2481.072        | 1241.040        | 22 | S | 5  | <b>523.247</b>  | 262.127         |
| 2568.104        | 1284.556        | 23 | S | 4  | <b>436.215</b>  | 218.611         |
| 2655.136        | 1328.072        | 24 | S | 3  | 349.183         | 175.095         |
| 2742.168        | 1371.588        | 25 | S | 2  | 262.151         | 131.579         |
| 2898.269        | 1449.638        | 26 | R | 1  | 175.119         | 88.063          |

controllerType=0 controllerNumber=1 scan=11486

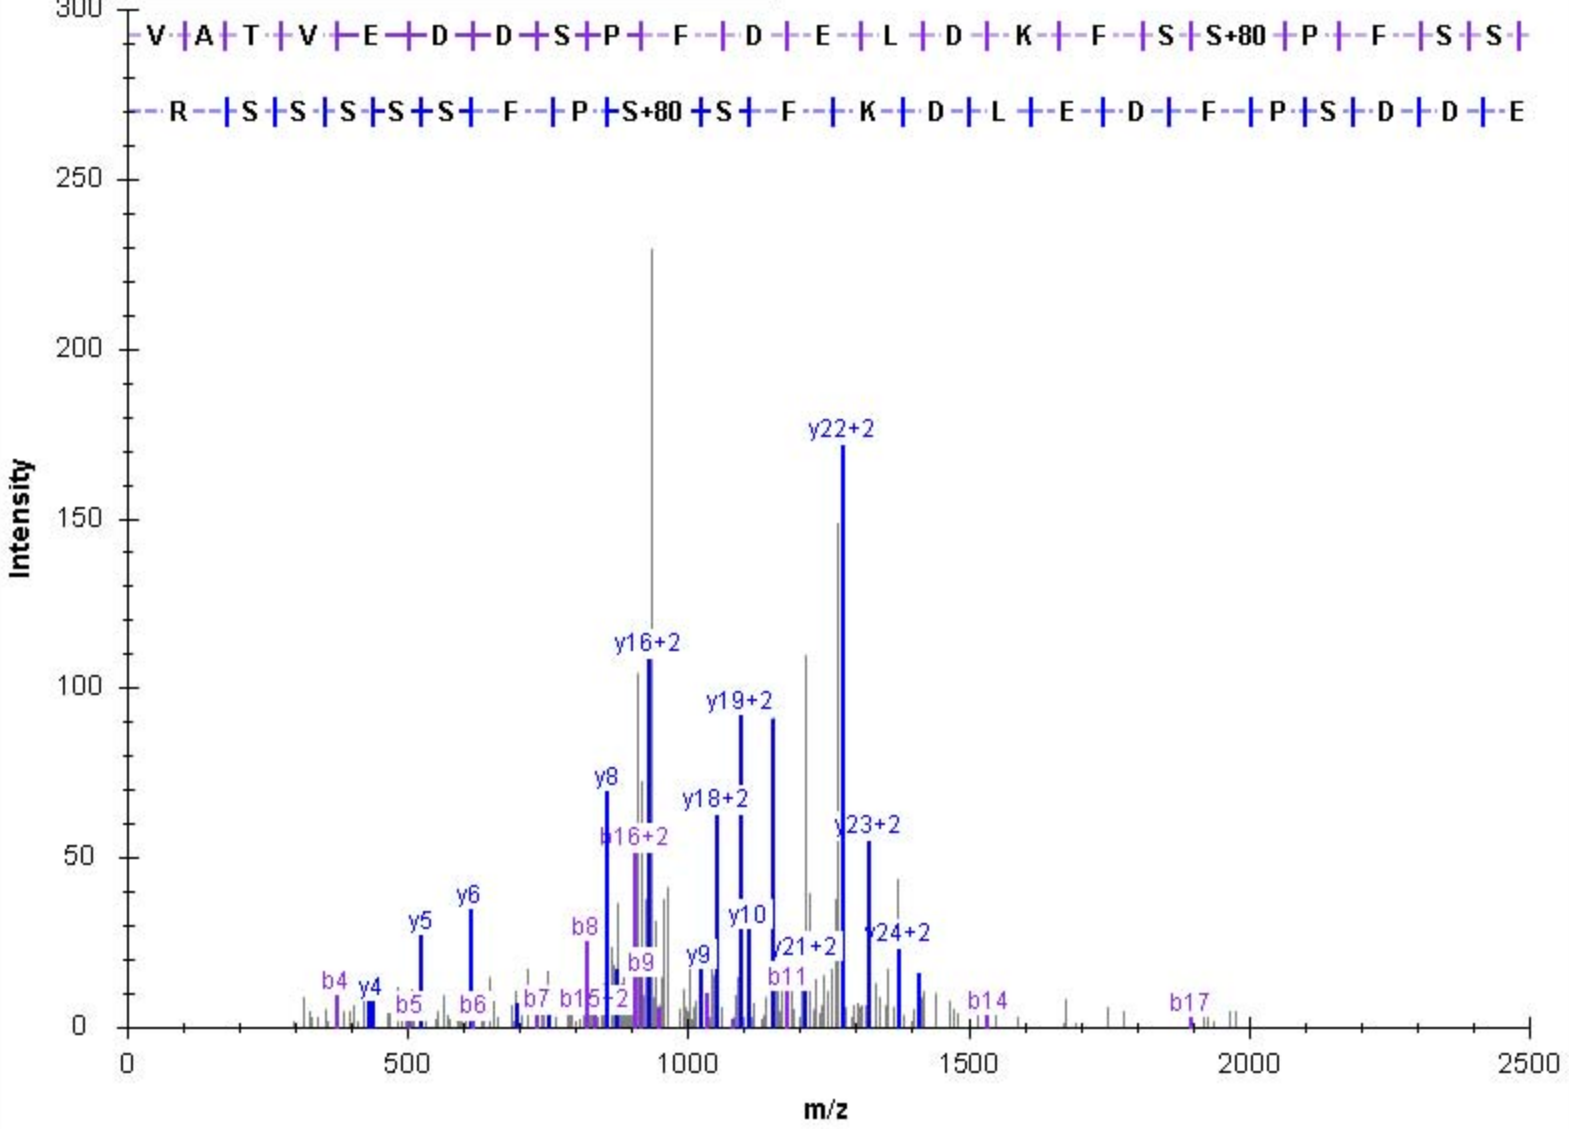

| b               | b(+2)           |    |   | y  | y(+2)           |                 |
|-----------------|-----------------|----|---|----|-----------------|-----------------|
| <b>100.076</b>  | 50.541          | 1  | V | 26 | 2916.280        | 1458.643        |
| 171.113         | 86.060          | 2  | A | 25 | 2817.211        | 1409.109        |
| 272.160         | 136.584         | 3  | T | 24 | 2746.174        | <b>1373.591</b> |
| 371.229         | 186.118         | 4  | V | 23 | 2645.126        | 1323.067        |
| 500.271         | 250.639         | 5  | E | 22 | 2546.058        | <b>1273.533</b> |
| <b>615.298</b>  | 308.153         | 6  | D | 21 | 2417.015        | <b>1209.011</b> |
| <b>730.325</b>  | 365.666         | 7  | D | 20 | 2301.988        | <b>1151.498</b> |
| 817.357         | 409.182         | 8  | S | 19 | 2186.961        | <b>1093.984</b> |
| 914.410         | 457.709         | 9  | P | 18 | 2099.929        | 1050.468        |
| 1061.479        | 531.243         | 10 | F | 17 | 2002.877        | <b>1001.942</b> |
| <b>1176.506</b> | 588.756         | 11 | D | 16 | 1855.808        | 928.408         |
| <b>1305.548</b> | 653.278         | 12 | E | 15 | <b>1740.781</b> | <b>870.894</b>  |
| <b>1418.632</b> | 709.820         | 13 | L | 14 | 1611.739        | <b>806.373</b>  |
| <b>1533.659</b> | 767.333         | 14 | D | 13 | <b>1498.655</b> | 749.831         |
| 1661.754        | 831.381         | 15 | K | 12 | <b>1383.628</b> | 692.317         |
| <b>1808.823</b> | 904.915         | 16 | F | 11 | <b>1255.533</b> | 628.270         |
| 1975.855        | 988.431         | 17 | S | 10 | <b>1108.464</b> | 554.736         |
| 2062.887        | 1031.947        | 18 | S | 9  | <b>941.432</b>  | 471.220         |
| 2159.939        | 1080.473        | 19 | P | 8  | <b>854.400</b>  | 427.704         |
| 2307.008        | 1154.008        | 20 | F | 7  | <b>757.348</b>  | 379.177         |
| 2394.040        | 1197.524        | 21 | S | 6  | <b>610.279</b>  | 305.643         |
| 2481.072        | 1241.040        | 22 | S | 5  | <b>523.247</b>  | 262.127         |
| 2568.104        | <b>1284.556</b> | 23 | S | 4  | 436.215         | 218.611         |
| 2655.136        | 1328.072        | 24 | S | 3  | 349.183         | 175.095         |
| 2742.168        | 1371.588        | 25 | S | 2  | 262.151         | 131.579         |
| 2898.269        | 1449.638        | 26 | R | 1  | 175.119         | 88.063          |

controllerType=0 controllerNumber=1 scan=11504

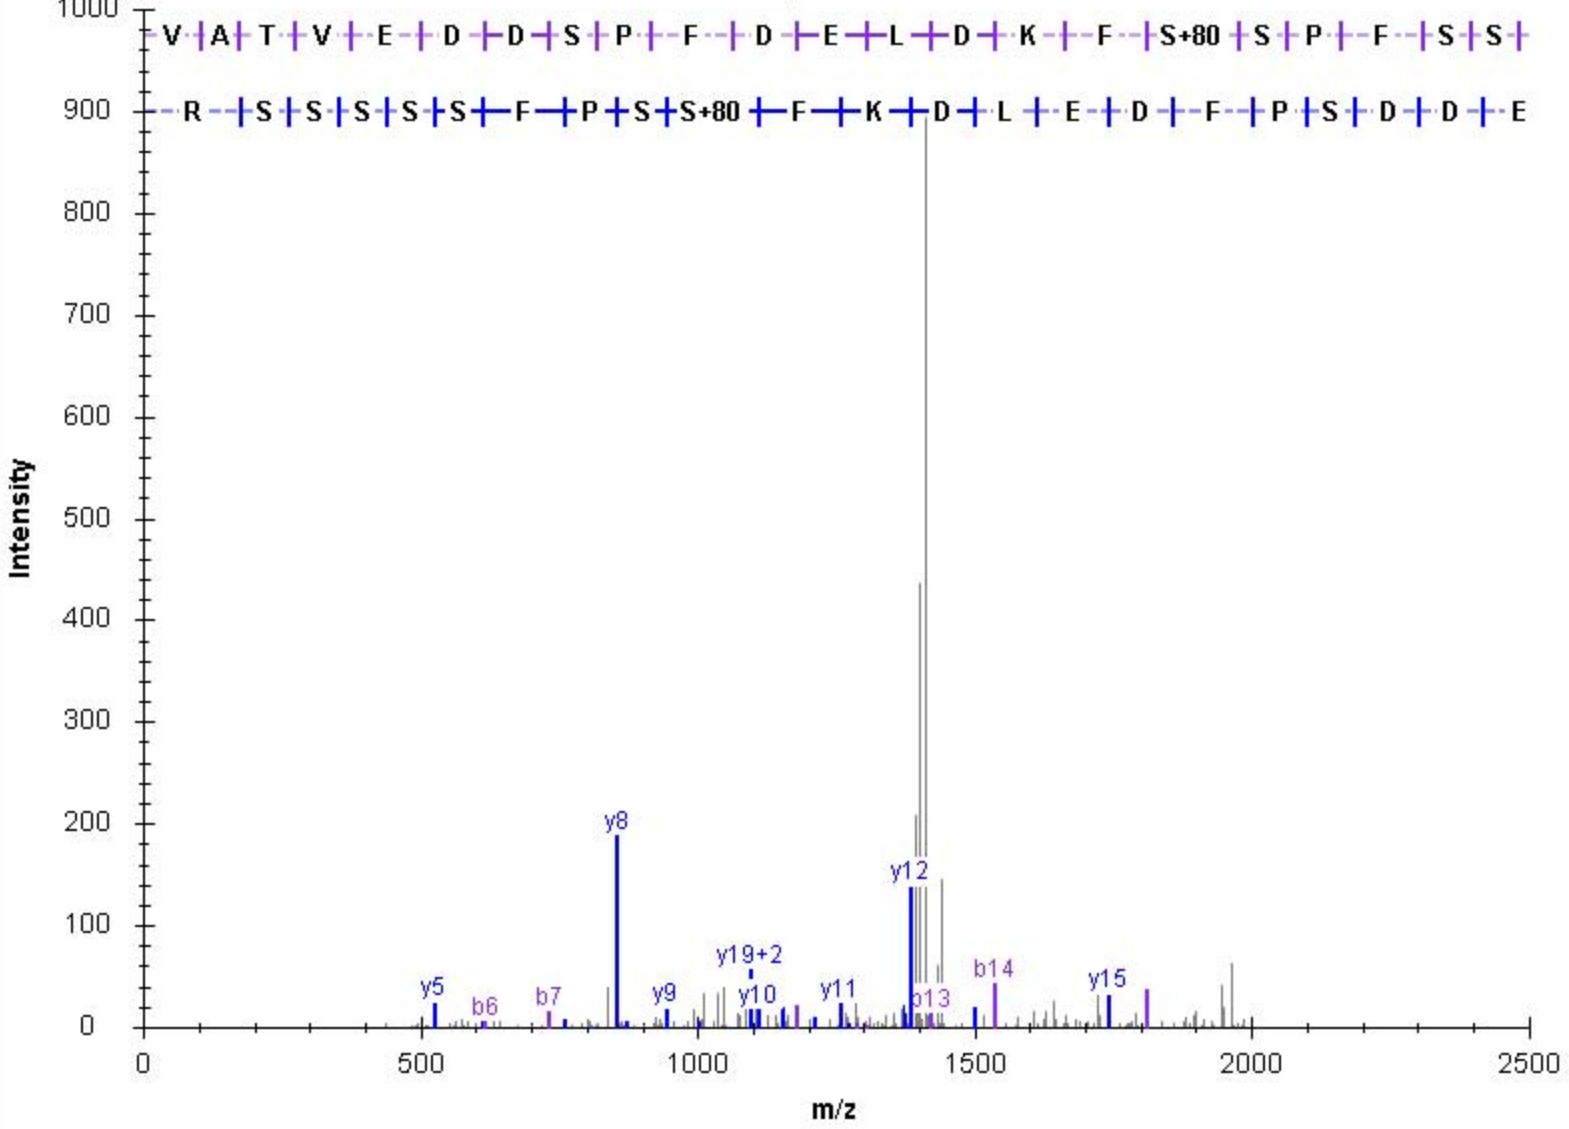

| b               | b(+2)           |    |   | y  | y(+2)           |                 |
|-----------------|-----------------|----|---|----|-----------------|-----------------|
| <b>100.076</b>  | 50.541          | 1  | V | 26 | 2916.280        | 1458.643        |
| 171.113         | 86.060          | 2  | A | 25 | 2817.211        | 1409.109        |
| 272.160         | 136.584         | 3  | T | 24 | 2746.174        | <b>1373.591</b> |
| 371.229         | 186.118         | 4  | V | 23 | 2645.126        | 1323.067        |
| 500.271         | 250.639         | 5  | E | 22 | 2546.058        | 1273.533        |
| <b>615.298</b>  | 308.153         | 6  | D | 21 | 2417.015        | <b>1209.011</b> |
| <b>730.325</b>  | 365.666         | 7  | D | 20 | 2301.988        | <b>1151.498</b> |
| <b>817.357</b>  | 409.182         | 8  | S | 19 | 2186.961        | <b>1093.984</b> |
| 914.410         | 457.709         | 9  | P | 18 | 2099.929        | 1050.468        |
| 1061.479        | 531.243         | 10 | F | 17 | 2002.877        | <b>1001.942</b> |
| <b>1176.506</b> | 588.756         | 11 | D | 16 | <b>1855.808</b> | <b>928.408</b>  |
| <b>1305.548</b> | 653.278         | 12 | E | 15 | <b>1740.781</b> | <b>870.894</b>  |
| <b>1418.632</b> | 709.820         | 13 | L | 14 | <b>1611.739</b> | <b>806.373</b>  |
| <b>1533.659</b> | 767.333         | 14 | D | 13 | <b>1498.655</b> | 749.831         |
| <b>1661.754</b> | 831.381         | 15 | K | 12 | <b>1383.628</b> | 692.317         |
| <b>1808.823</b> | 904.915         | 16 | F | 11 | <b>1255.533</b> | 628.270         |
| <b>1895.855</b> | 948.431         | 17 | S | 10 | <b>1108.464</b> | 554.736         |
| <b>1982.887</b> | <b>991.947</b>  | 18 | S | 9  | <b>1021.432</b> | 511.220         |
| 2079.939        | 1040.473        | 19 | P | 8  | <b>934.400</b>  | <b>467.704</b>  |
| 2227.008        | 1114.008        | 20 | F | 7  | <b>837.348</b>  | 419.177         |
| 2314.040        | <b>1157.524</b> | 21 | S | 6  | <b>690.279</b>  | 345.643         |
| 2481.072        | 1241.040        | 22 | S | 5  | <b>603.247</b>  | 302.127         |
| 2568.104        | 1284.556        | 23 | S | 4  | 436.215         | 218.611         |
| 2655.136        | 1328.072        | 24 | S | 3  | 349.183         | 175.095         |
| 2742.168        | 1371.588        | 25 | S | 2  | 262.151         | 131.579         |
| 2898.269        | 1449.638        | 26 | R | 1  | 175.119         | 88.063          |

controllerType=0 controllerNumber=1 scan=14599

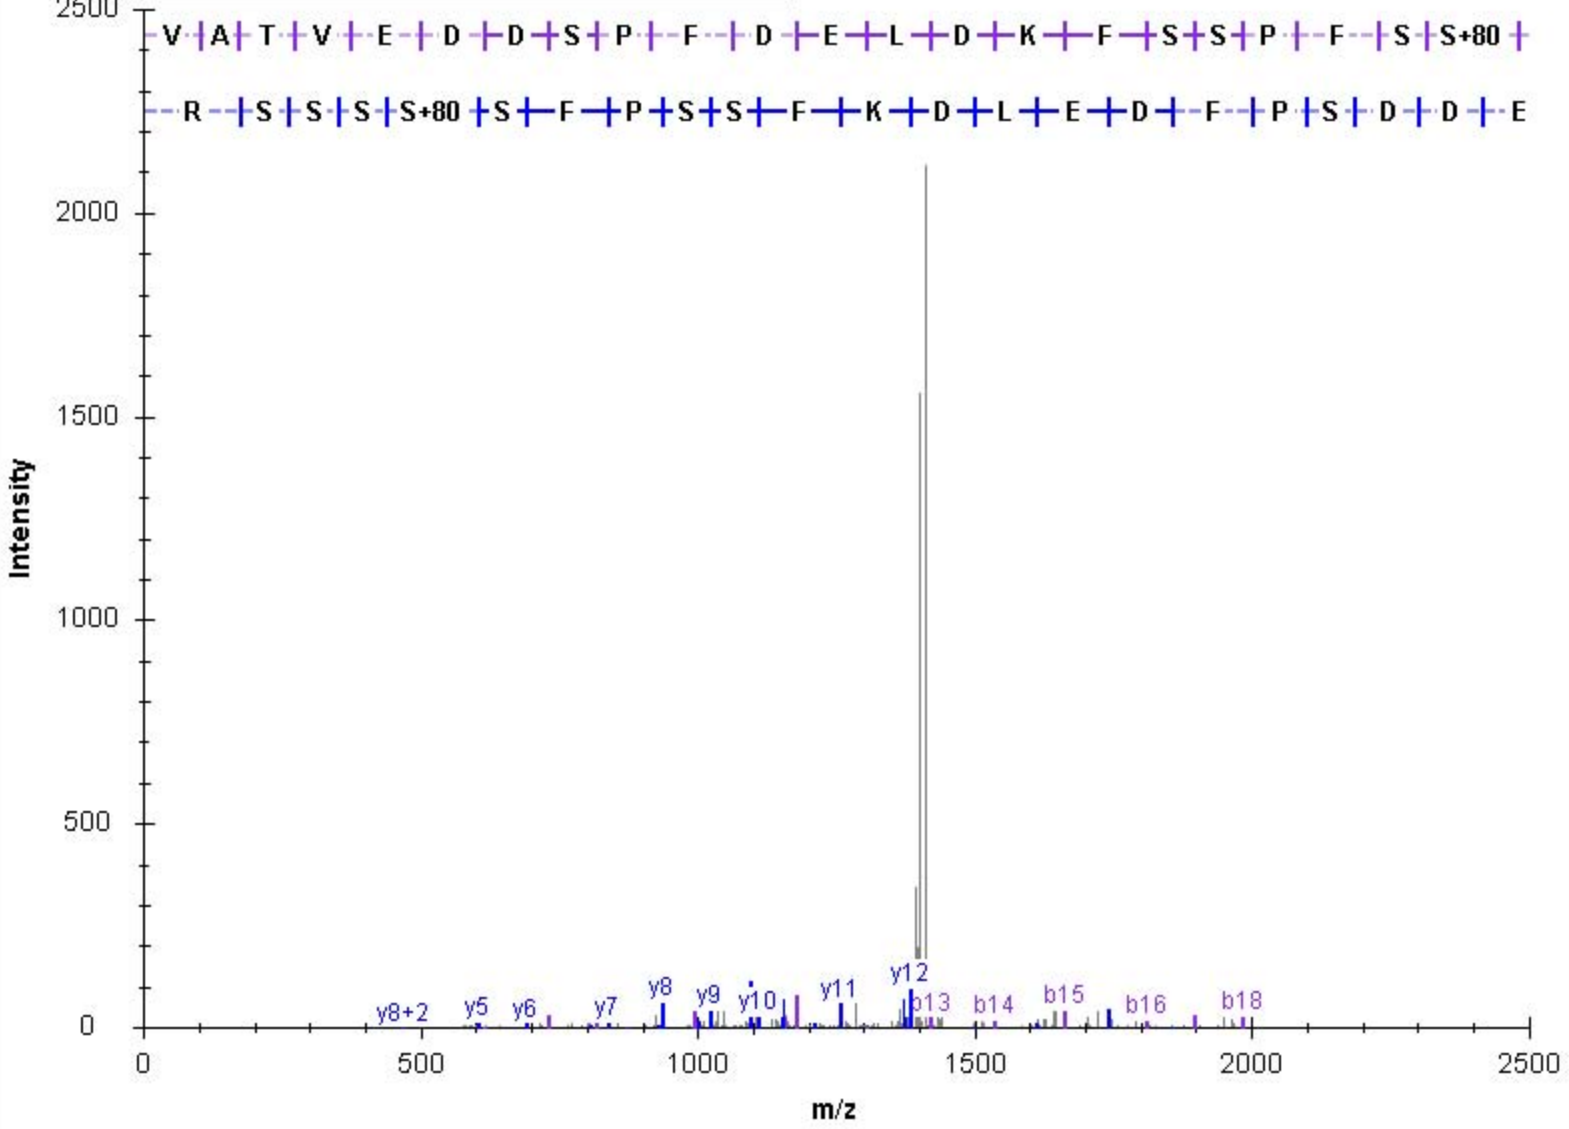

| b               | b(+2)           |    |   |    | y               | y(+2)           |
|-----------------|-----------------|----|---|----|-----------------|-----------------|
| <b>115.050</b>  | 58.029          | 1  | N | 23 | 2552.334        | 1276.671        |
| 214.119         | 107.563         | 2  | V | 22 | 2438.292        | <b>1219.649</b> |
| 301.151         | 151.079         | 3  | S | 21 | 2339.223        | 1170.115        |
| 414.235         | 207.621         | 4  | I | 20 | 2252.191        | <b>1126.599</b> |
| <b>581.267</b>  | 291.137         | 5  | S | 19 | 2139.107        | 1070.057        |
| <b>680.335</b>  | 340.671         | 6  | V | 18 | <b>1972.075</b> | <b>986.541</b>  |
| 777.388         | <b>389.198</b>  | 7  | P | 17 | <b>1873.007</b> | <b>937.007</b>  |
| 878.436         | 439.721         | 8  | T | 16 | <b>1775.954</b> | <b>888.481</b>  |
| <b>977.504</b>  | 489.256         | 9  | V | 15 | <b>1674.906</b> | 837.957         |
| <b>1090.588</b> | <b>545.798</b>  | 10 | L | 14 | <b>1575.838</b> | 788.422         |
| <b>1218.647</b> | 609.827         | 11 | Q | 13 | <b>1462.754</b> | 731.880         |
| <b>1333.674</b> | <b>667.340</b>  | 12 | D | 12 | <b>1334.695</b> | 667.851         |
| <b>1432.742</b> | 716.875         | 13 | V | 11 | <b>1219.668</b> | 610.338         |
| <b>1579.810</b> | 790.409         | 14 | F | 10 | <b>1120.600</b> | 560.803         |
| <b>1666.842</b> | <b>833.925</b>  | 15 | S | 9  | <b>973.531</b>  | 487.269         |
| <b>1781.869</b> | 891.438         | 16 | D | 8  | <b>886.499</b>  | 443.753         |
| <b>1868.901</b> | 934.954         | 17 | S | 7  | <b>771.472</b>  | 386.240         |
| 1965.954        | 983.481         | 18 | P | 6  | <b>684.440</b>  | 342.724         |
| 2079.038        | 1040.023        | 19 | L | 5  | 587.388         | 294.197         |
| 2178.107        | 1089.557        | 20 | V | 4  | <b>474.303</b>  | 237.655         |
| 2291.191        | 1146.099        | 21 | L | 3  | <b>375.235</b>  | 188.121         |
| 2378.223        | <b>1189.615</b> | 22 | S | 2  | 262.151         | 131.579         |
| 2534.324        | 1267.666        | 23 | R | 1  | 175.119         | 88.063          |

controllerType=0 controllerNumber=1 scan=13304

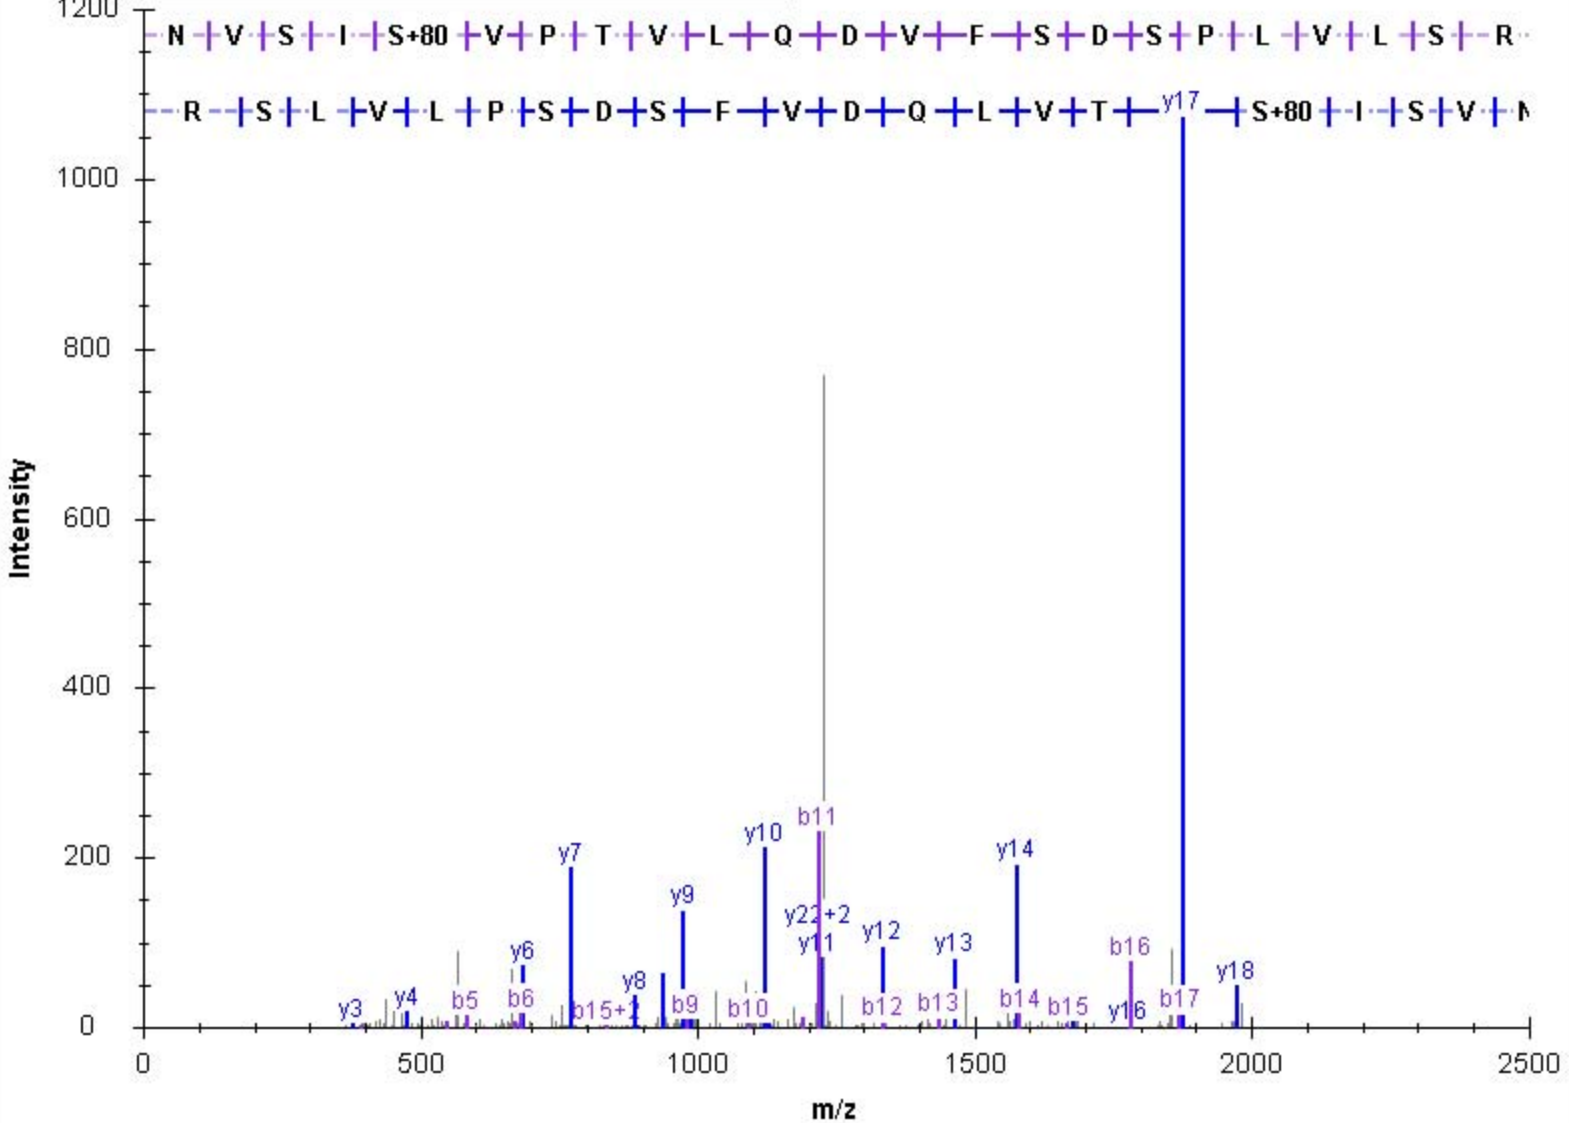

N V S I S+80 V P T V L Q D V F S D S P L V L S R  
R S L V L P S D S F V D Q L V T S+80 I S V M



| b               | b(+2)          |    |   |    | y               | y(+2)          |
|-----------------|----------------|----|---|----|-----------------|----------------|
| <b>58.029</b>   | 29.518         | 1  | G | 14 | 1580.827        | 790.917        |
| 186.124         | 93.565         | 2  | K | 13 | 1523.805        | <b>762.406</b> |
| <b>299.208</b>  | 150.108        | 3  | I | 12 | <b>1395.710</b> | <b>698.359</b> |
| <b>396.261</b>  | 198.634        | 4  | P | 11 | <b>1282.626</b> | <b>641.817</b> |
| <b>525.303</b>  | <b>263.155</b> | 5  | E | 10 | <b>1185.574</b> | <b>593.290</b> |
| <b>639.346</b>  | 320.177        | 6  | N | 9  | <b>1056.531</b> | <b>528.769</b> |
| <b>738.414</b>  | <b>369.711</b> | 7  | V | 8  | <b>942.488</b>  | <b>471.748</b> |
| <b>905.446</b>  | 453.227        | 8  | S | 7  | <b>843.420</b>  | 422.213        |
| <b>992.479</b>  | 496.743        | 9  | S | 6  | <b>676.388</b>  | 338.697        |
| <b>1079.511</b> | 540.259        | 10 | S | 5  | <b>589.356</b>  | 295.181        |
| <b>1208.553</b> | <b>604.780</b> | 11 | E | 4  | <b>502.324</b>  | <b>251.665</b> |
| <b>1321.637</b> | <b>661.322</b> | 12 | L | 3  | <b>373.281</b>  | 187.144        |
| <b>1434.721</b> | 717.864        | 13 | I | 2  | <b>260.197</b>  | 130.602        |
| 1562.816        | <b>781.912</b> | 14 | K | 1  | 147.113         | 74.060         |

controllerType=0 controllerNumber=1 scan=10650

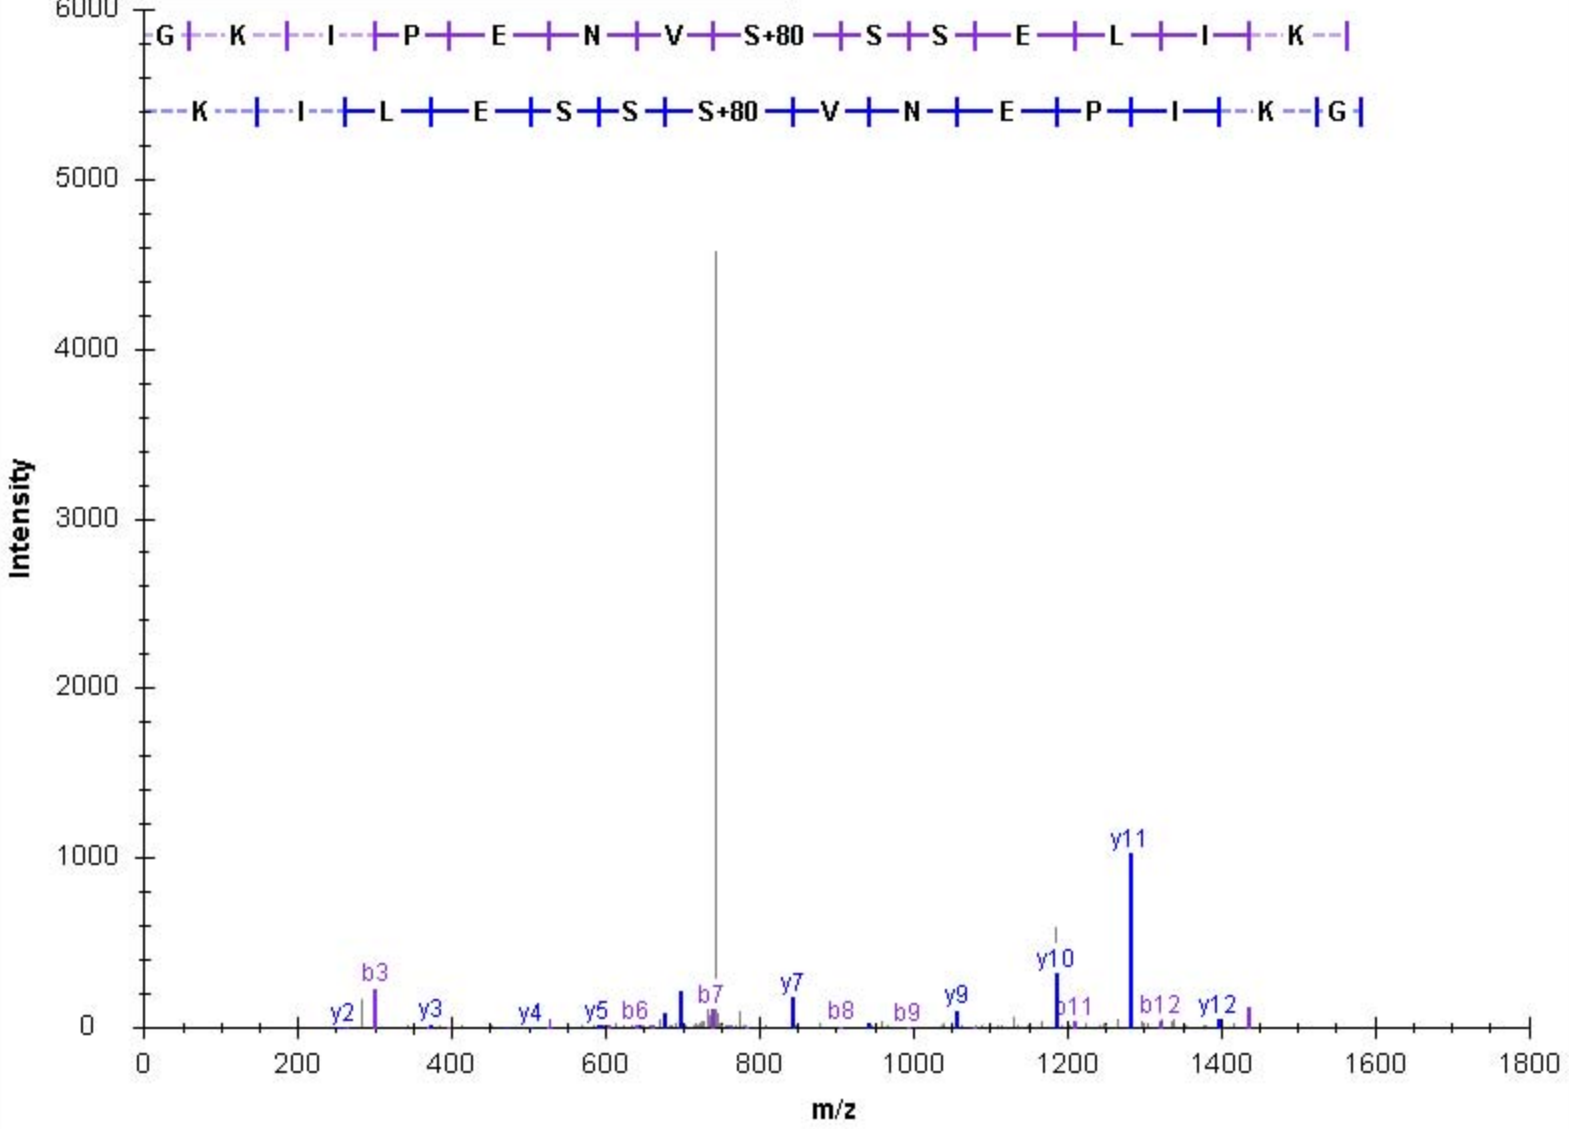

| b               | b(+2)          |    |   |    | y               | y(+2)          |
|-----------------|----------------|----|---|----|-----------------|----------------|
| <b>58.029</b>   | 29.518         | 1  | G | 15 | 1708.922        | 854.965        |
| 186.124         | 93.565         | 2  | K | 14 | 1651.900        | <b>826.454</b> |
| <b>299.208</b>  | 150.108        | 3  | I | 13 | <b>1523.805</b> | <b>762.406</b> |
| <b>396.261</b>  | 198.634        | 4  | P | 12 | <b>1410.721</b> | <b>705.864</b> |
| <b>525.303</b>  | 263.155        | 5  | E | 11 | <b>1313.669</b> | <b>657.338</b> |
| <b>639.346</b>  | 320.177        | 6  | N | 10 | <b>1184.626</b> | 592.817        |
| <b>738.414</b>  | <b>369.711</b> | 7  | V | 9  | <b>1070.583</b> | 535.795        |
| <b>825.446</b>  | 413.227        | 8  | S | 8  | <b>971.515</b>  | 486.261        |
| 912.479         | 456.743        | 9  | S | 7  | 884.483         | <b>442.745</b> |
| <b>1079.511</b> | 540.259        | 10 | S | 6  | <b>797.451</b>  | 399.229        |
| <b>1208.553</b> | <b>604.780</b> | 11 | E | 5  | <b>630.418</b>  | 315.713        |
| <b>1321.637</b> | 661.322        | 12 | L | 4  | <b>501.376</b>  | 251.192        |
| <b>1434.721</b> | 717.864        | 13 | I | 3  | 388.292         | 194.650        |
| <b>1562.816</b> | <b>781.912</b> | 14 | K | 2  | 275.208         | 138.108        |
| 1690.911        | <b>845.959</b> | 15 | K | 1  | 147.113         | 74.060         |

controllerType=0 controllerNumber=1 scan=8203

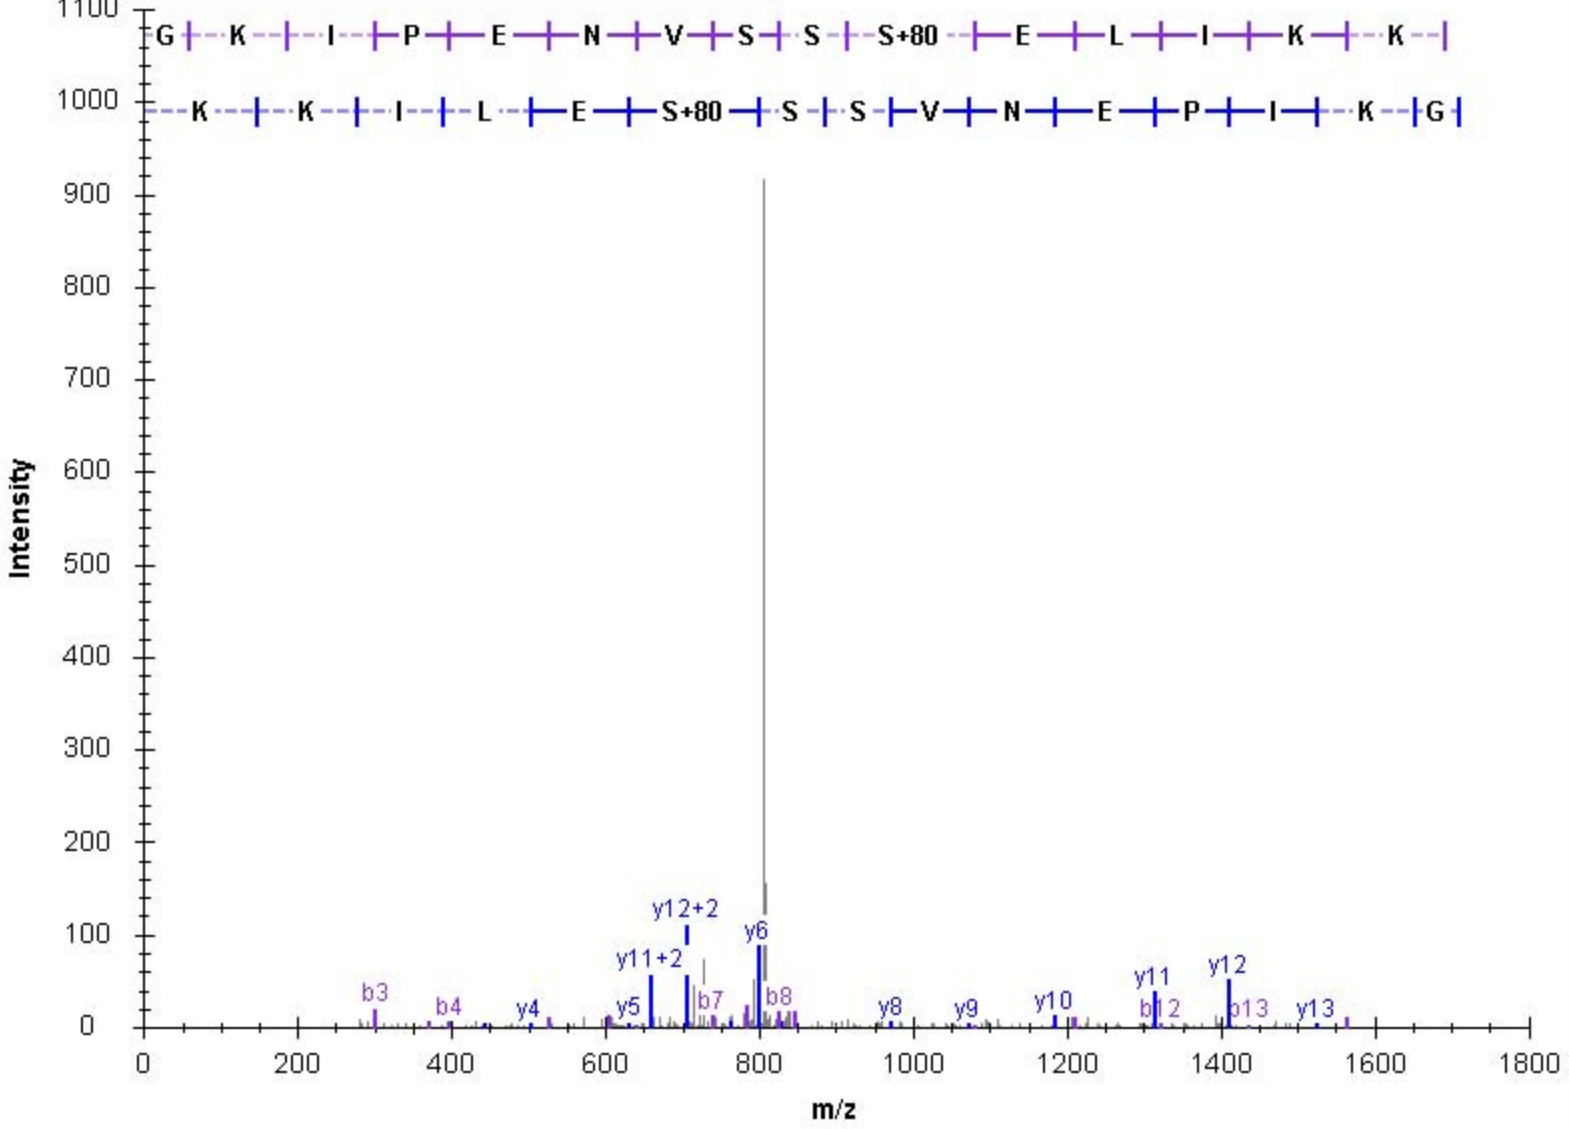

| b               | b(+2)          |    |   |    | y               | y(+2)          |
|-----------------|----------------|----|---|----|-----------------|----------------|
| 114.091         | 57.549         | 1  | I | 12 | 1395.710        | 698.359        |
| <b>211.144</b>  | 106.076        | 2  | P | 11 | <b>1282.626</b> | <b>641.817</b> |
| <b>340.187</b>  | 170.597        | 3  | E | 10 | <b>1185.574</b> | <b>593.290</b> |
| <b>454.230</b>  | 227.618        | 4  | N | 9  | <b>1056.531</b> | <b>528.769</b> |
| <b>553.298</b>  | 277.153        | 5  | V | 8  | <b>942.488</b>  | 471.748        |
| <b>720.330</b>  | 360.669        | 6  | S | 7  | <b>843.420</b>  | 422.213        |
| 807.362         | <b>404.185</b> | 7  | S | 6  | <b>676.388</b>  | 338.697        |
| 894.394         | 447.701        | 8  | S | 5  | <b>589.356</b>  | 295.181        |
| <b>1023.437</b> | <b>512.222</b> | 9  | E | 4  | <b>502.324</b>  | 251.665        |
| <b>1136.521</b> | <b>568.764</b> | 10 | L | 3  | <b>373.281</b>  | 187.144        |
| <b>1249.605</b> | 625.306        | 11 | I | 2  | <b>260.197</b>  | 130.602        |
| 1377.700        | <b>689.354</b> | 12 | K | 1  | 147.113         | 74.060         |

controllerType=0 controllerNumber=1 scan=9744

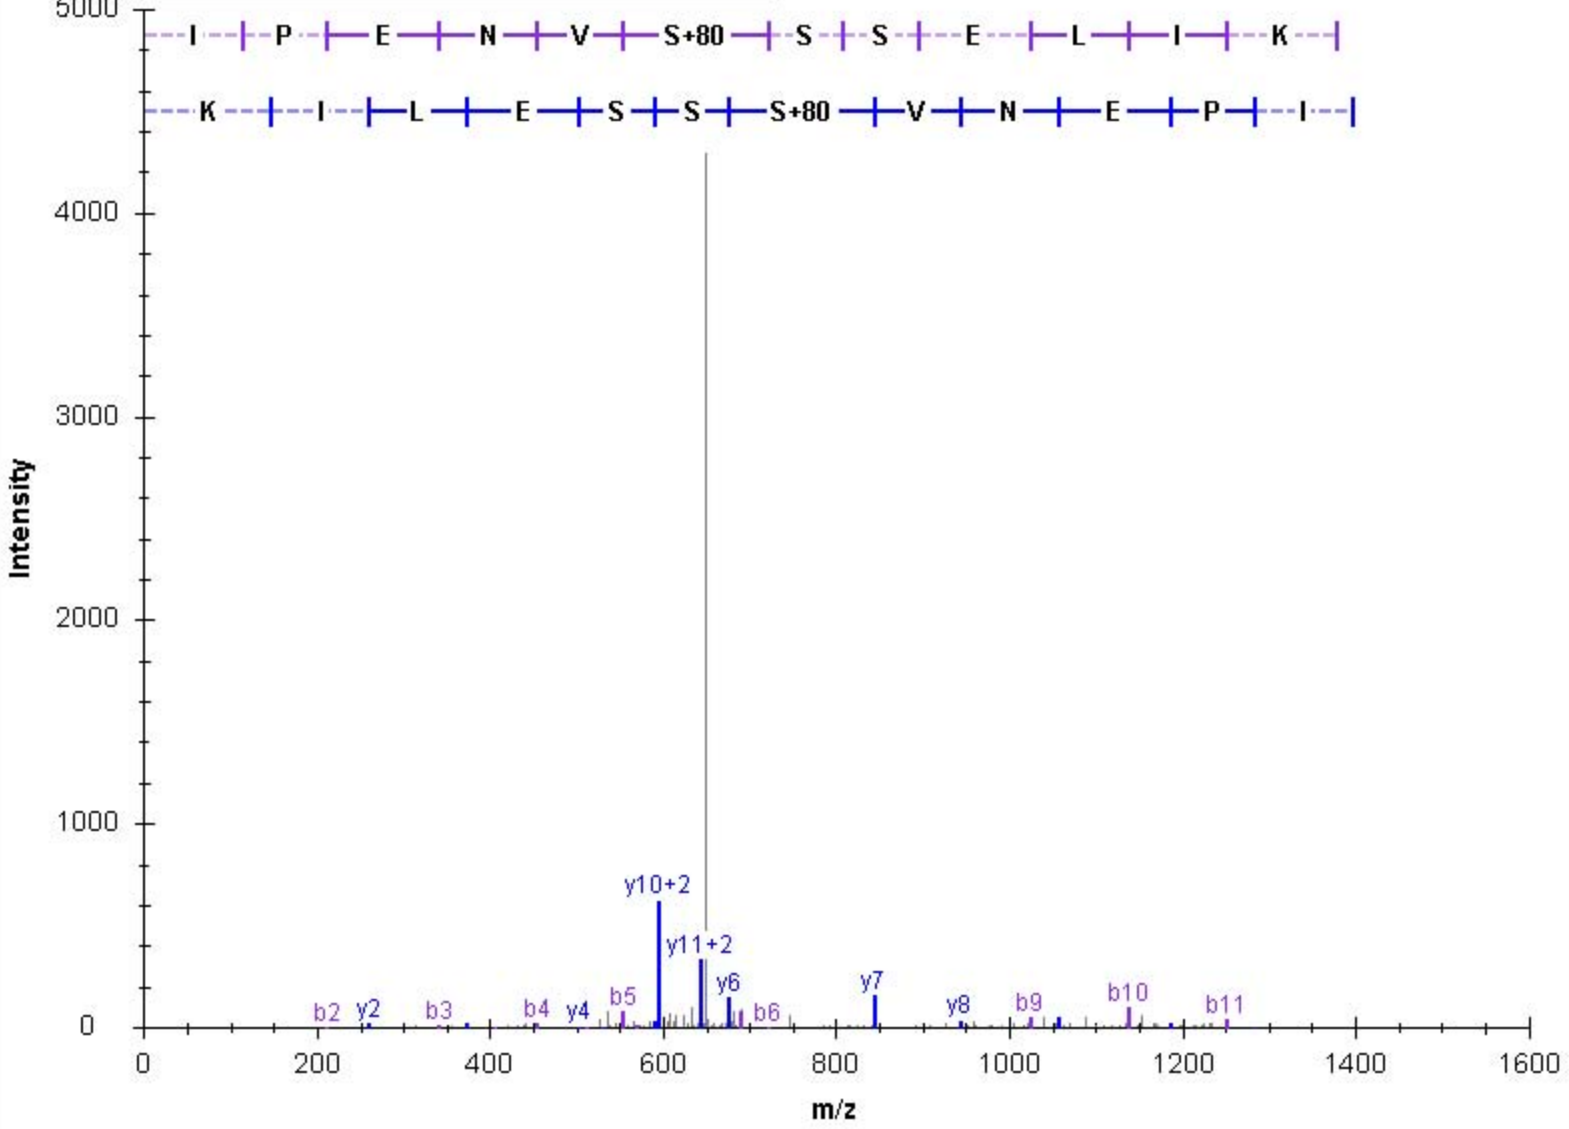

| b               | b(+2)          |    |   |    | y               | y(+2)          |
|-----------------|----------------|----|---|----|-----------------|----------------|
| 114.091         | 57.549         | 1  | I | 13 | 1523.805        | 762.406        |
| 211.144         | 106.076        | 2  | P | 12 | <b>1410.721</b> | <b>705.864</b> |
| <b>340.187</b>  | 170.597        | 3  | E | 11 | <b>1313.669</b> | <b>657.338</b> |
| <b>454.230</b>  | <b>227.618</b> | 4  | N | 10 | <b>1184.626</b> | <b>592.817</b> |
| <b>553.298</b>  | <b>277.153</b> | 5  | V | 9  | <b>1070.583</b> | <b>535.795</b> |
| <b>720.330</b>  | <b>360.669</b> | 6  | S | 8  | <b>971.515</b>  | <b>486.261</b> |
| 807.362         | <b>404.185</b> | 7  | S | 7  | <b>804.483</b>  | 402.745        |
| 894.394         | 447.701        | 8  | S | 6  | <b>717.451</b>  | <b>359.229</b> |
| <b>1023.437</b> | 512.222        | 9  | E | 5  | <b>630.418</b>  | 315.713        |
| <b>1136.521</b> | <b>568.764</b> | 10 | L | 4  | <b>501.376</b>  | <b>251.192</b> |
| <b>1249.605</b> | 625.306        | 11 | I | 3  | <b>388.292</b>  | 194.650        |
| <b>1377.700</b> | <b>689.354</b> | 12 | K | 2  | <b>275.208</b>  | 138.108        |
| 1505.795        | <b>753.401</b> | 13 | K | 1  | 147.113         | 74.060         |

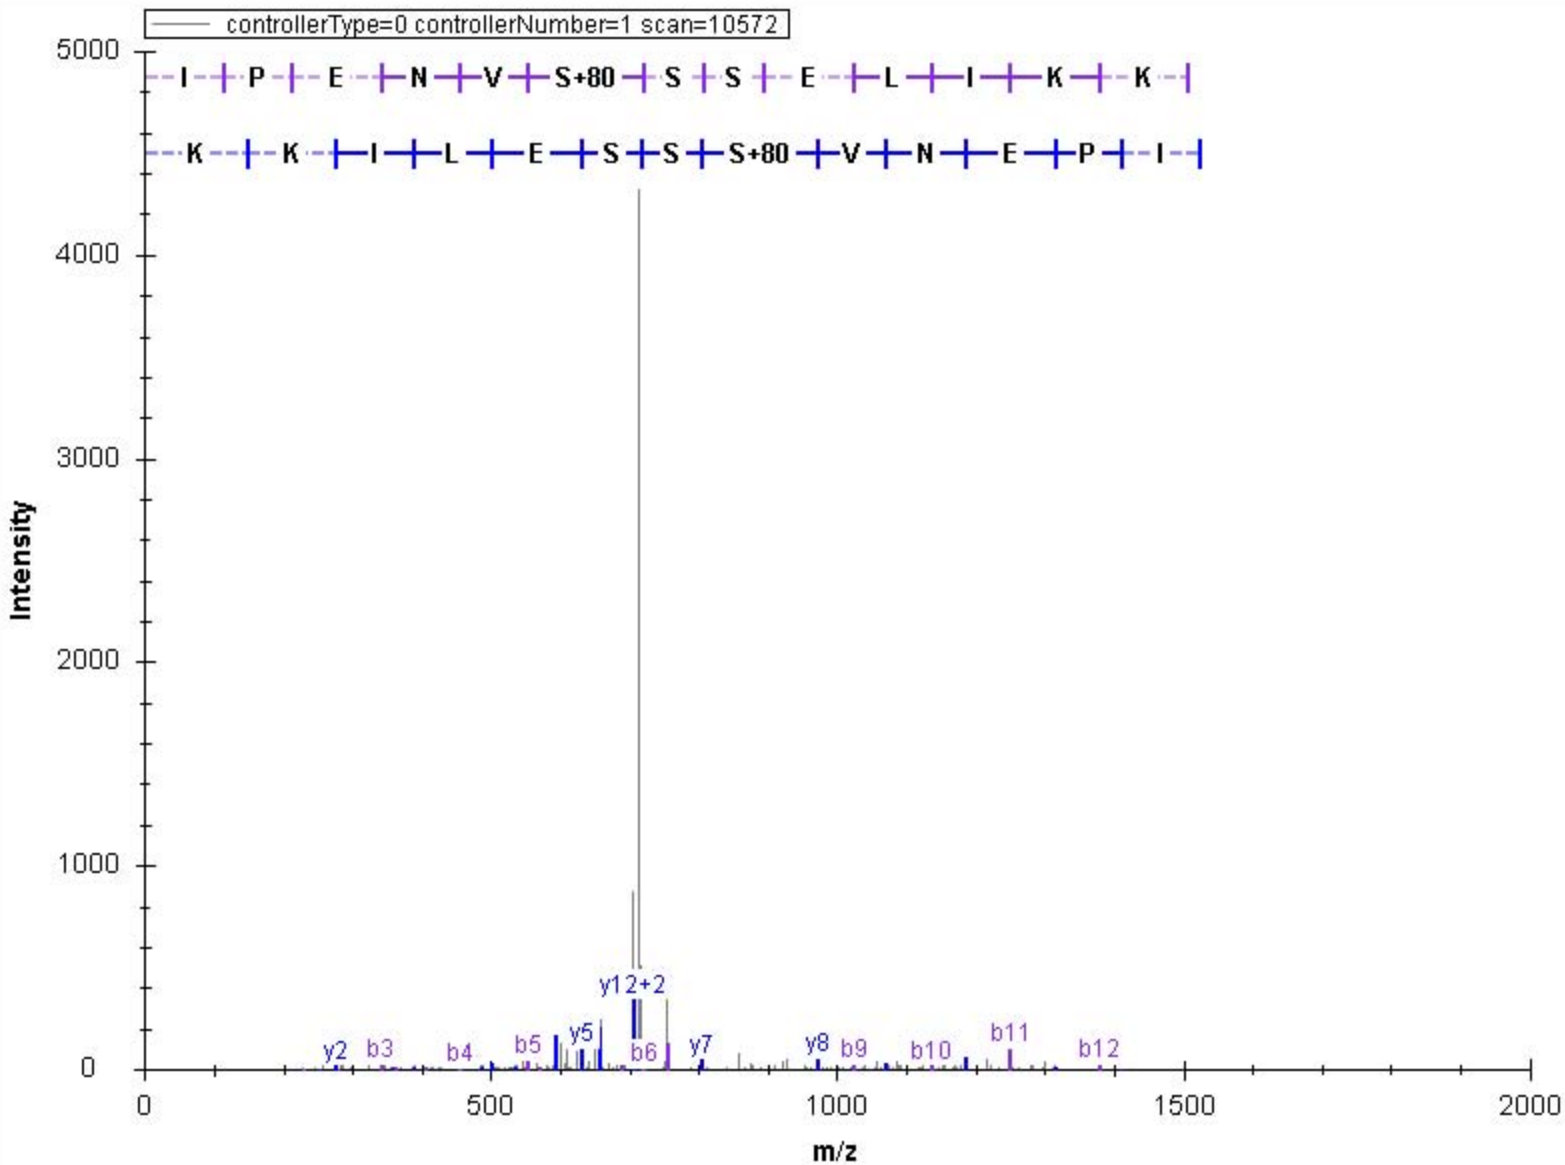



| b               | b(+2)          |    |   |    | y               | y(+2)          |
|-----------------|----------------|----|---|----|-----------------|----------------|
| 100.076         | 50.541         | 1  | V | 16 | 1745.738        | 873.373        |
| 171.113         | 86.060         | 2  | A | 15 | 1646.670        | 823.839        |
| <b>258.145</b>  | 129.576        | 3  | S | 14 | <b>1575.633</b> | <b>788.320</b> |
| <b>355.198</b>  | 178.102        | 4  | P | 13 | <b>1488.601</b> | <b>744.804</b> |
| <b>484.240</b>  | 242.624        | 5  | E | 12 | <b>1391.548</b> | <b>696.278</b> |
| <b>598.283</b>  | 299.645        | 6  | N | 11 | <b>1262.506</b> | <b>631.756</b> |
| <b>685.315</b>  | 343.161        | 7  | S | 10 | <b>1148.463</b> | <b>574.735</b> |
| <b>772.347</b>  | 386.677        | 8  | S | 9  | <b>1061.431</b> | 531.219        |
| <b>886.390</b>  | 443.699        | 9  | N | 8  | <b>974.399</b>  | 487.703        |
| <b>1053.422</b> | <b>527.215</b> | 10 | S | 7  | <b>860.356</b>  | 430.681        |
| <b>1184.463</b> | 592.735        | 11 | M | 6  | <b>693.324</b>  | 347.165        |
| <b>1313.505</b> | <b>657.256</b> | 12 | E | 5  | <b>562.283</b>  | 281.645        |
| <b>1427.548</b> | <b>714.278</b> | 13 | N | 4  | <b>433.241</b>  | 217.124        |
| <b>1498.585</b> | 749.796        | 14 | A | 3  | <b>319.198</b>  | 160.102        |
| <b>1599.633</b> | 800.320        | 15 | T | 2  | <b>248.160</b>  | 124.584        |
| 1727.728        | 864.368        | 16 | K | 1  | 147.113         | 74.060         |

controllerType=0 controllerNumber=1 scan=7173

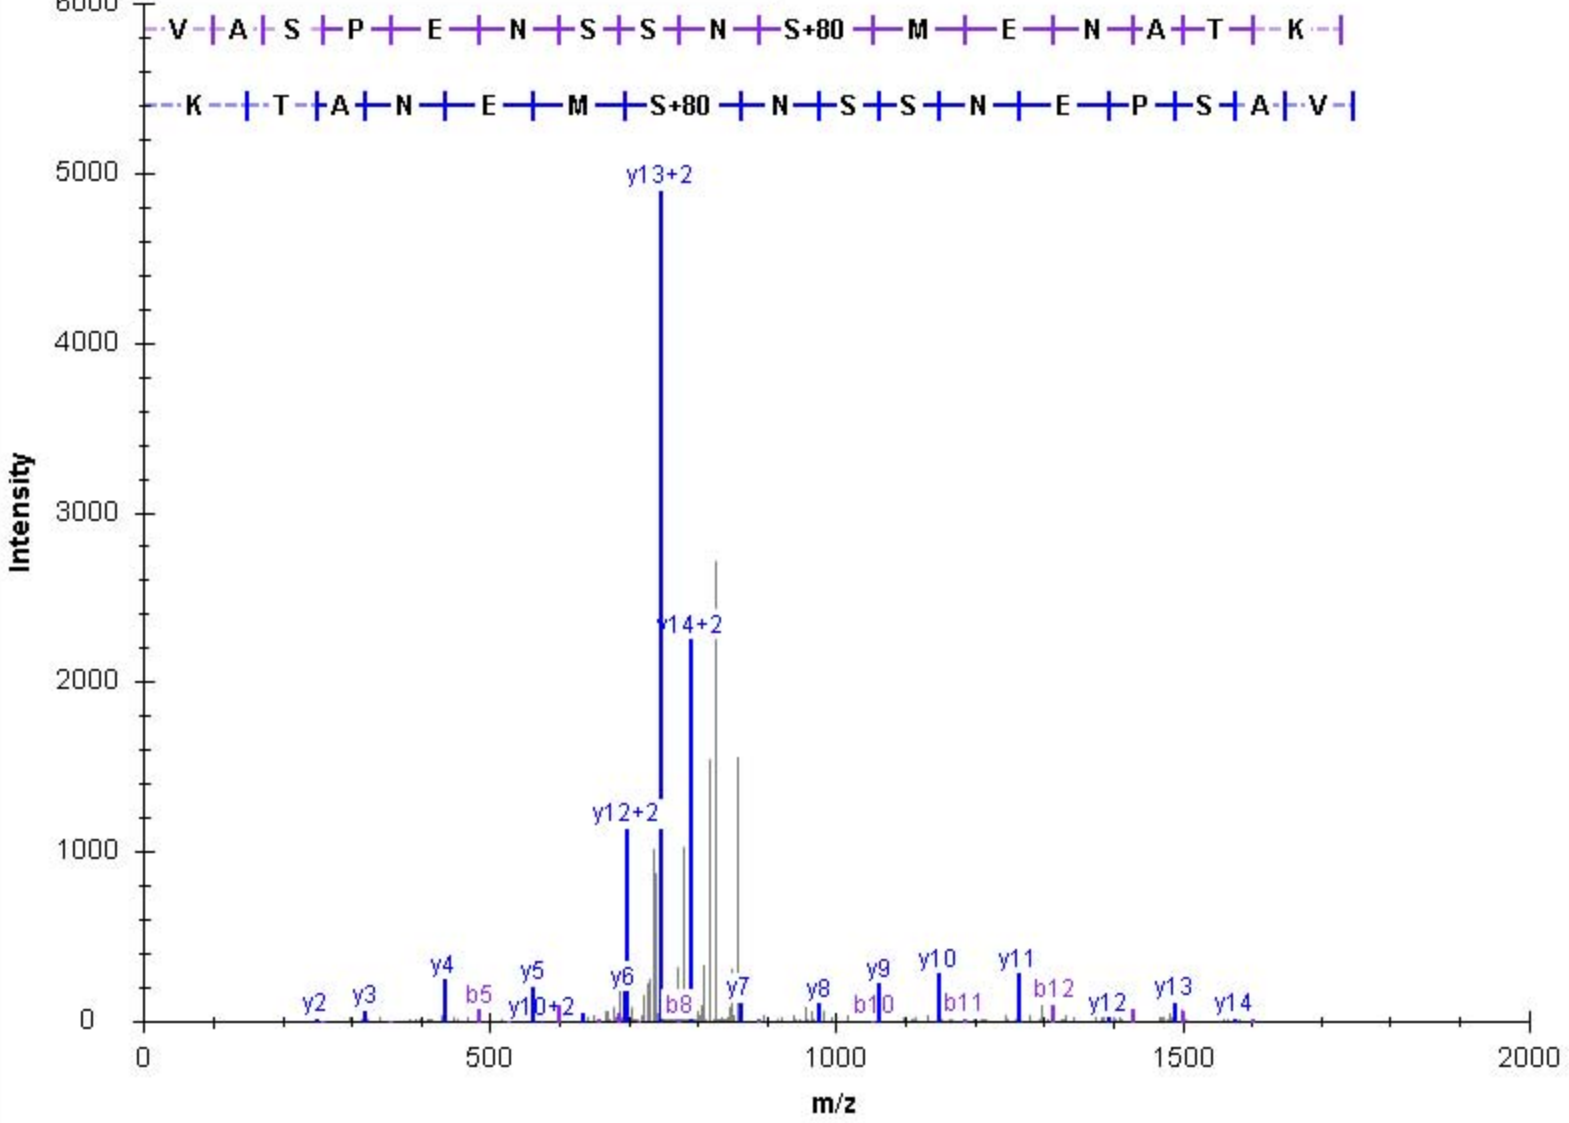

| b               | b(+2)    |    |   | y  | y(+2)           |                 |
|-----------------|----------|----|---|----|-----------------|-----------------|
| <b>72.044</b>   | 36.526   | 1  | A | 23 | 2490.188        | 1245.598        |
| 185.128         | 93.068   | 2  | I | 22 | 2419.151        | 1210.079        |
| 282.181         | 141.594  | 3  | P | 21 | 2306.067        | <b>1153.537</b> |
| 411.224         | 206.116  | 4  | E | 20 | 2209.015        | <b>1105.011</b> |
| 524.308         | 262.658  | 5  | L | 19 | 2079.972        | <b>1040.490</b> |
| 611.340         | 306.174  | 6  | S | 18 | <b>1966.888</b> | 983.948         |
| 726.367         | 363.687  | 7  | D | 17 | <b>1879.856</b> | 940.432         |
| 797.404         | 399.206  | 8  | A | 16 | <b>1764.829</b> | 882.918         |
| <b>896.472</b>  | 448.740  | 9  | V | 15 | <b>1693.792</b> | 847.400         |
| 1063.504        | 532.256  | 10 | S | 14 | <b>1594.723</b> | 797.865         |
| <b>1191.563</b> | 596.285  | 11 | Q | 13 | <b>1427.691</b> | 714.349         |
| <b>1338.631</b> | 669.819  | 12 | F | 12 | <b>1299.633</b> | 650.320         |
| <b>1452.674</b> | 726.841  | 13 | N | 11 | <b>1152.564</b> | 576.786         |
| 1539.706        | 770.357  | 14 | S | 10 | <b>1038.521</b> | 519.764         |
| 1626.738        | 813.873  | 15 | S | 9  | 951.489         | 476.248         |
| 1683.760        | 842.384  | 16 | G | 8  | <b>864.457</b>  | 432.732         |
| 1740.781        | 870.894  | 17 | G | 7  | <b>807.436</b>  | 404.222         |
| <b>1853.865</b> | 927.436  | 18 | L | 6  | <b>750.414</b>  | 375.711         |
| <b>1952.934</b> | 976.971  | 19 | V | 5  | <b>637.330</b>  | 319.169         |
| 2023.971        | 1012.489 | 20 | A | 4  | <b>538.262</b>  | 269.635         |
| 2153.013        | 1077.010 | 21 | E | 3  | <b>467.225</b>  | 234.116         |
| 2316.077        | 1158.542 | 22 | Y | 2  | 338.182         | 169.595         |
| 2472.178        | 1236.593 | 23 | R | 1  | 175.119         | 88.063          |

controllerType=0 controllerNumber=1 scan=18272

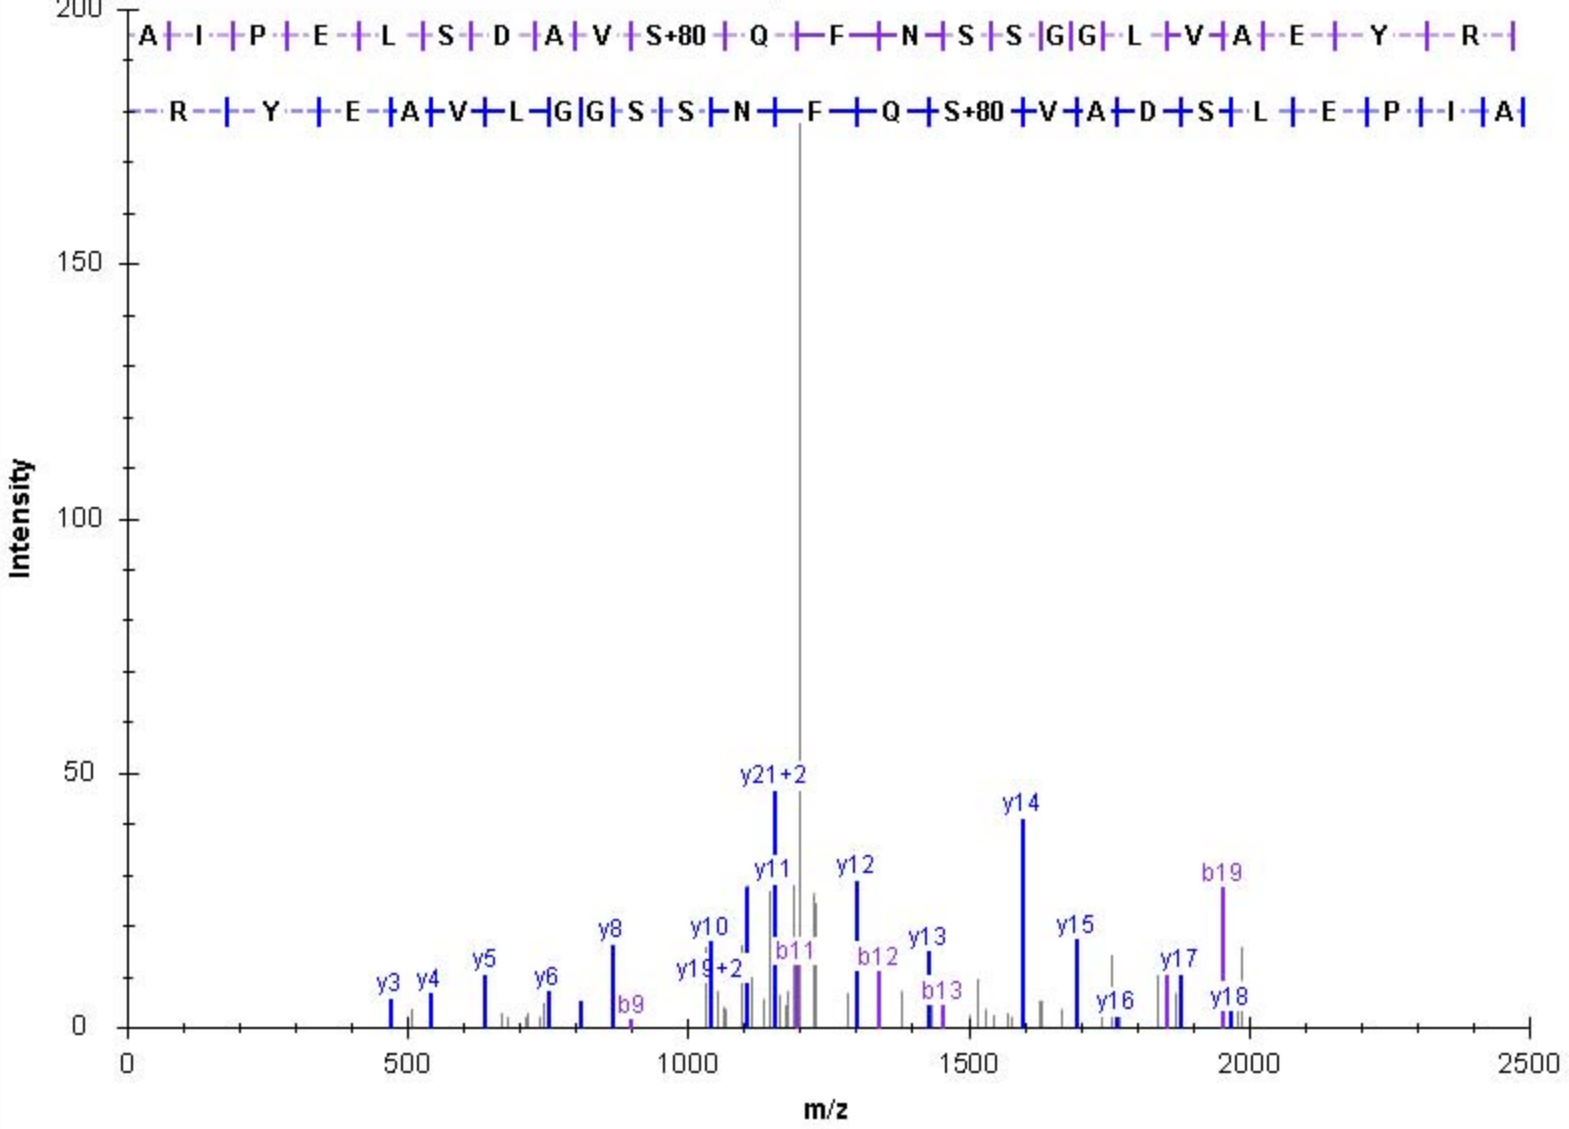

| b               | b(+2)    |    |   |    | y               | y(+2)           |
|-----------------|----------|----|---|----|-----------------|-----------------|
| <b>72.044</b>   | 36.526   | 1  | A | 23 | 2490.188        | 1245.598        |
| 185.128         | 93.068   | 2  | I | 22 | 2419.151        | 1210.079        |
| 282.181         | 141.594  | 3  | P | 21 | 2306.067        | <b>1153.537</b> |
| 411.224         | 206.116  | 4  | E | 20 | 2209.015        | <b>1105.011</b> |
| <b>524.308</b>  | 262.658  | 5  | L | 19 | 2079.972        | <b>1040.490</b> |
| <b>611.340</b>  | 306.174  | 6  | S | 18 | <b>1966.888</b> | <b>983.948</b>  |
| <b>726.367</b>  | 363.687  | 7  | D | 17 | <b>1879.856</b> | 940.432         |
| <b>797.404</b>  | 399.206  | 8  | A | 16 | <b>1764.829</b> | 882.918         |
| <b>896.472</b>  | 448.740  | 9  | V | 15 | <b>1693.792</b> | 847.400         |
| <b>983.504</b>  | 492.256  | 10 | S | 14 | <b>1594.723</b> | 797.865         |
| <b>1111.563</b> | 556.285  | 11 | Q | 13 | <b>1507.691</b> | 754.349         |
| <b>1258.631</b> | 629.819  | 12 | F | 12 | <b>1379.633</b> | 690.320         |
| <b>1372.674</b> | 686.841  | 13 | N | 11 | <b>1232.564</b> | 616.786         |
| 1539.706        | 770.357  | 14 | S | 10 | <b>1118.521</b> | 559.764         |
| 1626.738        | 813.873  | 15 | S | 9  | <b>951.489</b>  | 476.248         |
| <b>1683.760</b> | 842.384  | 16 | G | 8  | <b>864.457</b>  | 432.732         |
| 1740.781        | 870.894  | 17 | G | 7  | <b>807.436</b>  | 404.222         |
| <b>1853.865</b> | 927.436  | 18 | L | 6  | <b>750.414</b>  | 375.711         |
| <b>1952.934</b> | 976.971  | 19 | V | 5  | <b>637.330</b>  | 319.169         |
| 2023.971        | 1012.489 | 20 | A | 4  | <b>538.262</b>  | 269.635         |
| 2153.013        | 1077.010 | 21 | E | 3  | <b>467.225</b>  | 234.116         |
| 2316.077        | 1158.542 | 22 | Y | 2  | 338.182         | 169.595         |
| 2472.178        | 1236.593 | 23 | R | 1  | 175.119         | 88.063          |

controllerType=0 controllerNumber=1 scan=18122

A-I-P-E-L-S-D-A-V-S-Q-F-N-S+80-S-G-G-L-V-A-E-Y-R  
R-Y-E-A-V-L-G-G-S-S+80-N-F-Q-S-V-A-D-S-L-E-P-I-A

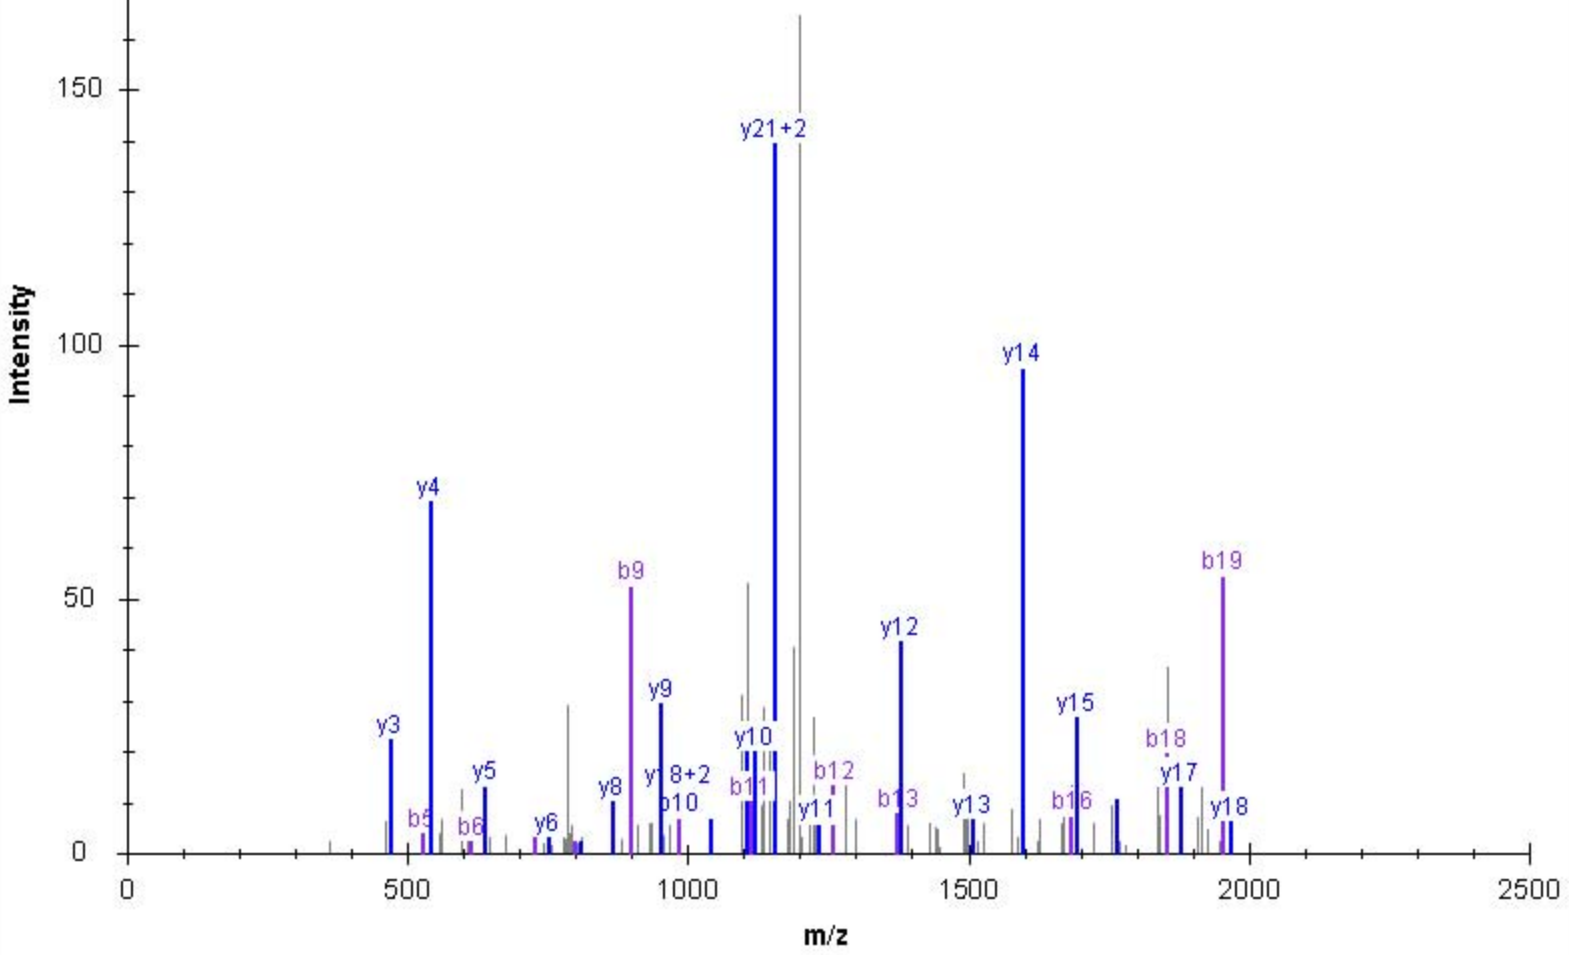

| b               | b(+2)          |    |   |    | y               | y(+2)          |
|-----------------|----------------|----|---|----|-----------------|----------------|
| <b>102.055</b>  | 51.531         | 1  | T | 16 | 1839.883        | 920.445        |
| 215.139         | 108.073        | 2  | L | 15 | 1738.835        | <b>869.921</b> |
| <b>328.223</b>  | 164.615        | 3  | L | 14 | 1625.751        | <b>813.379</b> |
| <b>442.266</b>  | 221.637        | 4  | N | 13 | <b>1512.667</b> | <b>756.837</b> |
| <b>529.298</b>  | 265.153        | 5  | S | 12 | <b>1398.624</b> | <b>699.816</b> |
| <b>660.339</b>  | <b>330.673</b> | 6  | M | 11 | <b>1311.592</b> | <b>656.300</b> |
| <b>788.397</b>  | 394.702        | 7  | Q | 10 | <b>1180.552</b> | 590.779        |
| <b>875.429</b>  | 438.218        | 8  | S | 9  | <b>1052.493</b> | 526.750        |
| <b>989.472</b>  | 495.240        | 9  | N | 8  | <b>965.461</b>  | 483.234        |
| <b>1060.509</b> | <b>530.758</b> | 10 | A | 7  | <b>851.418</b>  | <b>426.213</b> |
| <b>1157.562</b> | 579.285        | 11 | P | 6  | <b>780.381</b>  | 390.694        |
| <b>1256.630</b> | 628.819        | 12 | V | 5  | <b>683.328</b>  | 342.168        |
| <b>1437.678</b> | 719.343        | 13 | T | 4  | <b>584.260</b>  | 292.634        |
| <b>1534.731</b> | 767.869        | 14 | P | 3  | <b>403.212</b>  | 202.110        |
| <b>1665.771</b> | <b>833.389</b> | 15 | M | 2  | <b>306.159</b>  | 153.583        |
| 1821.872        | <b>911.440</b> | 16 | R | 1  | 175.119         | 88.063         |

controllerType=0 controllerNumber=1 scan=15569

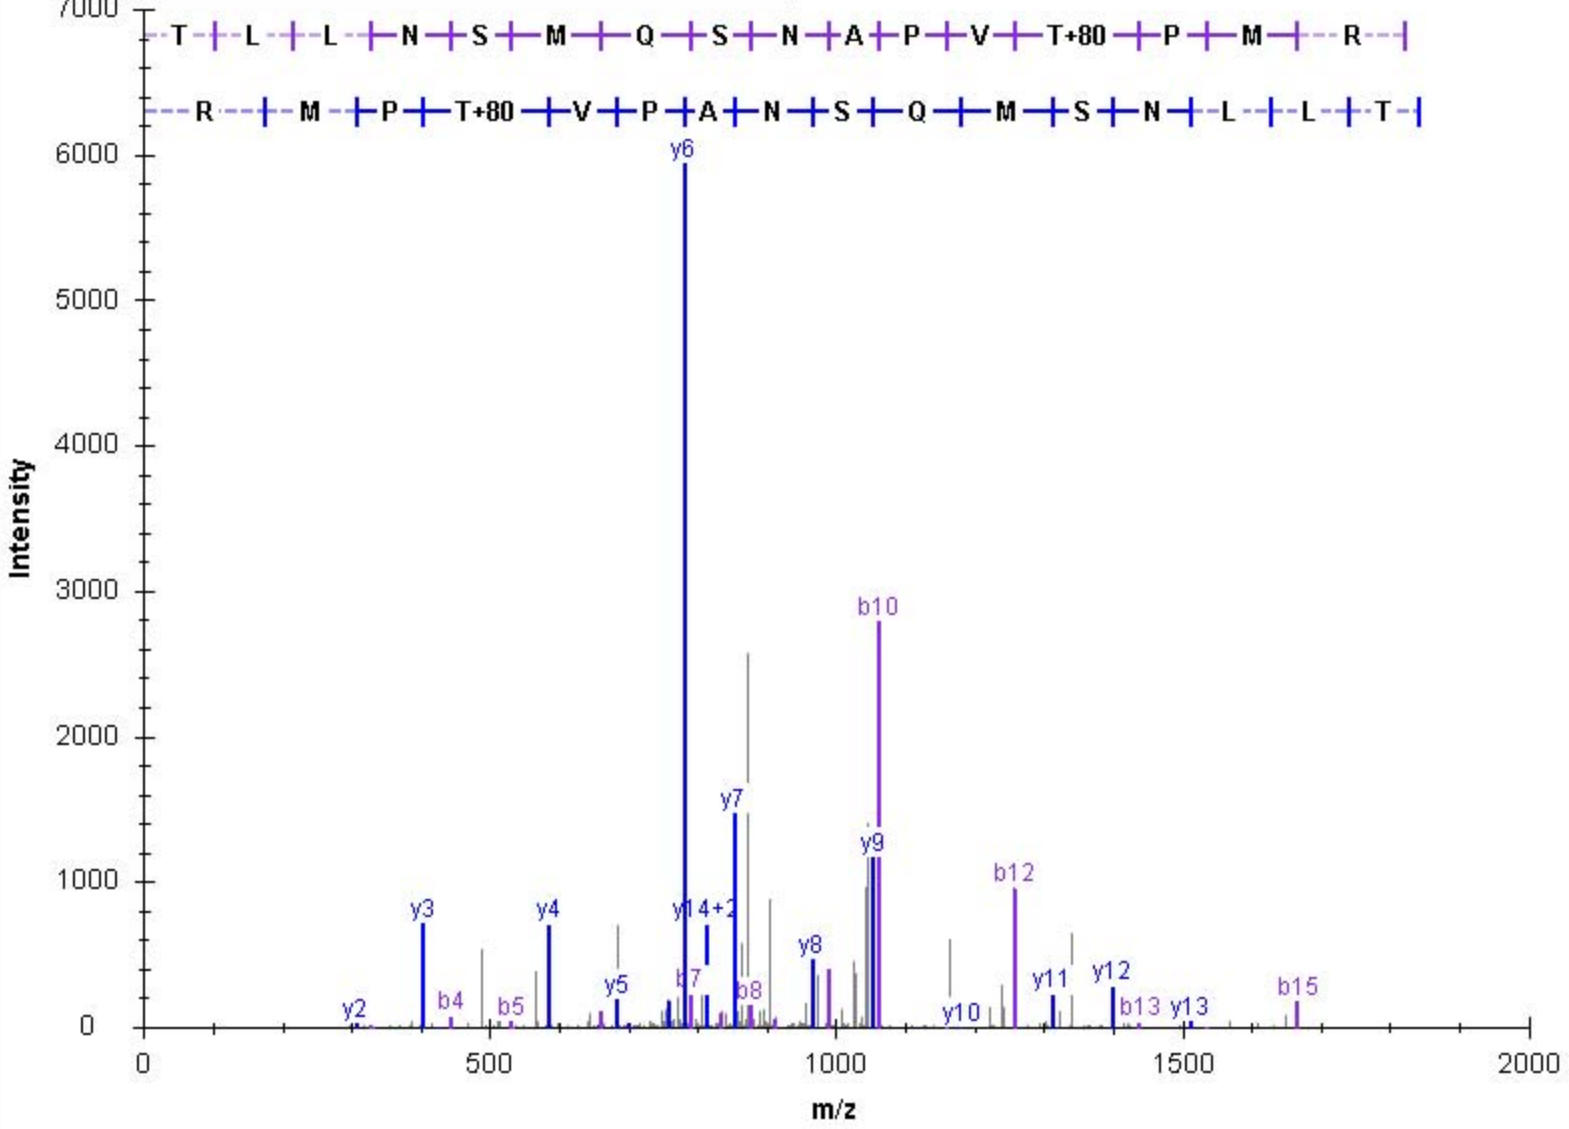



| b               | b(+2)          |    |   |    | y               | y(+2)          |
|-----------------|----------------|----|---|----|-----------------|----------------|
| 114.091         | 57.549         | 1  | I | 15 | 1870.765        | 935.886        |
| 242.150         | 121.579        | 2  | Q | 14 | 1757.681        | <b>879.344</b> |
| 339.203         | 170.105        | 3  | P | 13 | 1629.622        | <b>815.315</b> |
| 506.235         | 253.621        | 4  | S | 12 | <b>1532.569</b> | <b>766.788</b> |
| <b>635.277</b>  | <b>318.142</b> | 5  | E | 11 | 1365.537        | 683.272        |
| <b>750.304</b>  | 375.656        | 6  | D | 10 | <b>1236.495</b> | <b>618.751</b> |
| <b>879.347</b>  | 440.177        | 7  | E | 9  | <b>1121.468</b> | 561.237        |
| <b>1007.442</b> | 504.225        | 8  | K | 8  | <b>992.425</b>  | <b>496.716</b> |
| <b>1136.484</b> | 568.746        | 9  | E | 7  | <b>864.330</b>  | 432.669        |
| 1207.522        | 604.264        | 10 | A | 6  | <b>735.288</b>  | 368.147        |
| <b>1336.564</b> | <b>668.786</b> | 11 | E | 5  | 664.250         | 332.629        |
| 1407.601        | 704.304        | 12 | A | 4  | <b>535.208</b>  | 268.108        |
| <b>1536.644</b> | 768.826        | 13 | E | 3  | <b>464.171</b>  | 232.589        |
| 1696.653        | 848.830        | 14 | C | 2  | <b>335.128</b>  | 168.068        |
| 1852.754        | <b>926.881</b> | 15 | R | 1  | 175.119         | 88.063         |

controllerType=0 controllerNumber=1 scan=9647

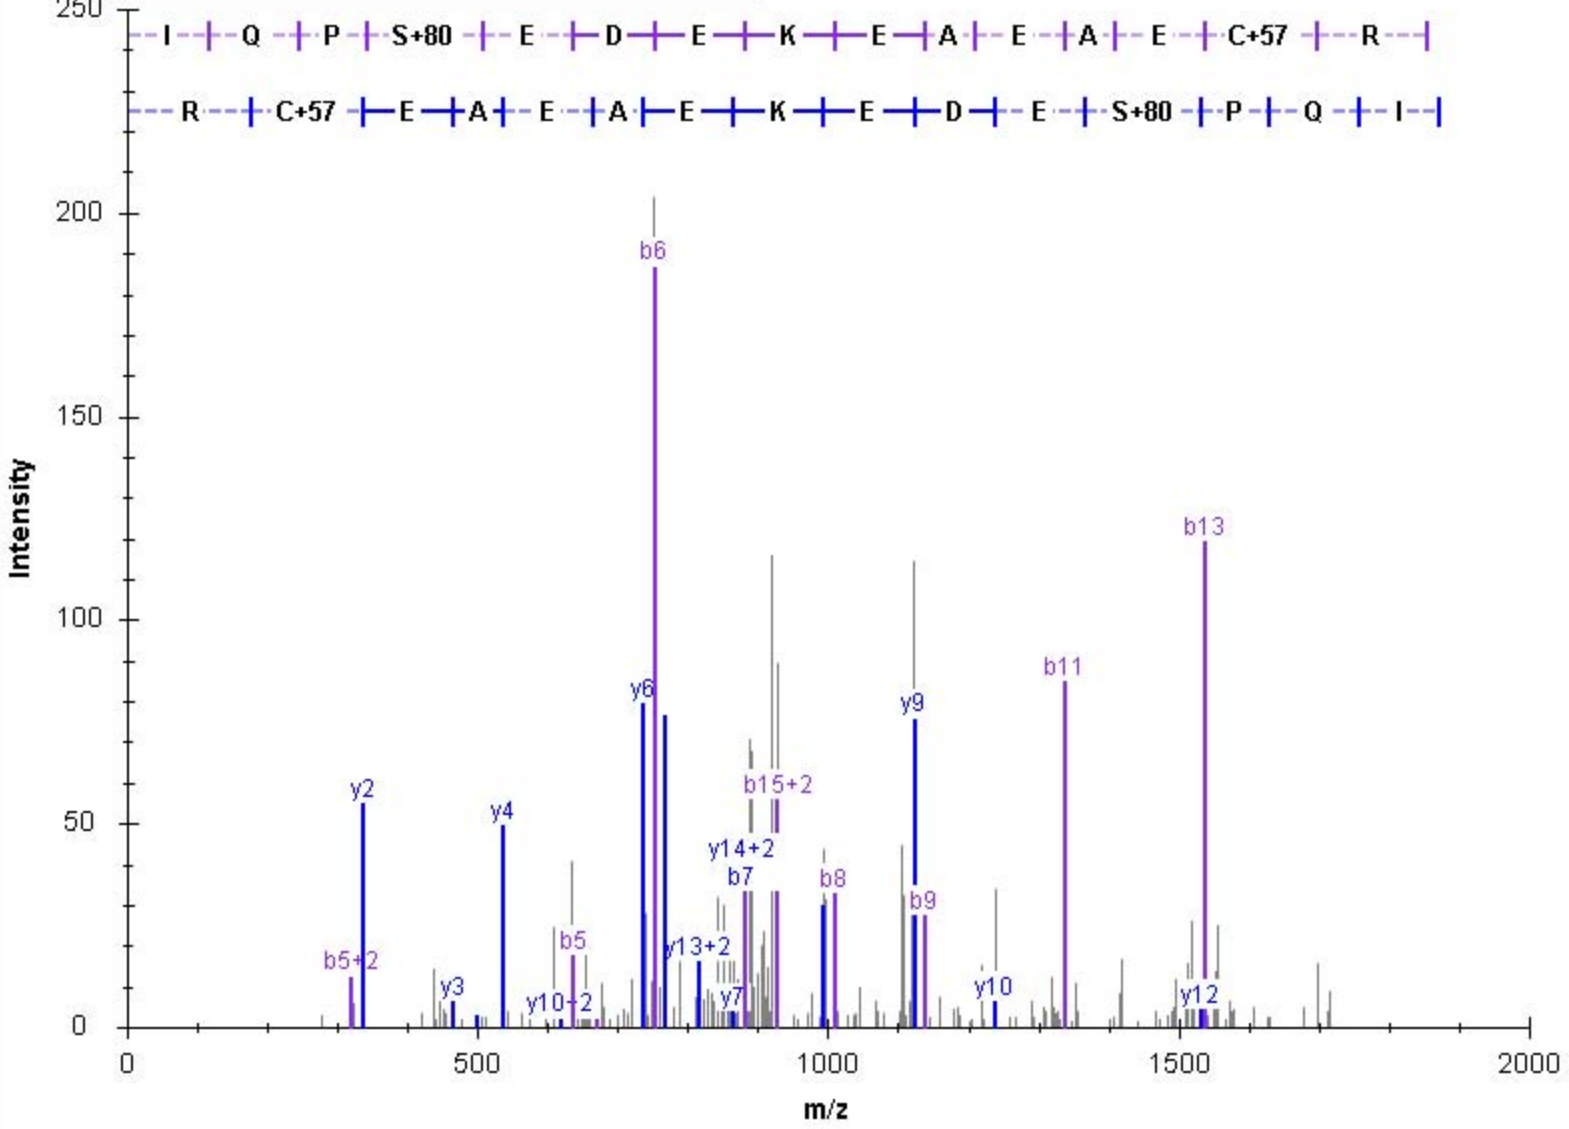

| b        | b(+2)   |    |   |    | y        | y(+2)   |
|----------|---------|----|---|----|----------|---------|
| 168.039  | 84.523  | 1  | S | 16 | 1993.868 | 997.438 |
| 281.123  | 141.065 | 2  | L | 15 | 1826.836 | 913.922 |
| 409.182  | 205.095 | 3  | Q | 14 | 1713.752 | 857.380 |
| 522.266  | 261.637 | 4  | L | 13 | 1585.694 | 793.351 |
| 689.298  | 345.153 | 5  | S | 12 | 1472.610 | 736.808 |
| 786.351  | 393.679 | 6  | P | 11 | 1305.578 | 653.292 |
| 946.360  | 473.684 | 7  | C | 10 | 1208.525 | 604.766 |
| 1059.444 | 530.226 | 8  | L | 9  | 1048.516 | 524.761 |
| 1160.492 | 580.750 | 9  | T | 8  | 935.432  | 468.219 |
| 1275.519 | 638.263 | 10 | D | 7  | 834.384  | 417.696 |
| 1390.546 | 695.776 | 11 | D | 6  | 719.357  | 360.182 |
| 1519.588 | 760.298 | 12 | E | 5  | 604.330  | 302.669 |
| 1647.647 | 824.327 | 13 | Q | 4  | 475.287  | 238.147 |
| 1760.731 | 880.869 | 14 | L | 3  | 347.229  | 174.118 |
| 1847.763 | 924.385 | 15 | S | 2  | 234.145  | 117.576 |
| 1975.858 | 988.433 | 16 | K | 1  | 147.113  | 74.060  |

controllerType=0 controllerNumber=1 scan=9895

Intensity (10<sup>3</sup>)

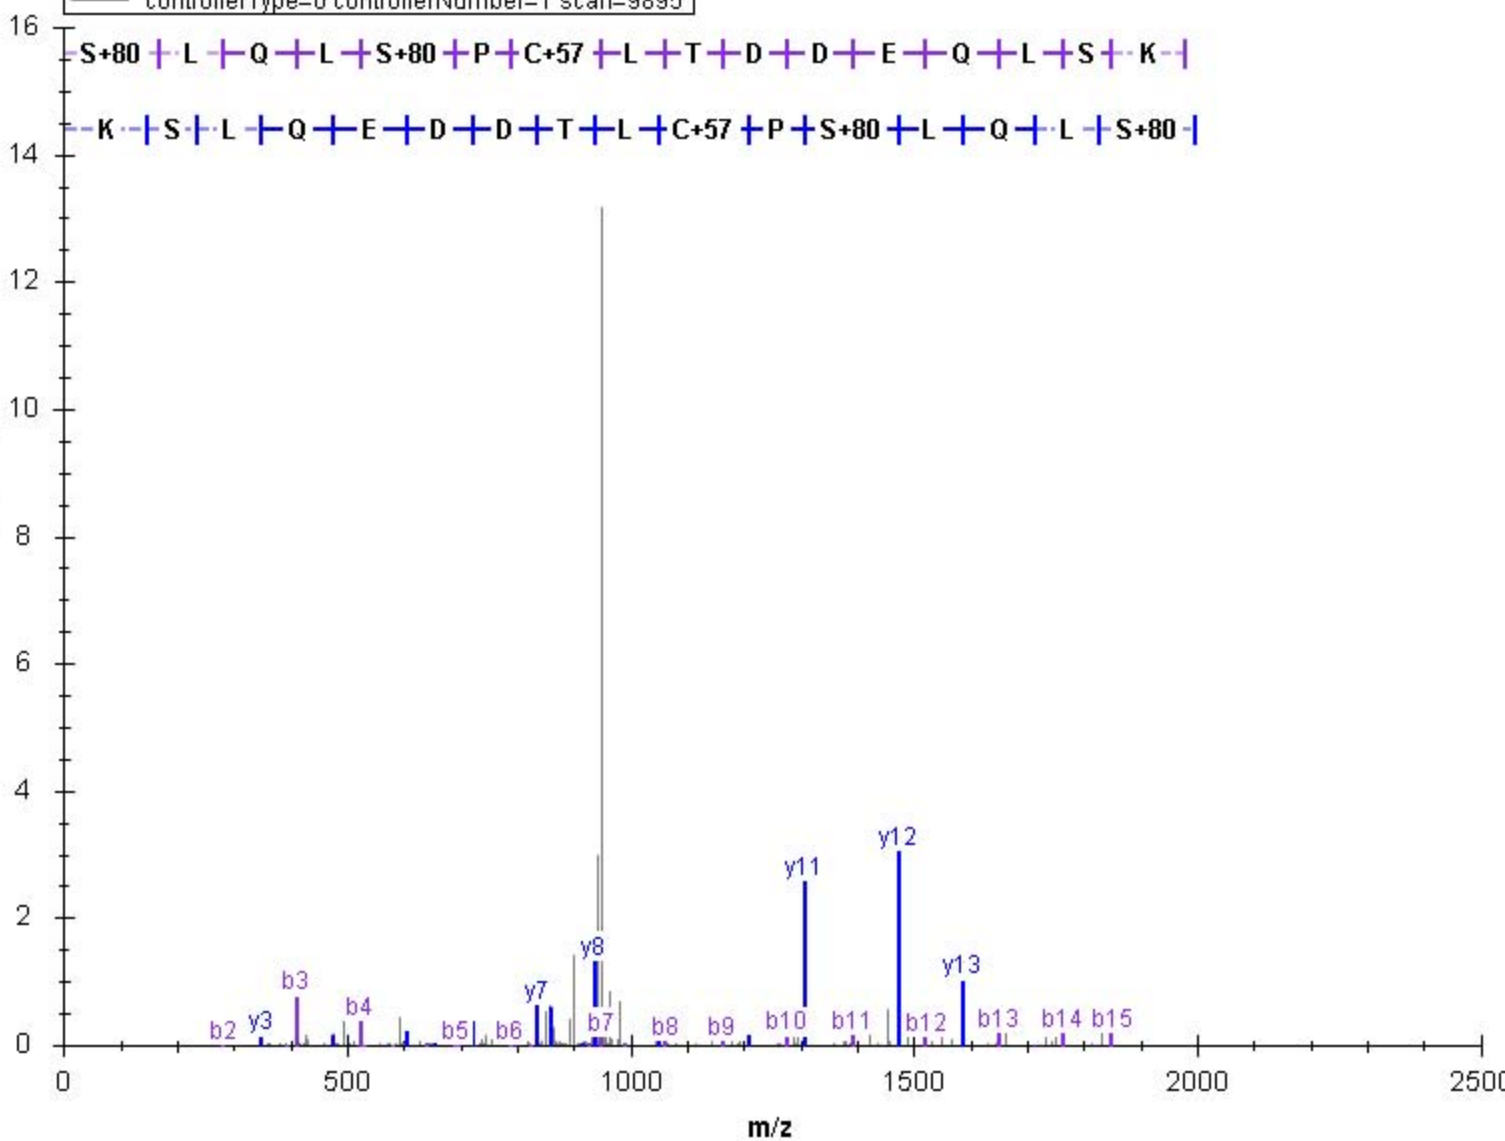

| b               | b(+2)          |    |   |    | y               | y(+2)          |
|-----------------|----------------|----|---|----|-----------------|----------------|
| 168.039         | 84.523         | 1  | S | 16 | 1913.868        | 957.438        |
| <b>281.123</b>  | 141.065        | 2  | L | 15 | 1746.836        | <b>873.922</b> |
| <b>409.182</b>  | 205.095        | 3  | Q | 14 | 1633.752        | <b>817.380</b> |
| <b>522.266</b>  | 261.637        | 4  | L | 13 | <b>1505.694</b> | 753.351        |
| <b>609.298</b>  | 305.153        | 5  | S | 12 | <b>1392.610</b> | <b>696.808</b> |
| 706.351         | 353.679        | 6  | P | 11 | <b>1305.578</b> | 653.292        |
| 866.360         | 433.684        | 7  | C | 10 | <b>1208.525</b> | <b>604.766</b> |
| <b>979.444</b>  | 490.226        | 8  | L | 9  | <b>1048.516</b> | 524.761        |
| <b>1080.492</b> | 540.750        | 9  | T | 8  | <b>935.432</b>  | 468.219        |
| <b>1195.519</b> | 598.263        | 10 | D | 7  | <b>834.384</b>  | 417.696        |
| <b>1310.546</b> | 655.776        | 11 | D | 6  | <b>719.357</b>  | 360.182        |
| <b>1439.588</b> | 720.298        | 12 | E | 5  | <b>604.330</b>  | 302.669        |
| <b>1567.647</b> | 784.327        | 13 | Q | 4  | <b>475.287</b>  | 238.147        |
| <b>1680.731</b> | <b>840.869</b> | 14 | L | 3  | 347.229         | 174.118        |
| <b>1767.763</b> | 884.385        | 15 | S | 2  | 234.145         | 117.576        |
| 1895.858        | 948.433        | 16 | K | 1  | 147.113         | 74.060         |

controllerType=0 controllerNumber=1 scan=13954

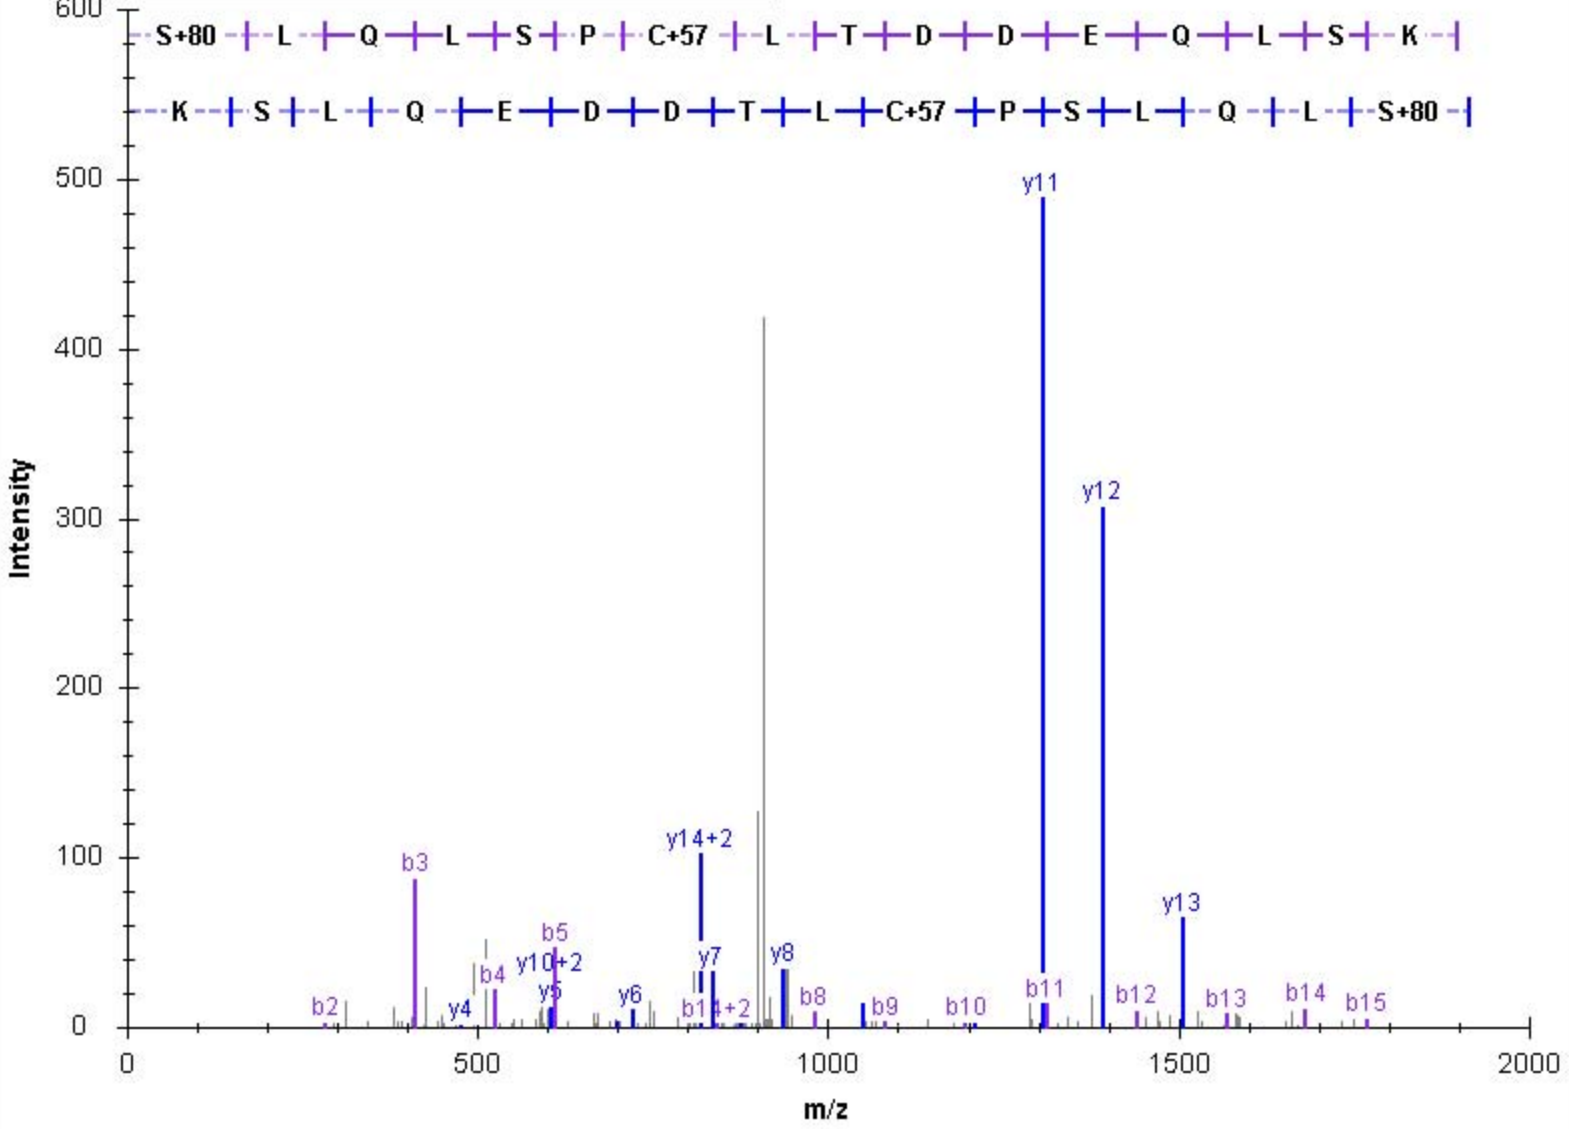

| b               | b(+2)          |    |   |    | y               | y(+2)          |
|-----------------|----------------|----|---|----|-----------------|----------------|
| <b>88.039</b>   | 44.523         | 1  | S | 16 | 1993.868        | 997.438        |
| 201.123         | 101.065        | 2  | L | 15 | 1906.836        | <b>953.922</b> |
| <b>329.182</b>  | 165.095        | 3  | Q | 14 | <b>1793.752</b> | <b>897.380</b> |
| <b>442.266</b>  | 221.637        | 4  | L | 13 | <b>1665.694</b> | <b>833.351</b> |
| <b>609.298</b>  | 305.153        | 5  | S | 12 | <b>1552.610</b> | <b>776.808</b> |
| 706.351         | <b>353.679</b> | 6  | P | 11 | <b>1385.578</b> | <b>693.292</b> |
| <b>866.360</b>  | 433.684        | 7  | C | 10 | <b>1288.525</b> | <b>644.766</b> |
| <b>979.444</b>  | 490.226        | 8  | L | 9  | <b>1128.516</b> | 564.761        |
| <b>1160.492</b> | <b>580.750</b> | 9  | T | 8  | <b>1015.432</b> | <b>508.219</b> |
| 1275.519        | 638.263        | 10 | D | 7  | <b>834.384</b>  | <b>417.696</b> |
| <b>1390.546</b> | 695.776        | 11 | D | 6  | <b>719.357</b>  | 360.182        |
| <b>1519.588</b> | 760.298        | 12 | E | 5  | <b>604.330</b>  | 302.669        |
| <b>1647.647</b> | 824.327        | 13 | Q | 4  | <b>475.287</b>  | 238.147        |
| <b>1760.731</b> | 880.869        | 14 | L | 3  | <b>347.229</b>  | 174.118        |
| <b>1847.763</b> | <b>924.385</b> | 15 | S | 2  | 234.145         | 117.576        |
| 1975.858        | <b>988.433</b> | 16 | K | 1  | 147.113         | 74.060         |

controllerType=0 controllerNumber=1 scan=9756

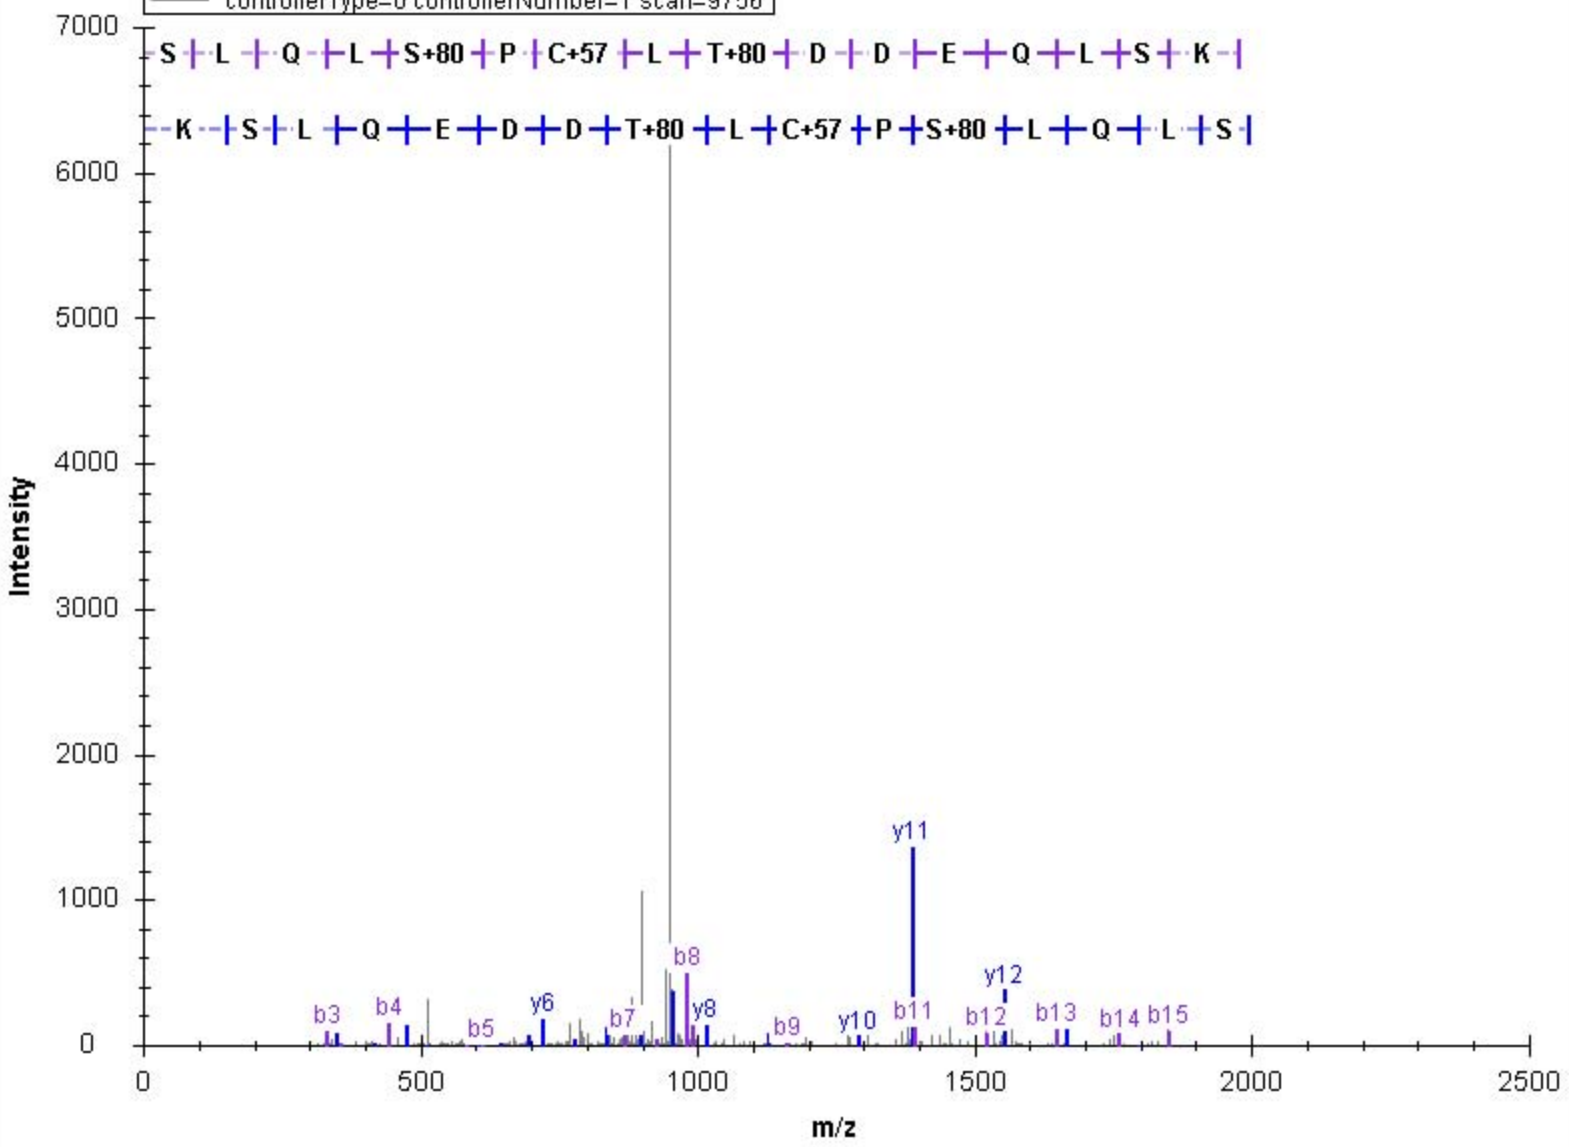



| b               | b(+2)          |    |   |    | y               | y(+2)          |
|-----------------|----------------|----|---|----|-----------------|----------------|
| 88.039          | 44.523         | 1  | S | 16 | 1913.868        | 957.438        |
| 201.123         | 101.065        | 2  | L | 15 | 1826.836        | <b>913.922</b> |
| <b>329.182</b>  | 165.095        | 3  | Q | 14 | 1713.752        | <b>857.380</b> |
| <b>442.266</b>  | 221.637        | 4  | L | 13 | <b>1585.694</b> | <b>793.351</b> |
| <b>609.298</b>  | <b>305.153</b> | 5  | S | 12 | <b>1472.610</b> | 736.808        |
| 706.351         | 353.679        | 6  | P | 11 | <b>1305.578</b> | 653.292        |
| <b>866.360</b>  | 433.684        | 7  | C | 10 | <b>1208.525</b> | <b>604.766</b> |
| <b>979.444</b>  | 490.226        | 8  | L | 9  | <b>1048.516</b> | 524.761        |
| 1080.492        | 540.750        | 9  | T | 8  | <b>935.432</b>  | 468.219        |
| <b>1195.519</b> | <b>598.263</b> | 10 | D | 7  | <b>834.384</b>  | 417.696        |
| <b>1310.546</b> | <b>655.776</b> | 11 | D | 6  | <b>719.357</b>  | <b>360.182</b> |
| 1439.588        | 720.298        | 12 | E | 5  | <b>604.330</b>  | 302.669        |
| <b>1567.647</b> | <b>784.327</b> | 13 | Q | 4  | <b>475.287</b>  | 238.147        |
| <b>1680.731</b> | <b>840.869</b> | 14 | L | 3  | <b>347.229</b>  | 174.118        |
| <b>1767.763</b> | <b>884.385</b> | 15 | S | 2  | 234.145         | 117.576        |
| 1895.858        | <b>948.433</b> | 16 | K | 1  | 147.113         | 74.060         |

controllerType=0 controllerNumber=1 scan=9297

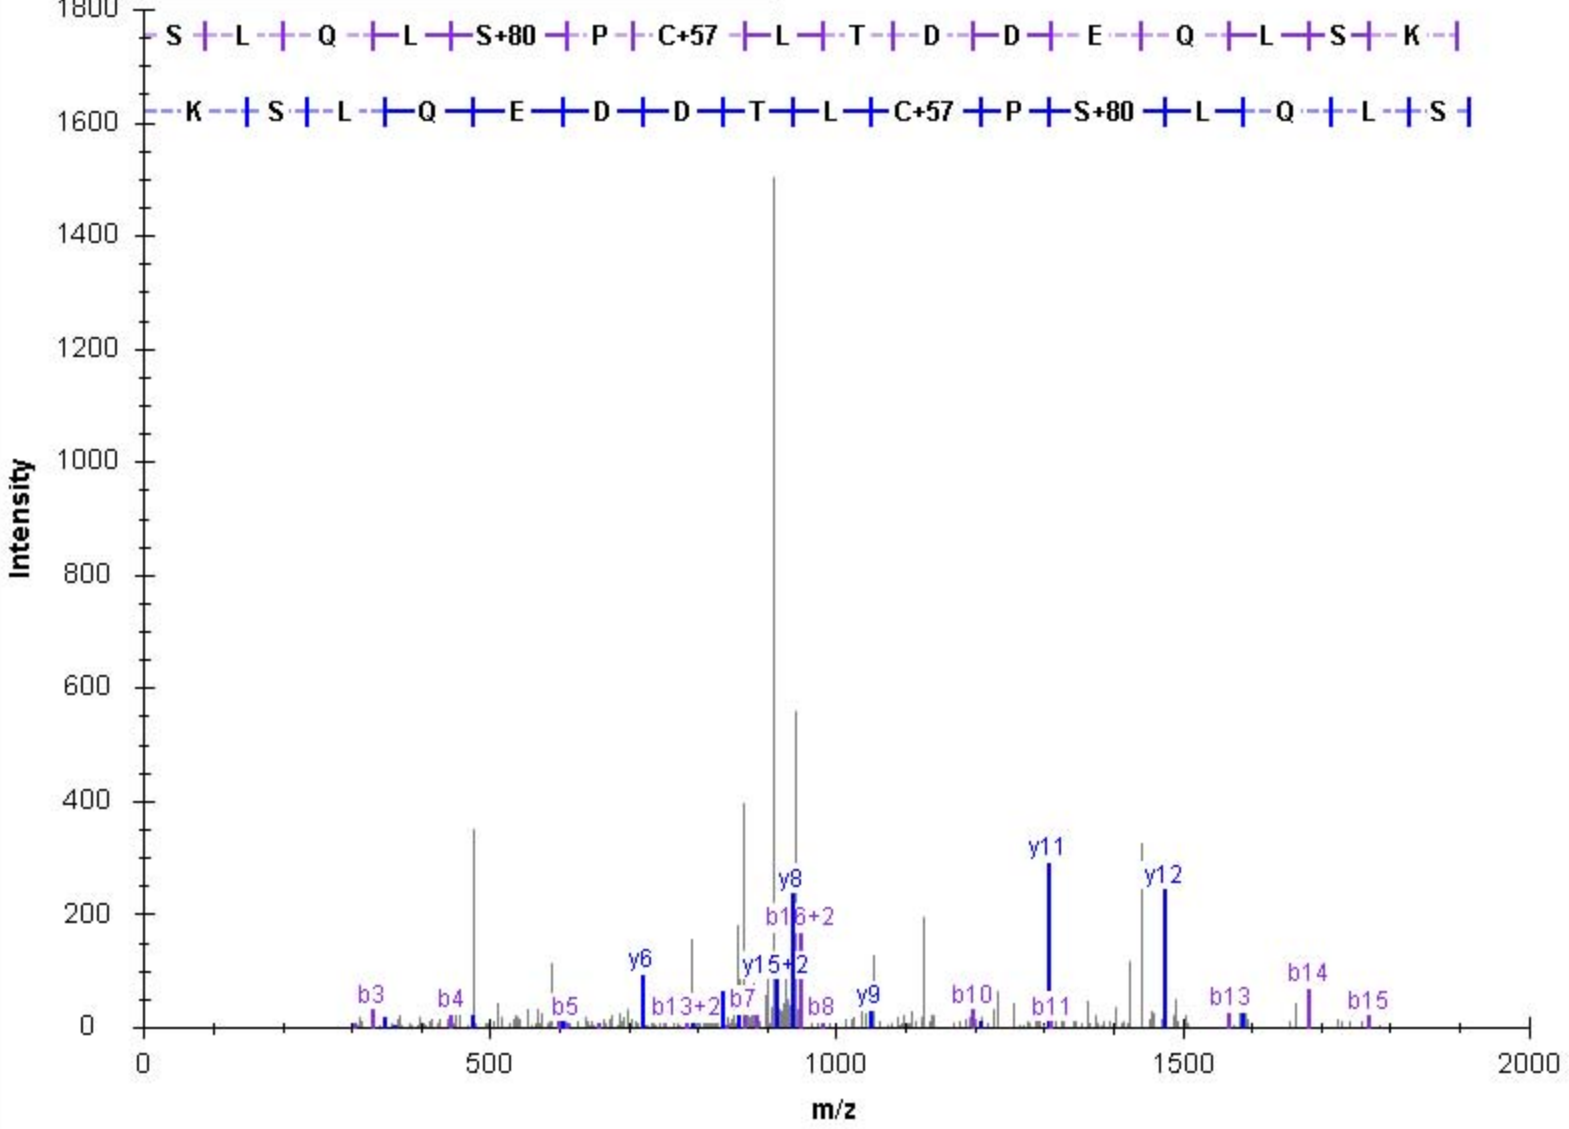

| b               | b(+2)          |    |   |    | y               | y(+2)          |
|-----------------|----------------|----|---|----|-----------------|----------------|
| <b>88.039</b>   | 44.523         | 1  | S | 16 | 1913.868        | 957.438        |
| 201.123         | 101.065        | 2  | L | 15 | 1826.836        | 913.922        |
| <b>329.182</b>  | 165.095        | 3  | Q | 14 | 1713.752        | <b>857.380</b> |
| <b>442.266</b>  | 221.637        | 4  | L | 13 | <b>1585.694</b> | <b>793.351</b> |
| <b>529.298</b>  | 265.153        | 5  | S | 12 | <b>1472.610</b> | <b>736.808</b> |
| 626.351         | 313.679        | 6  | P | 11 | <b>1385.578</b> | <b>693.292</b> |
| <b>786.360</b>  | 393.684        | 7  | C | 10 | <b>1288.525</b> | 644.766        |
| <b>899.444</b>  | 450.226        | 8  | L | 9  | <b>1128.516</b> | <b>564.761</b> |
| <b>1080.492</b> | 540.750        | 9  | T | 8  | <b>1015.432</b> | 508.219        |
| <b>1195.519</b> | 598.263        | 10 | D | 7  | <b>834.384</b>  | <b>417.696</b> |
| <b>1310.546</b> | 655.776        | 11 | D | 6  | <b>719.357</b>  | 360.182        |
| <b>1439.588</b> | <b>720.298</b> | 12 | E | 5  | <b>604.330</b>  | 302.669        |
| <b>1567.647</b> | <b>784.327</b> | 13 | Q | 4  | <b>475.287</b>  | 238.147        |
| <b>1680.731</b> | 840.869        | 14 | L | 3  | <b>347.229</b>  | 174.118        |
| <b>1767.763</b> | <b>884.385</b> | 15 | S | 2  | 234.145         | 117.576        |
| 1895.858        | <b>948.433</b> | 16 | K | 1  | 147.113         | 74.060         |

controllerType=0 controllerNumber=1 scan=11468

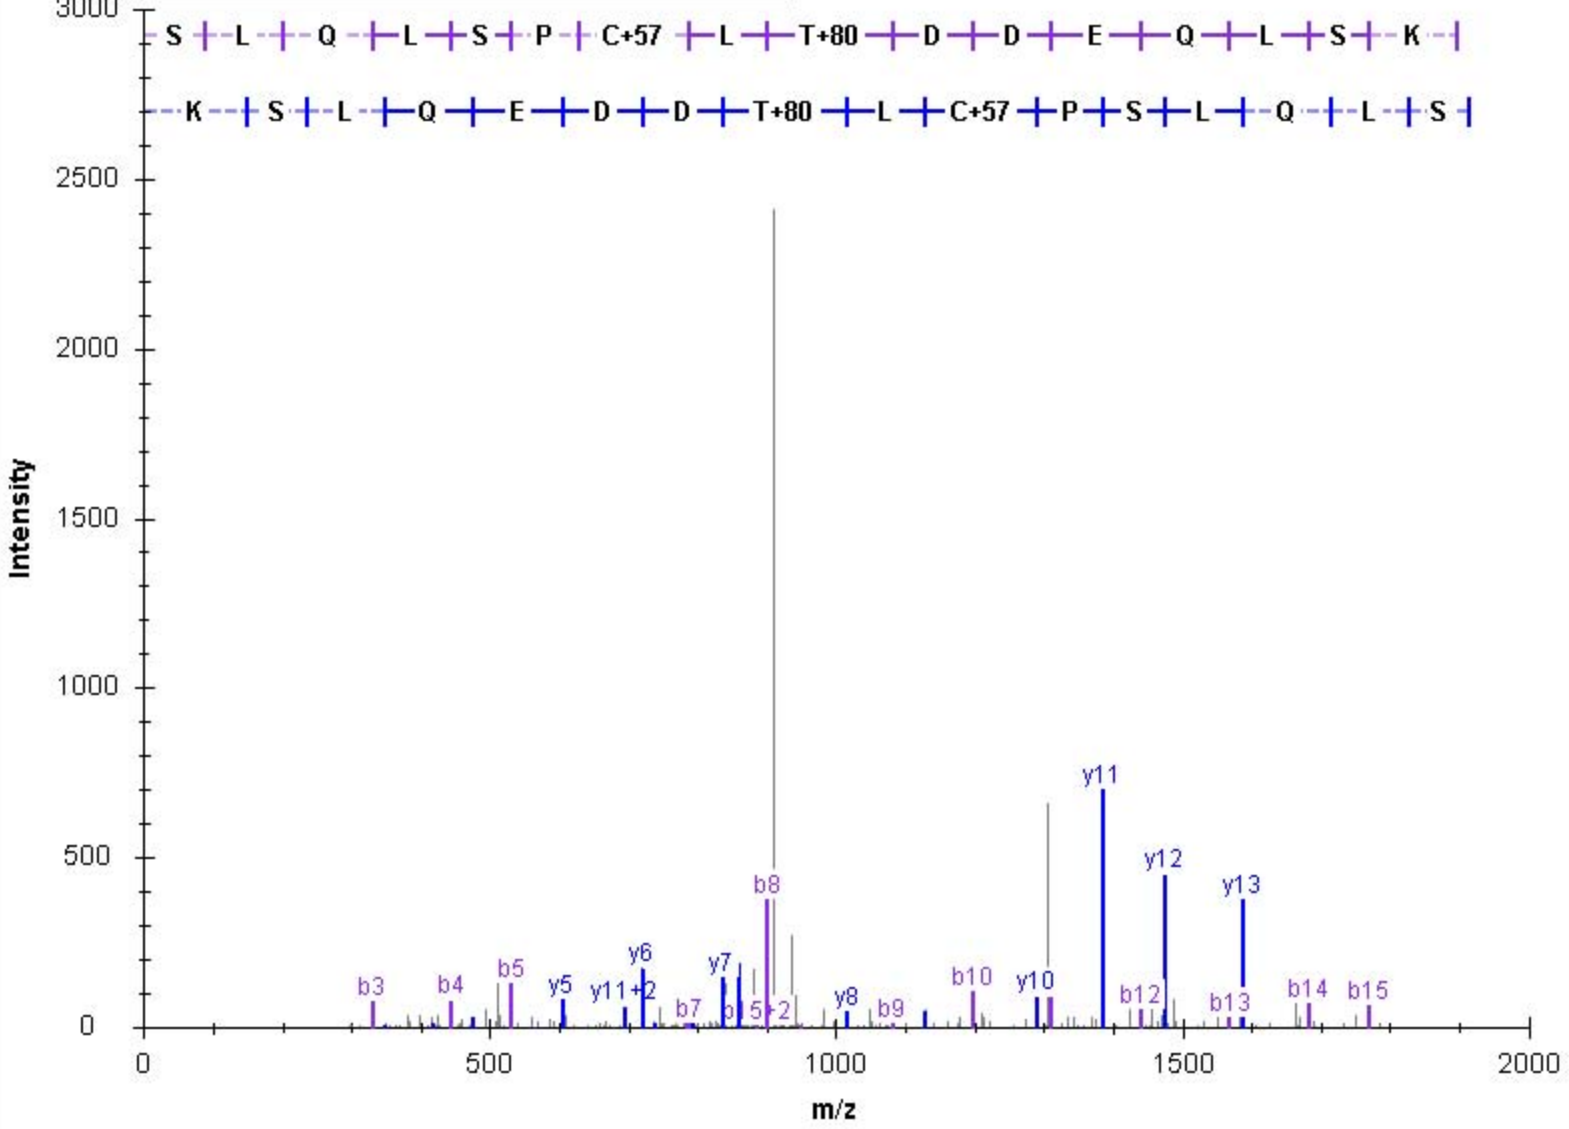

| b               | b(+2)           |    |   | y  | y(+2)           |                 |
|-----------------|-----------------|----|---|----|-----------------|-----------------|
| <b>130.050</b>  | 65.529          | 1  | E | 30 | 3223.451        | 1612.229        |
| 243.134         | 122.071         | 2  | L | 29 | 3094.409        | 1547.708        |
| 330.166         | 165.587         | 3  | S | 28 | 2981.325        | <b>1491.166</b> |
| 458.225         | 229.616         | 4  | Q | 27 | 2894.293        | 1447.650        |
| 545.257         | 273.132         | 5  | S | 26 | 2766.234        | <b>1383.621</b> |
| 632.289         | 316.648         | 6  | S | 25 | 2679.202        | <b>1340.105</b> |
| <b>747.316</b>  | 374.161         | 7  | D | 24 | 2592.170        | <b>1296.589</b> |
| <b>834.348</b>  | <b>417.677</b>  | 8  | S | 23 | 2477.143        | <b>1239.075</b> |
| <b>921.380</b>  | 461.193         | 9  | S | 22 | 2390.111        | <b>1195.559</b> |
| <b>1049.438</b> | 525.223         | 10 | Q | 21 | 2303.079        | <b>1152.043</b> |
| <b>1186.497</b> | 593.752         | 11 | H | 20 | 2175.020        | 1088.014        |
| <b>1314.556</b> | 657.781         | 12 | Q | 19 | 2037.961        | 1019.484        |
| <b>1451.615</b> | <b>726.311</b>  | 13 | H | 18 | 1909.903        | <b>955.455</b>  |
| 1566.642        | <b>783.824</b>  | 14 | D | 17 | <b>1772.844</b> | <b>886.926</b>  |
| 1653.674        | <b>827.340</b>  | 15 | S | 16 | <b>1657.817</b> | 829.412         |
| 1800.742        | <b>900.875</b>  | 16 | F | 15 | <b>1570.785</b> | <b>785.896</b>  |
| <b>1913.826</b> | <b>957.417</b>  | 17 | L | 14 | <b>1423.717</b> | <b>712.362</b>  |
| 2010.879        | <b>1005.943</b> | 18 | P | 13 | <b>1310.632</b> | <b>655.820</b>  |
| 2081.916        | <b>1041.462</b> | 19 | A | 12 | <b>1213.580</b> | <b>607.293</b>  |
| 2195.959        | <b>1098.483</b> | 20 | N | 11 | <b>1142.543</b> | 571.775         |
| 2282.991        | <b>1141.999</b> | 21 | S | 10 | <b>1028.500</b> | 514.753         |
| 2450.023        | <b>1225.515</b> | 22 | S | 9  | <b>941.468</b>  | 471.237         |
| 2547.076        | <b>1274.041</b> | 23 | P | 8  | <b>774.436</b>  | 387.721         |
| 2660.160        | <b>1330.583</b> | 24 | L | 7  | <b>677.383</b>  | 339.195         |
| 2731.197        | <b>1366.102</b> | 25 | A | 6  | <b>564.299</b>  | 282.653         |
| 2802.234        | <b>1401.621</b> | 26 | A | 5  | <b>493.262</b>  | 247.134         |
| 2889.266        | 1445.137        | 27 | S | 4  | <b>422.225</b>  | 211.616         |
| 2976.298        | <b>1488.653</b> | 28 | S | 3  | 335.193         | 168.100         |
| 3077.346        | <b>1539.176</b> | 29 | T | 2  | 248.160         | 124.584         |
| 3205.441        | 1603.224        | 30 | K | 1  | 147.113         | 74.060          |

controllerType=0 controllerNumber=1 scan=10411

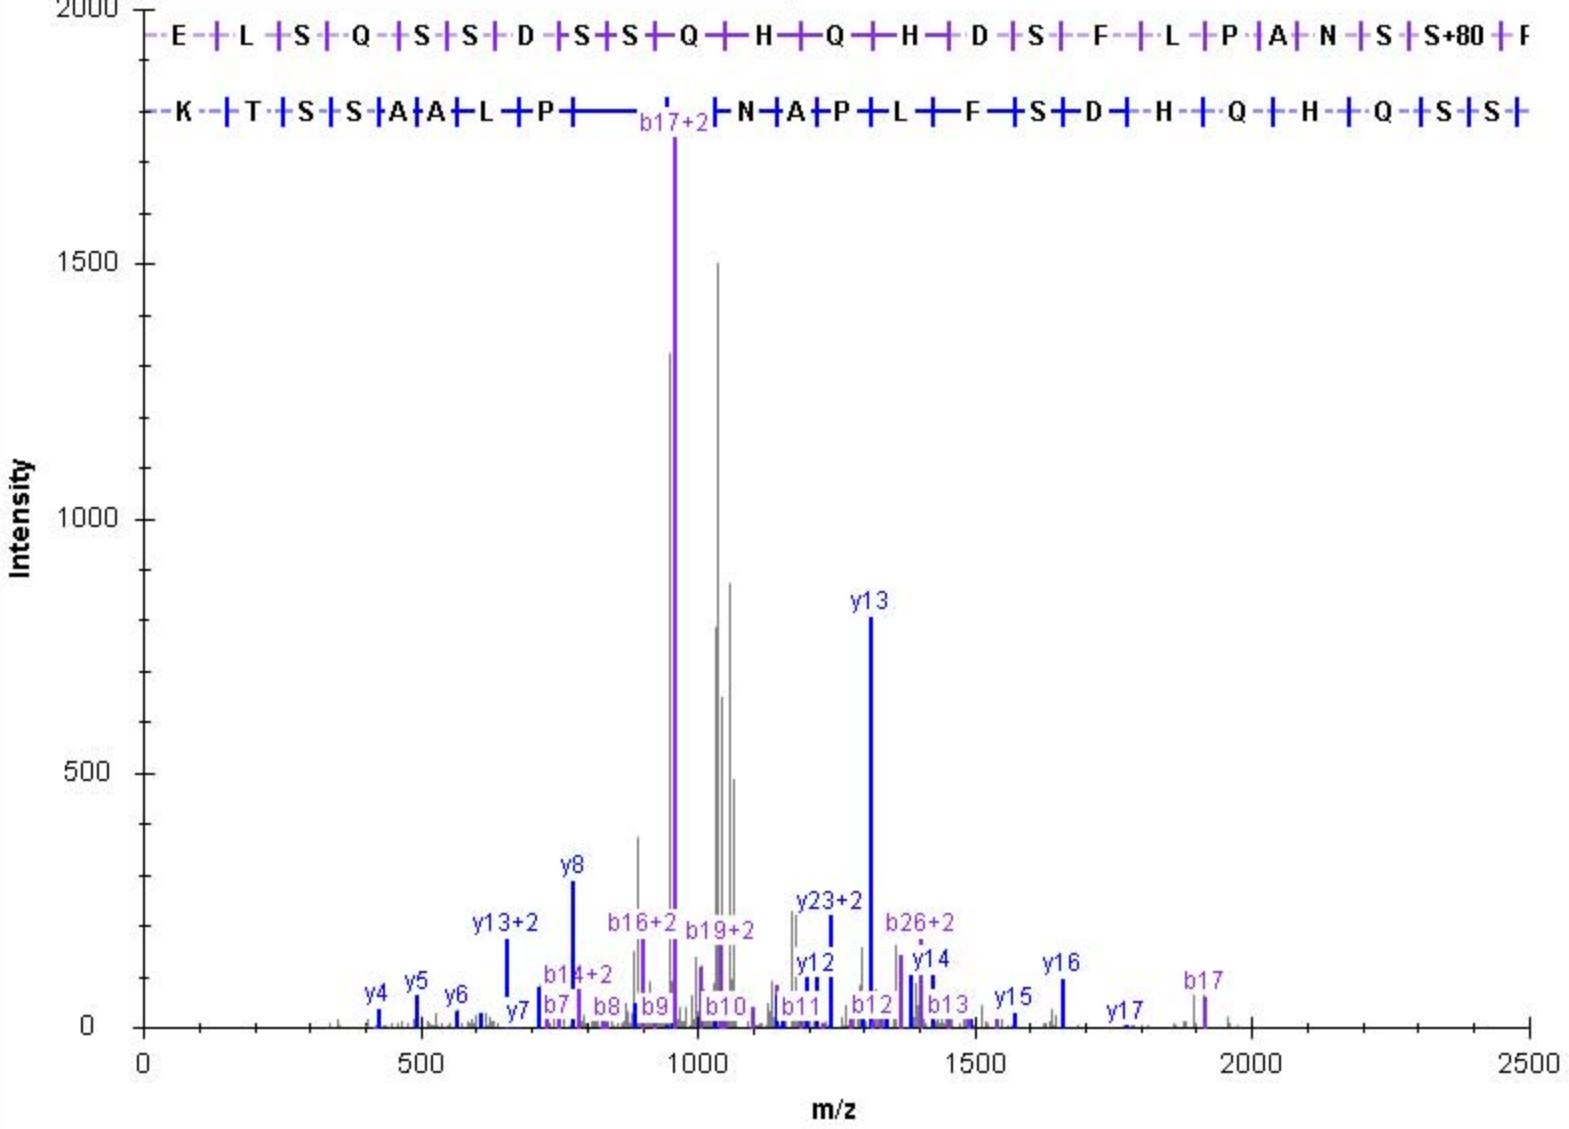

| b               | b(+2)           |    |   | y  | y(+2)           |                 |
|-----------------|-----------------|----|---|----|-----------------|-----------------|
| <b>130.050</b>  | 65.529          | 1  | E | 30 | 3303.451        | 1652.229        |
| 243.134         | 122.071         | 2  | L | 29 | 3174.409        | 1587.708        |
| 330.166         | 165.587         | 3  | S | 28 | 3061.325        | 1531.166        |
| 458.225         | 229.616         | 4  | Q | 27 | 2974.293        | 1487.650        |
| <b>545.257</b>  | 273.132         | 5  | S | 26 | 2846.234        | <b>1423.621</b> |
| 712.289         | 356.648         | 6  | S | 25 | 2759.202        | 1380.105        |
| <b>827.316</b>  | 414.161         | 7  | D | 24 | 2592.170        | <b>1296.589</b> |
| <b>914.348</b>  | 457.677         | 8  | S | 23 | 2477.143        | <b>1239.075</b> |
| 1081.380        | 541.193         | 9  | S | 22 | 2390.111        | <b>1195.559</b> |
| <b>1209.438</b> | 605.223         | 10 | Q | 21 | 2223.079        | 1112.043        |
| <b>1346.497</b> | 673.752         | 11 | H | 20 | 2095.020        | <b>1048.014</b> |
| 1474.556        | 737.781         | 12 | Q | 19 | <b>1957.961</b> | <b>979.484</b>  |
| 1611.615        | <b>806.311</b>  | 13 | H | 18 | <b>1829.903</b> | <b>915.455</b>  |
| <b>1726.642</b> | <b>863.824</b>  | 14 | D | 17 | <b>1692.844</b> | <b>846.926</b>  |
| 1813.674        | <b>907.340</b>  | 15 | S | 16 | <b>1577.817</b> | 789.412         |
| 1960.742        | <b>980.875</b>  | 16 | F | 15 | 1490.785        | 745.896         |
| 2073.826        | <b>1037.417</b> | 17 | L | 14 | <b>1343.717</b> | <b>672.362</b>  |
| 2170.879        | <b>1085.943</b> | 18 | P | 13 | <b>1230.632</b> | <b>615.820</b>  |
| 2241.916        | 1121.462        | 19 | A | 12 | <b>1133.580</b> | <b>567.293</b>  |
| 2355.959        | <b>1178.483</b> | 20 | N | 11 | 1062.543        | 531.775         |
| 2442.991        | 1221.999        | 21 | S | 10 | <b>948.500</b>  | 474.753         |
| 2530.023        | 1265.515        | 22 | S | 9  | <b>861.468</b>  | 431.237         |
| 2627.076        | 1314.041        | 23 | P | 8  | <b>774.436</b>  | 387.721         |
| 2740.160        | <b>1370.583</b> | 24 | L | 7  | <b>677.383</b>  | 339.195         |
| 2811.197        | <b>1406.102</b> | 25 | A | 6  | <b>564.299</b>  | 282.653         |
| 2882.234        | <b>1441.621</b> | 26 | A | 5  | 493.262         | 247.134         |
| 2969.266        | 1485.137        | 27 | S | 4  | <b>422.225</b>  | 211.616         |
| 3056.298        | 1528.653        | 28 | S | 3  | 335.193         | 168.100         |
| 3157.346        | <b>1579.176</b> | 29 | T | 2  | 248.160         | 124.584         |
| 3285.441        | 1643.224        | 30 | K | 1  | 147.113         | 74.060          |

controllerType=0 controllerNumber=1 scan=10959

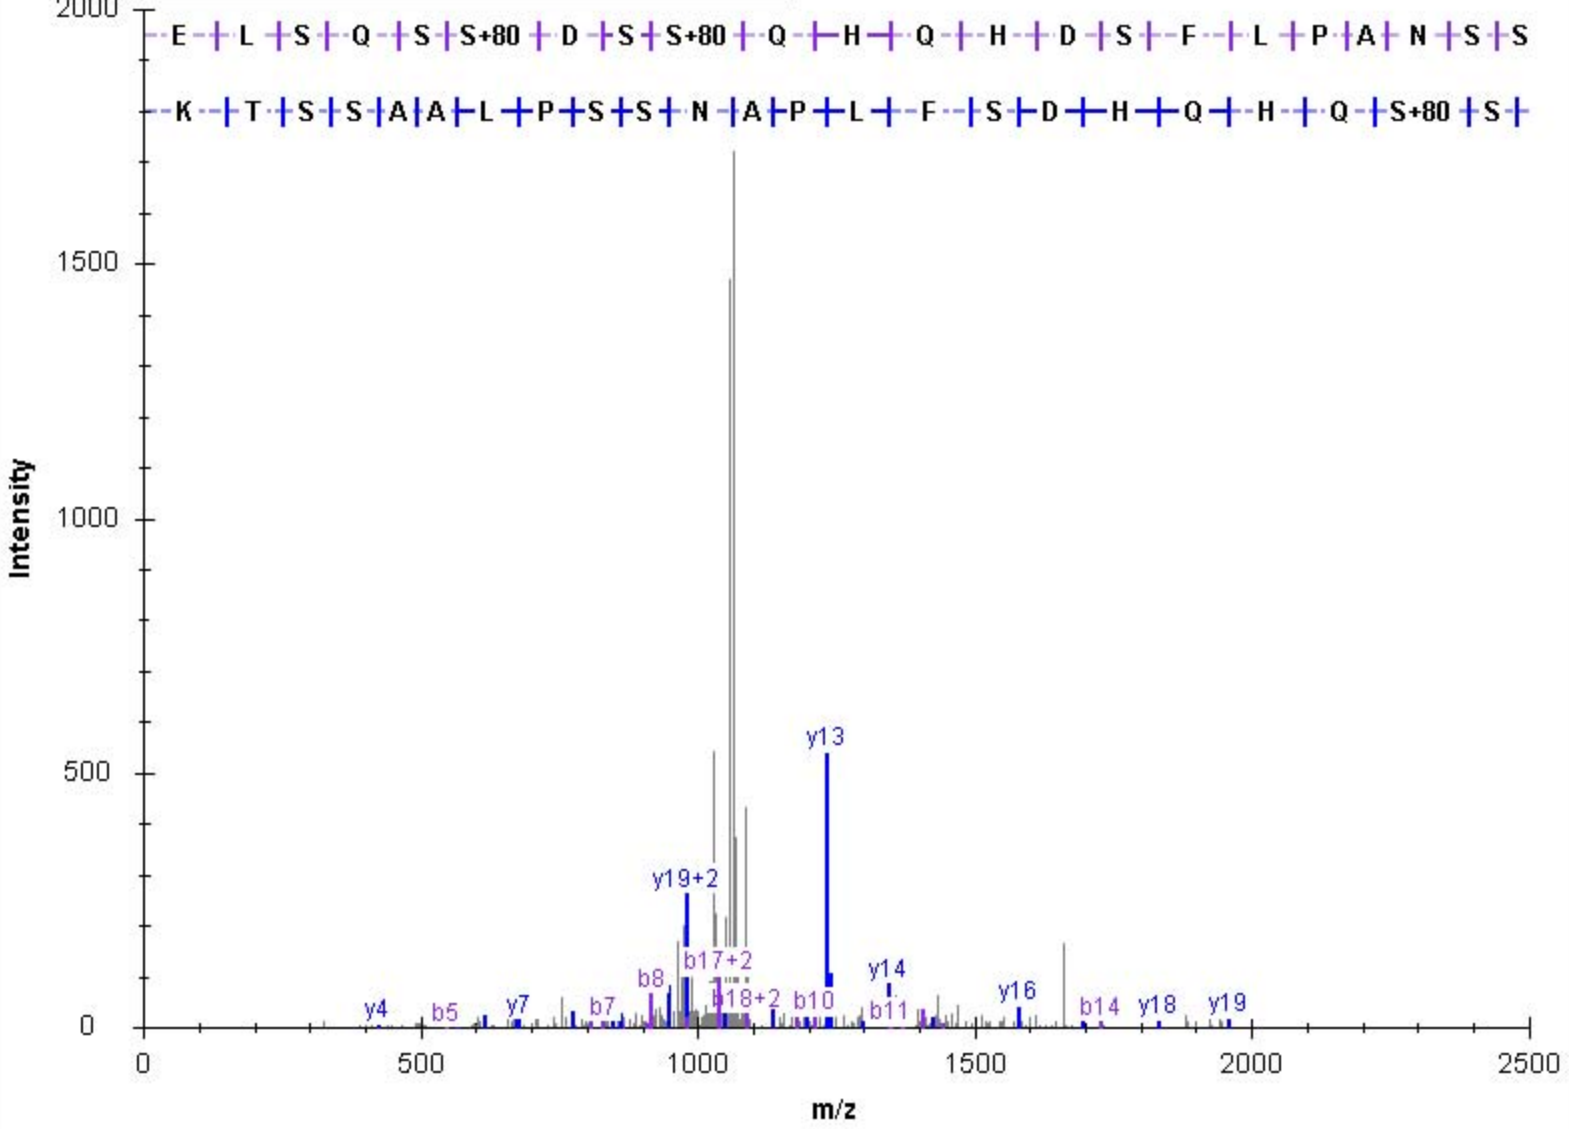



| b               | b(+2)           |    |   | y  | y(+2)           |                 |
|-----------------|-----------------|----|---|----|-----------------|-----------------|
| <b>88.039</b>   | 44.523          | 1  | S | 20 | 2232.077        | 1116.542        |
| 201.123         | 101.065         | 2  | L | 19 | 2145.045        | 1073.026        |
| 298.176         | 149.592         | 3  | P | 18 | 2031.961        | <b>1016.484</b> |
| <b>385.208</b>  | 193.108         | 4  | S | 17 | <b>1934.908</b> | <b>967.958</b>  |
| 472.240         | 236.624         | 5  | S | 16 | <b>1847.876</b> | <b>924.442</b>  |
| <b>601.283</b>  | 301.145         | 6  | E | 15 | <b>1760.844</b> | 880.926         |
| <b>714.367</b>  | 357.687         | 7  | L | 14 | <b>1631.801</b> | <b>816.404</b>  |
| <b>827.451</b>  | 414.229         | 8  | L | 13 | <b>1518.717</b> | 759.862         |
| <b>942.478</b>  | 471.743         | 9  | D | 12 | <b>1405.633</b> | 703.320         |
| <b>1029.510</b> | 515.259         | 10 | S | 11 | <b>1290.606</b> | 645.807         |
| <b>1196.542</b> | 598.775         | 11 | S | 10 | <b>1203.574</b> | 602.291         |
| <b>1283.574</b> | <b>642.291</b>  | 12 | S | 9  | <b>1036.542</b> | 518.775         |
| <b>1398.601</b> | 699.804         | 13 | D | 8  | <b>949.510</b>  | 475.259         |
| <b>1526.696</b> | 763.852         | 14 | K | 7  | <b>834.483</b>  | <b>417.745</b>  |
| <b>1583.717</b> | 792.362         | 15 | G | 6  | <b>706.388</b>  | 353.698         |
| <b>1711.776</b> | <b>856.392</b>  | 16 | Q | 5  | 649.367         | 325.187         |
| <b>1839.834</b> | 920.421         | 17 | Q | 4  | <b>521.308</b>  | 261.158         |
| <b>1938.903</b> | <b>969.955</b>  | 18 | V | 3  | <b>393.250</b>  | 197.128         |
| 2085.971        | <b>1043.489</b> | 19 | F | 2  | 294.181         | 147.594         |
| 2214.066        | 1107.537        | 20 | K | 1  | 147.113         | 74.060          |

controllerType=0 controllerNumber=1 scan=11416

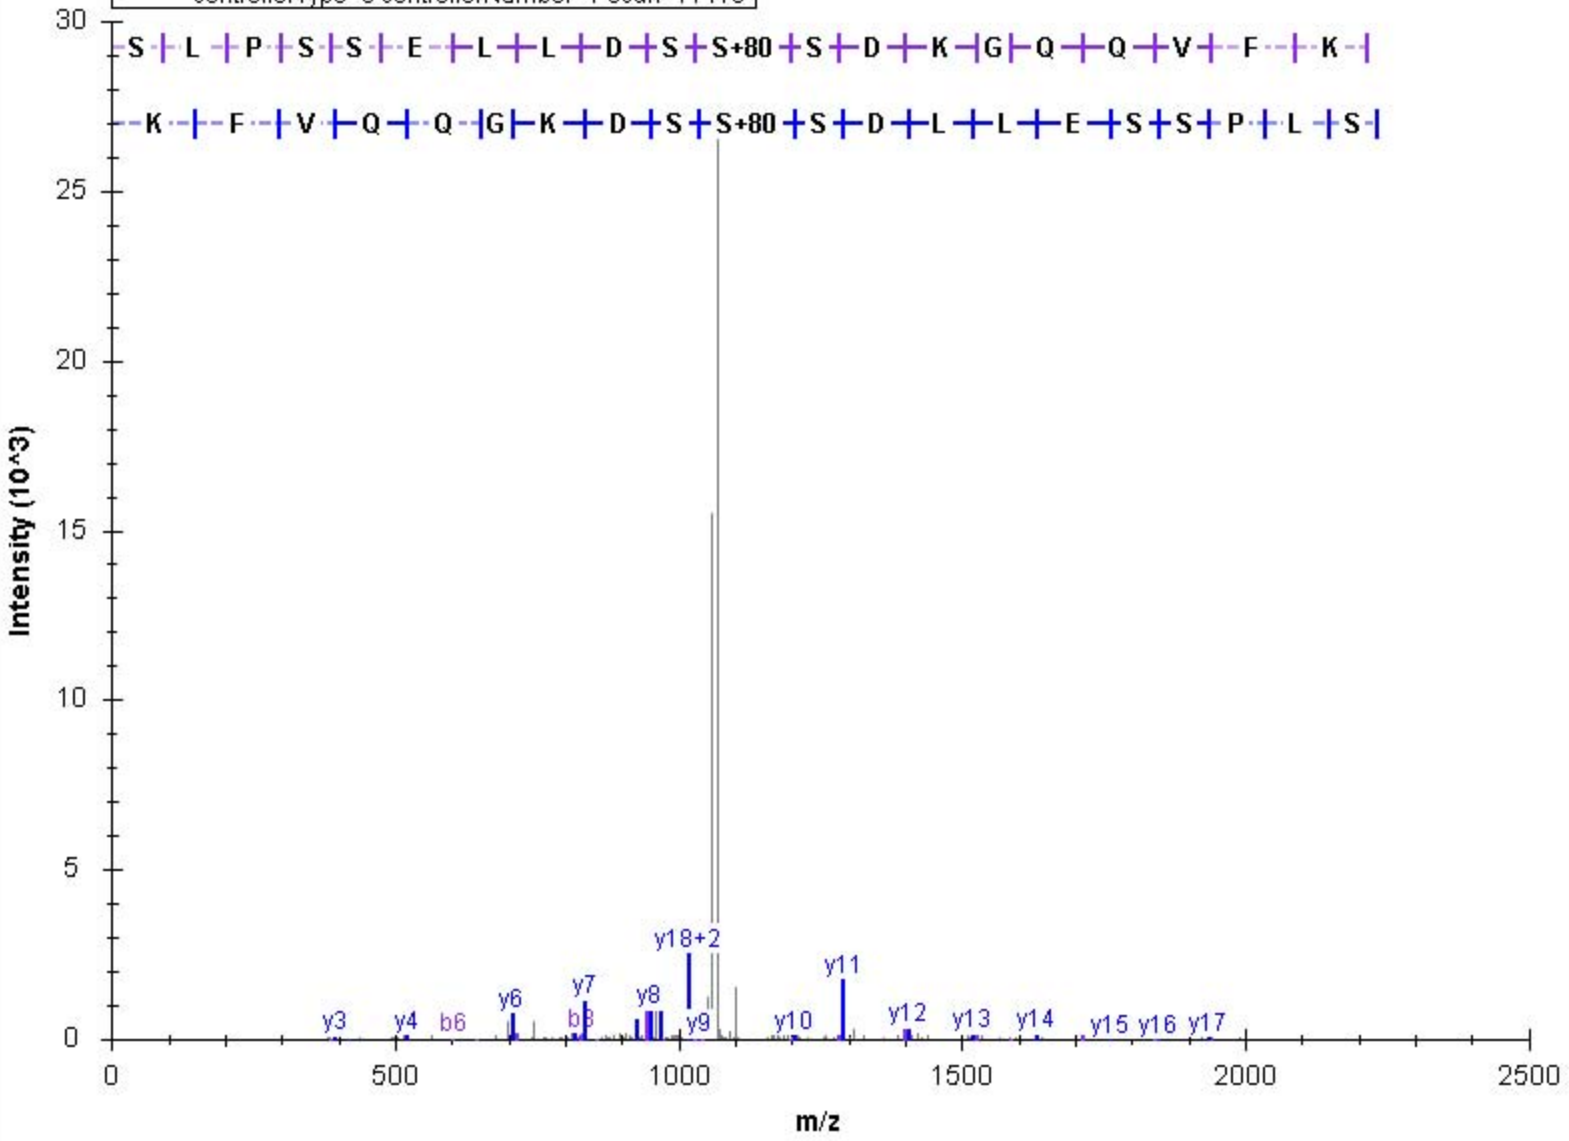

| b              | b(+2)          |   |   | y | y(+2)          |                |
|----------------|----------------|---|---|---|----------------|----------------|
| <b>157.108</b> | 79.058         | 1 | R | 7 | 952.531        | 476.769        |
| <b>324.140</b> | 162.574        | 2 | S | 6 | <b>796.430</b> | <b>398.719</b> |
| <b>437.224</b> | <b>219.116</b> | 3 | L | 5 | <b>629.398</b> | 315.203        |
| <b>552.251</b> | <b>276.629</b> | 4 | D | 4 | <b>516.314</b> | 258.661        |
| <b>665.335</b> | 333.171        | 5 | I | 3 | <b>401.287</b> | 201.147        |
| <b>778.420</b> | 389.713        | 6 | L | 2 | <b>288.203</b> | 144.605        |
| 934.521        | <b>467.764</b> | 7 | R | 1 | <b>175.119</b> | 88.063         |

controllerType=0 controllerNumber=1 scan=10013

Intensity (10<sup>3</sup>)

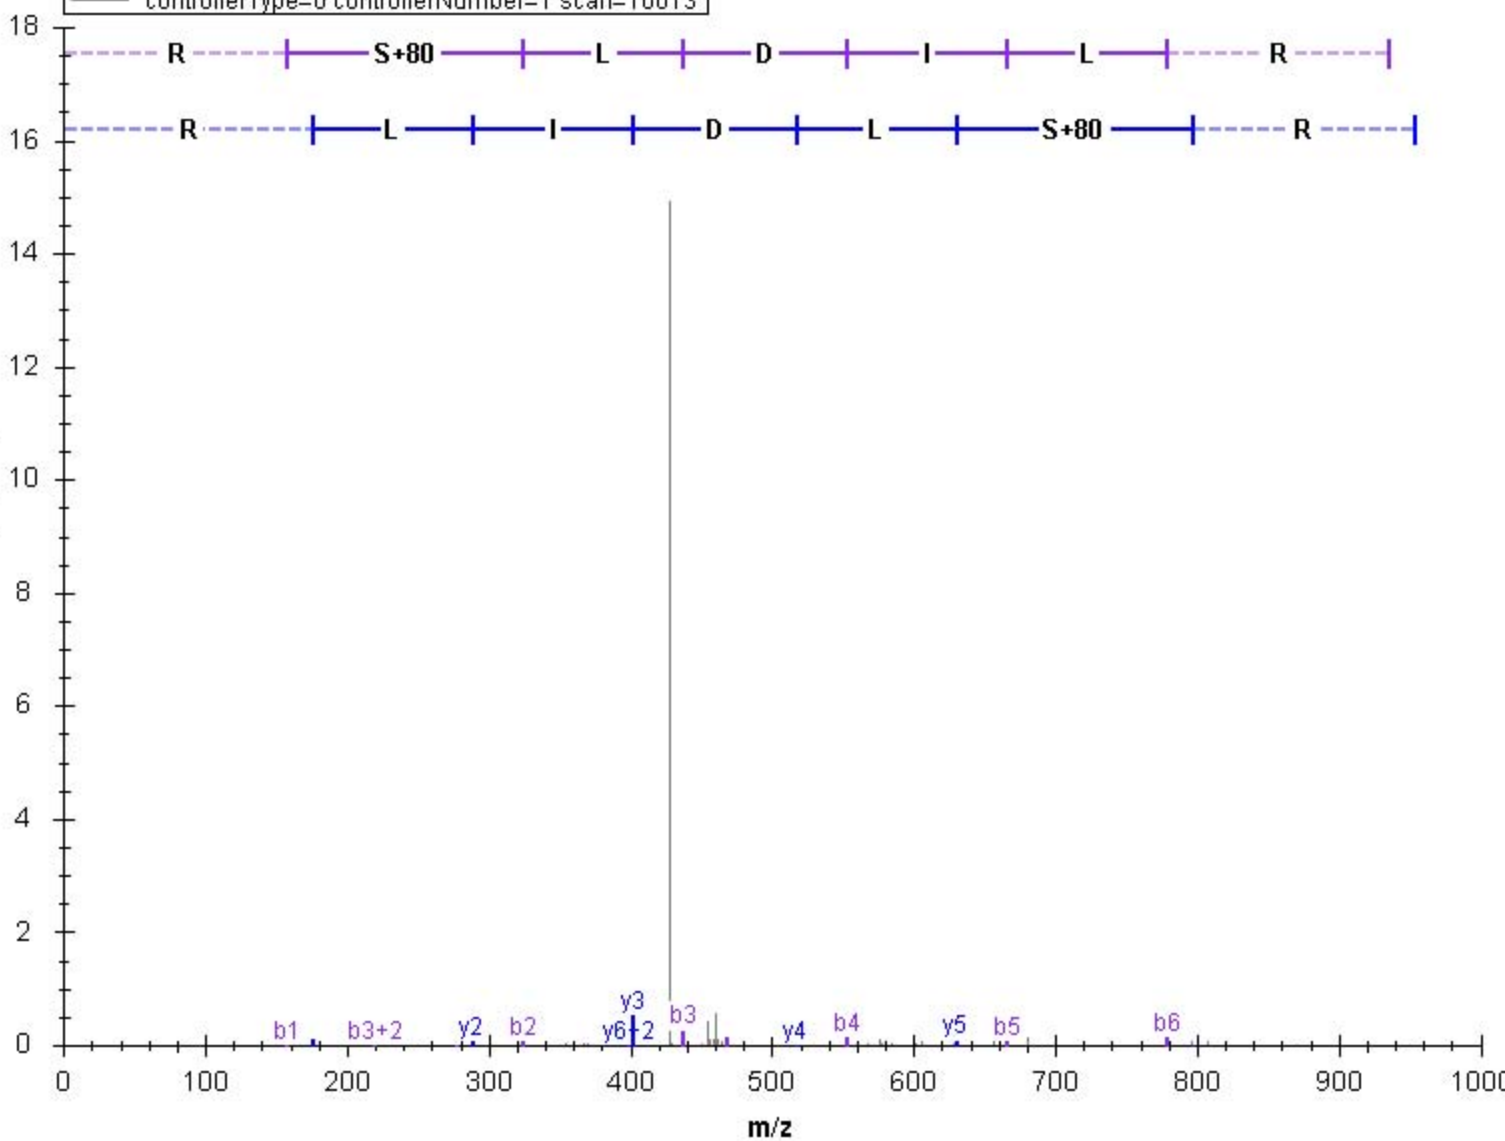

| b               | b(+2)          |    |   |    | y               | y(+2)          |
|-----------------|----------------|----|---|----|-----------------|----------------|
| <b>114.091</b>  | 57.549         | 1  | L | 13 | 1533.655        | 767.331        |
| 171.113         | 86.060         | 2  | G | 12 | 1420.571        | <b>710.789</b> |
| <b>300.155</b>  | 150.581        | 3  | E | 11 | 1363.549        | <b>682.278</b> |
| <b>413.239</b>  | 207.123        | 4  | L | 10 | <b>1234.507</b> | <b>617.757</b> |
| <b>580.271</b>  | 290.639        | 5  | S | 9  | <b>1121.423</b> | <b>561.215</b> |
| <b>667.304</b>  | 334.155        | 6  | S | 8  | <b>954.391</b>  | 477.699        |
| <b>782.330</b>  | <b>391.669</b> | 7  | D | 7  | <b>867.359</b>  | 434.183        |
| <b>897.357</b>  | 449.182        | 8  | D | 6  | <b>752.332</b>  | <b>376.669</b> |
| <b>1028.398</b> | <b>514.703</b> | 9  | M | 5  | <b>637.305</b>  | 319.156        |
| 1159.438        | <b>580.223</b> | 10 | M | 4  | <b>506.264</b>  | 253.636        |
| <b>1272.522</b> | <b>636.765</b> | 11 | L | 3  | <b>375.224</b>  | 188.116        |
| <b>1387.549</b> | 694.278        | 12 | D | 2  | <b>262.140</b>  | 131.574        |
| 1515.644        | <b>758.326</b> | 13 | K | 1  | 147.113         | 74.060         |

controllerType=0 controllerNumber=1 scan=13453

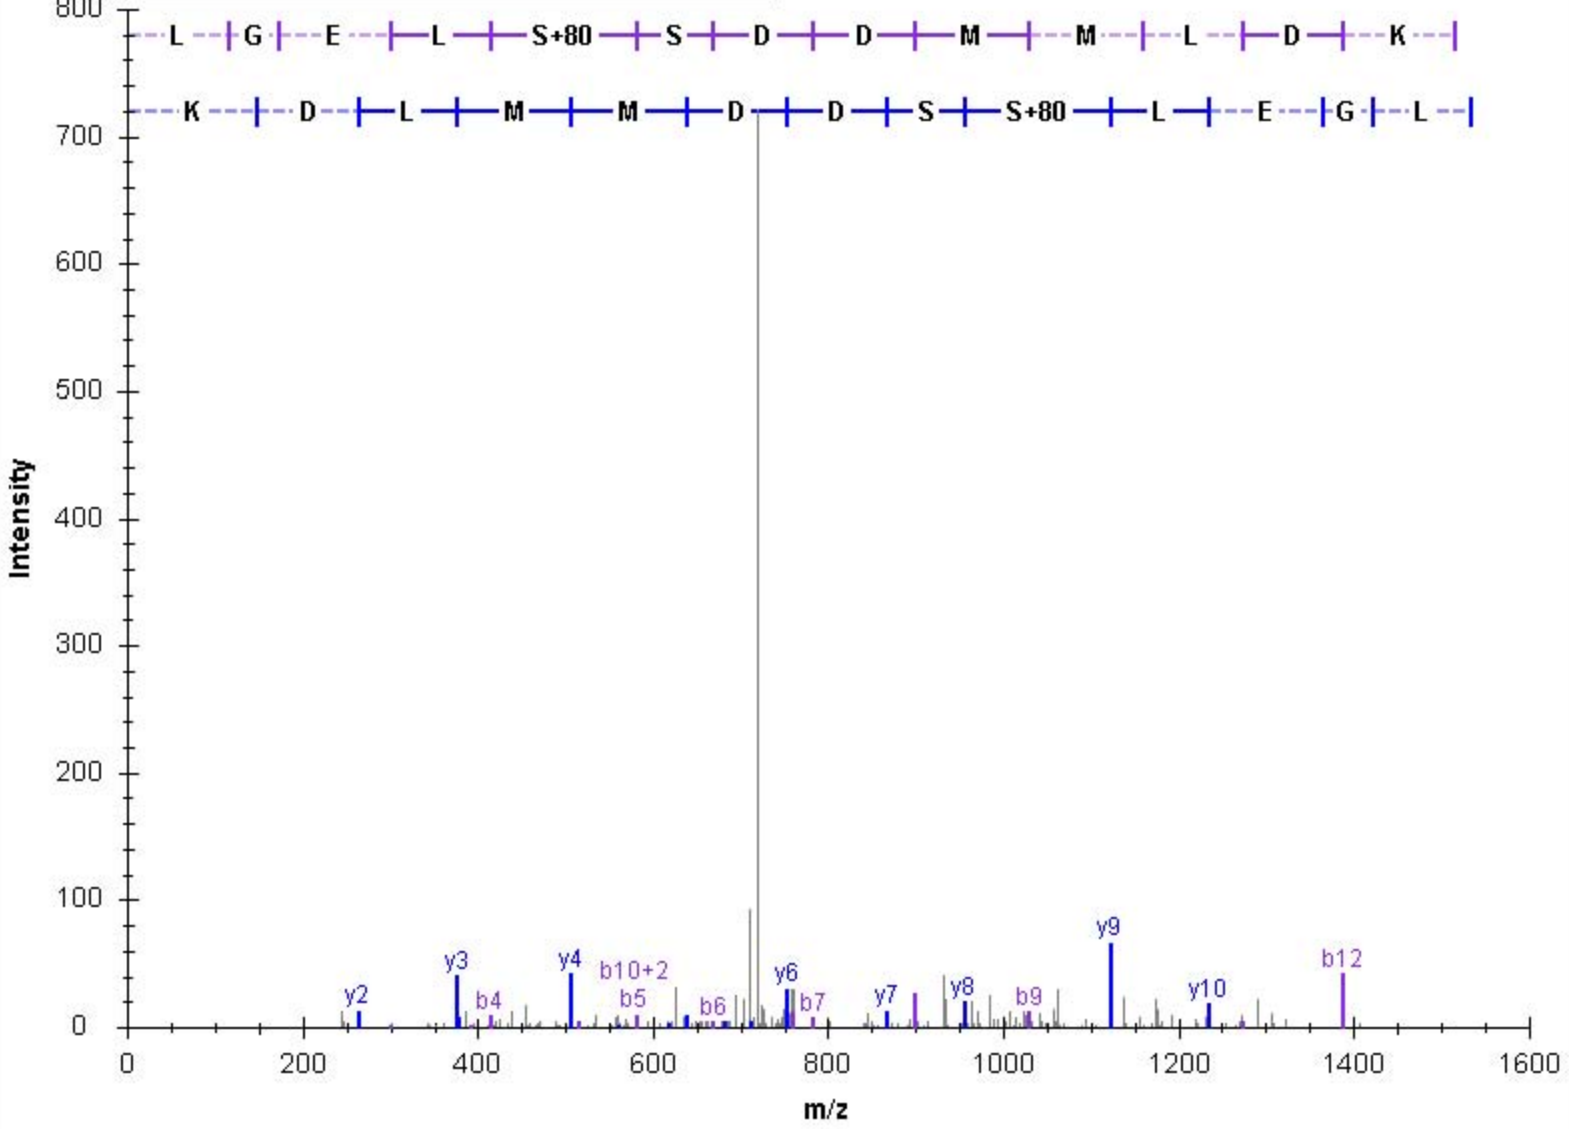

| b               | b(+2)          |    |   |    | y               | y(+2)   |
|-----------------|----------------|----|---|----|-----------------|---------|
| 157.108         | 79.058         | 1  | R | 15 | 1750.845        | 875.926 |
| <b>270.192</b>  | 135.600        | 2  | L | 14 | 1594.743        | 797.875 |
| 437.224         | 219.116        | 3  | S | 13 | <b>1481.659</b> | 741.333 |
| <b>552.251</b>  | 276.629        | 4  | D | 12 | <b>1314.627</b> | 657.817 |
| <b>665.335</b>  | 333.171        | 5  | L | 11 | <b>1199.600</b> | 600.304 |
| <b>832.368</b>  | 416.687        | 6  | S | 10 | <b>1086.516</b> | 543.762 |
| <b>931.436</b>  | 466.222        | 7  | V | 9  | <b>919.484</b>  | 460.246 |
| <b>1045.479</b> | 523.243        | 8  | N | 8  | <b>820.416</b>  | 410.712 |
| <b>1132.511</b> | 566.759        | 9  | S | 7  | <b>706.373</b>  | 353.690 |
| 1219.543        | 610.275        | 10 | S | 6  | <b>619.341</b>  | 310.174 |
| <b>1276.564</b> | 638.786        | 11 | G | 5  | <b>532.309</b>  | 266.658 |
| 1404.623        | 702.815        | 12 | Q | 4  | 475.287         | 238.147 |
| 1517.707        | 759.357        | 13 | I | 3  | 347.229         | 174.118 |
| 1604.739        | <b>802.873</b> | 14 | S | 2  | 234.145         | 117.576 |
| 1732.834        | <b>866.921</b> | 15 | K | 1  | 147.113         | 74.060  |

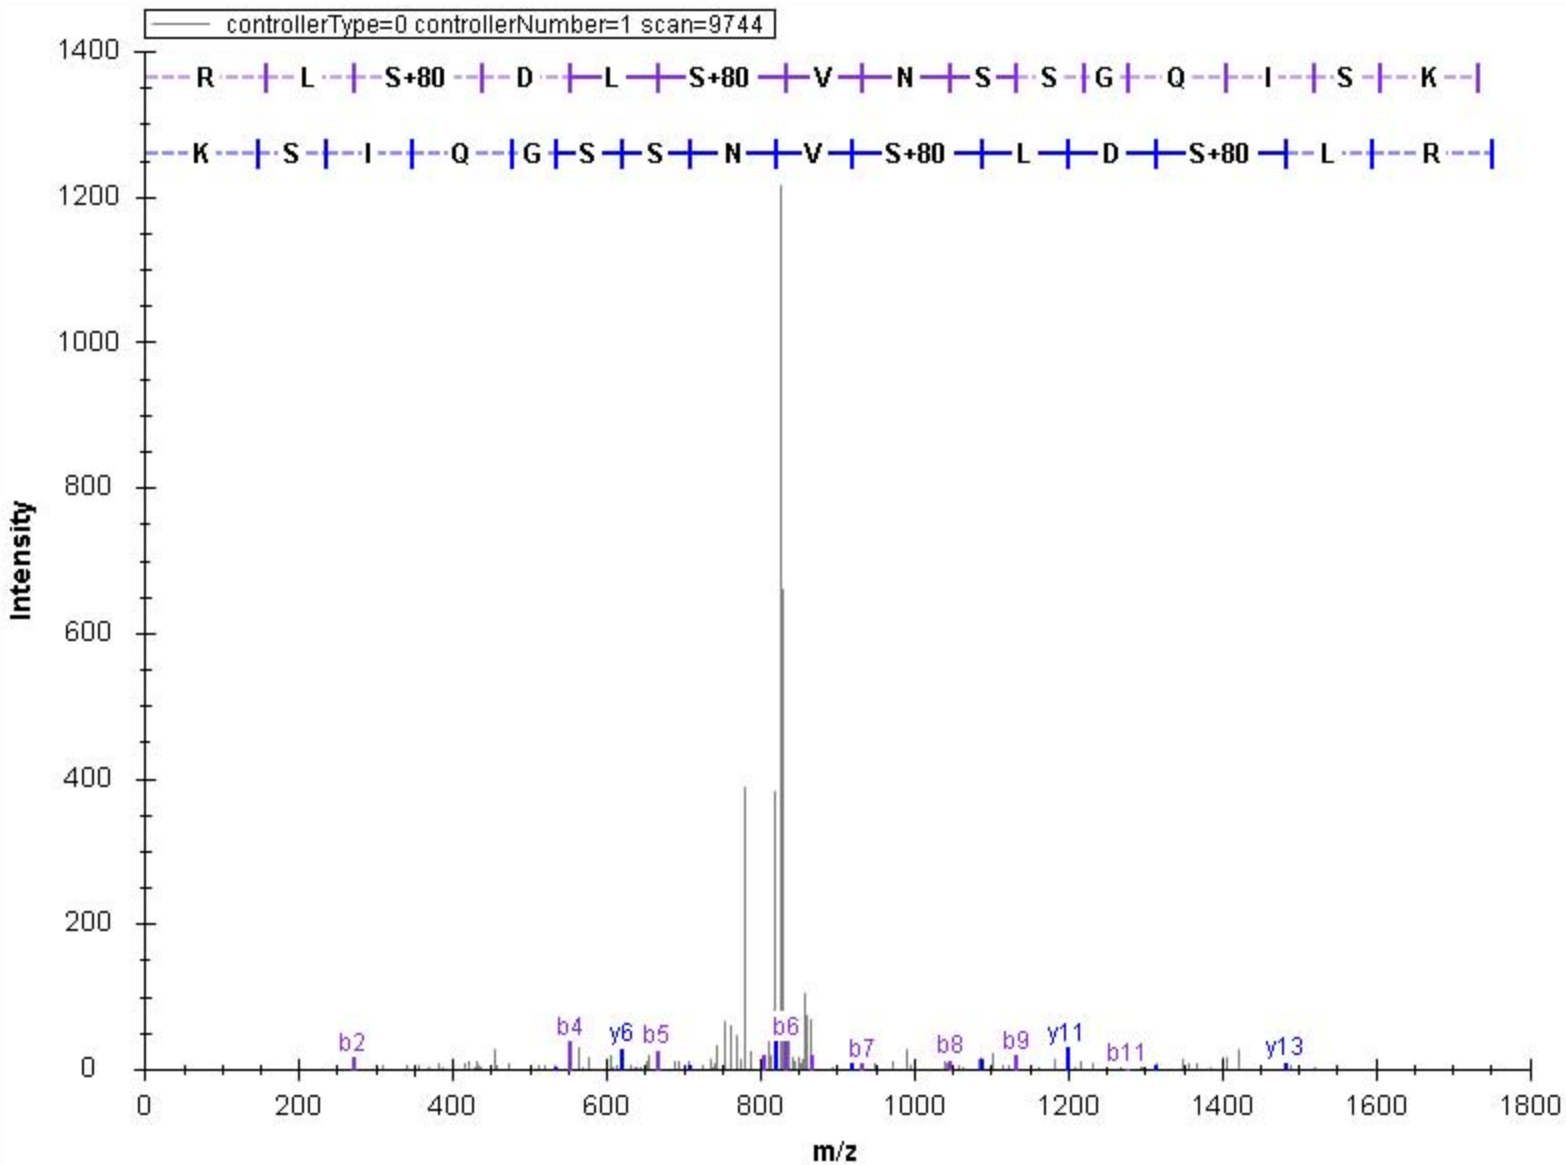



| b               | b(+2)          |    |   |    | y               | y(+2)          |
|-----------------|----------------|----|---|----|-----------------|----------------|
| 157.108         | 79.058         | 1  | R | 15 | 1750.845        | 875.926        |
| <b>270.192</b>  | 135.600        | 2  | L | 14 | 1594.743        | 797.875        |
| <b>437.224</b>  | 219.116        | 3  | S | 13 | <b>1481.659</b> | 741.333        |
| <b>552.251</b>  | 276.629        | 4  | D | 12 | <b>1314.627</b> | <b>657.817</b> |
| <b>665.335</b>  | 333.171        | 5  | L | 11 | <b>1199.600</b> | 600.304        |
| 752.368         | 376.687        | 6  | S | 10 | <b>1086.516</b> | 543.762        |
| 851.436         | 426.222        | 7  | V | 9  | <b>999.484</b>  | 500.246        |
| <b>965.479</b>  | 483.243        | 8  | N | 8  | <b>900.416</b>  | 450.712        |
| <b>1132.511</b> | 566.759        | 9  | S | 7  | <b>786.373</b>  | 393.690        |
| 1219.543        | 610.275        | 10 | S | 6  | <b>619.341</b>  | 310.174        |
| <b>1276.564</b> | <b>638.786</b> | 11 | G | 5  | <b>532.309</b>  | 266.658        |
| <b>1404.623</b> | 702.815        | 12 | Q | 4  | <b>475.287</b>  | 238.147        |
| <b>1517.707</b> | 759.357        | 13 | I | 3  | <b>347.229</b>  | 174.118        |
| <b>1604.739</b> | <b>802.873</b> | 14 | S | 2  | 234.145         | 117.576        |
| 1732.834        | <b>866.921</b> | 15 | K | 1  | 147.113         | 74.060         |

controllerType=0 controllerNumber=1 scan=9559

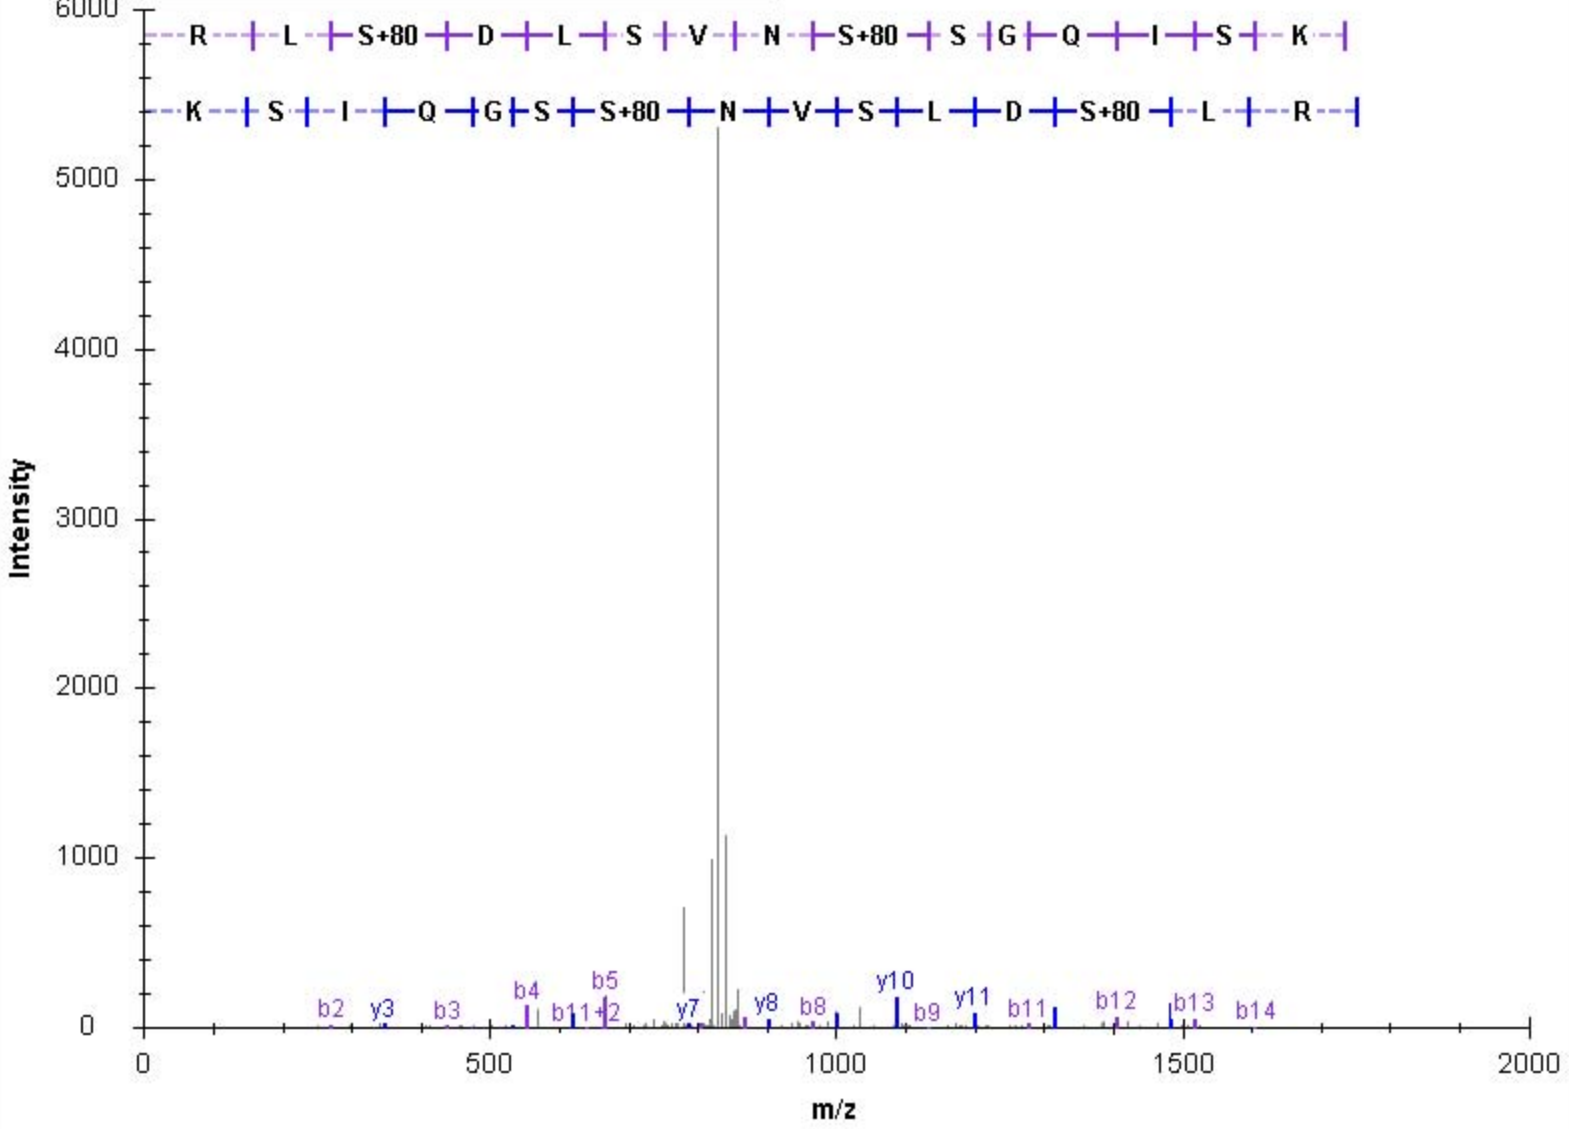

| b               | b(+2)          |    |   |    | y               | y(+2)          |
|-----------------|----------------|----|---|----|-----------------|----------------|
| 157.108         | 79.058         | 1  | R | 15 | 1670.845        | 835.926        |
| <b>270.192</b>  | 135.600        | 2  | L | 14 | 1514.743        | <b>757.875</b> |
| <b>437.224</b>  | 219.116        | 3  | S | 13 | <b>1401.659</b> | <b>701.333</b> |
| <b>552.251</b>  | 276.629        | 4  | D | 12 | <b>1234.627</b> | 617.817        |
| <b>665.335</b>  | 333.171        | 5  | L | 11 | <b>1119.600</b> | <b>560.304</b> |
| <b>752.368</b>  | 376.687        | 6  | S | 10 | <b>1006.516</b> | 503.762        |
| <b>851.436</b>  | 426.222        | 7  | V | 9  | <b>919.484</b>  | 460.246        |
| <b>965.479</b>  | 483.243        | 8  | N | 8  | <b>820.416</b>  | 410.712        |
| <b>1052.511</b> | <b>526.759</b> | 9  | S | 7  | <b>706.373</b>  | <b>353.690</b> |
| <b>1139.543</b> | 570.275        | 10 | S | 6  | <b>619.341</b>  | <b>310.174</b> |
| <b>1196.564</b> | <b>598.786</b> | 11 | G | 5  | <b>532.309</b>  | 266.658        |
| <b>1324.623</b> | 662.815        | 12 | Q | 4  | <b>475.287</b>  | 238.147        |
| <b>1437.707</b> | <b>719.357</b> | 13 | I | 3  | <b>347.229</b>  | 174.118        |
| <b>1524.739</b> | <b>762.873</b> | 14 | S | 2  | <b>234.145</b>  | 117.576        |
| 1652.834        | <b>826.921</b> | 15 | K | 1  | 147.113         | 74.060         |

controllerType=0 controllerNumber=1 scan=9682

Intensity (10<sup>3</sup>)

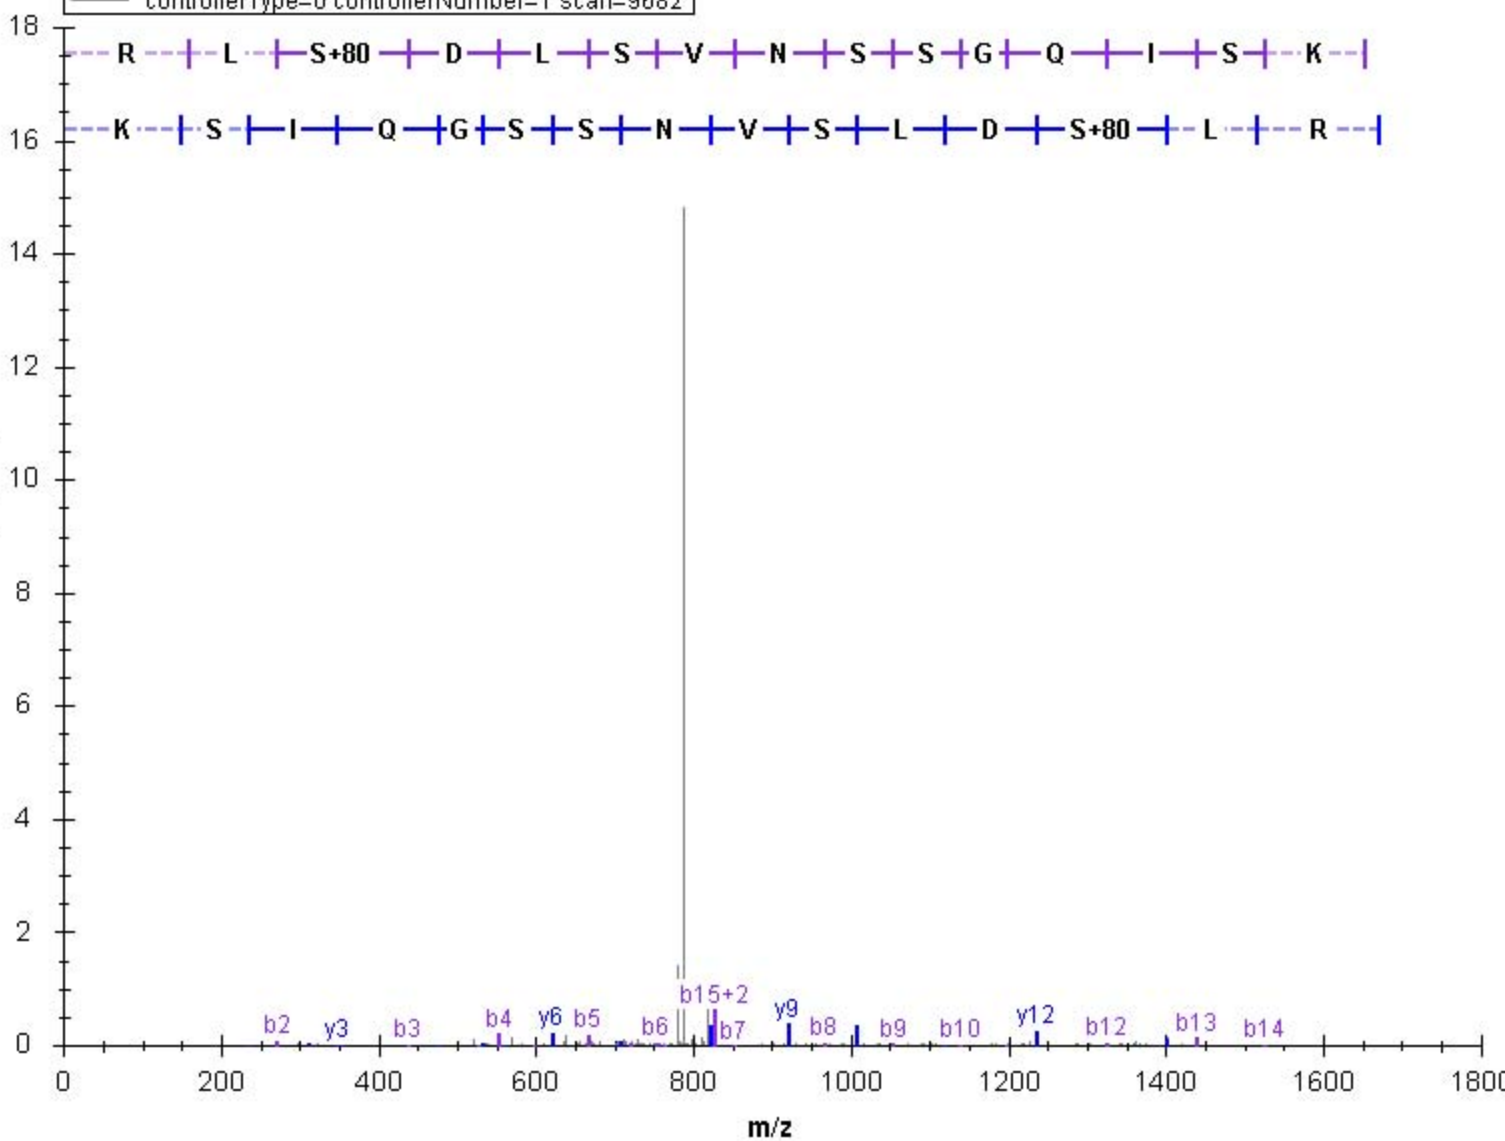

| b        | b(+2)          |    |   |    | y               | y(+2)          |
|----------|----------------|----|---|----|-----------------|----------------|
| 157.108  | 79.058         | 1  | R | 15 | 1670.845        | 835.926        |
| 270.192  | 135.600        | 2  | L | 14 | 1514.743        | 757.875        |
| 357.224  | 179.116        | 3  | S | 13 | <b>1401.659</b> | 701.333        |
| 472.251  | 236.629        | 4  | D | 12 | <b>1314.627</b> | <b>657.817</b> |
| 585.335  | 293.171        | 5  | L | 11 | <b>1199.600</b> | <b>600.304</b> |
| 672.368  | <b>336.687</b> | 6  | S | 10 | <b>1086.516</b> | 543.762        |
| 771.436  | 386.222        | 7  | V | 9  | 999.484         | 500.246        |
| 885.479  | 443.243        | 8  | N | 8  | <b>900.416</b>  | 450.712        |
| 1052.511 | 526.759        | 9  | S | 7  | 786.373         | 393.690        |
| 1139.543 | <b>570.275</b> | 10 | S | 6  | <b>619.341</b>  | 310.174        |
| 1196.564 | 598.786        | 11 | G | 5  | <b>532.309</b>  | <b>266.658</b> |
| 1324.623 | <b>662.815</b> | 12 | Q | 4  | <b>475.287</b>  | 238.147        |
| 1437.707 | <b>719.357</b> | 13 | I | 3  | <b>347.229</b>  | 174.118        |
| 1524.739 | <b>762.873</b> | 14 | S | 2  | <b>234.145</b>  | 117.576        |
| 1652.834 | <b>826.921</b> | 15 | K | 1  | 147.113         | 74.060         |

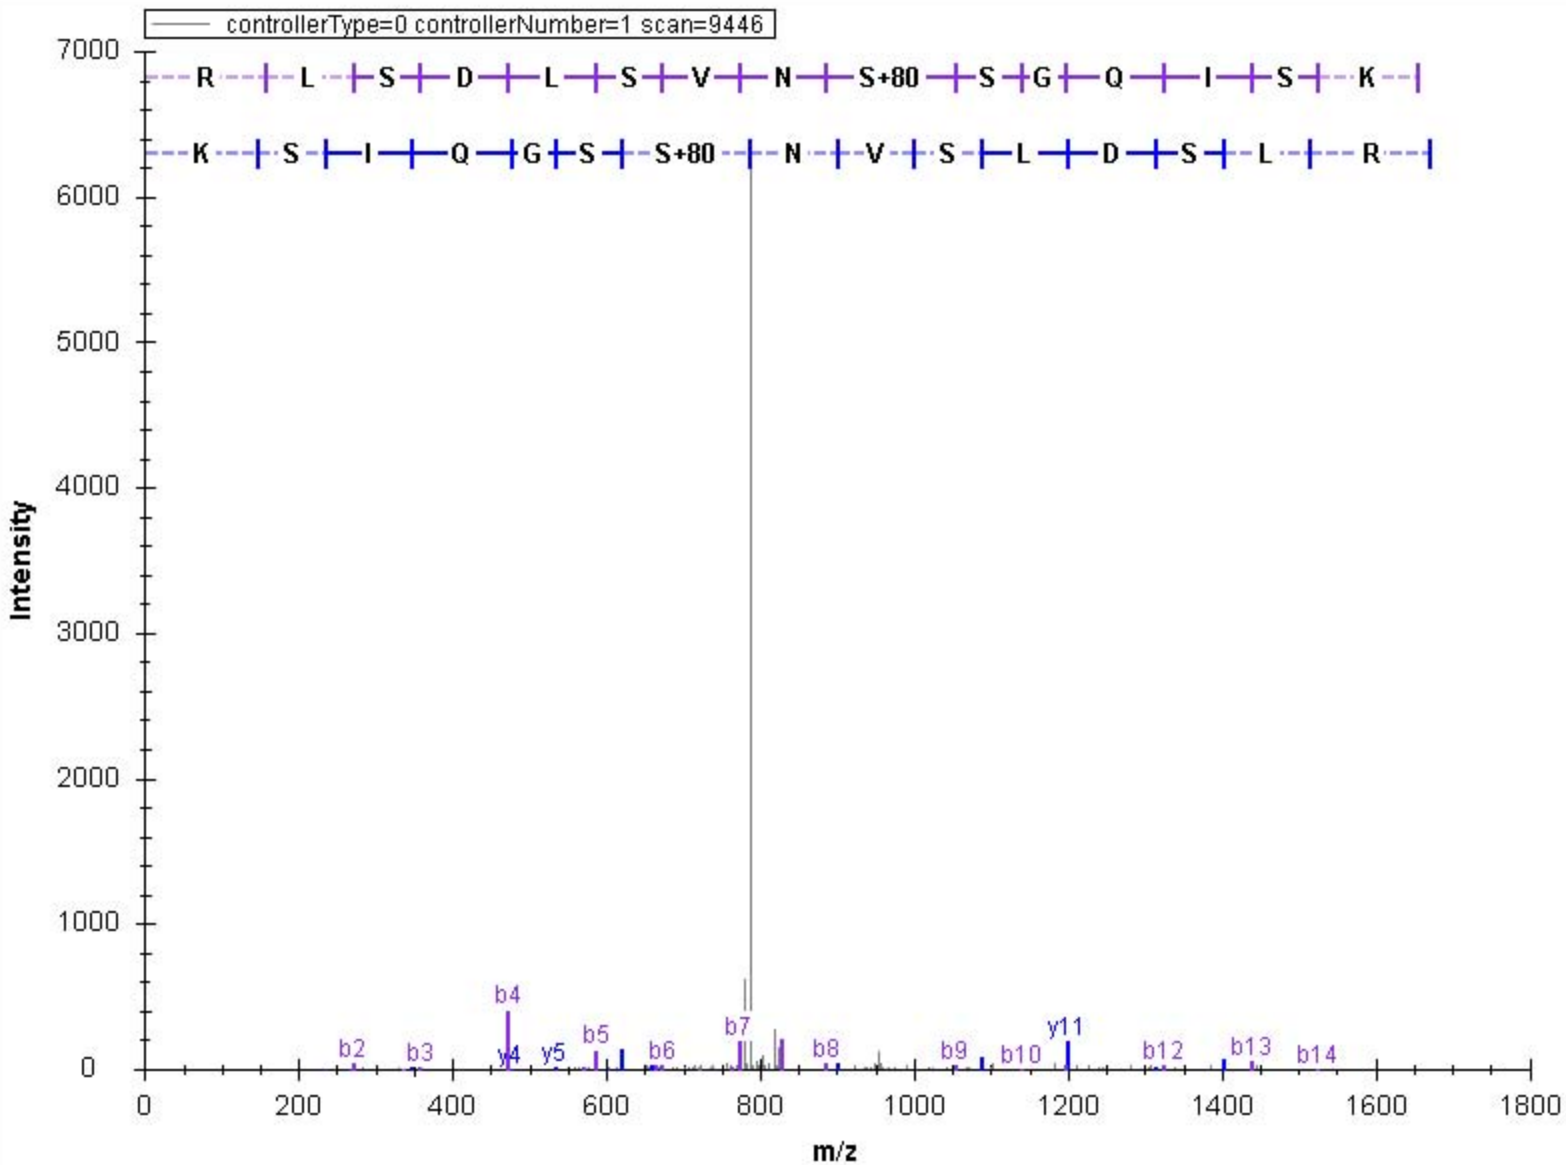

| b               | b(+2)          |    |   |    | y               | y(+2)          |
|-----------------|----------------|----|---|----|-----------------|----------------|
| 114.091         | 57.549         | 1  | L | 14 | 1514.743        | 757.875        |
| 201.123         | 101.065        | 2  | S | 13 | <b>1401.659</b> | <b>701.333</b> |
| <b>316.150</b>  | 158.579        | 3  | D | 12 | <b>1314.627</b> | <b>657.817</b> |
| <b>429.234</b>  | 215.121        | 4  | L | 11 | <b>1199.600</b> | <b>600.304</b> |
| <b>516.266</b>  | 258.637        | 5  | S | 10 | <b>1086.516</b> | 543.762        |
| <b>615.335</b>  | 308.171        | 6  | V | 9  | <b>999.484</b>  | <b>500.246</b> |
| <b>729.378</b>  | <b>365.193</b> | 7  | N | 8  | <b>900.416</b>  | <b>450.712</b> |
| <b>896.410</b>  | <b>448.709</b> | 8  | S | 7  | <b>786.373</b>  | 393.690        |
| <b>983.442</b>  | 492.225        | 9  | S | 6  | <b>619.341</b>  | 310.174        |
| <b>1040.463</b> | 520.735        | 10 | G | 5  | <b>532.309</b>  | <b>266.658</b> |
| <b>1168.522</b> | <b>584.765</b> | 11 | Q | 4  | <b>475.287</b>  | 238.147        |
| <b>1281.606</b> | <b>641.307</b> | 12 | I | 3  | <b>347.229</b>  | 174.118        |
| <b>1368.638</b> | <b>684.823</b> | 13 | S | 2  | <b>234.145</b>  | 117.576        |
| 1496.733        | <b>748.870</b> | 14 | K | 1  | 147.113         | 74.060         |

controllerType=0 controllerNumber=1 scan=8324

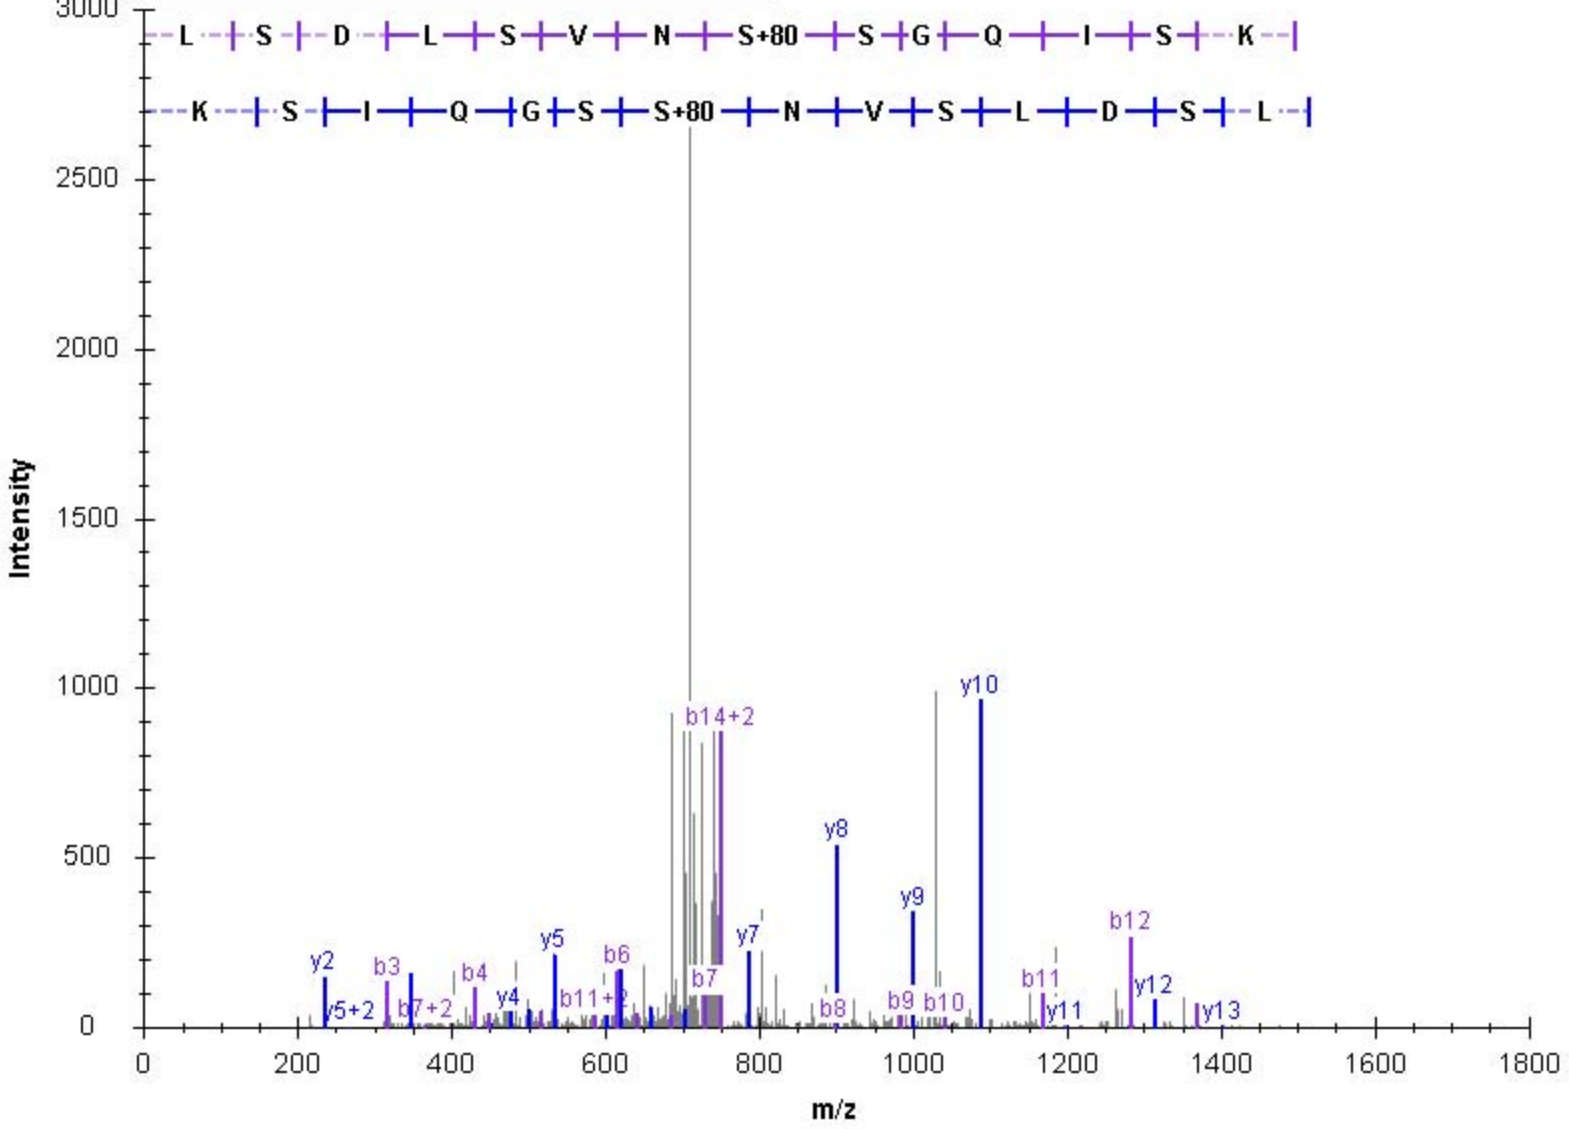



| b               | b(+2)          |    |   |    | y               | y(+2)           |
|-----------------|----------------|----|---|----|-----------------|-----------------|
| <b>58.029</b>   | 29.518         | 1  | G | 18 | 2116.931        | 1058.969        |
| 115.050         | 58.029         | 2  | G | 17 | 2059.909        | 1030.458        |
| 228.134         | 114.571        | 3  | L | 16 | 2002.888        | <b>1001.948</b> |
| 329.182         | 165.095        | 4  | T | 15 | 1889.804        | <b>945.406</b>  |
| <b>416.214</b>  | 208.611        | 5  | S | 14 | <b>1788.756</b> | <b>894.882</b>  |
| <b>531.241</b>  | 266.124        | 6  | D | 13 | <b>1701.724</b> | <b>851.366</b>  |
| <b>645.284</b>  | <b>323.146</b> | 7  | N | 12 | <b>1586.697</b> | 793.852         |
| <b>760.311</b>  | 380.659        | 8  | D | 11 | <b>1472.654</b> | 736.831         |
| <b>888.406</b>  | 444.707        | 9  | K | 10 | <b>1357.627</b> | 679.317         |
| 1051.469        | 526.238        | 10 | Y | 9  | <b>1229.532</b> | 615.270         |
| 1218.501        | <b>609.754</b> | 11 | S | 8  | <b>1066.469</b> | 533.738         |
| <b>1365.570</b> | <b>683.288</b> | 12 | F | 7  | <b>899.437</b>  | 450.222         |
| <b>1479.612</b> | <b>740.310</b> | 13 | N | 6  | <b>752.369</b>  | 376.688         |
| <b>1593.655</b> | 797.331        | 14 | N | 5  | <b>638.326</b>  | 319.666         |
| <b>1680.687</b> | 840.847        | 15 | S | 4  | <b>524.283</b>  | 262.645         |
| <b>1779.756</b> | 890.382        | 16 | V | 3  | <b>437.251</b>  | 219.129         |
| <b>1942.819</b> | <b>971.913</b> | 17 | Y | 2  | <b>338.182</b>  | 169.595         |
| 2098.920        | 1049.964       | 18 | R | 1  | 175.119         | 88.063          |

controllerType=0 controllerNumber=1 scan=10401

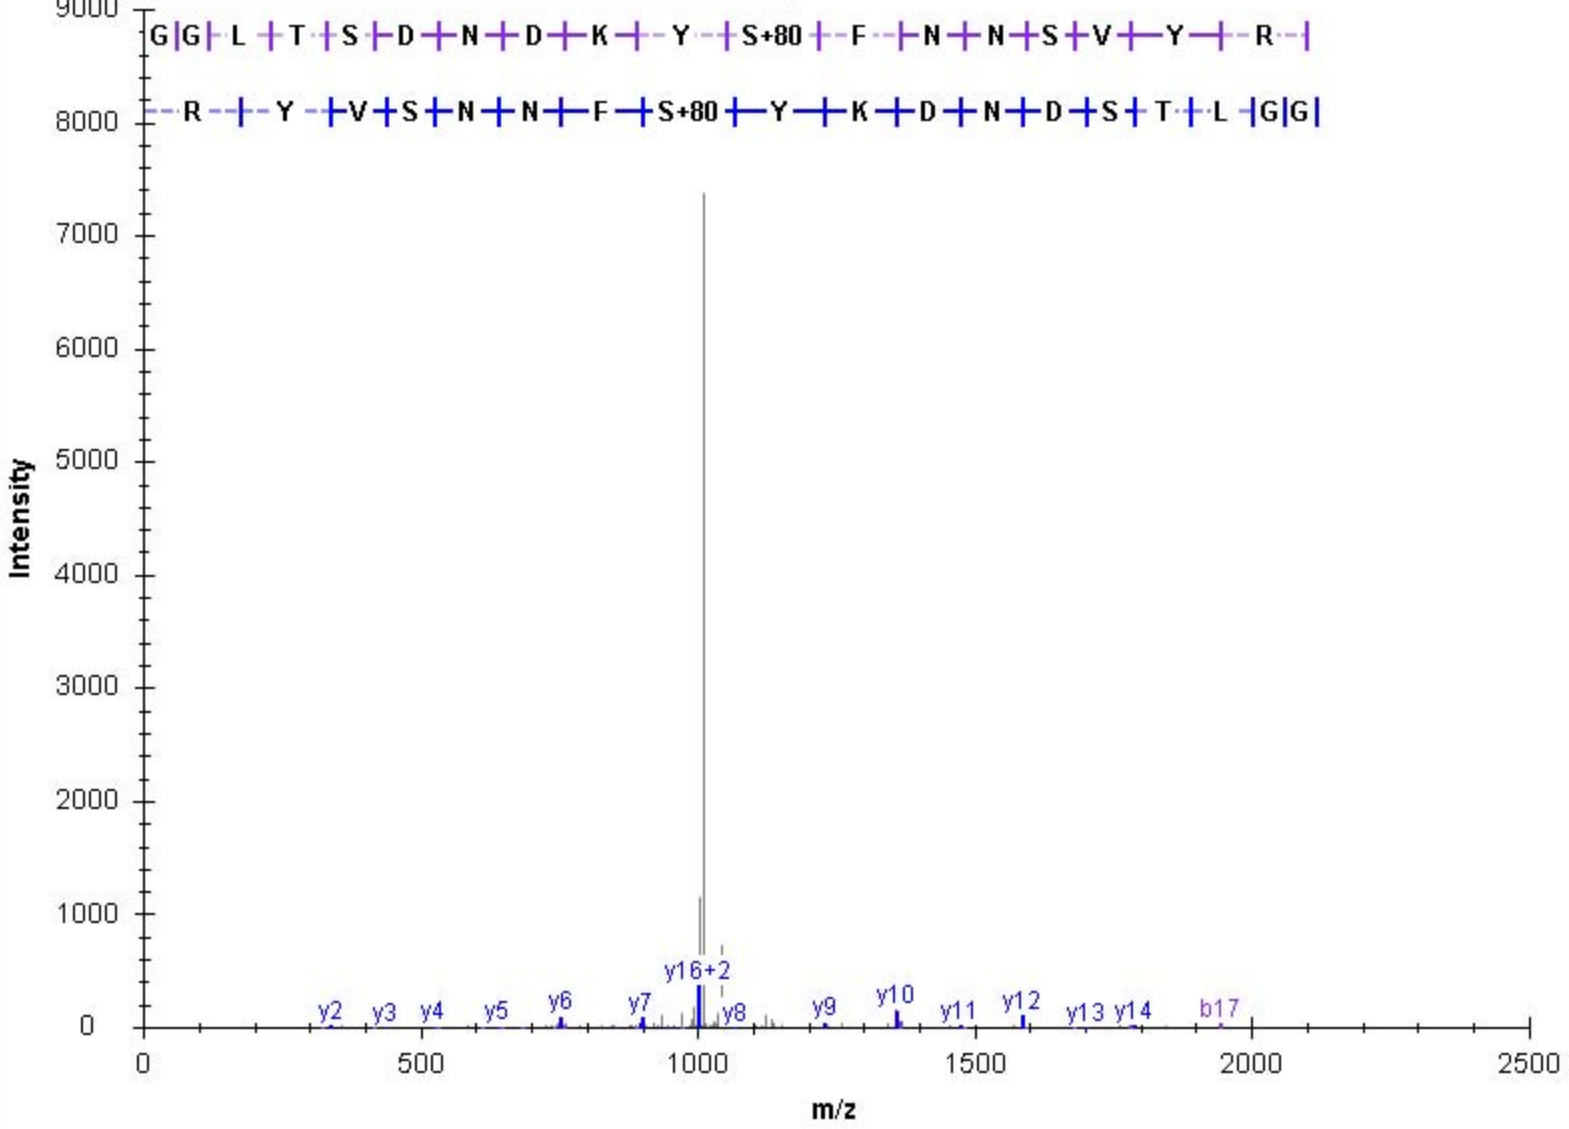

| b               | b(+2)          |    |   |    | y               | y(+2)          |
|-----------------|----------------|----|---|----|-----------------|----------------|
| 187.087         | 94.047         | 1  | W | 12 | 1418.557        | 709.782        |
| <b>318.127</b>  | 159.567        | 2  | M | 11 | <b>1232.477</b> | <b>616.742</b> |
| <b>375.149</b>  | 188.078        | 3  | G | 10 | <b>1101.437</b> | <b>551.222</b> |
| <b>506.189</b>  | 253.598        | 4  | M | 9  | <b>1044.415</b> | <b>522.711</b> |
| <b>620.232</b>  | <b>310.620</b> | 5  | N | 8  | <b>913.375</b>  | <b>457.191</b> |
| <b>787.264</b>  | 394.136        | 6  | S | 7  | <b>799.332</b>  | 400.170        |
| <b>884.317</b>  | <b>442.662</b> | 7  | P | 6  | <b>632.300</b>  | 316.654        |
| <b>941.338</b>  | <b>471.173</b> | 8  | G | 5  | <b>535.247</b>  | <b>268.127</b> |
| <b>1028.370</b> | 514.689        | 9  | S | 4  | <b>478.226</b>  | <b>239.616</b> |
| <b>1129.418</b> | <b>565.213</b> | 10 | T | 3  | <b>391.194</b>  | 196.100        |
| <b>1244.445</b> | <b>622.726</b> | 11 | D | 2  | <b>290.146</b>  | 145.577        |
| 1400.546        | <b>700.777</b> | 12 | R | 1  | 175.119         | 88.063         |

controllerType=0 controllerNumber=1 scan=8693

Intensity (10<sup>3</sup>)

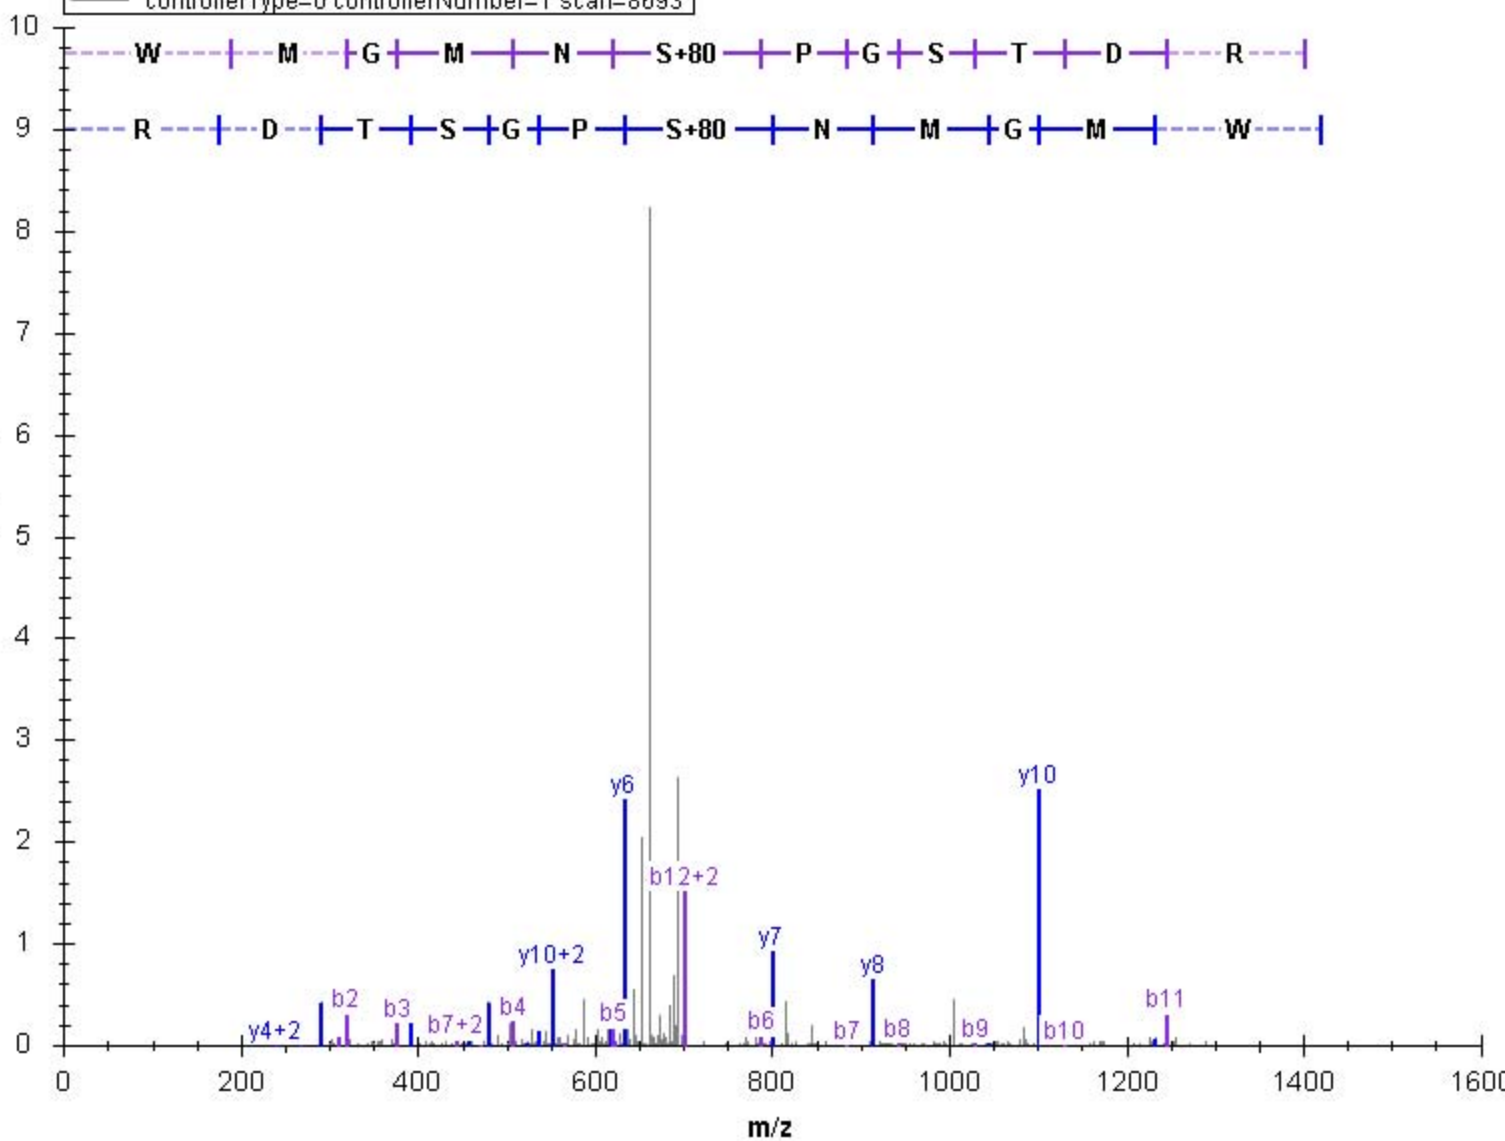

| b               | b(+2)           |    |   | y  | y(+2)           |                 |
|-----------------|-----------------|----|---|----|-----------------|-----------------|
| <b>129.102</b>  | 65.055          | 1  | K | 28 | 2957.256        | 1479.132        |
| 216.134         | 108.571         | 2  | S | 27 | 2829.161        | <b>1415.084</b> |
| <b>383.166</b>  | 192.087         | 3  | S | 26 | 2742.129        | <b>1371.568</b> |
| <b>496.250</b>  | 248.629         | 4  | L | 25 | 2575.097        | 1288.052        |
| <b>659.314</b>  | <b>330.160</b>  | 5  | Y | 24 | 2462.013        | <b>1231.510</b> |
| <b>716.335</b>  | 358.671         | 6  | G | 23 | 2298.950        | <b>1149.978</b> |
| <b>803.367</b>  | 402.187         | 7  | S | 22 | 2241.928        | <b>1121.468</b> |
| <b>917.410</b>  | <b>459.209</b>  | 8  | N | 21 | 2154.896        | <b>1077.952</b> |
| <b>974.432</b>  | 487.719         | 9  | G | 20 | 2040.853        | <b>1020.930</b> |
| <b>1087.516</b> | <b>544.261</b>  | 10 | I | 19 | 1983.832        | 992.419         |
| <b>1201.559</b> | 601.283         | 11 | N | 18 | <b>1870.748</b> | <b>935.877</b>  |
| 1288.591        | <b>644.799</b>  | 12 | S | 17 | <b>1756.705</b> | <b>878.856</b>  |
| <b>1448.600</b> | <b>724.804</b>  | 13 | C | 16 | <b>1669.673</b> | <b>835.340</b>  |
| 1505.621        | <b>753.314</b>  | 14 | G | 15 | <b>1509.663</b> | <b>755.335</b>  |
| <b>1665.630</b> | 833.319         | 15 | C | 14 | <b>1452.642</b> | <b>726.825</b>  |
| <b>1764.699</b> | <b>882.853</b>  | 16 | V | 13 | <b>1292.633</b> | <b>646.820</b>  |
| <b>1879.726</b> | <b>940.367</b>  | 17 | D | 12 | <b>1193.564</b> | <b>597.286</b>  |
| <b>1992.810</b> | <b>996.909</b>  | 18 | I | 11 | <b>1078.537</b> | <b>539.772</b>  |
| 2079.842        | <b>1040.425</b> | 19 | S | 10 | <b>965.453</b>  | <b>483.230</b>  |
| 2193.885        | <b>1097.446</b> | 20 | N | 9  | <b>878.421</b>  | 439.714         |
| 2292.953        | <b>1146.980</b> | 21 | V | 8  | <b>764.378</b>  | <b>382.693</b>  |
| 2349.975        | <b>1175.491</b> | 22 | G | 7  | <b>665.310</b>  | 333.159         |
| 2437.007        | <b>1219.007</b> | 23 | S | 6  | <b>608.289</b>  | 304.648         |
| 2566.049        | <b>1283.528</b> | 24 | E | 5  | <b>521.257</b>  | 261.132         |
| 2653.081        | <b>1327.044</b> | 25 | S | 4  | <b>392.214</b>  | 196.611         |
| 2710.103        | <b>1355.555</b> | 26 | G | 3  | <b>305.182</b>  | 153.095         |
| 2811.150        | <b>1406.079</b> | 27 | T | 2  | 248.160         | 124.584         |
| 2939.245        | 1470.126        | 28 | K | 1  | 147.113         | 74.060          |

controllerType=0 controllerNumber=1 scan=9436

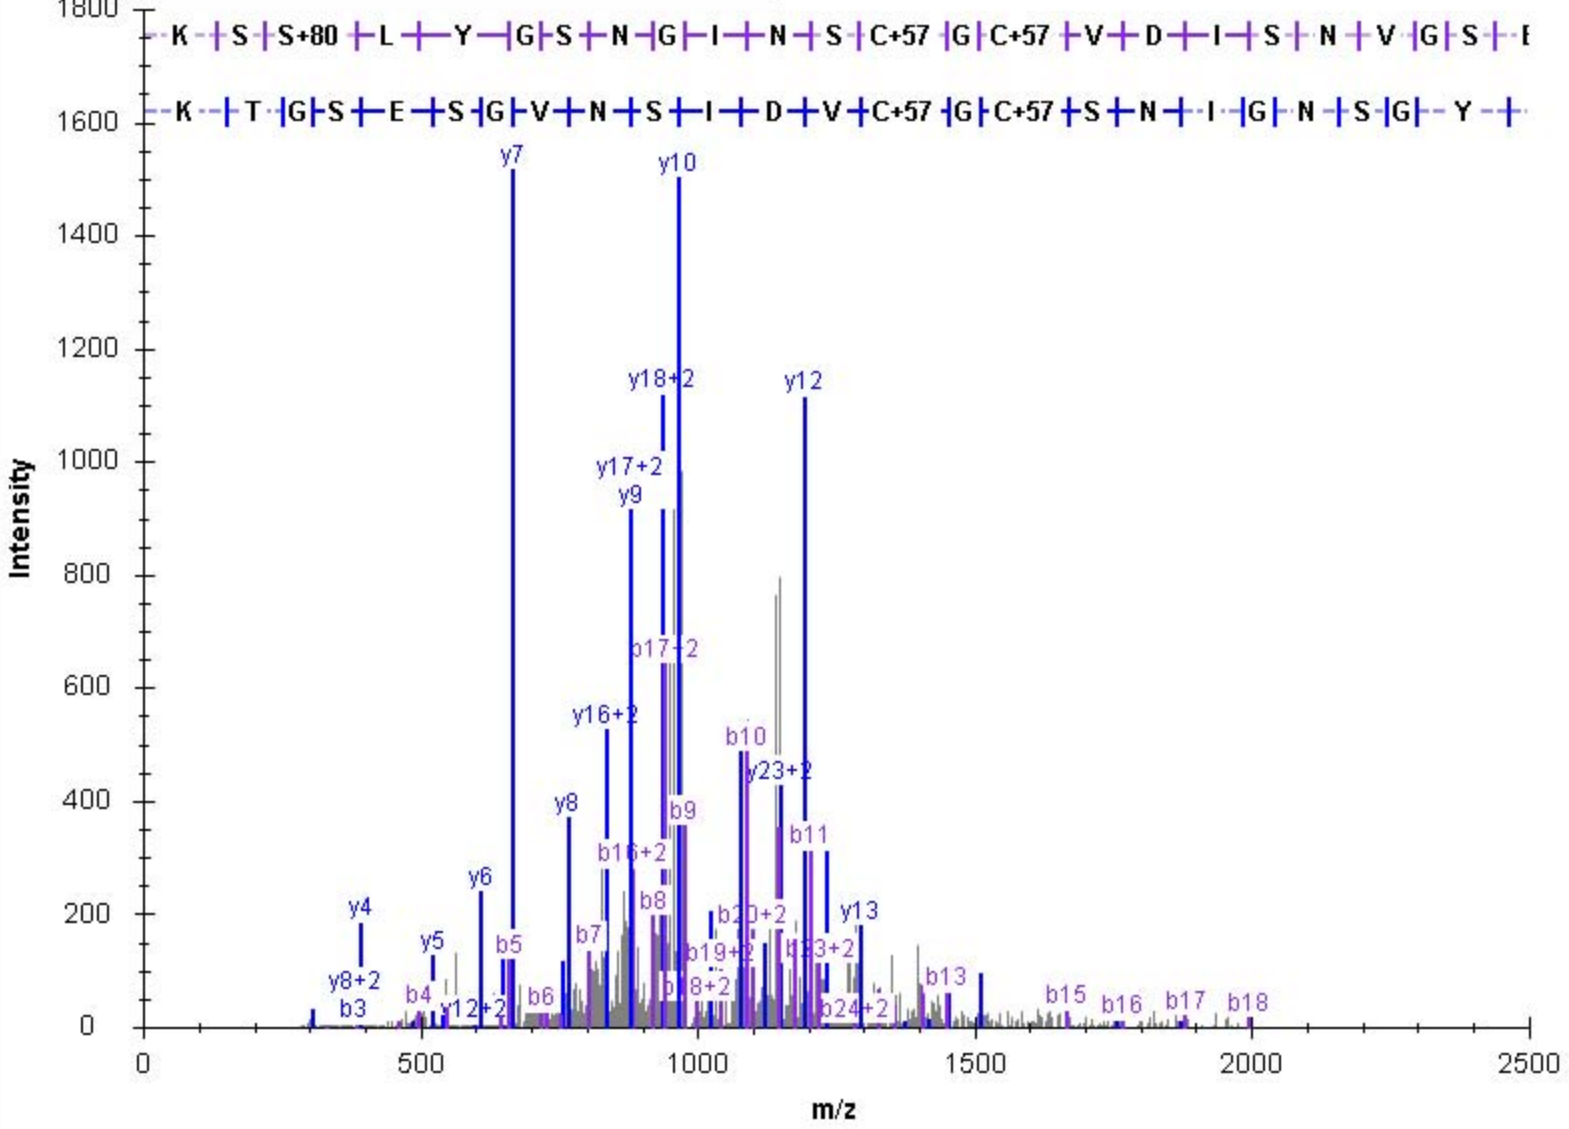

| b               | b(+2)           |    |   | y  | y(+2)           |                 |
|-----------------|-----------------|----|---|----|-----------------|-----------------|
| <b>130.050</b>  | 65.529          | 1  | E | 27 | 3051.540        | 1526.274        |
| 217.082         | 109.045         | 2  | S | 26 | 2922.498        | 1461.753        |
| 330.166         | 165.587         | 3  | I | 25 | 2835.466        | 1418.237        |
| 458.261         | 229.634         | 4  | K | 24 | 2722.382        | <b>1361.695</b> |
| <b>555.314</b>  | 278.160         | 5  | P | 23 | 2594.287        | <b>1297.647</b> |
| <b>686.354</b>  | 343.681         | 6  | M | 22 | 2497.234        | <b>1249.121</b> |
| <b>773.386</b>  | 387.197         | 7  | S | 21 | 2366.194        | <b>1183.600</b> |
| 886.470         | 443.739         | 8  | I | 20 | 2279.162        | 1140.084        |
| <b>983.523</b>  | <b>492.265</b>  | 9  | P | 19 | 2166.077        | <b>1083.542</b> |
| 1070.555        | 535.781         | 10 | S | 18 | 2069.025        | 1035.016        |
| <b>1198.614</b> | <b>599.810</b>  | 11 | Q | 17 | 1981.993        | <b>991.500</b>  |
| 1311.698        | 656.352         | 12 | L | 16 | <b>1853.934</b> | <b>927.471</b>  |
| 1439.793        | 720.400         | 13 | K | 15 | 1740.850        | <b>870.929</b>  |
| 1567.851        | <b>784.429</b>  | 14 | Q | 14 | 1612.755        | 806.881         |
| 1696.894        | <b>848.951</b>  | 15 | E | 13 | <b>1484.697</b> | <b>742.852</b>  |
| 1783.926        | <b>892.467</b>  | 16 | S | 12 | <b>1355.654</b> | <b>678.331</b>  |
| 1882.994        | 942.001         | 17 | V | 11 | <b>1268.622</b> | 634.815         |
| 2012.037        | <b>1006.522</b> | 18 | E | 10 | <b>1169.553</b> | 585.280         |
| 2111.105        | 1056.056        | 19 | V | 9  | <b>1040.511</b> | 520.759         |
| 2198.137        | <b>1099.572</b> | 20 | S | 8  | <b>941.442</b>  | 471.225         |
| 2312.180        | <b>1156.594</b> | 21 | N | 7  | <b>854.410</b>  | <b>427.709</b>  |
| 2425.264        | <b>1213.136</b> | 22 | L | 6  | 740.368         | 370.687         |
| 2512.296        | <b>1256.652</b> | 23 | S | 5  | <b>627.283</b>  | 314.145         |
| 2599.328        | 1300.168        | 24 | S | 4  | <b>540.251</b>  | 270.629         |
| 2780.376        | <b>1390.692</b> | 25 | T | 3  | <b>453.219</b>  | 227.113         |
| 2877.429        | 1439.218        | 26 | P | 2  | 272.172         | 136.589         |
| 3033.530        | <b>1517.269</b> | 27 | R | 1  | 175.119         | 88.063          |

controllerType=0 controllerNumber=1 scan=10550

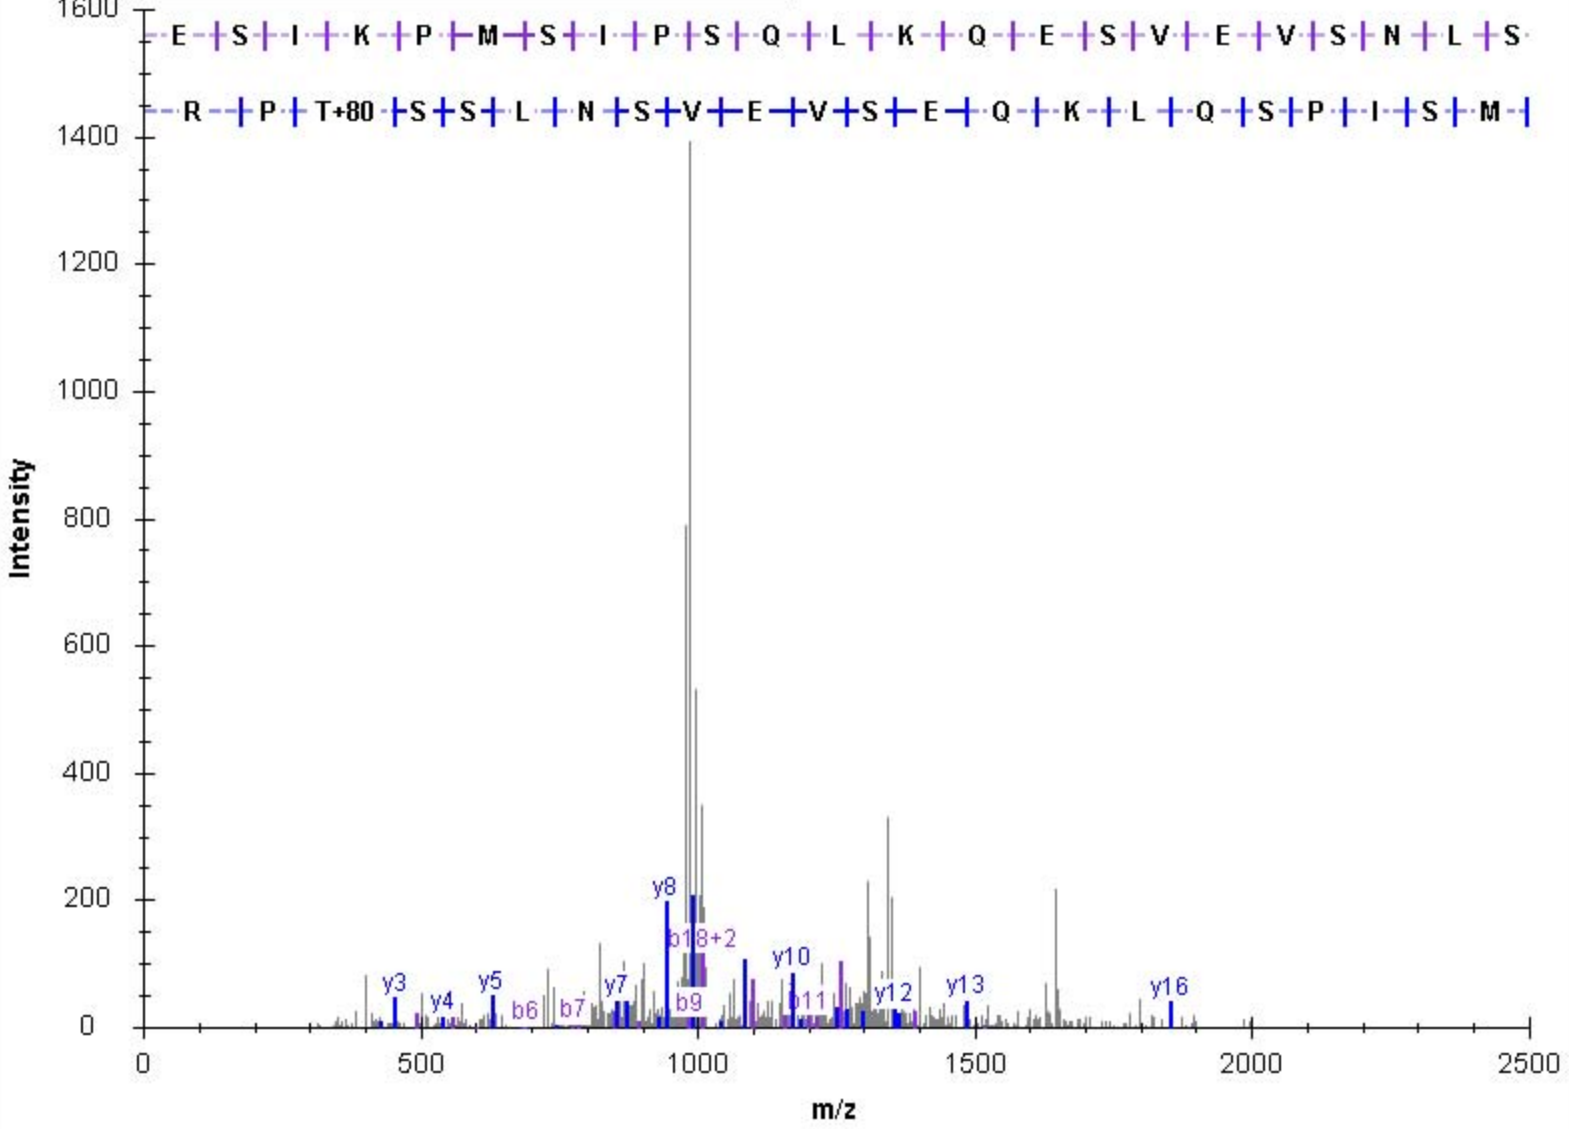



| b               | b(+2)          |    |   |    | y               | y(+2)          |
|-----------------|----------------|----|---|----|-----------------|----------------|
| 129.066         | 65.037         | 1  | Q | 14 | 1612.755        | 806.881        |
| <b>258.108</b>  | 129.558        | 2  | E | 13 | 1484.697        | <b>742.852</b> |
| <b>345.140</b>  | 173.074        | 3  | S | 12 | <b>1355.654</b> | <b>678.331</b> |
| <b>444.209</b>  | 222.608        | 4  | V | 11 | <b>1268.622</b> | <b>634.815</b> |
| <b>573.251</b>  | 287.129        | 5  | E | 10 | <b>1169.553</b> | <b>585.280</b> |
| <b>672.320</b>  | 336.664        | 6  | V | 9  | <b>1040.511</b> | <b>520.759</b> |
| <b>759.352</b>  | <b>380.180</b> | 7  | S | 8  | <b>941.442</b>  | 471.225        |
| <b>873.395</b>  | 437.201        | 8  | N | 7  | <b>854.410</b>  | 427.709        |
| <b>986.479</b>  | 493.743        | 9  | L | 6  | <b>740.368</b>  | 370.687        |
| <b>1073.511</b> | <b>537.259</b> | 10 | S | 5  | <b>627.283</b>  | 314.145        |
| <b>1160.543</b> | <b>580.775</b> | 11 | S | 4  | <b>540.251</b>  | 270.629        |
| <b>1341.591</b> | 671.299        | 12 | T | 3  | <b>453.219</b>  | 227.113        |
| 1438.643        | 719.825        | 13 | P | 2  | <b>272.172</b>  | 136.589        |
| 1594.745        | <b>797.876</b> | 14 | R | 1  | 175.119         | 88.063         |

controllerType=0 controllerNumber=1 scan=6870

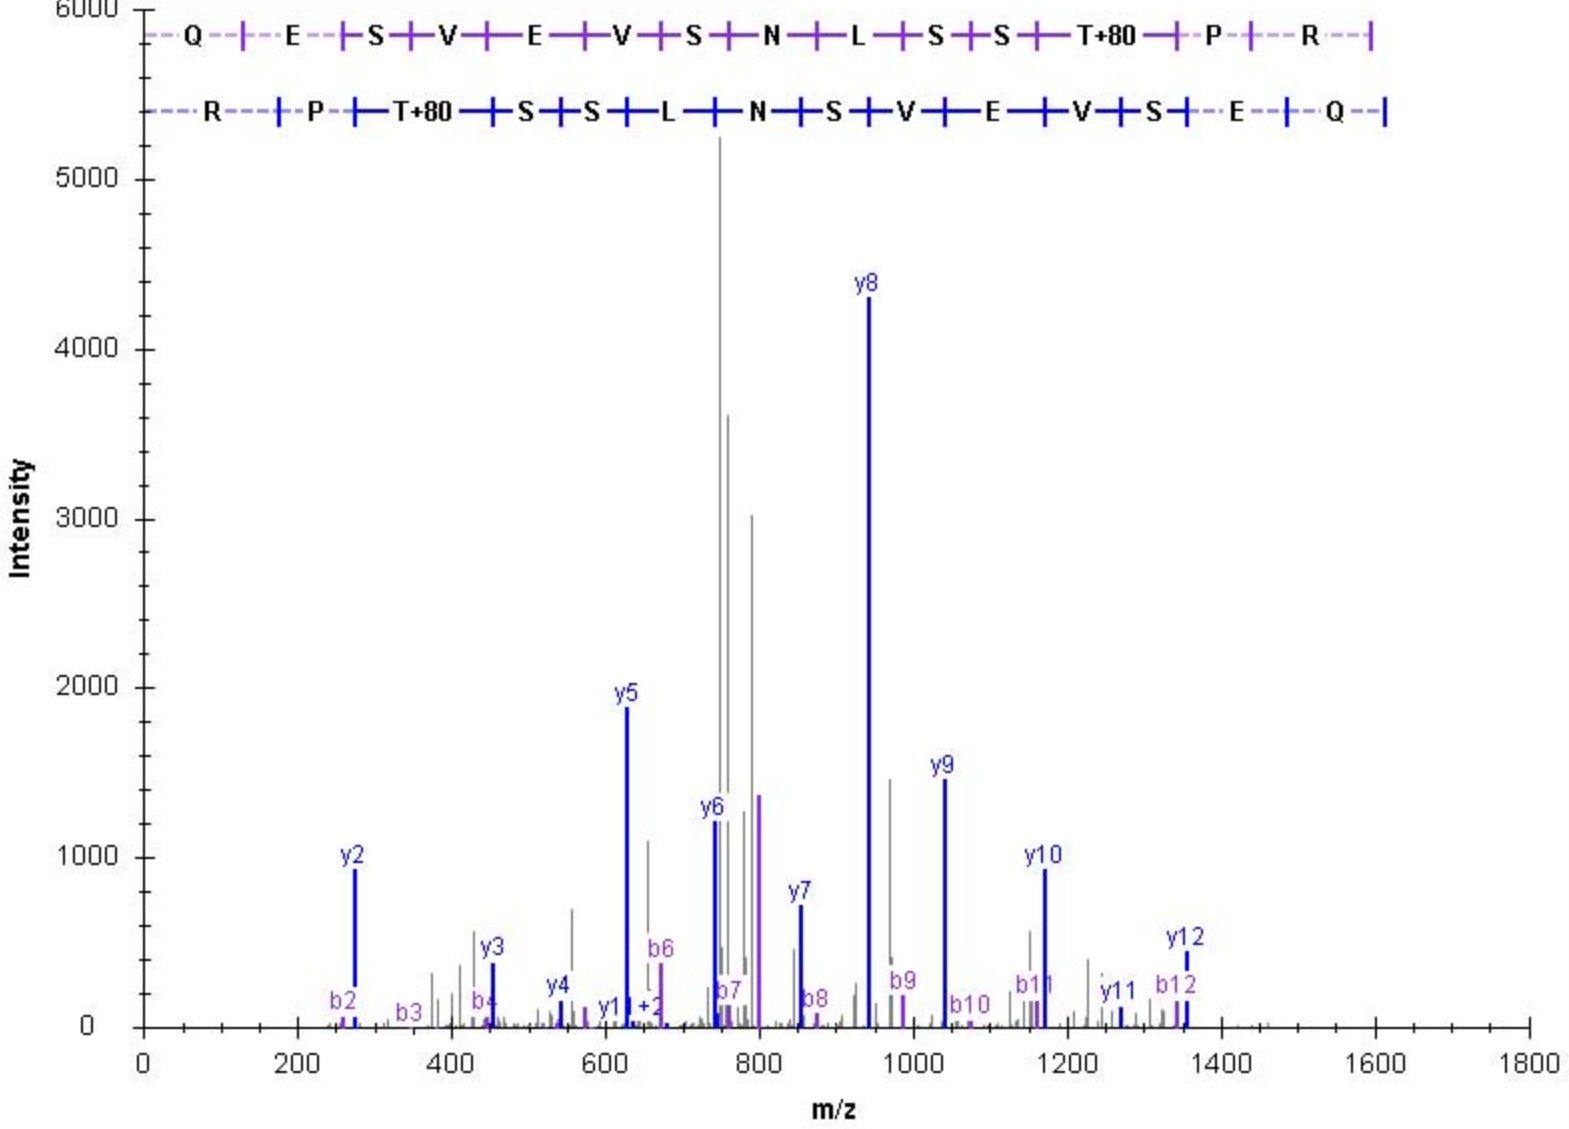

| b              | b(+2)          |    |   |    | y              | y(+2)          |
|----------------|----------------|----|---|----|----------------|----------------|
| <b>88.039</b>  | 44.523         | 1  | S | 13 | 1664.729       | <b>832.868</b> |
| <b>251.103</b> | 126.055        | 2  | Y | 12 | 1577.697       | <b>789.352</b> |
| <b>398.171</b> | <b>199.589</b> | 3  | F | 11 | 1414.634       | <b>707.820</b> |
| <b>513.198</b> | 257.103        | 4  | D | 10 | 1267.565       | <b>634.286</b> |
| <b>669.299</b> | 335.153        | 5  | R | 9  | 1152.538       | <b>576.773</b> |
| <b>798.342</b> | <b>399.674</b> | 6  | E | 8  | 996.437        | <b>498.722</b> |
| 895.394        | <b>448.201</b> | 7  | P | 7  | <b>867.394</b> | <b>434.201</b> |
| 1062.426       | <b>531.717</b> | 8  | S | 6  | <b>770.342</b> | <b>385.674</b> |
| 1175.511       | 588.259        | 9  | L | 5  | <b>603.310</b> | <b>302.158</b> |
| 1290.537       | <b>645.772</b> | 10 | D | 4  | <b>490.226</b> | <b>245.616</b> |
| 1361.575       | <b>681.291</b> | 11 | A | 3  | <b>375.199</b> | 188.103        |
| 1490.617       | <b>745.812</b> | 12 | E | 2  | <b>304.162</b> | 152.584        |
| 1646.718       | <b>823.863</b> | 13 | R | 1  | <b>175.119</b> | 88.063         |

controllerType=0 controllerNumber=1 scan=8715

Intensity (10<sup>3</sup>)

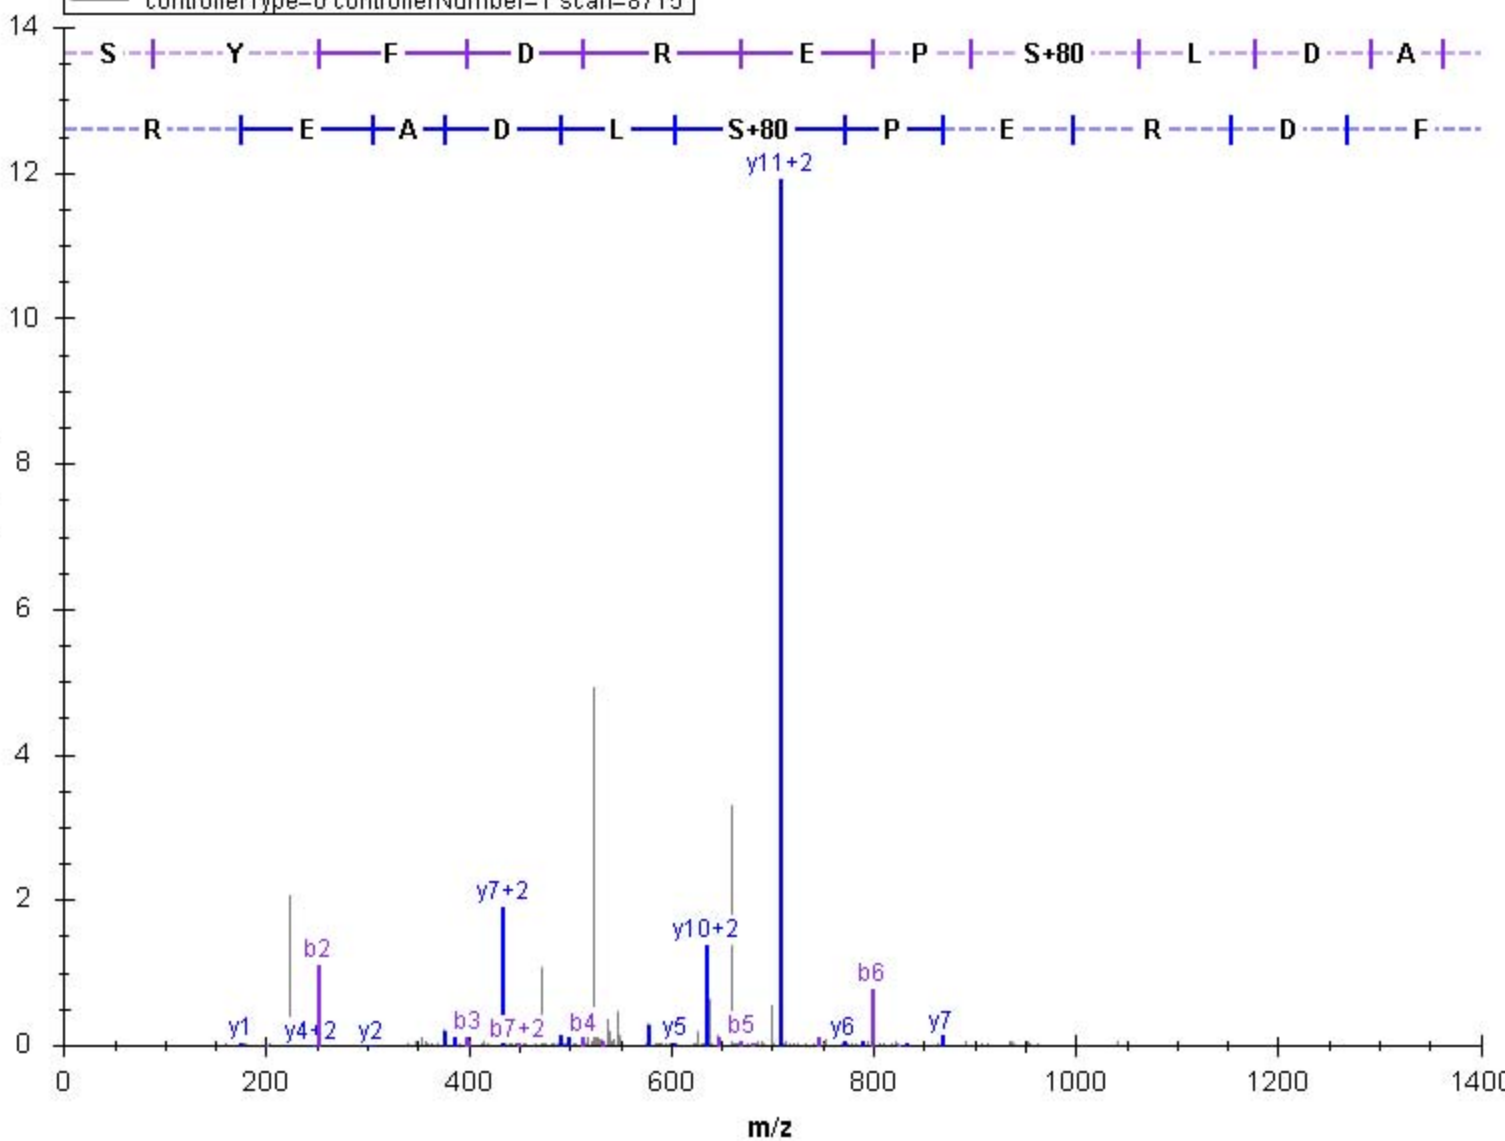

| b               | b(+2)          |    |   |    | y               | y(+2)          |
|-----------------|----------------|----|---|----|-----------------|----------------|
| 88.039          | 44.523         | 1  | S | 13 | 1480.680        | 740.844        |
| <b>216.134</b>  | 108.571        | 2  | K | 12 | 1393.648        | <b>697.328</b> |
| <b>363.203</b>  | 182.105        | 3  | F | 11 | <b>1265.553</b> | <b>633.280</b> |
| <b>510.271</b>  | 255.639        | 4  | F | 10 | <b>1118.485</b> | 559.746        |
| <b>567.293</b>  | 284.150        | 5  | G | 9  | <b>971.417</b>  | 486.212        |
| <b>654.325</b>  | <b>327.666</b> | 6  | S | 8  | <b>914.395</b>  | 457.701        |
| 741.357         | 371.182        | 7  | S | 7  | <b>827.363</b>  | 414.185        |
| <b>869.415</b>  | 435.211        | 8  | Q | 6  | 740.331         | 370.669        |
| <b>956.447</b>  | 478.727        | 9  | S | 5  | <b>612.273</b>  | 306.640        |
| <b>1070.490</b> | 535.749        | 10 | N | 4  | <b>525.241</b>  | 263.124        |
| <b>1237.522</b> | 619.265        | 11 | S | 3  | <b>411.198</b>  | 206.102        |
| 1334.575        | 667.791        | 12 | P | 2  | <b>244.166</b>  | 122.586        |
| 1462.670        | <b>731.839</b> | 13 | K | 1  | 147.113         | 74.060         |

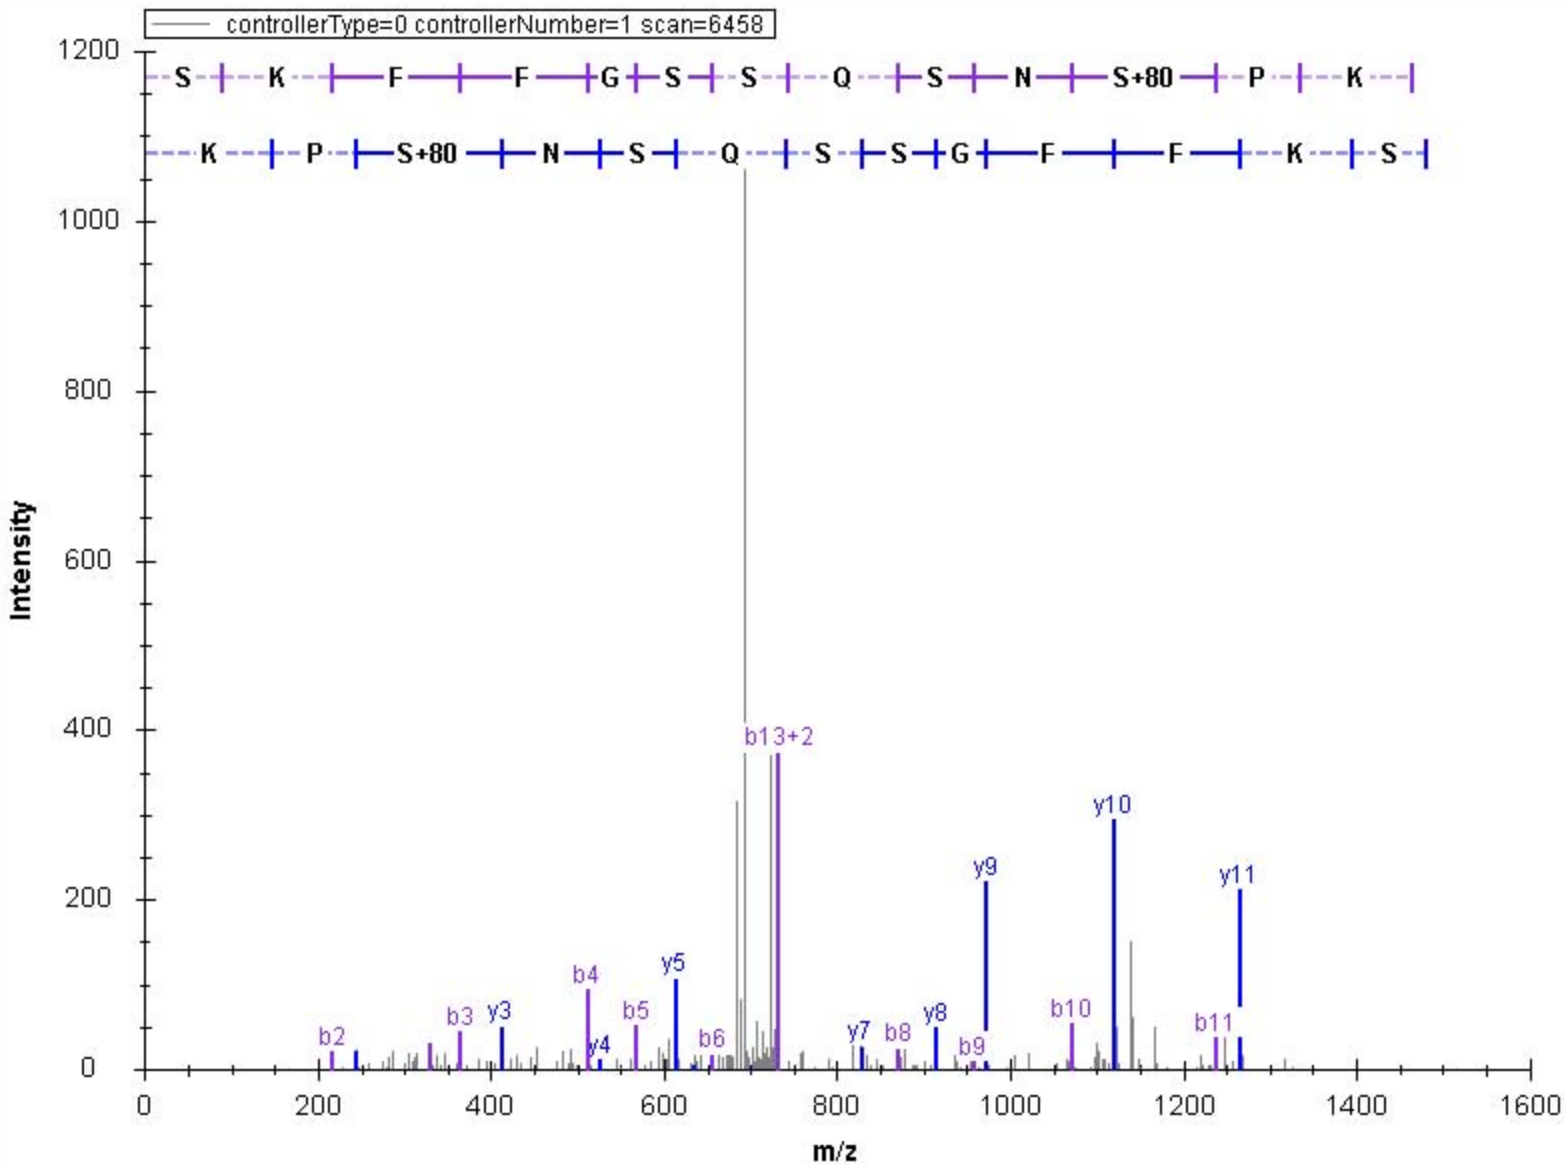

| b               | b(+2)          |    |   |    | y               | y(+2)          |
|-----------------|----------------|----|---|----|-----------------|----------------|
| 148.076         | 74.541         | 1  | F | 11 | 1265.553        | 633.280        |
| <b>295.144</b>  | 148.076        | 2  | F | 10 | <b>1118.485</b> | <b>559.746</b> |
| <b>352.166</b>  | 176.586        | 3  | G | 9  | <b>971.417</b>  | <b>486.212</b> |
| <b>439.198</b>  | 220.102        | 4  | S | 8  | <b>914.395</b>  | <b>457.701</b> |
| <b>526.230</b>  | <b>263.618</b> | 5  | S | 7  | <b>827.363</b>  | <b>414.185</b> |
| <b>654.288</b>  | 327.648        | 6  | Q | 6  | <b>740.331</b>  | <b>370.669</b> |
| <b>741.320</b>  | 371.164        | 7  | S | 5  | <b>612.273</b>  | <b>306.640</b> |
| <b>855.363</b>  | <b>428.185</b> | 8  | N | 4  | <b>525.241</b>  | <b>263.124</b> |
| <b>1022.395</b> | 511.701        | 9  | S | 3  | <b>411.198</b>  | 206.102        |
| <b>1119.448</b> | <b>560.228</b> | 10 | P | 2  | <b>244.166</b>  | 122.586        |
| 1247.543        | <b>624.275</b> | 11 | K | 1  | 147.113         | 74.060         |

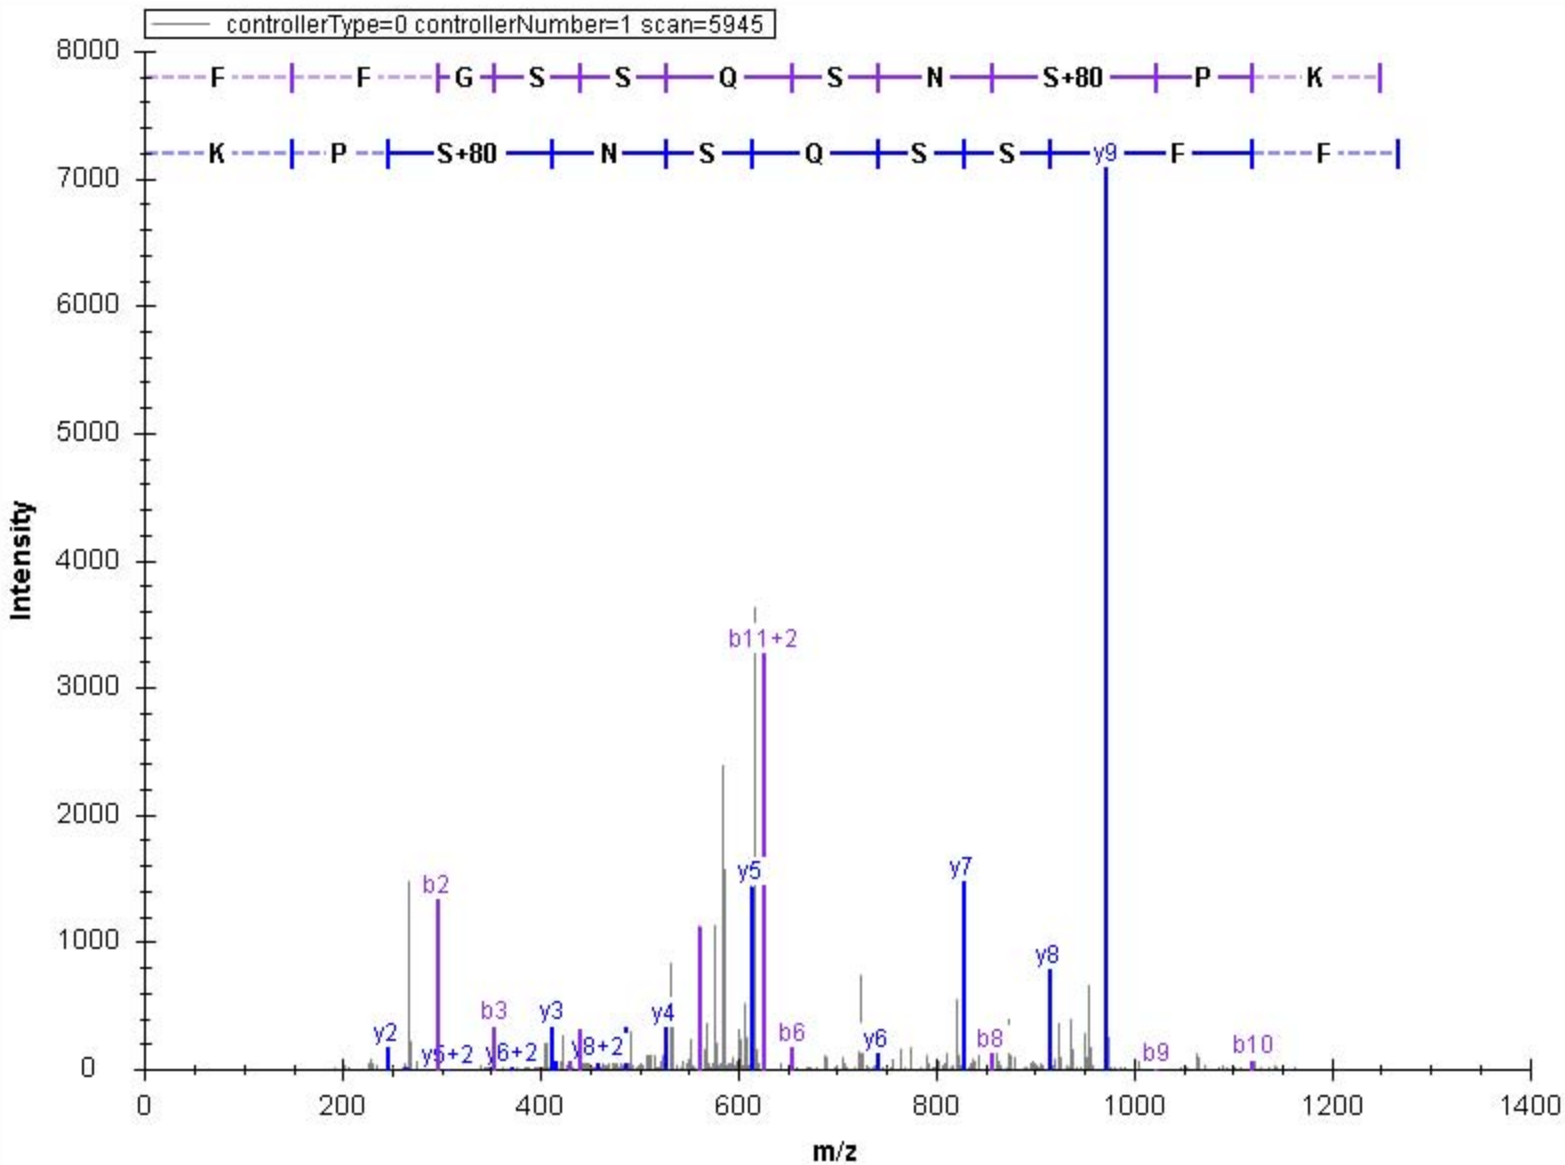



| b               | b(+2)          |    |   |    | y               | y(+2)          |
|-----------------|----------------|----|---|----|-----------------|----------------|
| <b>148.076</b>  | 74.541         | 1  | F | 16 | 1913.850        | <b>957.429</b> |
| <b>295.144</b>  | 148.076        | 2  | F | 15 | 1766.782        | <b>883.895</b> |
| <b>352.166</b>  | 176.586        | 3  | G | 14 | 1619.714        | <b>810.360</b> |
| <b>439.198</b>  | 220.102        | 4  | S | 13 | 1562.692        | <b>781.850</b> |
| <b>526.230</b>  | 263.618        | 5  | S | 12 | 1475.660        | <b>738.334</b> |
| <b>654.288</b>  | 327.648        | 6  | Q | 11 | 1388.628        | <b>694.818</b> |
| <b>821.320</b>  | 411.164        | 7  | S | 10 | 1260.569        | <b>630.788</b> |
| <b>935.363</b>  | 468.185        | 8  | N | 9  | <b>1093.537</b> | <b>547.272</b> |
| <b>1102.395</b> | <b>551.701</b> | 9  | S | 8  | <b>979.495</b>  | <b>490.251</b> |
| <b>1199.448</b> | <b>600.228</b> | 10 | P | 7  | <b>812.462</b>  | <b>406.735</b> |
| 1327.543        | <b>664.275</b> | 11 | K | 6  | <b>715.410</b>  | <b>358.208</b> |
| 1442.570        | <b>721.789</b> | 12 | D | 5  | <b>587.315</b>  | 294.161        |
| 1529.602        | 765.305        | 13 | S | 4  | <b>472.288</b>  | 236.648        |
| 1626.655        | <b>813.831</b> | 14 | P | 3  | <b>385.256</b>  | 193.132        |
| 1739.739        | <b>870.373</b> | 15 | L | 2  | 288.203         | 144.605        |
| 1895.840        | <b>948.424</b> | 16 | R | 1  | 175.119         | 88.063         |

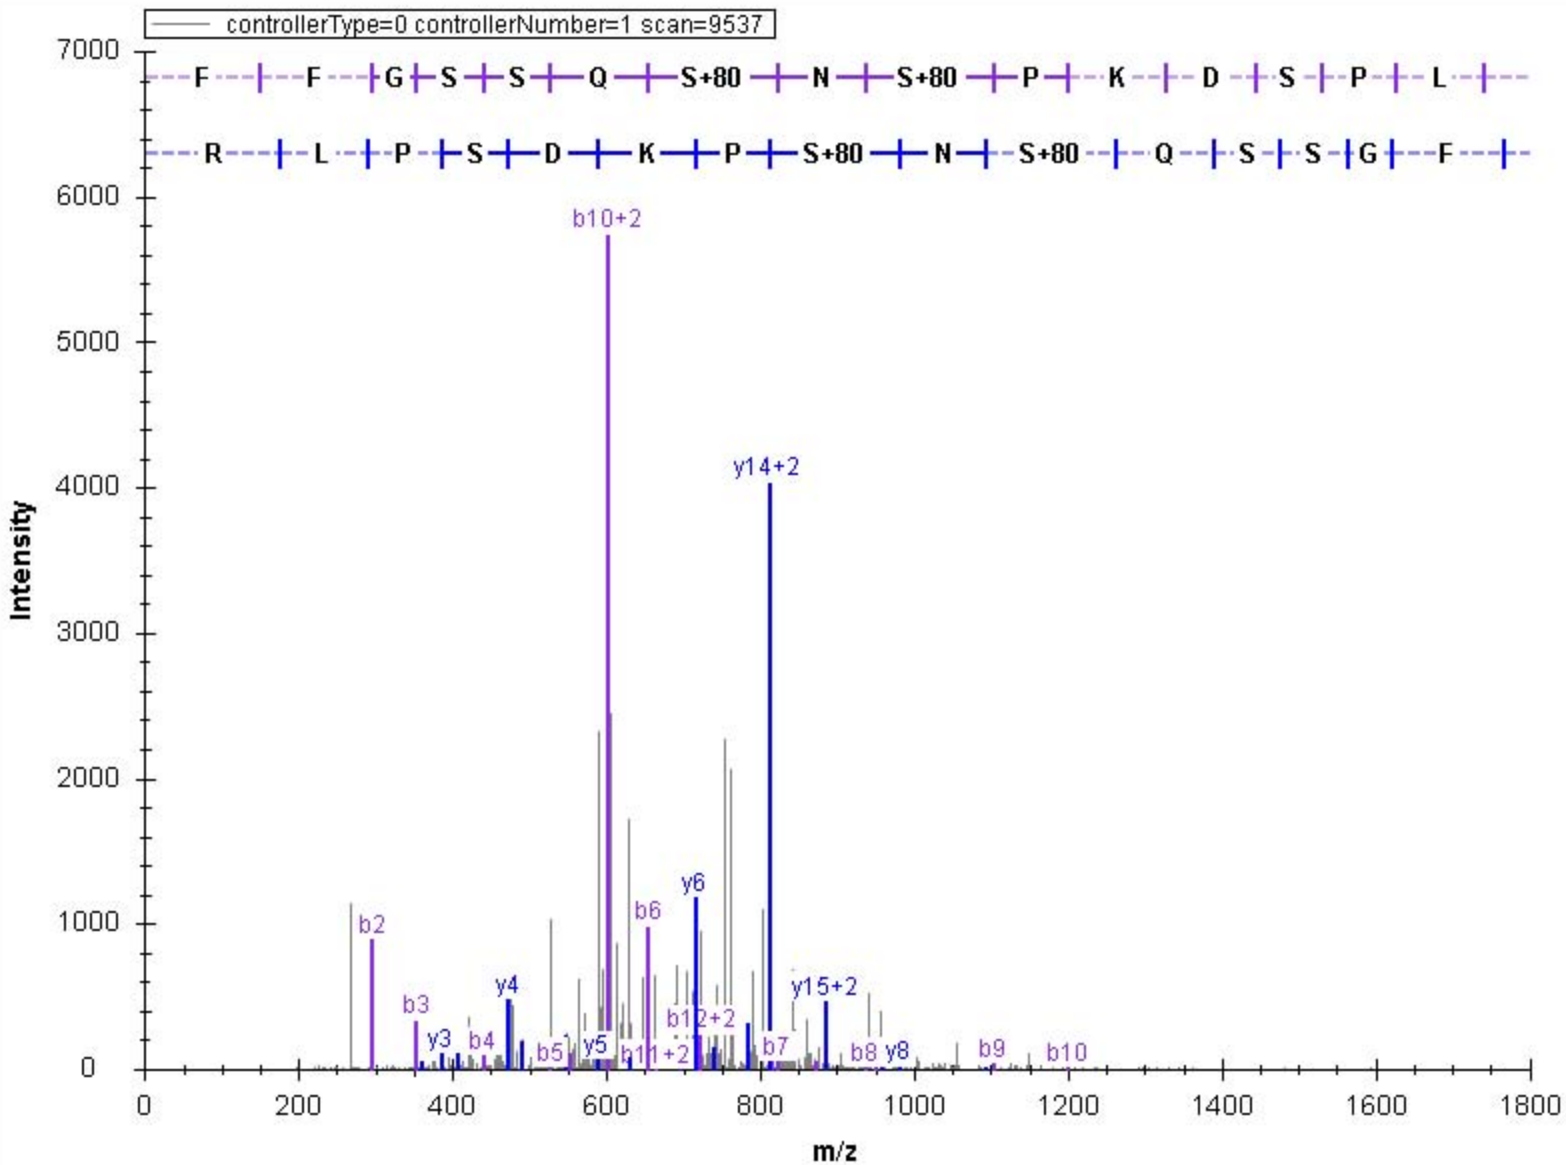

| b               | b(+2)          |    |   |    | y               | y(+2)          |
|-----------------|----------------|----|---|----|-----------------|----------------|
| 148.076         | 74.541         | 1  | F | 16 | 1833.850        | 917.429        |
| <b>295.144</b>  | 148.076        | 2  | F | 15 | 1686.782        | <b>843.895</b> |
| <b>352.166</b>  | 176.586        | 3  | G | 14 | 1539.714        | <b>770.360</b> |
| 439.198         | 220.102        | 4  | S | 13 | 1482.692        | <b>741.850</b> |
| <b>526.230</b>  | <b>263.618</b> | 5  | S | 12 | <b>1395.660</b> | <b>698.334</b> |
| <b>654.288</b>  | 327.648        | 6  | Q | 11 | <b>1308.628</b> | <b>654.818</b> |
| 741.320         | <b>371.164</b> | 7  | S | 10 | <b>1180.569</b> | <b>590.788</b> |
| <b>855.363</b>  | <b>428.185</b> | 8  | N | 9  | <b>1093.537</b> | <b>547.272</b> |
| <b>1022.395</b> | 511.701        | 9  | S | 8  | <b>979.495</b>  | <b>490.251</b> |
| <b>1119.448</b> | <b>560.228</b> | 10 | P | 7  | <b>812.462</b>  | 406.735        |
| <b>1247.543</b> | <b>624.275</b> | 11 | K | 6  | <b>715.410</b>  | <b>358.208</b> |
| <b>1362.570</b> | 681.789        | 12 | D | 5  | <b>587.315</b>  | 294.161        |
| <b>1449.602</b> | 725.305        | 13 | S | 4  | <b>472.288</b>  | 236.648        |
| 1546.655        | <b>773.831</b> | 14 | P | 3  | <b>385.256</b>  | 193.132        |
| <b>1659.739</b> | 830.373        | 15 | L | 2  | <b>288.203</b>  | 144.605        |
| 1815.840        | <b>908.424</b> | 16 | R | 1  | 175.119         | 88.063         |

controllerType=0 controllerNumber=1 scan=8728

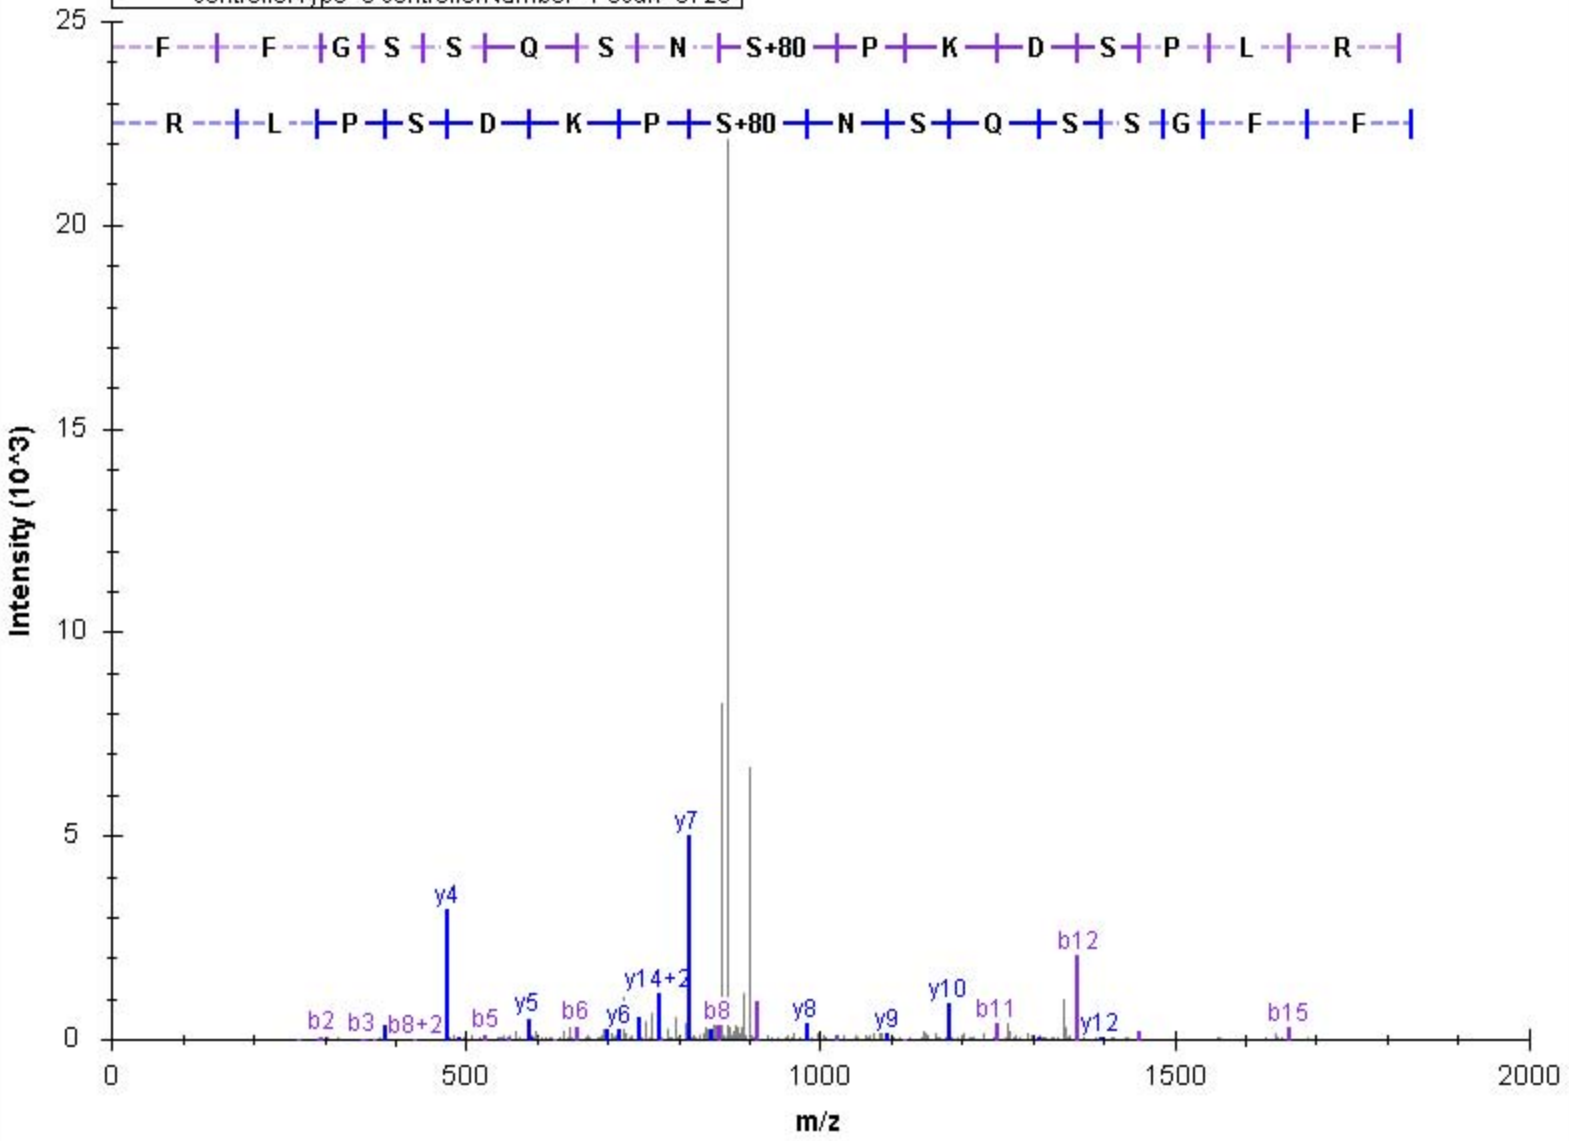

| b               | b(+2)           |    |   |    | y               | y(+2)           |
|-----------------|-----------------|----|---|----|-----------------|-----------------|
| 148.076         | 74.541          | 1  | F | 20 | 2395.079        | 1198.043        |
| <b>295.144</b>  | 148.076         | 2  | F | 19 | 2248.010        | 1124.509        |
| <b>352.166</b>  | 176.586         | 3  | G | 18 | 2100.942        | <b>1050.975</b> |
| <b>439.198</b>  | 220.102         | 4  | S | 17 | 2043.921        | <b>1022.464</b> |
| <b>526.230</b>  | 263.618         | 5  | S | 16 | 1956.889        | <b>978.948</b>  |
| <b>654.288</b>  | 327.648         | 6  | Q | 15 | 1869.857        | <b>935.432</b>  |
| <b>821.320</b>  | <b>411.164</b>  | 7  | S | 14 | 1741.798        | <b>871.403</b>  |
| <b>935.363</b>  | <b>468.185</b>  | 8  | N | 13 | 1574.766        | 787.887         |
| <b>1022.395</b> | 511.701         | 9  | S | 12 | 1460.723        | <b>730.865</b>  |
| 1119.448        | <b>560.228</b>  | 10 | P | 11 | <b>1373.691</b> | <b>687.349</b>  |
| <b>1247.543</b> | <b>624.275</b>  | 11 | K | 10 | <b>1276.638</b> | <b>638.823</b>  |
| <b>1362.570</b> | 681.789         | 12 | D | 9  | <b>1148.543</b> | <b>574.775</b>  |
| <b>1529.602</b> | 765.305         | 13 | S | 8  | <b>1033.516</b> | <b>517.262</b>  |
| 1626.655        | <b>813.831</b>  | 14 | P | 7  | <b>866.484</b>  | <b>433.746</b>  |
| <b>1739.739</b> | <b>870.373</b>  | 15 | L | 6  | <b>769.432</b>  | <b>385.219</b>  |
| 1895.840        | <b>948.424</b>  | 16 | R | 5  | <b>656.347</b>  | <b>328.677</b>  |
| 2010.867        | <b>1005.937</b> | 17 | D | 4  | <b>500.246</b>  | 250.627         |
| 2111.914        | <b>1056.461</b> | 18 | T | 3  | <b>385.219</b>  | 193.113         |
| 2248.973        | <b>1124.990</b> | 19 | H | 2  | 284.172         | 142.589         |
| 2377.068        | 1189.038        | 20 | K | 1  | 147.113         | 74.060          |

controllerType=0 controllerNumber=1 scan=7018

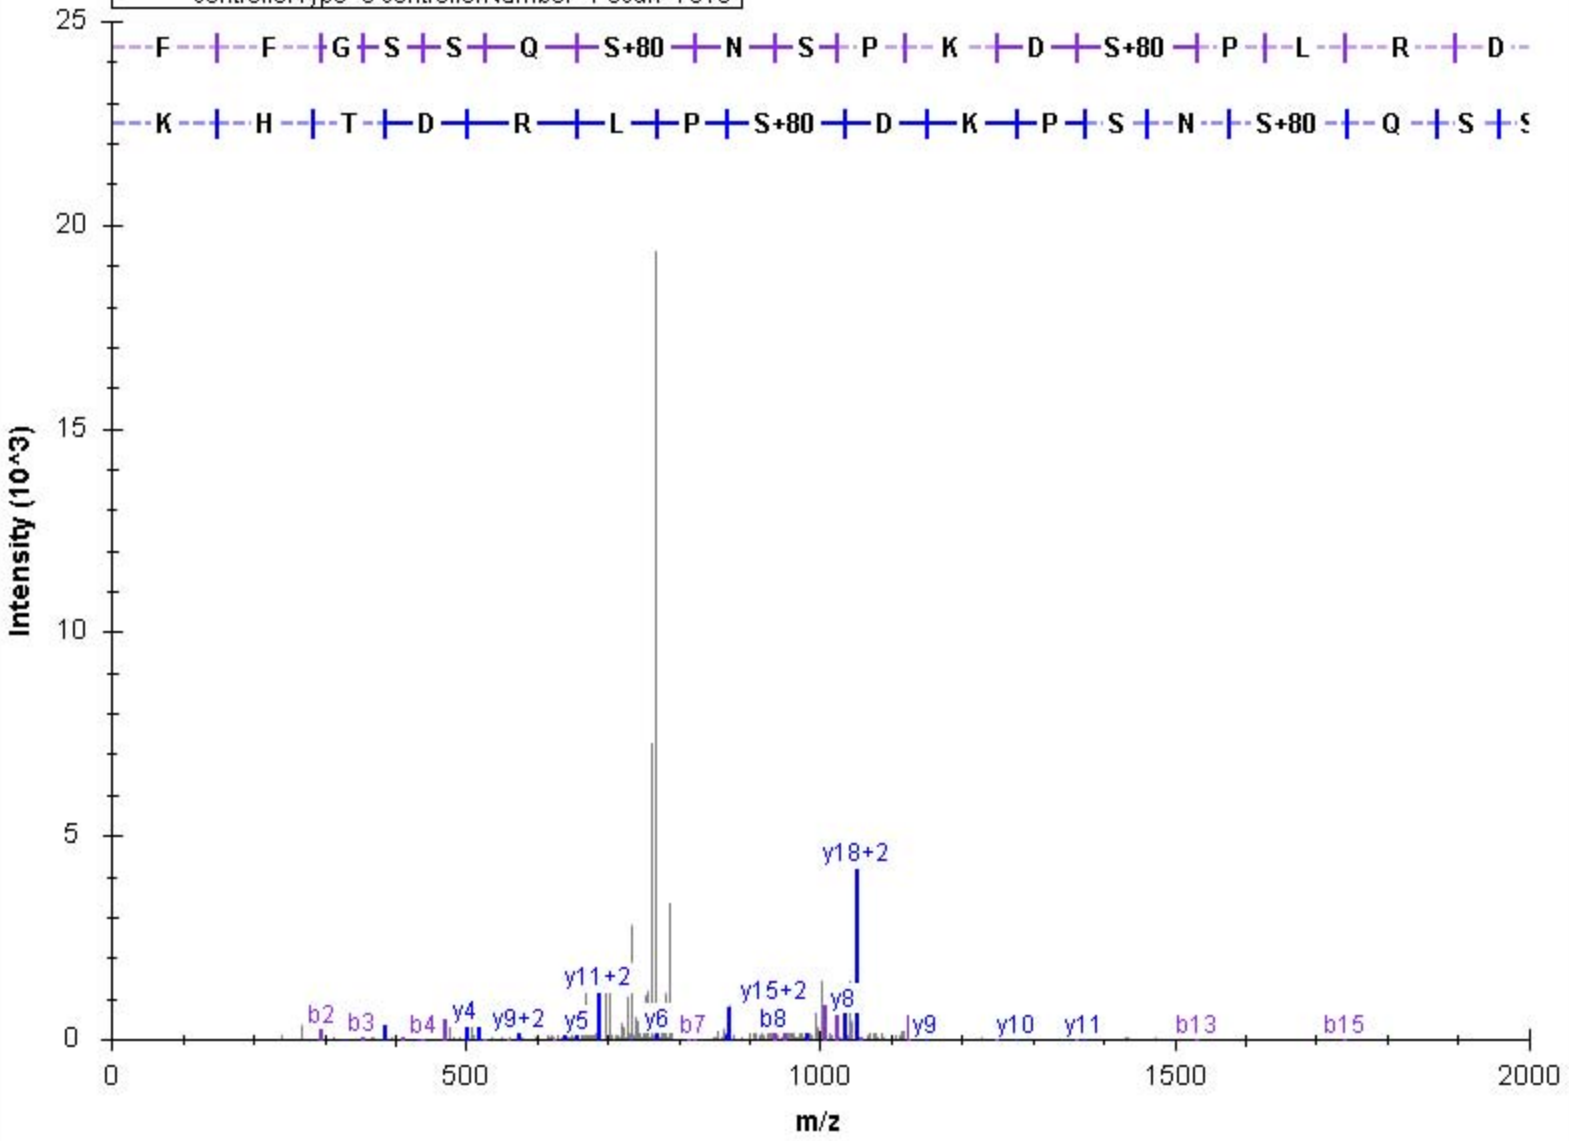

| b               | b(+2)           |    |   | y  | y(+2)           |                 |
|-----------------|-----------------|----|---|----|-----------------|-----------------|
| 148.076         | 74.541          | 1  | F | 20 | 2395.079        | 1198.043        |
| <b>295.144</b>  | 148.076         | 2  | F | 19 | 2248.010        | <b>1124.509</b> |
| <b>352.166</b>  | 176.586         | 3  | G | 18 | 2100.942        | <b>1050.975</b> |
| <b>439.198</b>  | 220.102         | 4  | S | 17 | 2043.921        | <b>1022.464</b> |
| <b>526.230</b>  | 263.618         | 5  | S | 16 | 1956.889        | <b>978.948</b>  |
| <b>654.288</b>  | 327.648         | 6  | Q | 15 | 1869.857        | <b>935.432</b>  |
| <b>741.320</b>  | 371.164         | 7  | S | 14 | 1741.798        | <b>871.403</b>  |
| <b>855.363</b>  | 428.185         | 8  | N | 13 | 1654.766        | <b>827.887</b>  |
| <b>1022.395</b> | 511.701         | 9  | S | 12 | <b>1540.723</b> | <b>770.865</b>  |
| 1119.448        | <b>560.228</b>  | 10 | P | 11 | <b>1373.691</b> | <b>687.349</b>  |
| <b>1247.543</b> | <b>624.275</b>  | 11 | K | 10 | <b>1276.638</b> | <b>638.823</b>  |
| <b>1362.570</b> | <b>681.789</b>  | 12 | D | 9  | <b>1148.543</b> | <b>574.775</b>  |
| <b>1529.602</b> | <b>765.305</b>  | 13 | S | 8  | <b>1033.516</b> | <b>517.262</b>  |
| <b>1626.655</b> | <b>813.831</b>  | 14 | P | 7  | <b>866.484</b>  | <b>433.746</b>  |
| 1739.739        | 870.373         | 15 | L | 6  | <b>769.432</b>  | <b>385.219</b>  |
| 1895.840        | <b>948.424</b>  | 16 | R | 5  | <b>656.347</b>  | 328.677         |
| 2010.867        | <b>1005.937</b> | 17 | D | 4  | <b>500.246</b>  | 250.627         |
| 2111.914        | <b>1056.461</b> | 18 | T | 3  | <b>385.219</b>  | 193.113         |
| 2248.973        | <b>1124.990</b> | 19 | H | 2  | <b>284.172</b>  | 142.589         |
| 2377.068        | 1189.038        | 20 | K | 1  | 147.113         | 74.060          |

controllerType=0 controllerNumber=1 scan=7026

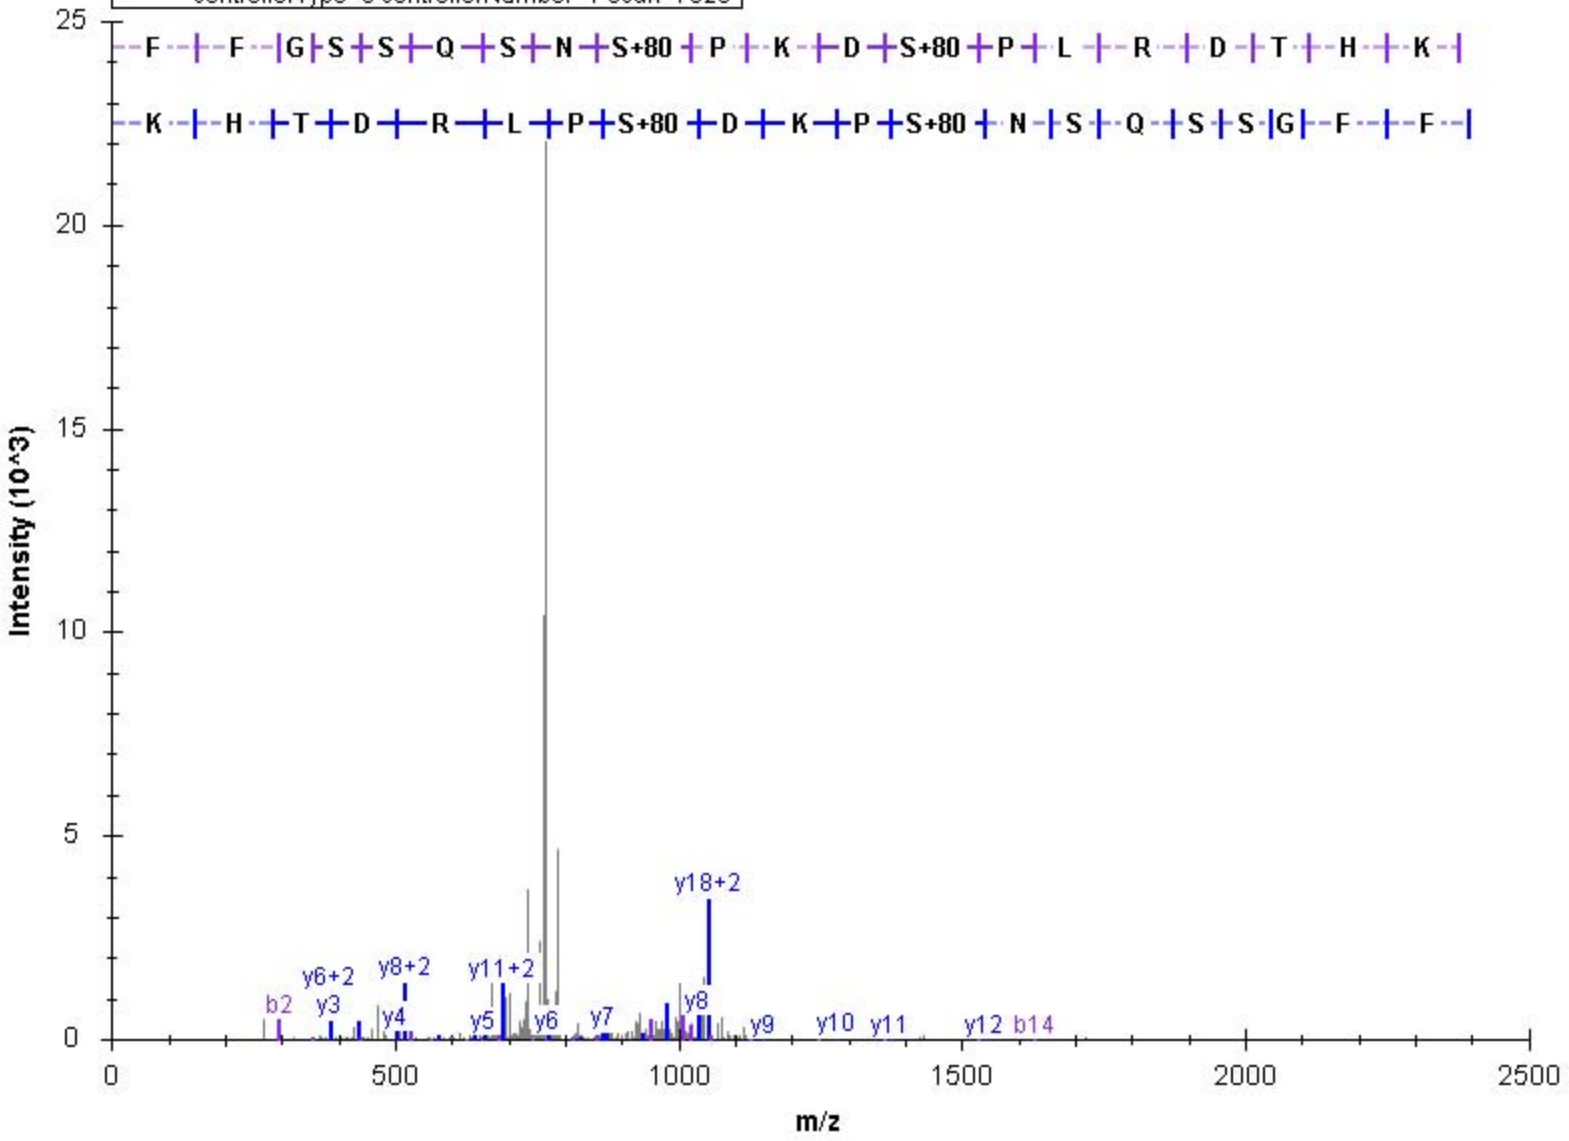



| b               | b(+2)          |    |   |    | y               | y(+2)          |
|-----------------|----------------|----|---|----|-----------------|----------------|
| 129.102         | 65.055         | 1  | K | 14 | 1563.805        | 782.406        |
| 186.124         | 93.565         | 2  | G | 13 | <b>1435.710</b> | <b>718.359</b> |
| <b>300.167</b>  | 150.587        | 3  | N | 12 | <b>1378.689</b> | <b>689.848</b> |
| <b>399.235</b>  | 200.121        | 4  | V | 11 | <b>1264.646</b> | <b>632.826</b> |
| <b>513.278</b>  | 257.143        | 5  | N | 10 | <b>1165.577</b> | <b>583.292</b> |
| <b>644.318</b>  | 322.663        | 6  | M | 9  | <b>1051.534</b> | <b>526.271</b> |
| 741.371         | <b>371.189</b> | 7  | P | 8  | <b>920.494</b>  | 460.751        |
| <b>828.403</b>  | <b>414.705</b> | 8  | S | 7  | 823.441         | 412.224        |
| <b>899.440</b>  | 450.224        | 9  | A | 6  | 736.409         | 368.708        |
| <b>1012.524</b> | 506.766        | 10 | L | 5  | <b>665.372</b>  | 333.190        |
| <b>1179.556</b> | 590.282        | 11 | S | 4  | <b>552.288</b>  | 276.648        |
| 1276.609        | <b>638.808</b> | 12 | P | 3  | <b>385.256</b>  | 193.132        |
| <b>1389.693</b> | 695.350        | 13 | L | 2  | <b>288.203</b>  | 144.605        |
| 1545.794        | 773.401        | 14 | R | 1  | 175.119         | 88.063         |

controllerType=0 controllerNumber=1 scan=8263

Intensity (10<sup>3</sup>)

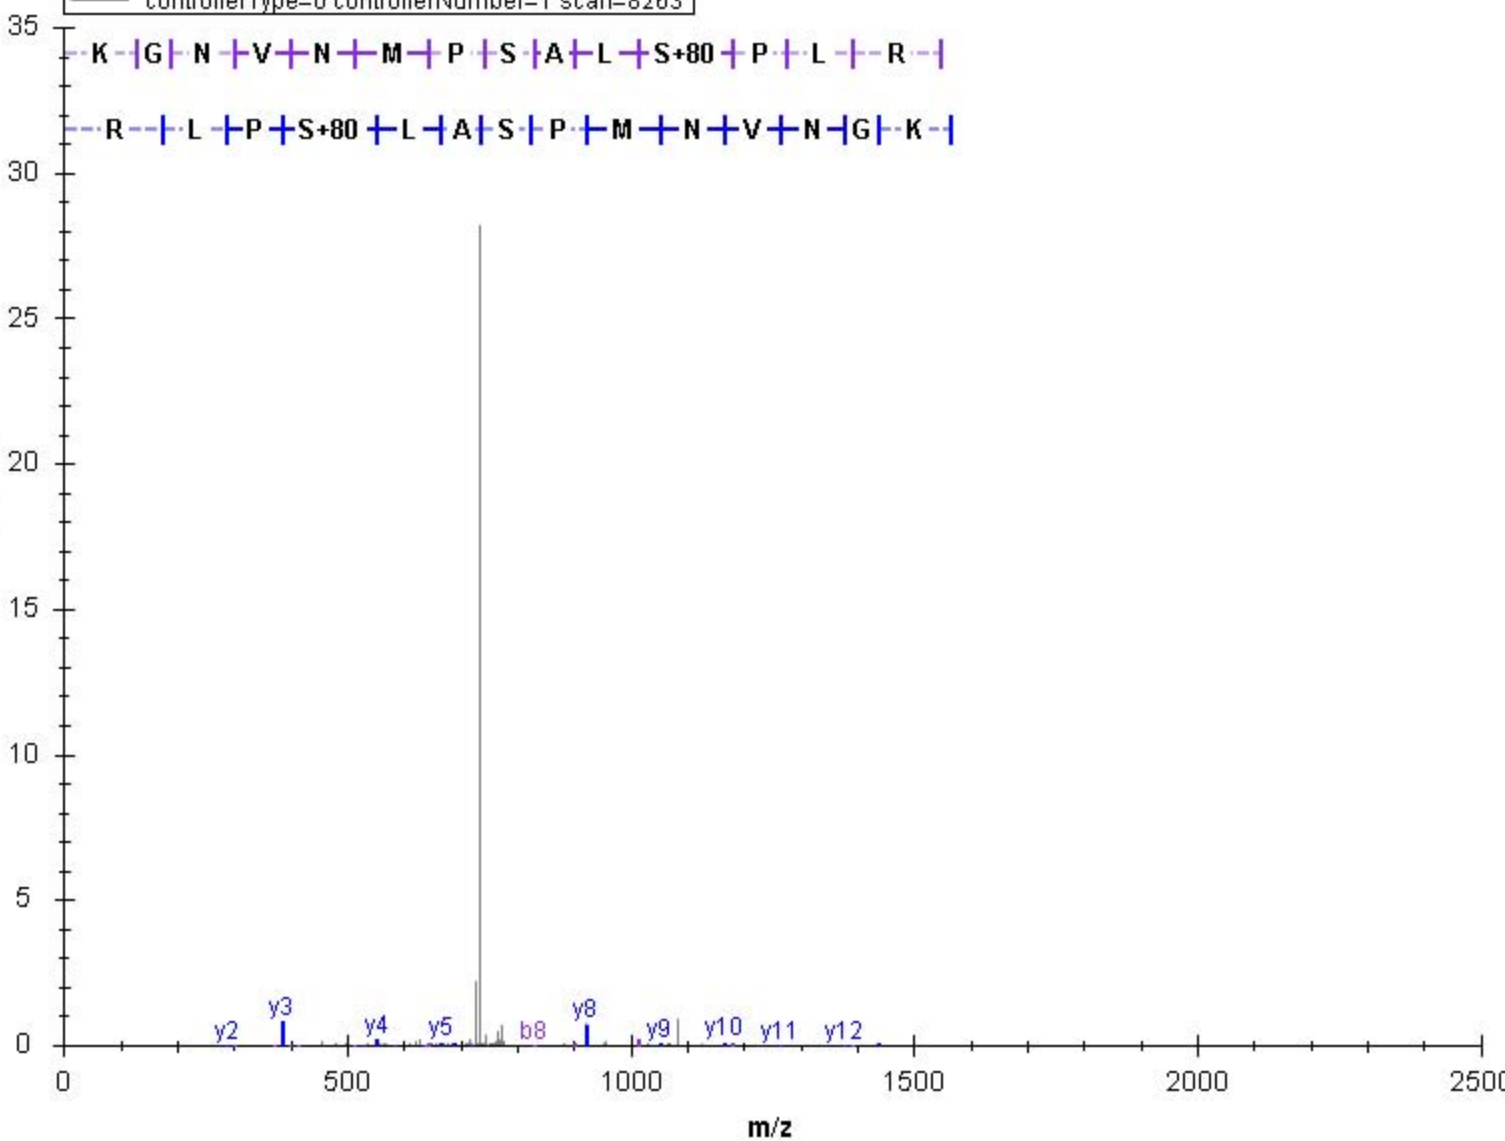

K-G-N-V-N-M-P-S-A-L-S+80-P-L-R

R-L-P-S+80-L-A-S-P-M-N-V-N-G-K

y2

y3

y4

y5

b8

y8

y9

y10

y11

y12

m/z

| b               | b(+2)          |    |   |    | y               | y(+2)          |
|-----------------|----------------|----|---|----|-----------------|----------------|
| 58.029          | 29.518         | 1  | G | 13 | 1435.710        | 718.359        |
| 172.072         | 86.539         | 2  | N | 12 | 1378.689        | 689.848        |
| <b>271.140</b>  | 136.074        | 3  | V | 11 | <b>1264.646</b> | <b>632.826</b> |
| <b>385.183</b>  | 193.095        | 4  | N | 10 | <b>1165.577</b> | <b>583.292</b> |
| <b>516.223</b>  | 258.615        | 5  | M | 9  | <b>1051.534</b> | <b>526.271</b> |
| <b>613.276</b>  | 307.142        | 6  | P | 8  | <b>920.494</b>  | <b>460.751</b> |
| <b>700.308</b>  | <b>350.658</b> | 7  | S | 7  | <b>823.441</b>  | <b>412.224</b> |
| <b>771.345</b>  | <b>386.176</b> | 8  | A | 6  | <b>736.409</b>  | <b>368.708</b> |
| <b>884.429</b>  | 442.718        | 9  | L | 5  | <b>665.372</b>  | <b>333.190</b> |
| <b>1051.461</b> | <b>526.234</b> | 10 | S | 4  | <b>552.288</b>  | <b>276.648</b> |
| <b>1148.514</b> | <b>574.761</b> | 11 | P | 3  | <b>385.256</b>  | 193.132        |
| <b>1261.598</b> | 631.303        | 12 | L | 2  | <b>288.203</b>  | 144.605        |
| 1417.699        | <b>709.353</b> | 13 | R | 1  | 175.119         | 88.063         |

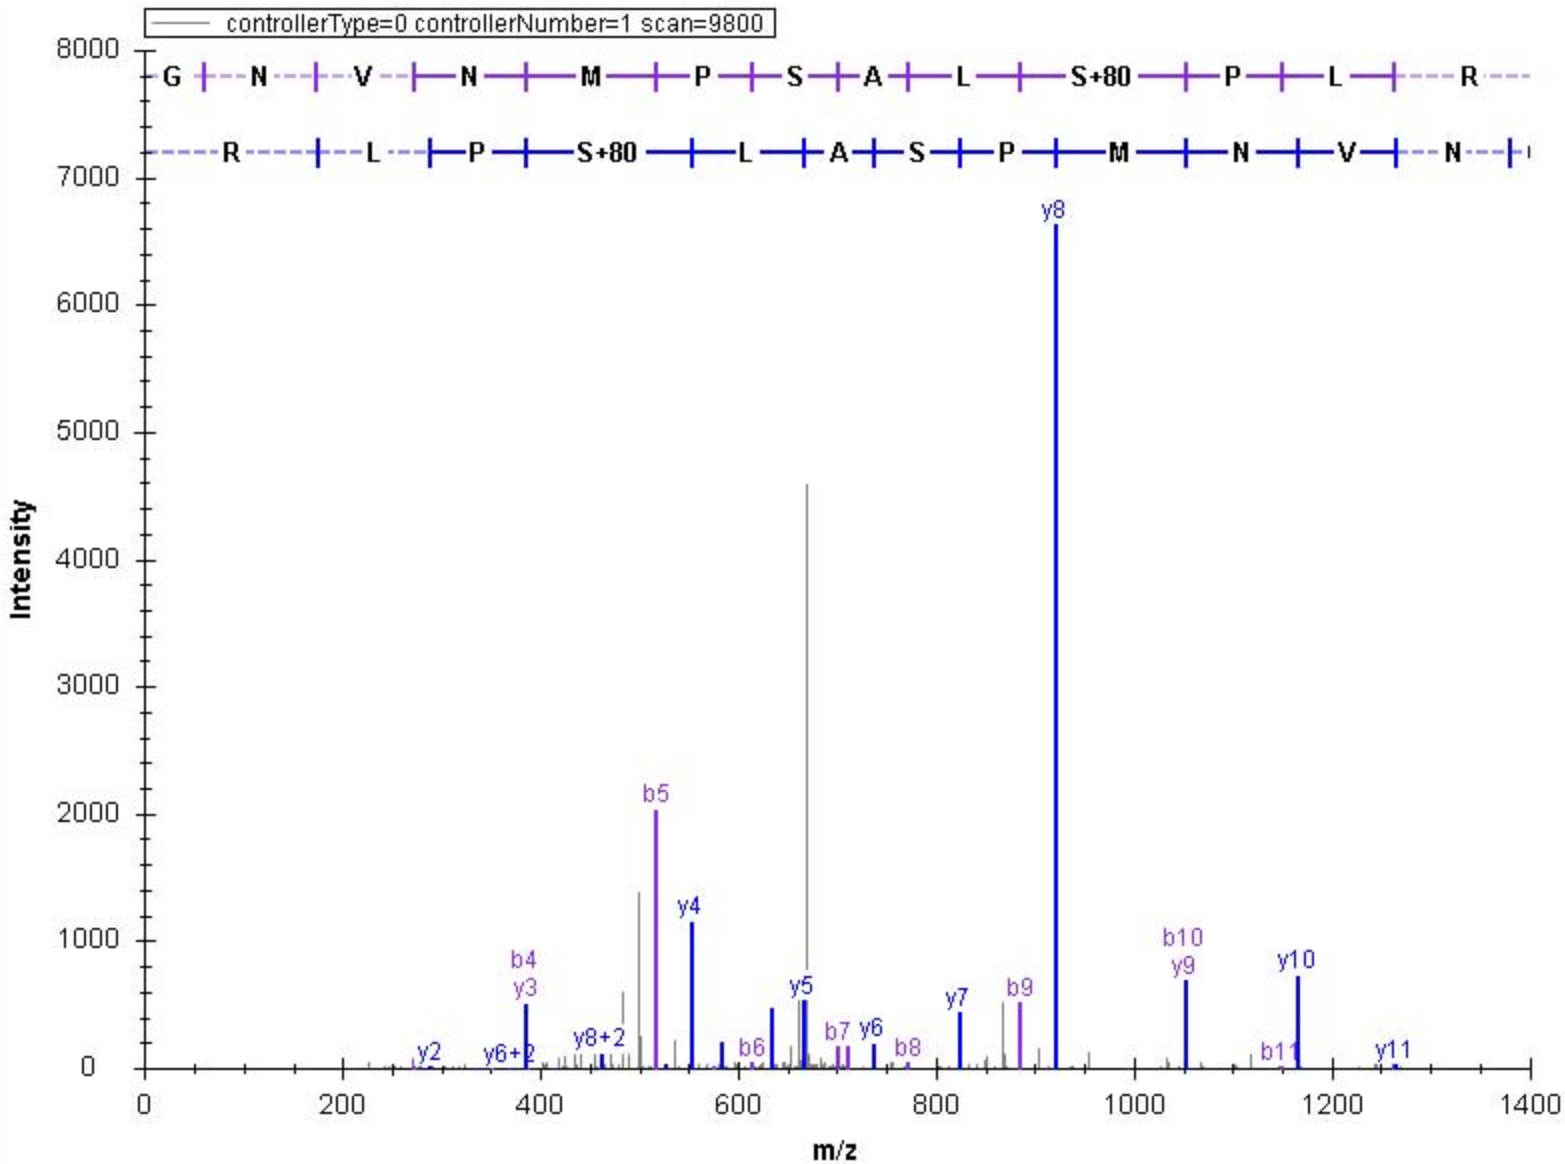

| b               | b(+2)          |    |   |    | y               | y(+2)          |
|-----------------|----------------|----|---|----|-----------------|----------------|
| <b>115.050</b>  | 58.029         | 1  | N | 16 | 1855.987        | 928.497        |
| <b>271.151</b>  | 136.079        | 2  | R | 15 | 1741.945        | 871.476        |
| <b>399.246</b>  | 200.127        | 3  | K | 14 | 1585.843        | <b>793.425</b> |
| <b>496.299</b>  | <b>248.653</b> | 4  | P | 13 | 1457.748        | <b>729.378</b> |
| <b>633.358</b>  | <b>317.183</b> | 5  | H | 12 | 1360.696        | <b>680.852</b> |
| <b>734.406</b>  | <b>367.706</b> | 6  | T | 11 | <b>1223.637</b> | 612.322        |
| <b>863.448</b>  | <b>432.228</b> | 7  | E | 10 | <b>1122.589</b> | <b>561.798</b> |
| <b>962.517</b>  | <b>481.762</b> | 8  | V | 9  | <b>993.547</b>  | <b>497.277</b> |
| <b>1061.585</b> | <b>531.296</b> | 9  | V | 8  | <b>894.478</b>  | <b>447.743</b> |
| <b>1118.607</b> | <b>559.807</b> | 10 | G | 7  | <b>795.410</b>  | 398.208        |
| <b>1285.639</b> | <b>643.323</b> | 11 | S | 6  | <b>738.388</b>  | <b>369.698</b> |
| 1382.691        | 691.849        | 12 | P | 5  | <b>571.356</b>  | <b>286.182</b> |
| 1483.739        | 742.373        | 13 | T | 4  | <b>474.303</b>  | <b>237.655</b> |
| 1582.807        | <b>791.907</b> | 14 | V | 3  | <b>373.256</b>  | 187.132        |
| 1681.876        | <b>841.442</b> | 15 | V | 2  | <b>274.187</b>  | 137.597        |
| 1837.977        | <b>919.492</b> | 16 | R | 1  | <b>175.119</b>  | 88.063         |

controllerType=0 controllerNumber=1 scan=5875

Intensity (10<sup>3</sup>)

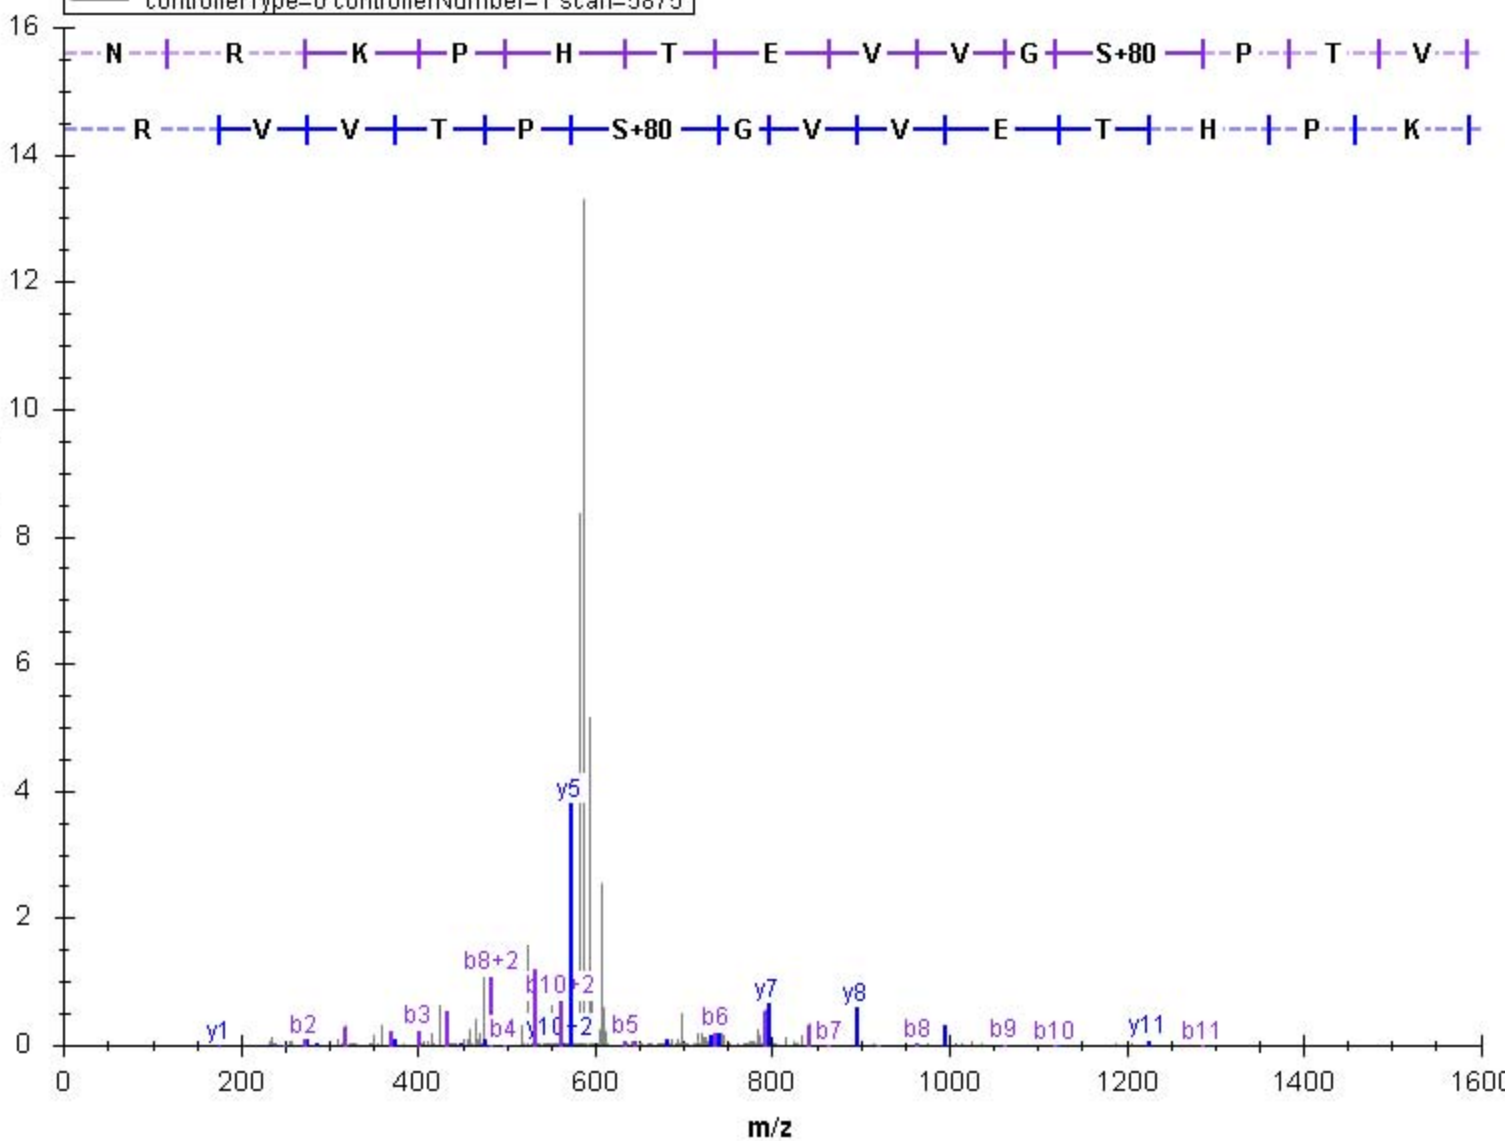

| b               | b(+2)          |    |   | y  | y(+2)           |                |
|-----------------|----------------|----|---|----|-----------------|----------------|
| 129.102         | 65.055         | 1  | K | 14 | 1585.843        | 793.425        |
| <b>226.155</b>  | 113.581        | 2  | P | 13 | <b>1457.748</b> | <b>729.378</b> |
| <b>363.214</b>  | 182.111        | 3  | H | 12 | <b>1360.696</b> | <b>680.852</b> |
| <b>464.262</b>  | 232.634        | 4  | T | 11 | <b>1223.637</b> | <b>612.322</b> |
| <b>593.304</b>  | 297.156        | 5  | E | 10 | <b>1122.589</b> | 561.798        |
| <b>692.373</b>  | <b>346.690</b> | 6  | V | 9  | <b>993.547</b>  | 497.277        |
| 791.441         | 396.224        | 7  | V | 8  | <b>894.478</b>  | <b>447.743</b> |
| <b>848.462</b>  | 424.735        | 8  | G | 7  | 795.410         | 398.208        |
| <b>1015.495</b> | 508.251        | 9  | S | 6  | <b>738.388</b>  | 369.698        |
| <b>1112.547</b> | 556.777        | 10 | P | 5  | <b>571.356</b>  | 286.182        |
| <b>1213.595</b> | <b>607.301</b> | 11 | T | 4  | <b>474.303</b>  | <b>237.655</b> |
| <b>1312.663</b> | <b>656.835</b> | 12 | V | 3  | <b>373.256</b>  | 187.132        |
| <b>1411.732</b> | 706.370        | 13 | V | 2  | <b>274.187</b>  | 137.597        |
| 1567.833        | <b>784.420</b> | 14 | R | 1  | 175.119         | 88.063         |

controllerType=0 controllerNumber=1 scan=5792

Intensity (10<sup>3</sup>)

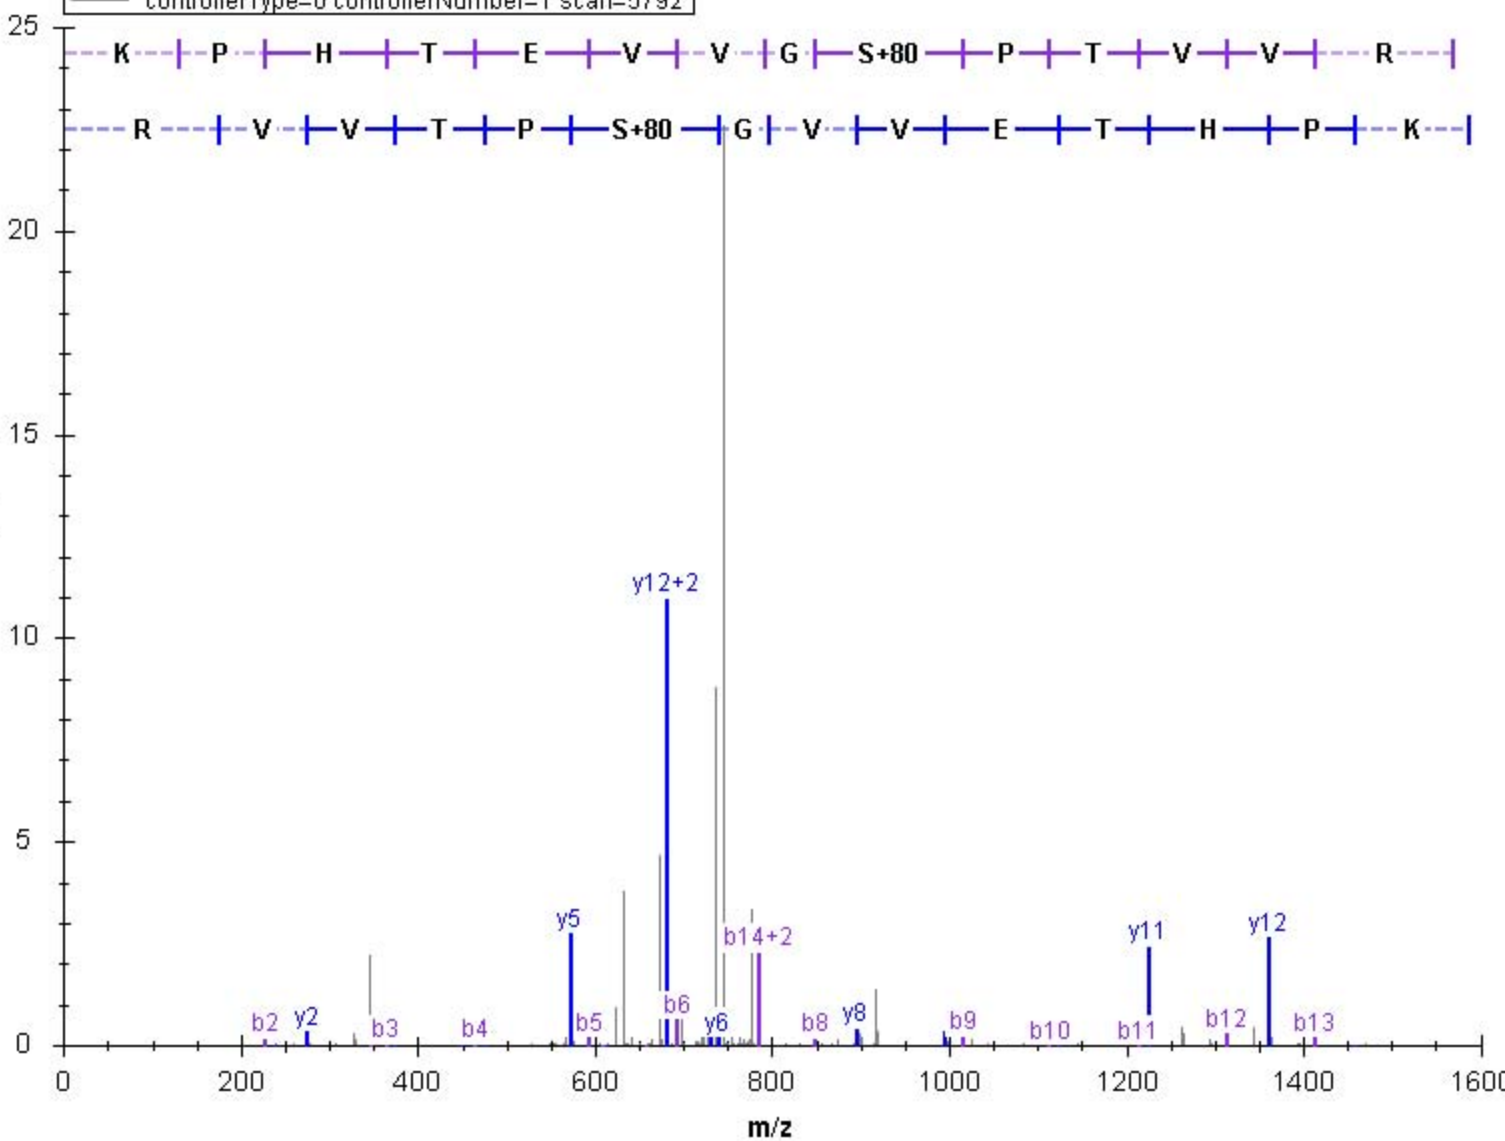



| b               | b(+2)          |    |   |    | y               | y(+2)          |
|-----------------|----------------|----|---|----|-----------------|----------------|
| 100.076         | 50.541         | 1  | V | 16 | 1689.843        | 845.425        |
| <b>247.144</b>  | 124.076        | 2  | F | 15 | 1590.775        | <b>795.891</b> |
| <b>414.176</b>  | 207.592        | 3  | S | 14 | <b>1443.706</b> | <b>722.357</b> |
| <b>515.224</b>  | 258.116        | 4  | T | 13 | <b>1276.674</b> | 638.841        |
| 572.245         | <b>286.626</b> | 5  | G | 12 | <b>1175.627</b> | 588.317        |
| <b>673.293</b>  | 337.150        | 6  | T | 11 | <b>1118.605</b> | <b>559.806</b> |
| 760.325         | 380.666        | 7  | S | 10 | <b>1017.558</b> | 509.282        |
| <b>859.393</b>  | 430.200        | 8  | V | 9  | <b>930.525</b>  | 465.766        |
| <b>960.441</b>  | <b>480.724</b> | 9  | T | 8  | <b>831.457</b>  | 416.232        |
| <b>1047.473</b> | 524.240        | 10 | S | 7  | <b>730.409</b>  | <b>365.708</b> |
| <b>1144.526</b> | 572.767        | 11 | P | 6  | <b>643.377</b>  | 322.192        |
| <b>1272.584</b> | 636.796        | 12 | Q | 5  | <b>546.325</b>  | 273.666        |
| <b>1343.622</b> | 672.314        | 13 | A | 4  | <b>418.266</b>  | 209.637        |
| <b>1456.706</b> | 728.856        | 14 | L | 3  | <b>347.229</b>  | 174.118        |
| 1543.738        | 772.372        | 15 | S | 2  | 234.145         | 117.576        |
| 1671.833        | <b>836.420</b> | 16 | K | 1  | 147.113         | 74.060         |

controllerType=0 controllerNumber=1 scan=8955

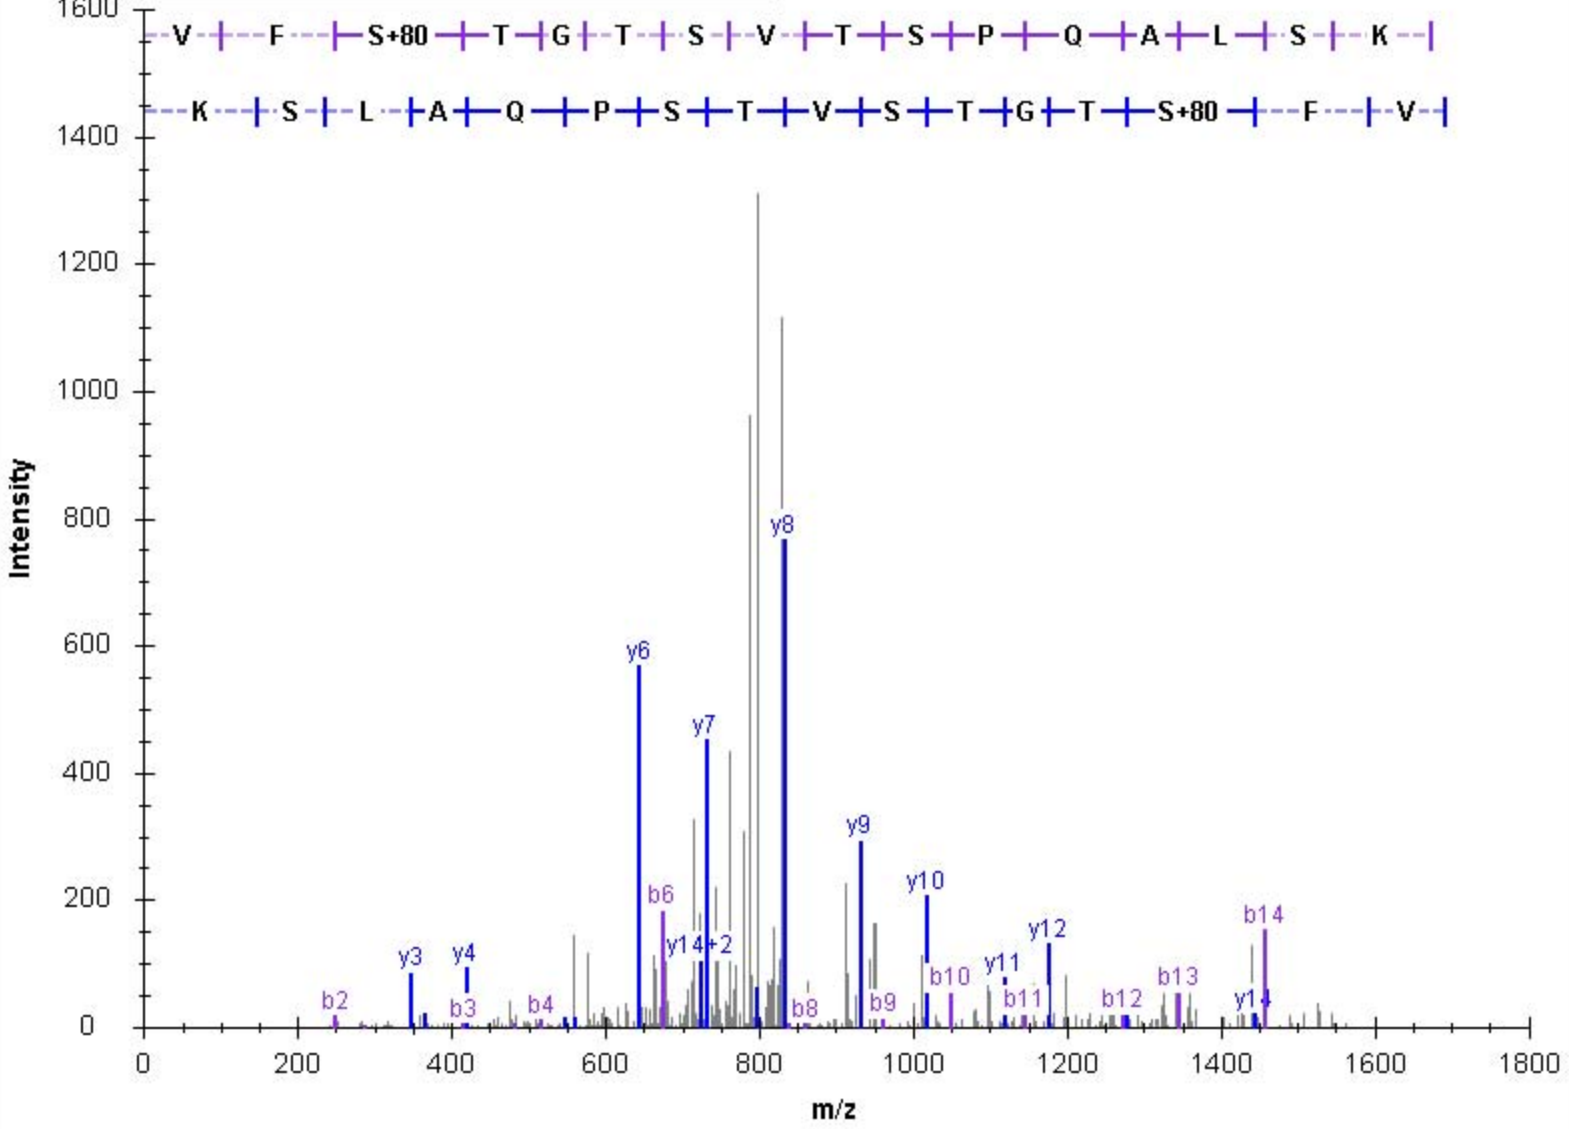

| b               | b(+2)          |    |   |    | y               | y(+2)          |
|-----------------|----------------|----|---|----|-----------------|----------------|
| <b>100.076</b>  | 50.541         | 1  | V | 16 | 1689.843        | <b>845.425</b> |
| <b>247.144</b>  | 124.076        | 2  | F | 15 | 1590.775        | <b>795.891</b> |
| 334.176         | 167.592        | 3  | S | 14 | <b>1443.706</b> | <b>722.357</b> |
| 435.224         | 218.116        | 4  | T | 13 | <b>1356.674</b> | <b>678.841</b> |
| 492.245         | 246.626        | 5  | G | 12 | 1255.627        | 628.317        |
| <b>593.293</b>  | 297.150        | 6  | T | 11 | <b>1198.605</b> | <b>599.806</b> |
| <b>680.325</b>  | 340.666        | 7  | S | 10 | <b>1097.558</b> | <b>549.282</b> |
| <b>779.393</b>  | <b>390.200</b> | 8  | V | 9  | <b>1010.525</b> | 505.766        |
| <b>880.441</b>  | <b>440.724</b> | 9  | T | 8  | <b>911.457</b>  | <b>456.232</b> |
| <b>1047.473</b> | 524.240        | 10 | S | 7  | <b>810.409</b>  | 405.708        |
| 1144.526        | 572.767        | 11 | P | 6  | <b>643.377</b>  | 322.192        |
| <b>1272.584</b> | 636.796        | 12 | Q | 5  | <b>546.325</b>  | 273.666        |
| <b>1343.622</b> | <b>672.314</b> | 13 | A | 4  | <b>418.266</b>  | 209.637        |
| <b>1456.706</b> | 728.856        | 14 | L | 3  | <b>347.229</b>  | 174.118        |
| <b>1543.738</b> | <b>772.372</b> | 15 | S | 2  | 234.145         | 117.576        |
| 1671.833        | <b>836.420</b> | 16 | K | 1  | 147.113         | 74.060         |

controllerType=0 controllerNumber=1 scan=7794

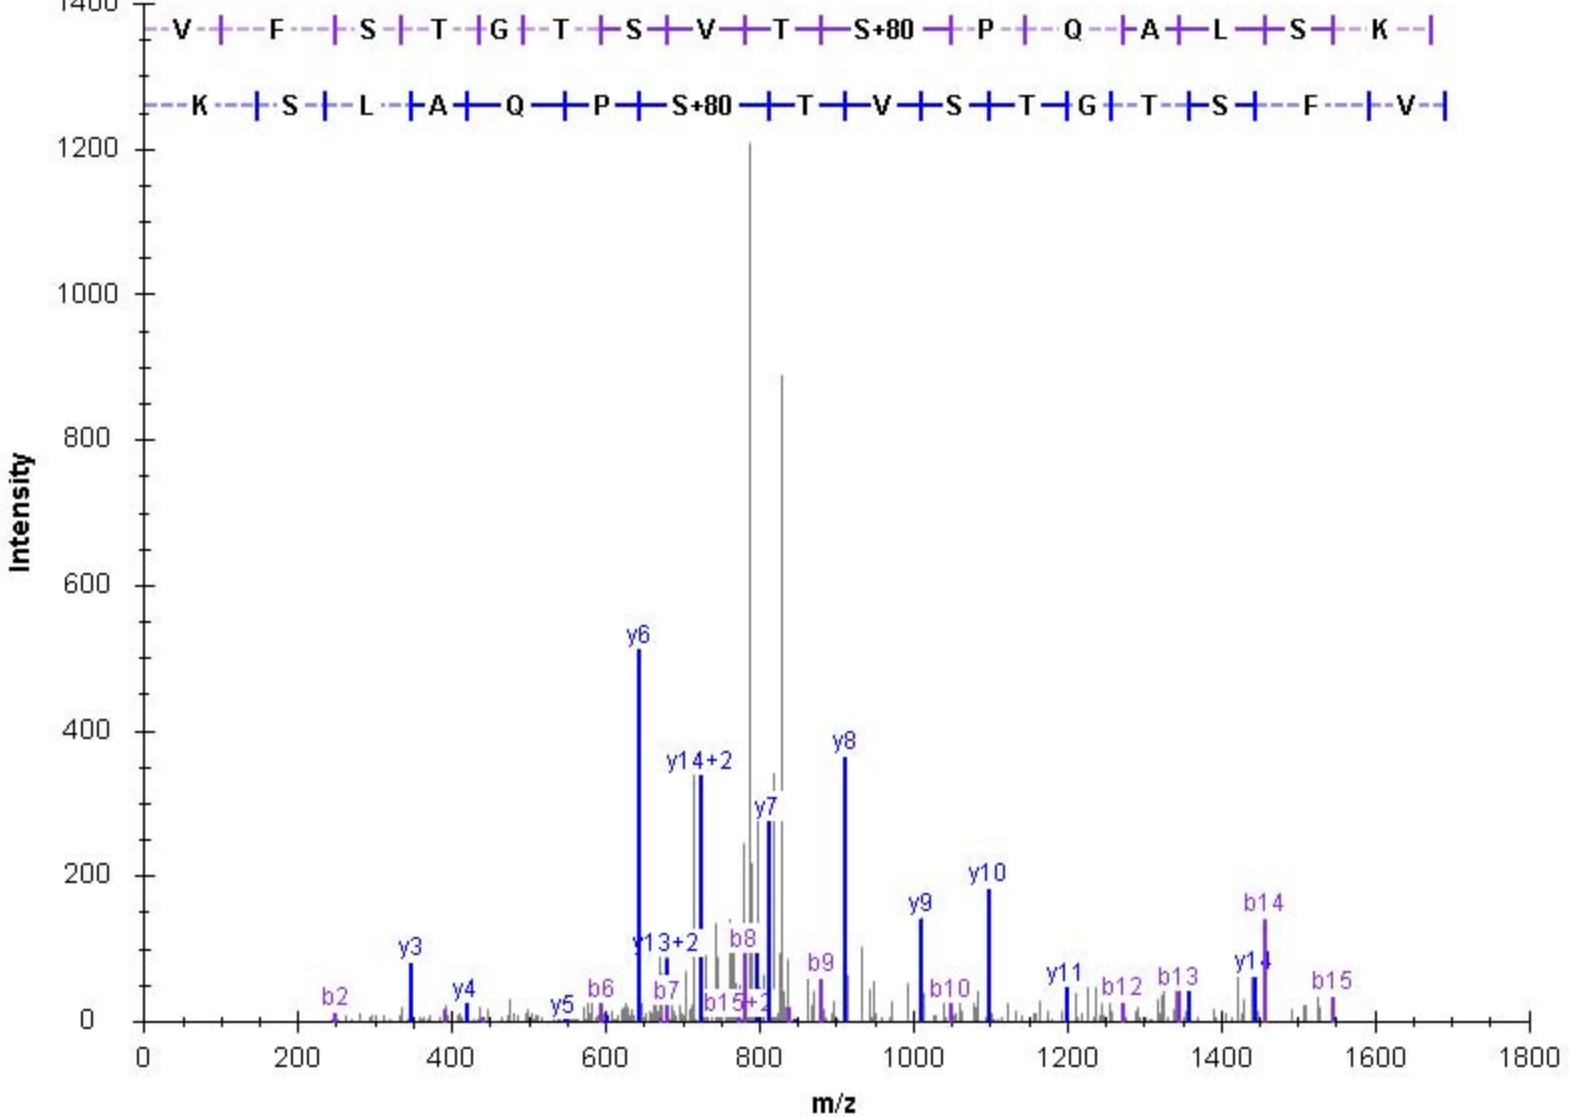

| b               | b(+2)          |    |   |    | y               | y(+2)          |
|-----------------|----------------|----|---|----|-----------------|----------------|
| 88.039          | 44.523         | 1  | S | 13 | 1646.757        | 823.882        |
| 216.134         | 108.571        | 2  | K | 12 | 1559.725        | <b>780.366</b> |
| <b>383.166</b>  | 192.087        | 3  | S | 11 | <b>1431.630</b> | <b>716.319</b> |
| <b>470.198</b>  | 235.603        | 4  | S | 10 | <b>1264.598</b> | <b>632.803</b> |
| <b>598.293</b>  | 299.650        | 5  | K | 9  | <b>1177.566</b> | 589.287        |
| <b>765.325</b>  | <b>383.166</b> | 6  | S | 8  | <b>1049.471</b> | <b>525.239</b> |
| <b>878.409</b>  | 439.708        | 7  | L | 7  | <b>882.439</b>  | <b>441.723</b> |
| <b>1006.468</b> | <b>503.738</b> | 8  | Q | 6  | <b>769.355</b>  | 385.181        |
| <b>1107.516</b> | 554.261        | 9  | T | 5  | <b>641.296</b>  | 321.152        |
| <b>1222.543</b> | <b>611.775</b> | 10 | D | 4  | <b>540.249</b>  | 270.628        |
| <b>1369.611</b> | <b>685.309</b> | 11 | F | 3  | <b>425.222</b>  | 213.114        |
| <b>1500.651</b> | <b>750.829</b> | 12 | M | 2  | <b>278.153</b>  | 139.580        |
| 1628.746        | 814.877        | 13 | K | 1  | 147.113         | 74.060         |

controllerType=0 controllerNumber=1 scan=8179

Intensity (10<sup>3</sup>)

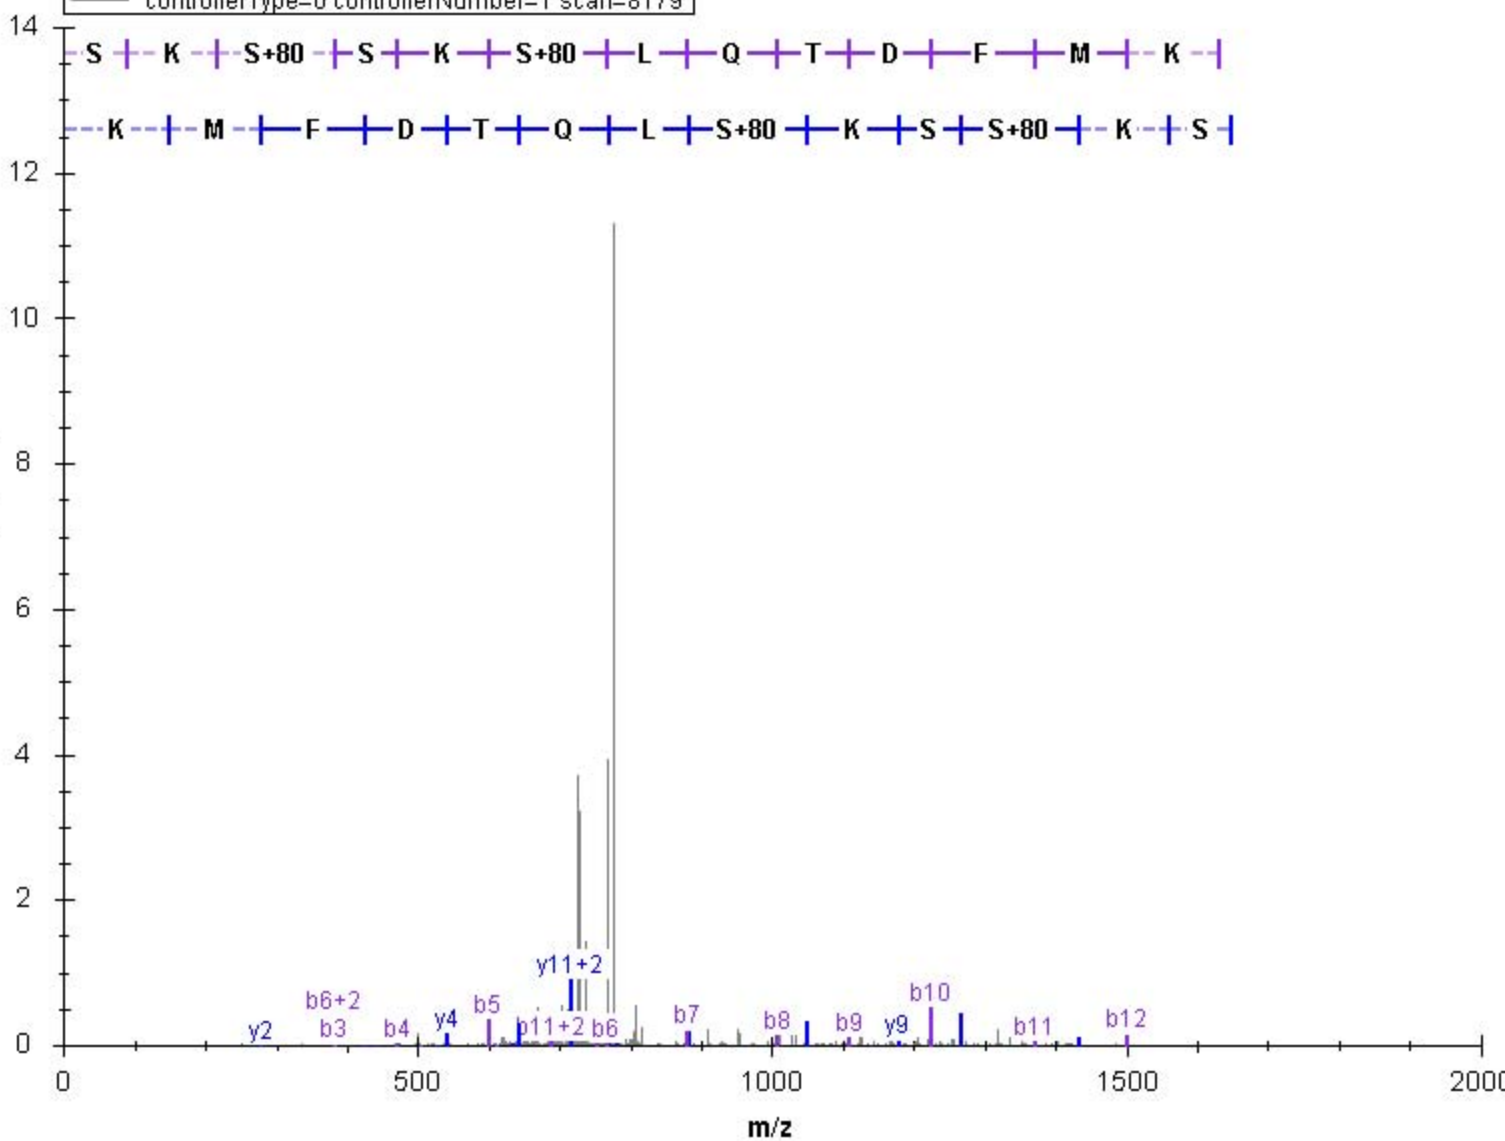

| b               | b(+2)          |    |   |    | y               | y(+2)          |
|-----------------|----------------|----|---|----|-----------------|----------------|
| <b>88.039</b>   | 44.523         | 1  | S | 11 | 1367.630        | 684.319        |
| 175.071         | 88.039         | 2  | S | 10 | 1280.598        | <b>640.803</b> |
| <b>303.166</b>  | 152.087        | 3  | K | 9  | <b>1193.566</b> | <b>597.287</b> |
| <b>470.198</b>  | <b>235.603</b> | 4  | S | 8  | <b>1065.471</b> | <b>533.239</b> |
| 583.282         | 292.145        | 5  | L | 7  | <b>898.439</b>  | <b>449.723</b> |
| <b>711.341</b>  | <b>356.174</b> | 6  | Q | 6  | <b>785.355</b>  | 393.181        |
| <b>812.389</b>  | <b>406.698</b> | 7  | T | 5  | <b>657.296</b>  | 329.152        |
| <b>927.416</b>  | 464.211        | 8  | D | 4  | <b>556.249</b>  | <b>278.628</b> |
| <b>1074.484</b> | <b>537.746</b> | 9  | F | 3  | <b>441.222</b>  | <b>221.114</b> |
| <b>1221.524</b> | 611.266        | 10 | M | 2  | <b>294.153</b>  | 147.580        |
| 1349.619        | <b>675.313</b> | 11 | K | 1  | 147.113         | 74.060         |

controllerType=0 controllerNumber=1 scan=6707

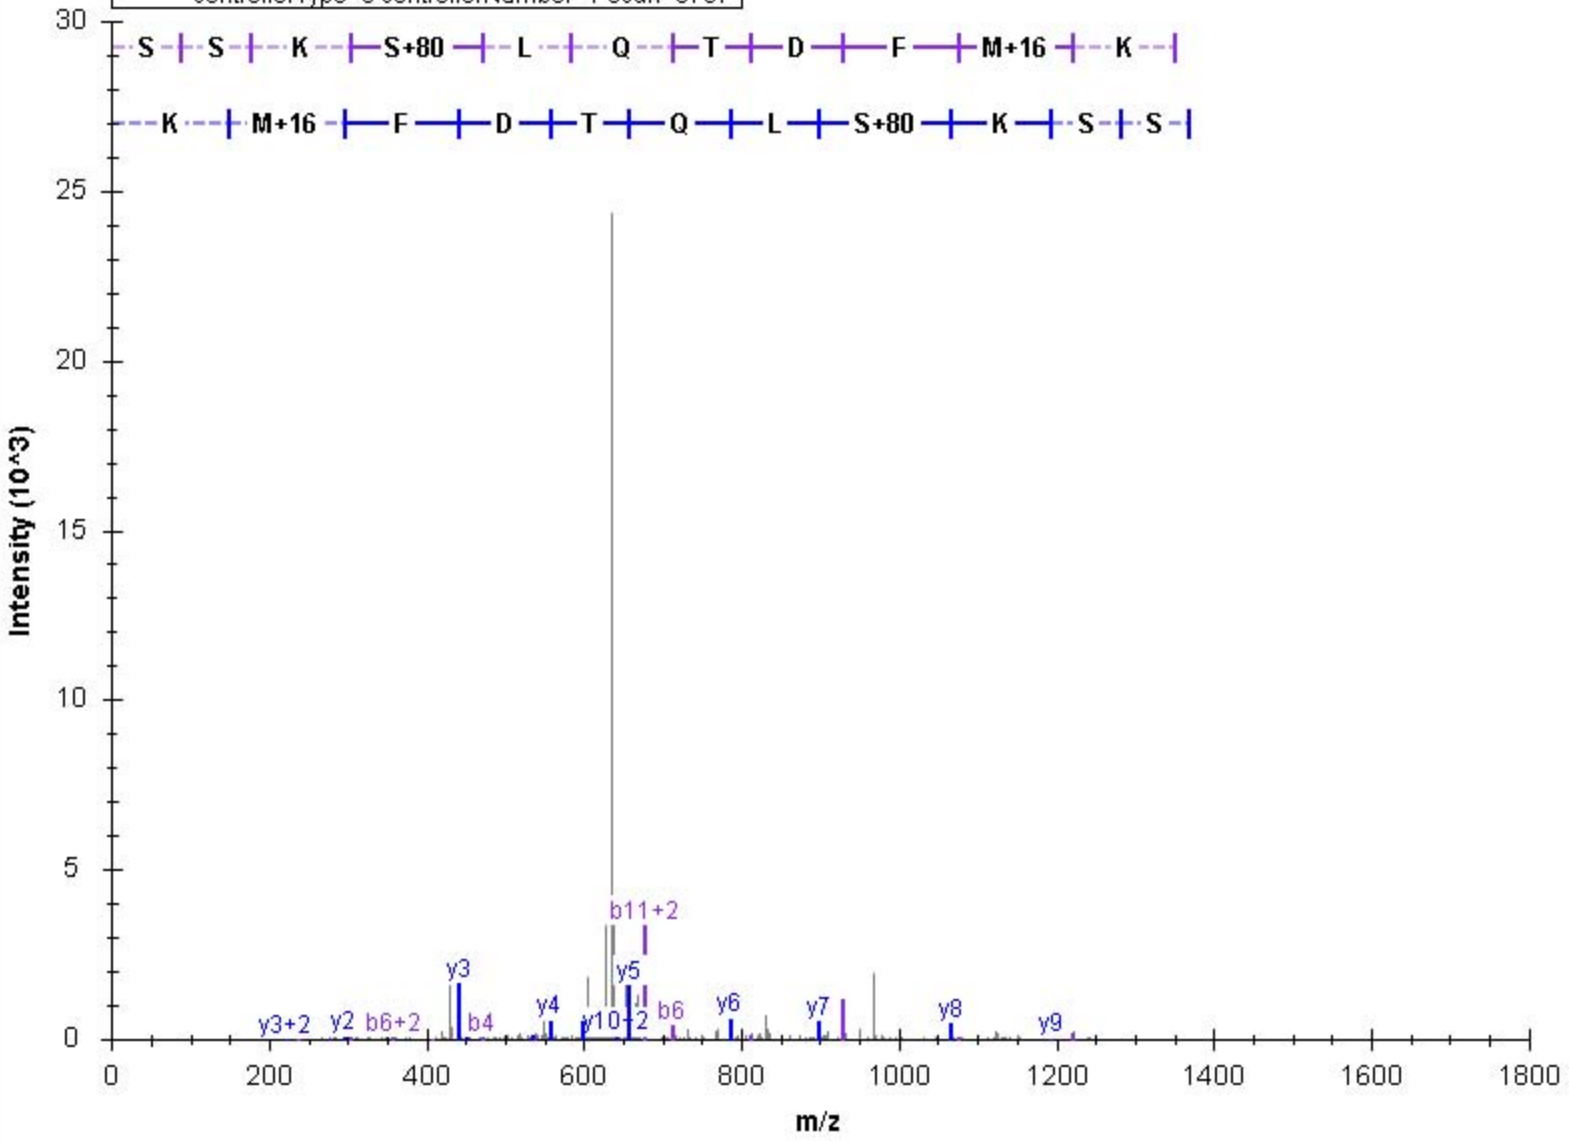



| b               | b(+2)          |    |   |    | y               | y(+2)          |
|-----------------|----------------|----|---|----|-----------------|----------------|
| 88.039          | 44.523         | 1  | S | 14 | 1612.817        | 806.912        |
| 187.108         | 94.057         | 2  | V | 13 | 1525.785        | <b>763.396</b> |
| <b>354.140</b>  | 177.574        | 3  | S | 12 | <b>1426.716</b> | 713.862        |
| <b>483.182</b>  | 242.095        | 4  | E | 11 | <b>1259.684</b> | <b>630.346</b> |
| <b>596.266</b>  | <b>298.637</b> | 5  | I | 10 | <b>1130.642</b> | 565.824        |
| <b>695.335</b>  | <b>348.171</b> | 6  | V | 9  | <b>1017.558</b> | <b>509.282</b> |
| 810.362         | <b>405.685</b> | 7  | D | 8  | <b>918.489</b>  | 459.748        |
| <b>938.457</b>  | 469.732        | 8  | K | 7  | 803.462         | 402.235        |
| <b>1039.504</b> | 520.256        | 9  | T | 6  | <b>675.367</b>  | 338.187        |
| <b>1167.563</b> | <b>584.285</b> | 10 | Q | 5  | <b>574.320</b>  | 287.663        |
| <b>1254.595</b> | <b>627.801</b> | 11 | S | 4  | <b>446.261</b>  | 223.634        |
| <b>1367.679</b> | <b>684.343</b> | 12 | L | 3  | <b>359.229</b>  | 180.118        |
| 1481.722        | <b>741.365</b> | 13 | N | 2  | <b>246.145</b>  | 123.576        |
| 1594.806        | <b>797.907</b> | 14 | I | 1  | 132.102         | 66.555         |

controllerType=0 controllerNumber=1 scan=10200

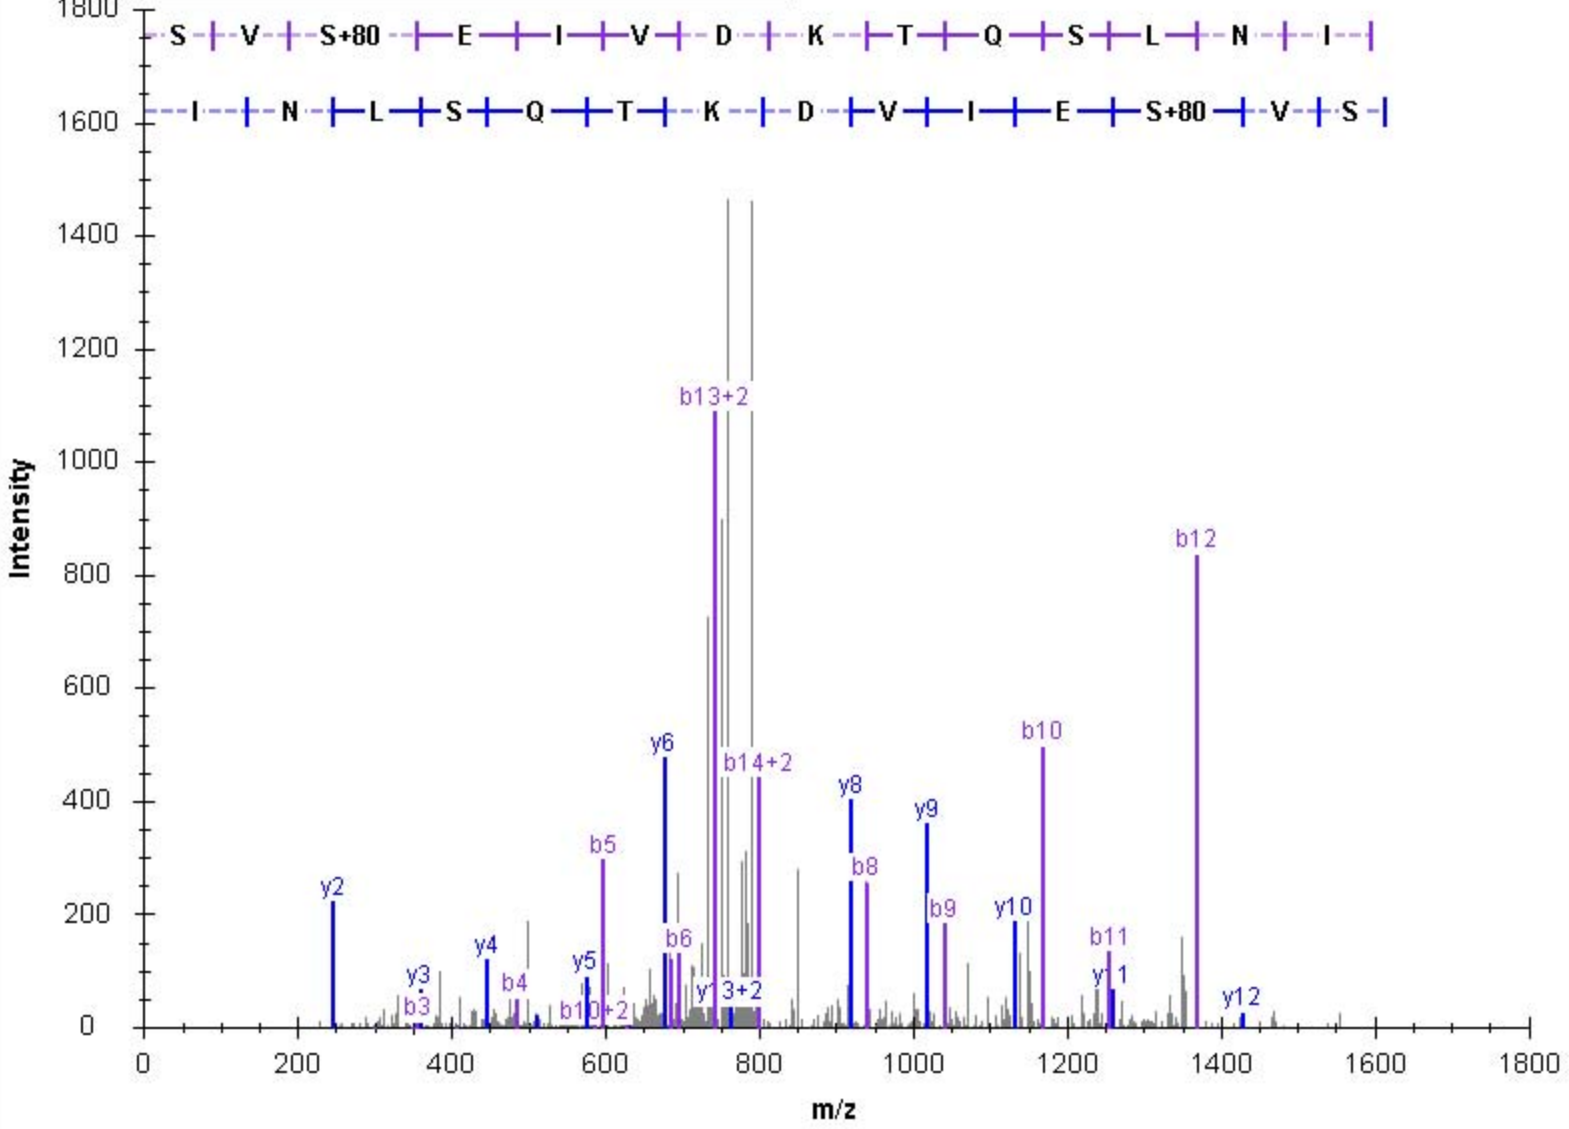

| b               | b(+2)          |    |   |    | y               | y(+2)          |
|-----------------|----------------|----|---|----|-----------------|----------------|
| <b>88.039</b>   | 44.523         | 1  | S | 14 | 1612.817        | 806.912        |
| 187.108         | 94.057         | 2  | V | 13 | 1525.785        | 763.396        |
| 274.140         | 137.574        | 3  | S | 12 | 1426.716        | <b>713.862</b> |
| <b>403.182</b>  | 202.095        | 4  | E | 11 | 1339.684        | 670.346        |
| 516.266         | 258.637        | 5  | I | 10 | <b>1210.642</b> | <b>605.824</b> |
| <b>615.335</b>  | 308.171        | 6  | V | 9  | <b>1097.558</b> | 549.282        |
| <b>730.362</b>  | 365.685        | 7  | D | 8  | <b>998.489</b>  | 499.748        |
| <b>858.457</b>  | <b>429.732</b> | 8  | K | 7  | <b>883.462</b>  | 442.235        |
| <b>959.504</b>  | 480.256        | 9  | T | 6  | <b>755.367</b>  | 378.187        |
| <b>1087.563</b> | 544.285        | 10 | Q | 5  | <b>654.320</b>  | 327.663        |
| <b>1254.595</b> | 627.801        | 11 | S | 4  | <b>526.261</b>  | 263.634        |
| <b>1367.679</b> | <b>684.343</b> | 12 | L | 3  | <b>359.229</b>  | 180.118        |
| <b>1481.722</b> | <b>741.365</b> | 13 | N | 2  | <b>246.145</b>  | 123.576        |
| 1594.806        | <b>797.907</b> | 14 | I | 1  | 132.102         | 66.555         |

controllerType=0 controllerNumber=1 scan=10317

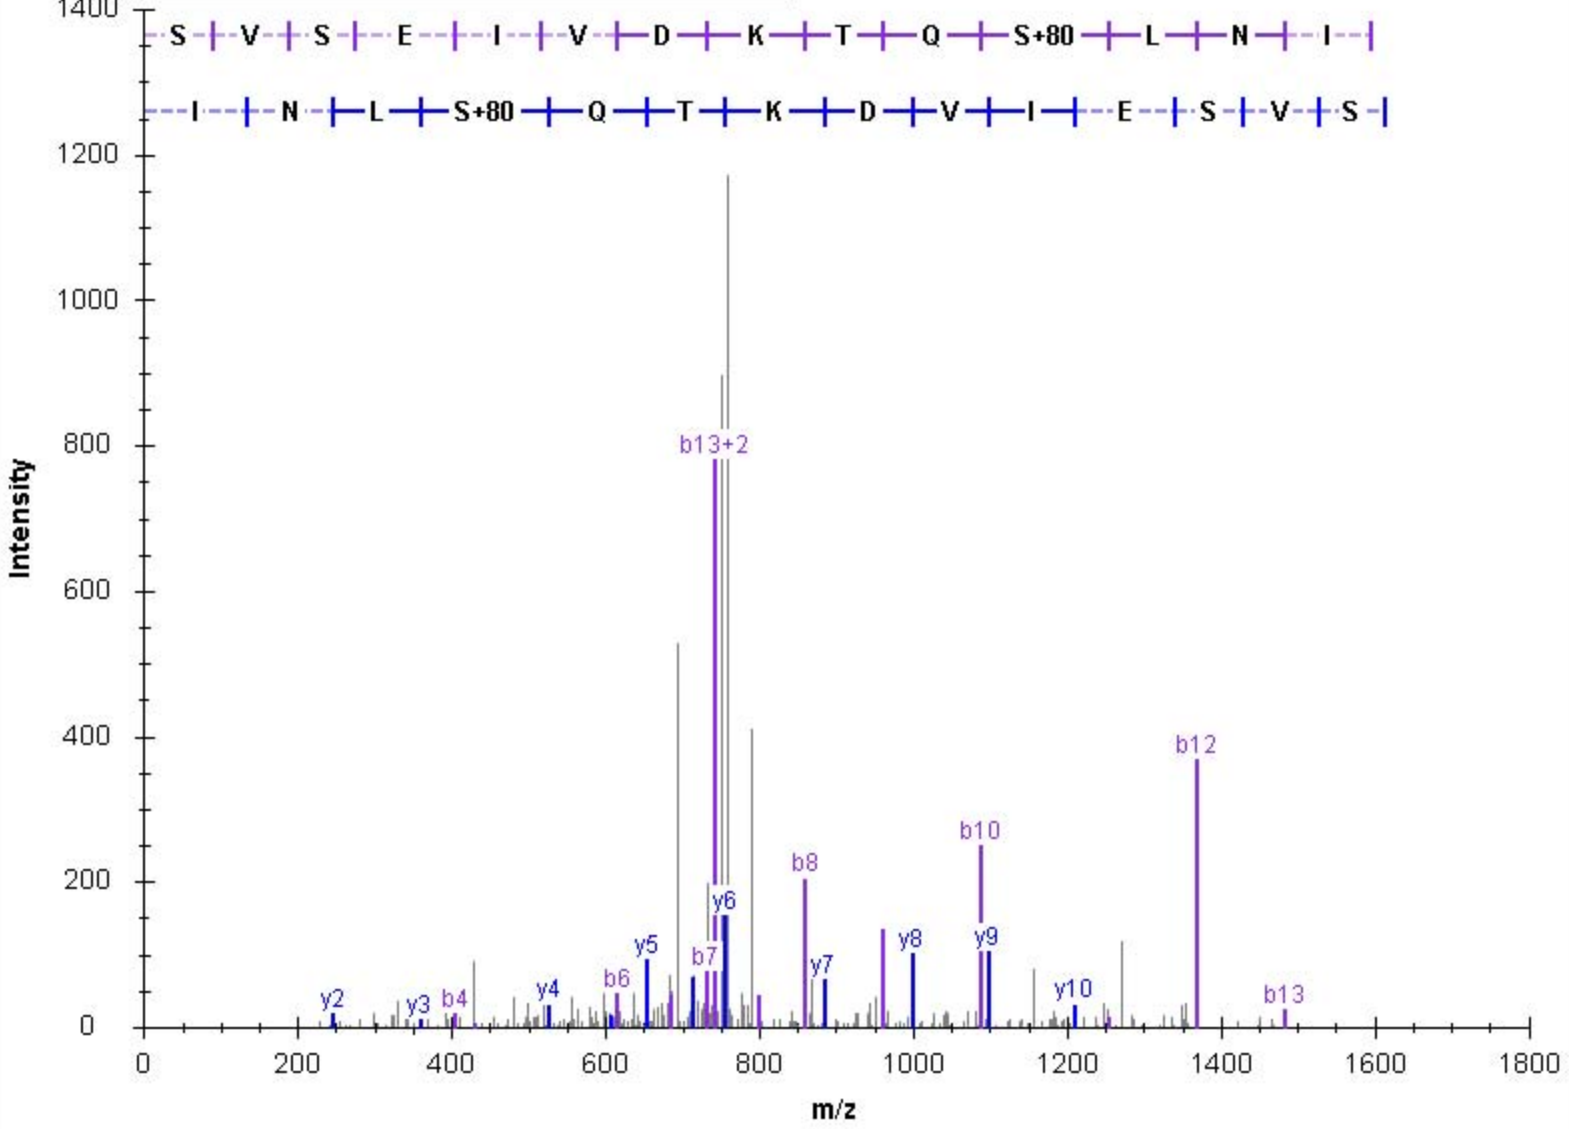

| b               | b(+2)          |    |   |    | y               | y(+2)          |
|-----------------|----------------|----|---|----|-----------------|----------------|
| 88.039          | 44.523         | 1  | S | 13 | 1561.702        | 781.355        |
| <b>225.098</b>  | 113.053        | 2  | H | 12 | 1474.670        | <b>737.839</b> |
| <b>339.141</b>  | 170.074        | 3  | N | 11 | <b>1337.611</b> | 669.309        |
| <b>486.210</b>  | 243.608        | 4  | F | 10 | <b>1223.568</b> | <b>612.288</b> |
| <b>573.242</b>  | 287.124        | 5  | S | 9  | <b>1076.500</b> | <b>538.753</b> |
| <b>660.274</b>  | 330.640        | 6  | S | 8  | <b>989.468</b>  | 495.237        |
| <b>747.306</b>  | <b>374.156</b> | 7  | S | 7  | <b>902.436</b>  | 451.721        |
| <b>861.349</b>  | 431.178        | 8  | N | 6  | <b>815.404</b>  | 408.205        |
| <b>1042.396</b> | <b>521.702</b> | 9  | T | 5  | <b>701.361</b>  | <b>351.184</b> |
| <b>1139.449</b> | 570.228        | 10 | P | 4  | <b>520.313</b>  | <b>260.660</b> |
| <b>1302.512</b> | <b>651.760</b> | 11 | Y | 3  | <b>423.260</b>  | 212.134        |
| <b>1415.596</b> | <b>708.302</b> | 12 | L | 2  | <b>260.197</b>  | 130.602        |
| 1543.691        | <b>772.349</b> | 13 | K | 1  | 147.113         | 74.060         |

controllerType=0 controllerNumber=1 scan=7201

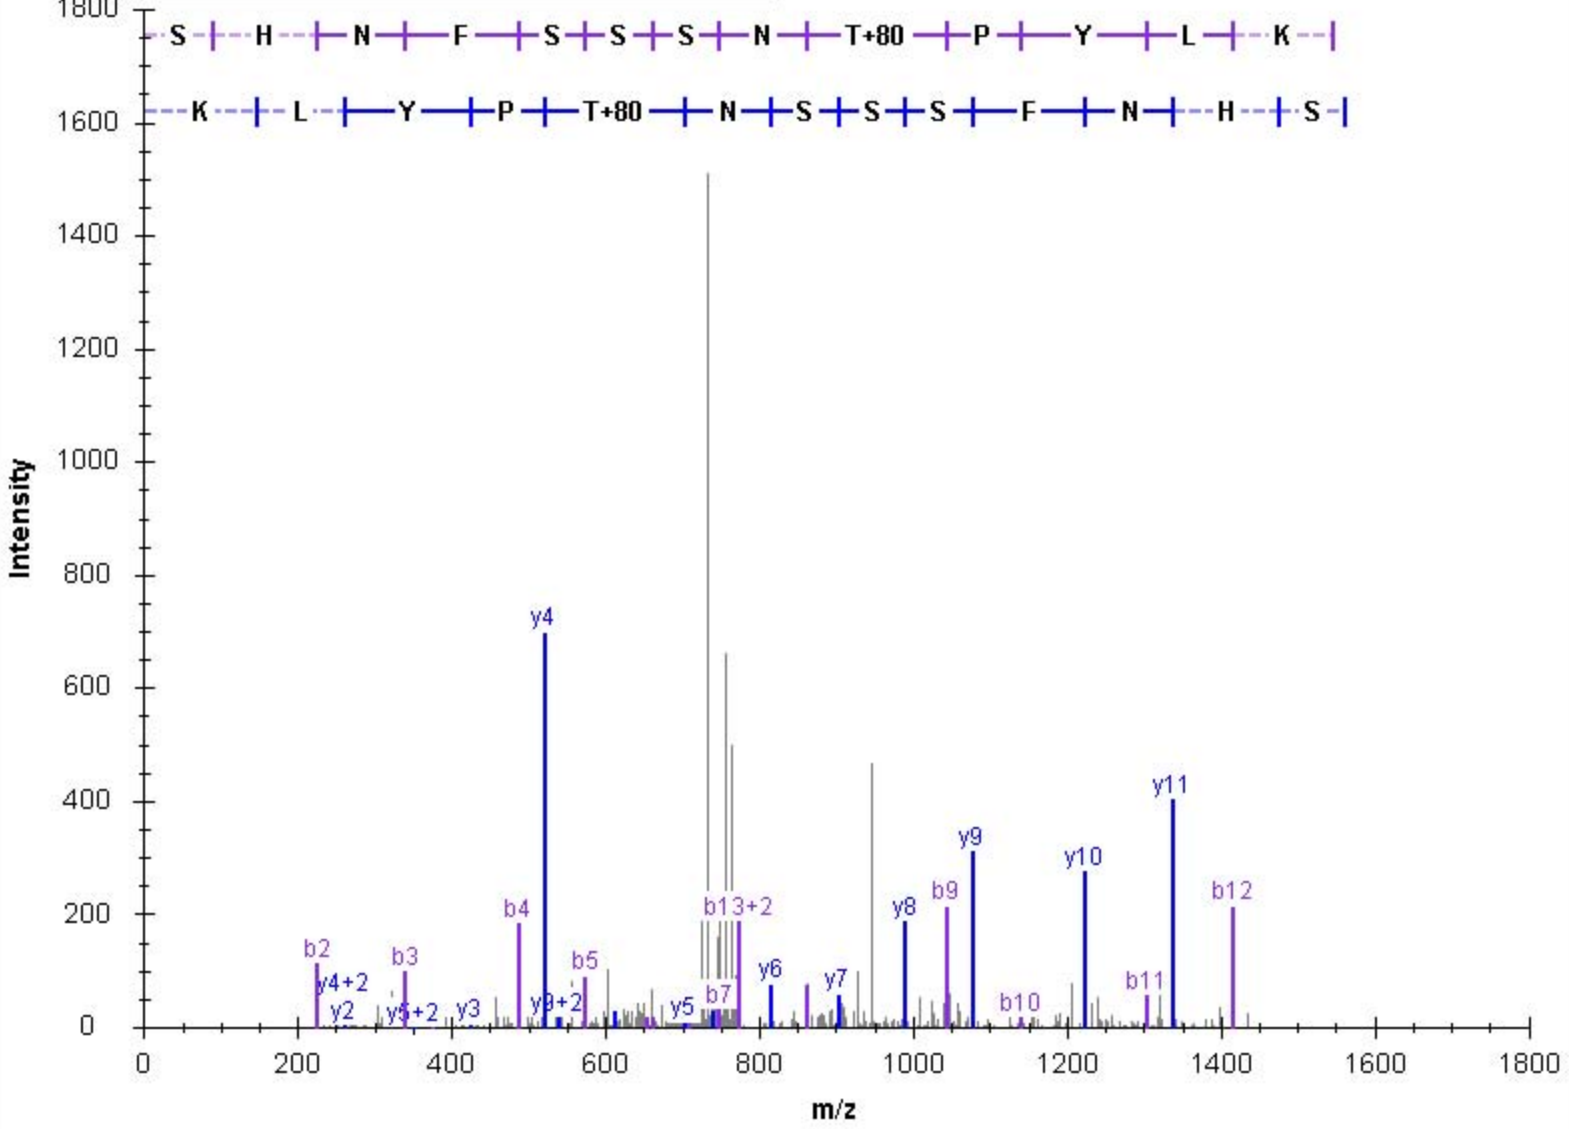

| b               | b(+2)          |    |   |    | y               | y(+2)          |
|-----------------|----------------|----|---|----|-----------------|----------------|
| 88.039          | 44.523         | 1  | S | 17 | 1831.917        | 916.462        |
| 269.087         | 135.047        | 2  | T | 16 | 1744.885        | <b>872.946</b> |
| 366.140         | 183.574        | 3  | P | 15 | <b>1563.838</b> | <b>782.422</b> |
| <b>494.198</b>  | 247.603        | 4  | Q | 14 | 1466.785        | <b>733.896</b> |
| <b>607.282</b>  | 304.145        | 5  | I | 13 | <b>1338.726</b> | 669.867        |
| <b>708.330</b>  | 354.669        | 6  | T | 12 | <b>1225.642</b> | 613.325        |
| <b>765.352</b>  | 383.179        | 7  | G | 11 | <b>1124.595</b> | <b>562.801</b> |
| <b>852.384</b>  | 426.695        | 8  | S | 10 | <b>1067.573</b> | 534.290        |
| 949.436         | 475.222        | 9  | P | 9  | <b>980.541</b>  | <b>490.774</b> |
| <b>1062.520</b> | 531.764        | 10 | L | 8  | <b>883.488</b>  | 442.248        |
| <b>1177.547</b> | 589.277        | 11 | D | 7  | <b>770.404</b>  | 385.706        |
| 1274.600        | <b>637.804</b> | 12 | P | 6  | <b>655.377</b>  | 328.192        |
| <b>1388.643</b> | 694.825        | 13 | N | 5  | 558.325         | 279.666        |
| 1489.691        | 745.349        | 14 | T | 4  | <b>444.282</b>  | 222.644        |
| 1586.743        | 793.875        | 15 | P | 3  | <b>343.234</b>  | 172.121        |
| <b>1685.812</b> | <b>843.410</b> | 16 | V | 2  | 246.181         | 123.594        |
| 1813.907        | <b>907.457</b> | 17 | K | 1  | 147.113         | 74.060         |

controllerType=0 controllerNumber=1 scan=8756

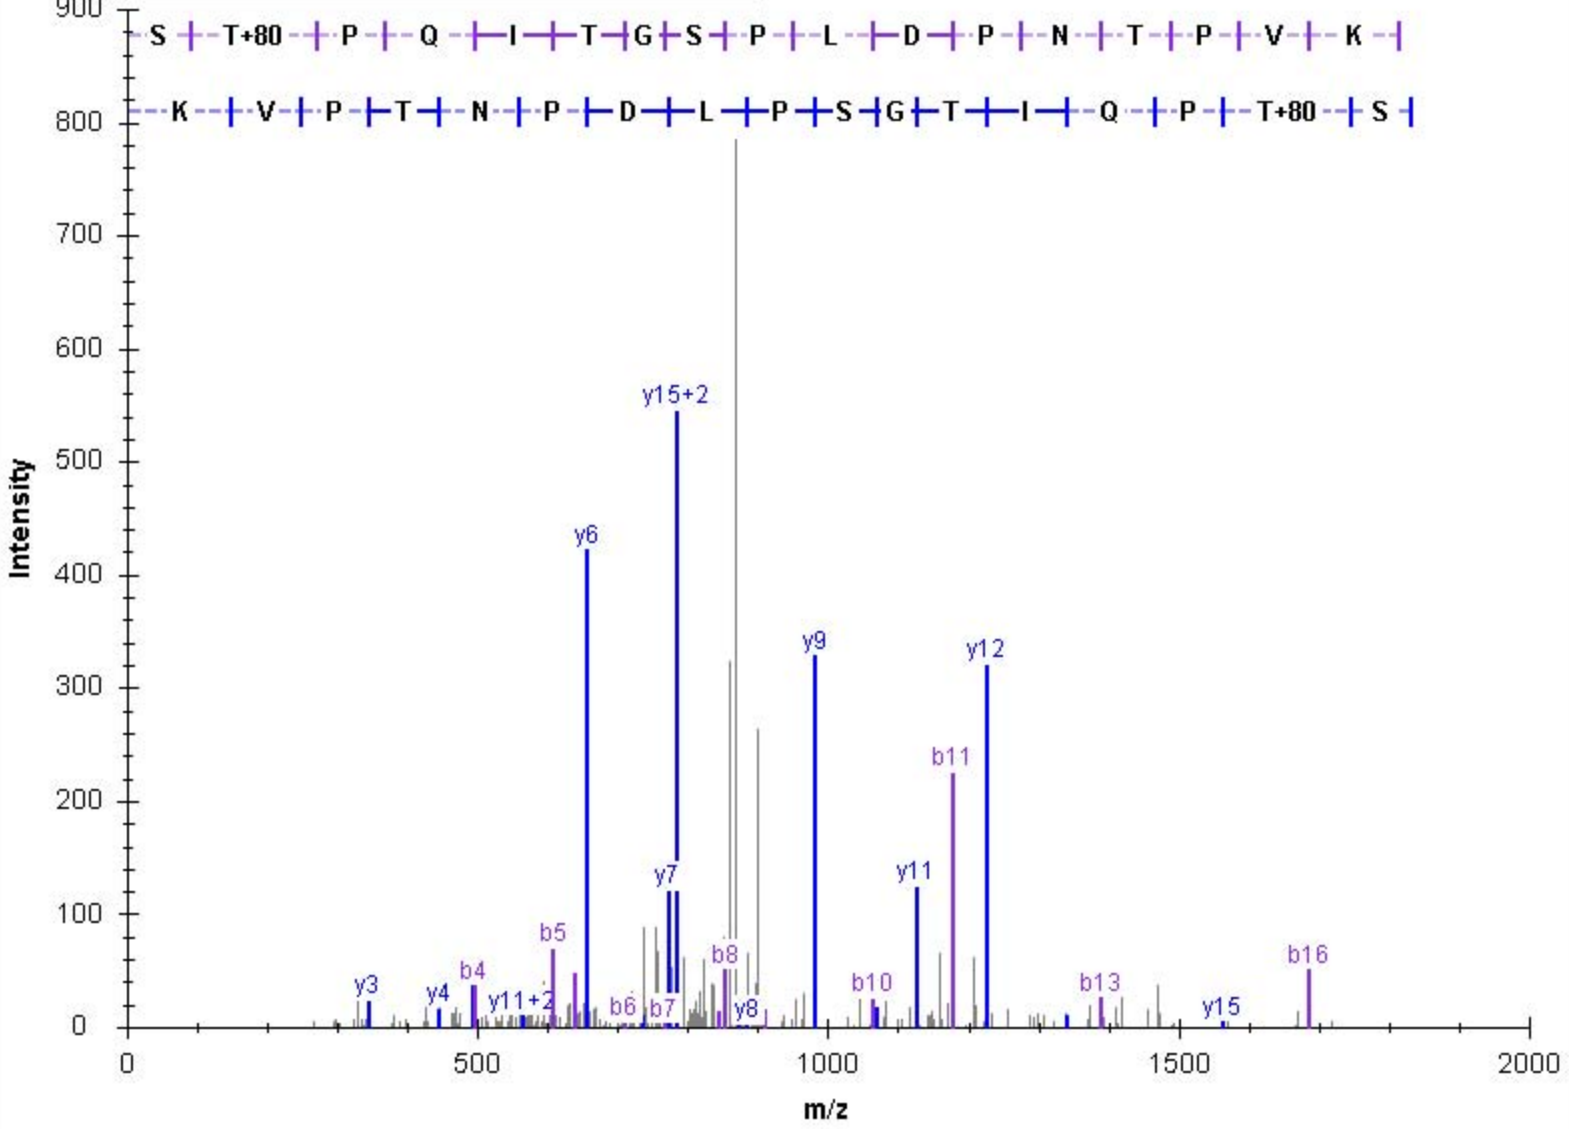



| b               | b(+2)          |    |   |    | y               | y(+2)          |
|-----------------|----------------|----|---|----|-----------------|----------------|
| 88.039          | 44.523         | 1  | S | 17 | 1831.917        | 916.462        |
| 189.087         | 95.047         | 2  | T | 16 | 1744.885        | <b>872.946</b> |
| 286.140         | 143.574        | 3  | P | 15 | 1643.838        | <b>822.422</b> |
| <b>414.198</b>  | 207.603        | 4  | Q | 14 | 1546.785        | <b>773.896</b> |
| <b>527.282</b>  | 264.145        | 5  | I | 13 | <b>1418.726</b> | 709.867        |
| <b>628.330</b>  | <b>314.669</b> | 6  | T | 12 | <b>1305.642</b> | 653.325        |
| <b>685.352</b>  | <b>343.179</b> | 7  | G | 11 | <b>1204.595</b> | <b>602.801</b> |
| 852.384         | <b>426.695</b> | 8  | S | 10 | <b>1147.573</b> | <b>574.290</b> |
| 949.436         | 475.222        | 9  | P | 9  | <b>980.541</b>  | 490.774        |
| <b>1062.520</b> | 531.764        | 10 | L | 8  | 883.488         | 442.248        |
| <b>1177.547</b> | 589.277        | 11 | D | 7  | <b>770.404</b>  | <b>385.706</b> |
| 1274.600        | <b>637.804</b> | 12 | P | 6  | <b>655.377</b>  | 328.192        |
| <b>1388.643</b> | 694.825        | 13 | N | 5  | 558.325         | <b>279.666</b> |
| <b>1489.691</b> | 745.349        | 14 | T | 4  | <b>444.282</b>  | 222.644        |
| 1586.743        | 793.875        | 15 | P | 3  | <b>343.234</b>  | 172.121        |
| <b>1685.812</b> | 843.410        | 16 | V | 2  | 246.181         | 123.594        |
| 1813.907        | 907.457        | 17 | K | 1  | 147.113         | 74.060         |

controllerType=0 controllerNumber=1 scan=8479

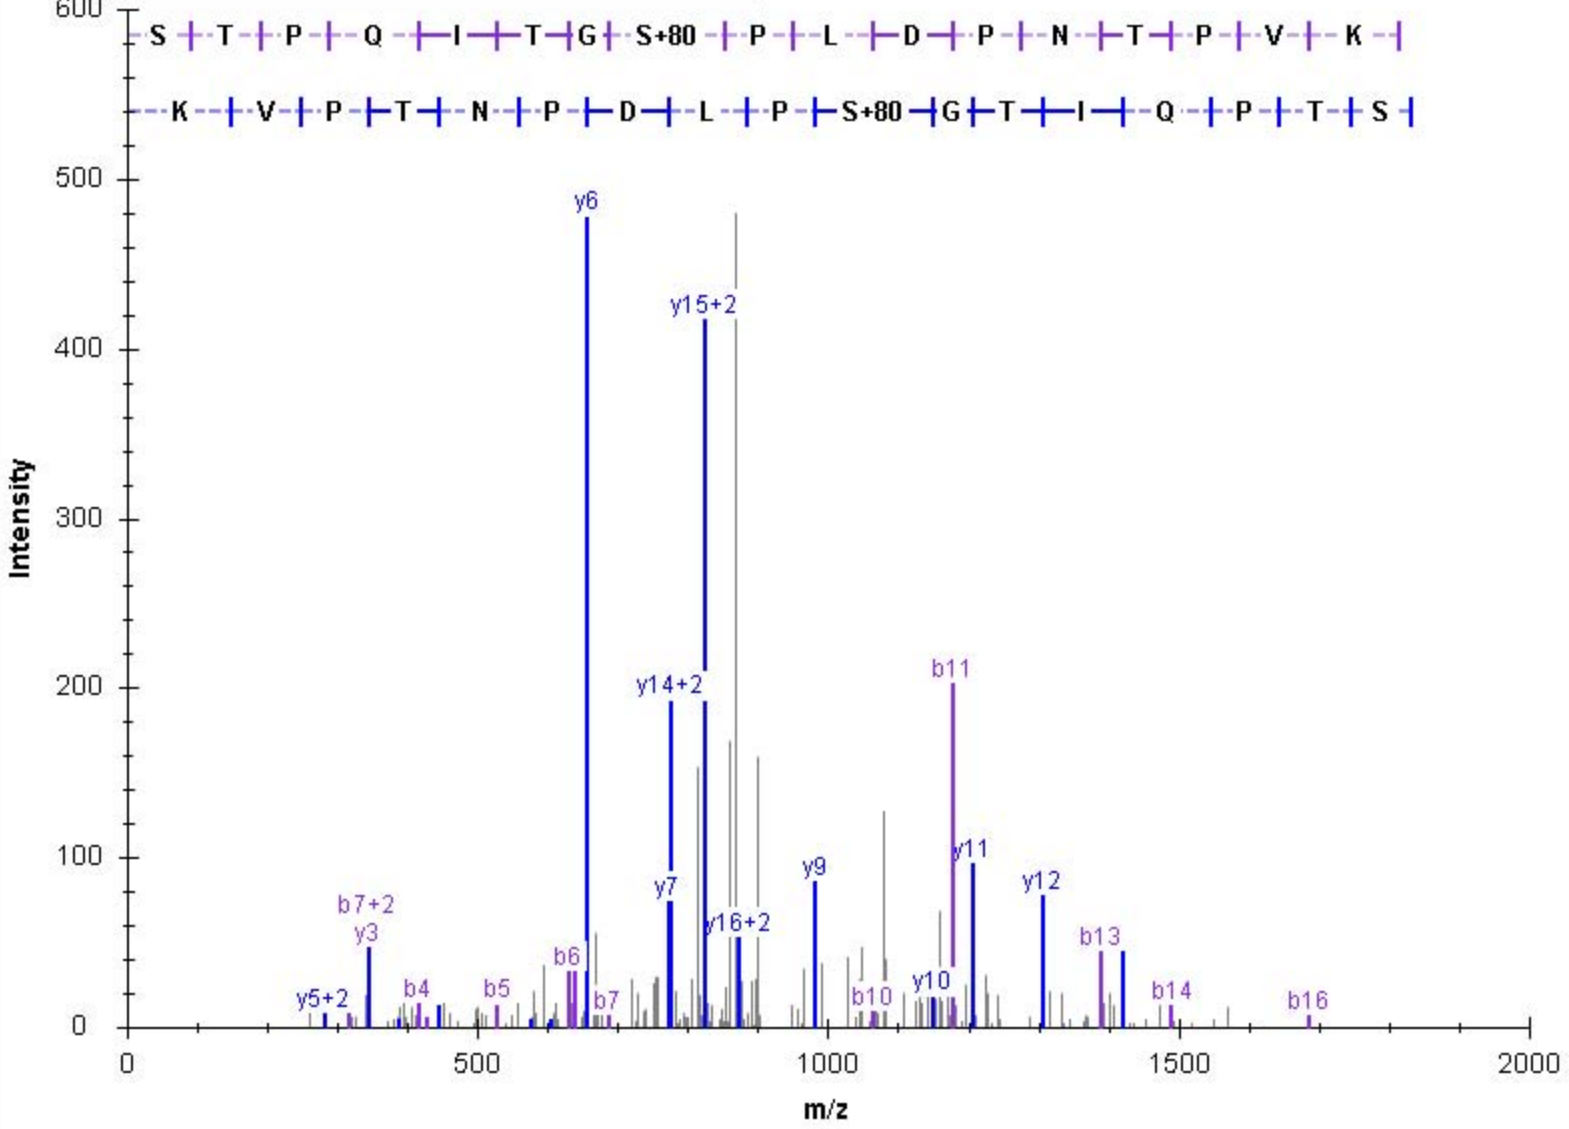

| b               | b(+2)          |    |   |    | y               | y(+2)          |
|-----------------|----------------|----|---|----|-----------------|----------------|
| <b>168.039</b>  | 84.523         | 1  | S | 18 | 2131.845        | 1066.426       |
| <b>281.123</b>  | 141.065        | 2  | L | 17 | 1964.813        | 982.910        |
| <b>368.155</b>  | 184.581        | 3  | S | 16 | 1851.729        | <b>926.368</b> |
| <b>497.198</b>  | 249.103        | 4  | E | 15 | 1764.697        | <b>882.852</b> |
| <b>626.241</b>  | <b>313.624</b> | 5  | E | 14 | 1635.654        | <b>818.331</b> |
| 713.273         | 357.140        | 6  | S | 13 | 1506.611        | <b>753.809</b> |
| <b>841.331</b>  | 421.169        | 7  | Q | 12 | 1419.579        | 710.293        |
| <b>1008.363</b> | 504.685        | 8  | S | 11 | <b>1291.521</b> | <b>646.264</b> |
| <b>1095.395</b> | 548.201        | 9  | S | 10 | <b>1124.489</b> | <b>562.748</b> |
| <b>1182.427</b> | <b>591.717</b> | 10 | S | 9  | <b>1037.457</b> | <b>519.232</b> |
| <b>1296.470</b> | <b>648.739</b> | 11 | N | 8  | <b>950.425</b>  | <b>475.716</b> |
| 1427.511        | 714.259        | 12 | M | 7  | <b>836.382</b>  | <b>418.695</b> |
| 1542.538        | <b>771.772</b> | 13 | D | 6  | <b>705.341</b>  | 353.174        |
| <b>1657.565</b> | <b>829.286</b> | 14 | D | 5  | <b>590.314</b>  | 295.661        |
| <b>1770.649</b> | <b>885.828</b> | 15 | I | 4  | <b>475.287</b>  | 238.147        |
| 1857.681        | <b>929.344</b> | 16 | S | 3  | <b>362.203</b>  | 181.605        |
| 1985.739        | <b>993.373</b> | 17 | Q | 2  | <b>275.171</b>  | 138.089        |
| 2113.834        | 1057.421       | 18 | K | 1  | 147.113         | 74.060         |

controllerType=0 controllerNumber=1 scan=7983

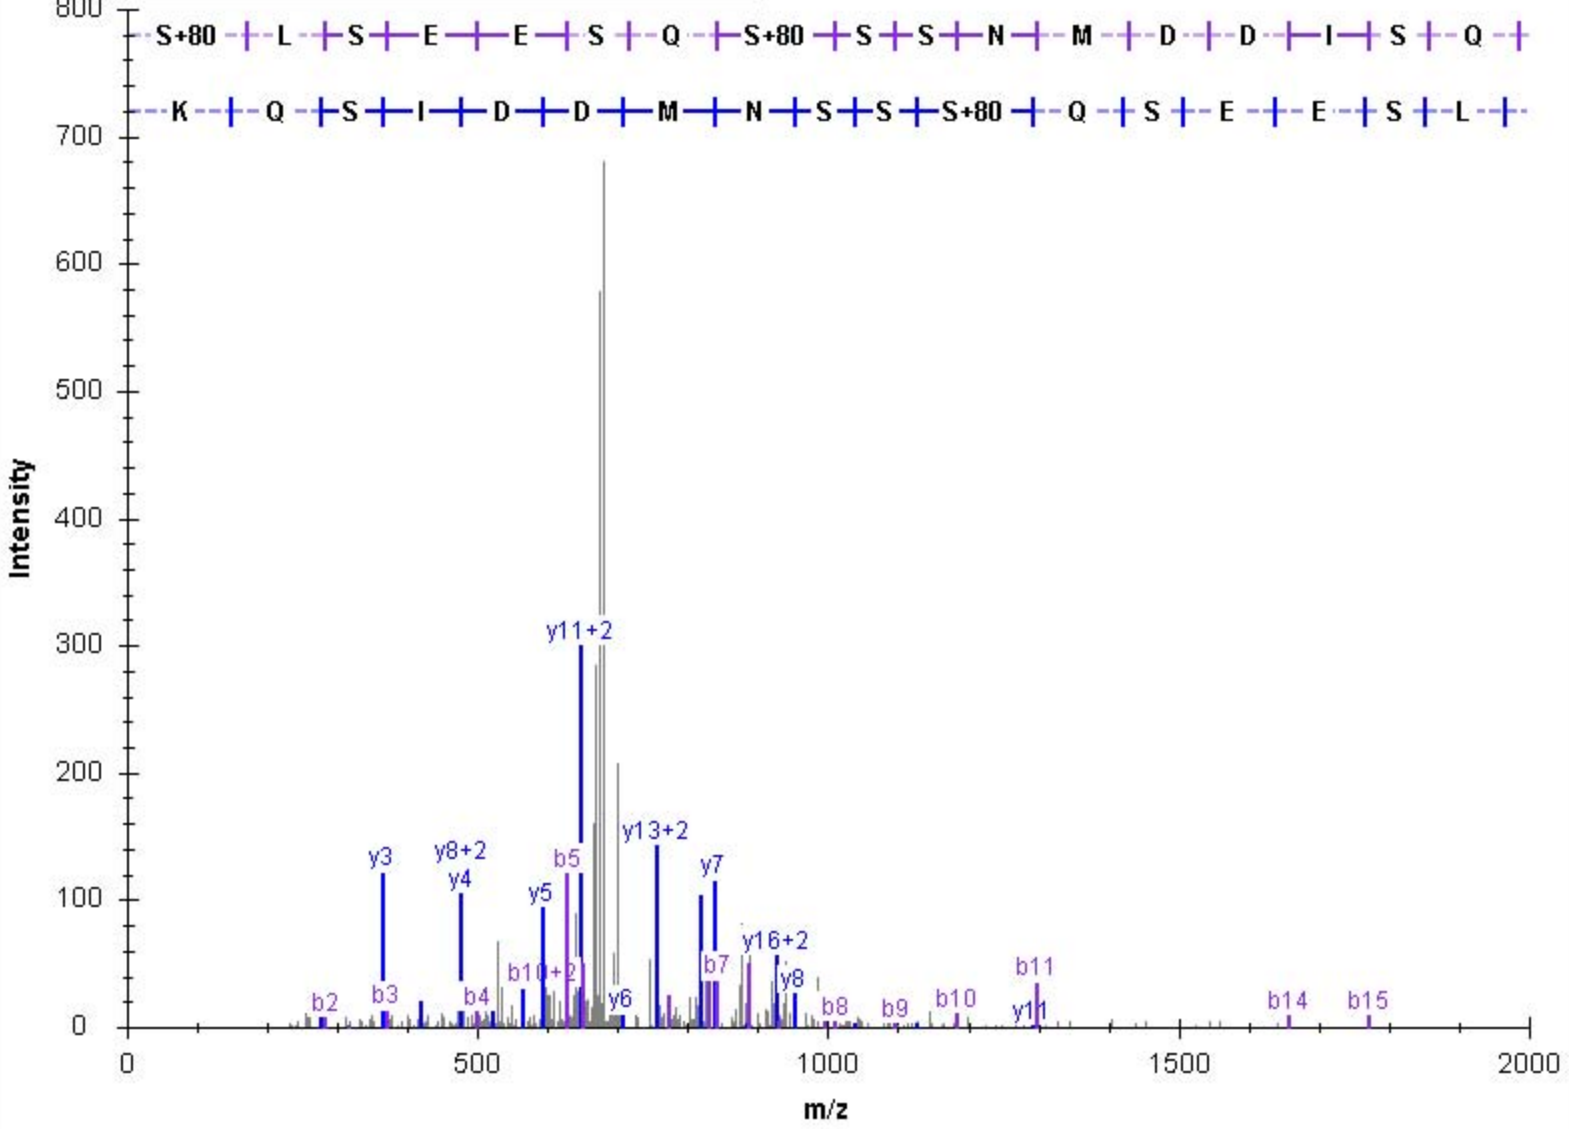

| b               | b(+2)          |    |   |    | y               | y(+2)          |
|-----------------|----------------|----|---|----|-----------------|----------------|
| <b>168.039</b>  | 84.523         | 1  | S | 18 | 2051.845        | 1026.426       |
| <b>281.123</b>  | 141.065        | 2  | L | 17 | 1884.813        | <b>942.910</b> |
| <b>368.155</b>  | 184.581        | 3  | S | 16 | 1771.729        | <b>886.368</b> |
| <b>497.198</b>  | 249.103        | 4  | E | 15 | 1684.697        | <b>842.852</b> |
| <b>626.241</b>  | 313.624        | 5  | E | 14 | 1555.654        | <b>778.331</b> |
| 713.273         | 357.140        | 6  | S | 13 | 1426.611        | <b>713.809</b> |
| <b>841.331</b>  | <b>421.169</b> | 7  | Q | 12 | 1339.579        | <b>670.293</b> |
| 928.363         | 464.685        | 8  | S | 11 | <b>1211.521</b> | <b>606.264</b> |
| <b>1015.395</b> | <b>508.201</b> | 9  | S | 10 | 1124.489        | <b>562.748</b> |
| <b>1102.427</b> | <b>551.717</b> | 10 | S | 9  | <b>1037.457</b> | <b>519.232</b> |
| <b>1216.470</b> | 608.739        | 11 | N | 8  | <b>950.425</b>  | <b>475.716</b> |
| <b>1347.511</b> | <b>674.259</b> | 12 | M | 7  | <b>836.382</b>  | <b>418.695</b> |
| 1462.538        | <b>731.772</b> | 13 | D | 6  | <b>705.341</b>  | 353.174        |
| <b>1577.565</b> | <b>789.286</b> | 14 | D | 5  | <b>590.314</b>  | 295.661        |
| 1690.649        | <b>845.828</b> | 15 | I | 4  | <b>475.287</b>  | 238.147        |
| 1777.681        | <b>889.344</b> | 16 | S | 3  | <b>362.203</b>  | 181.605        |
| 1905.739        | <b>953.373</b> | 17 | Q | 2  | <b>275.171</b>  | 138.089        |
| 2033.834        | 1017.421       | 18 | K | 1  | 147.113         | 74.060         |

controllerType=0 controllerNumber=1 scan=8058

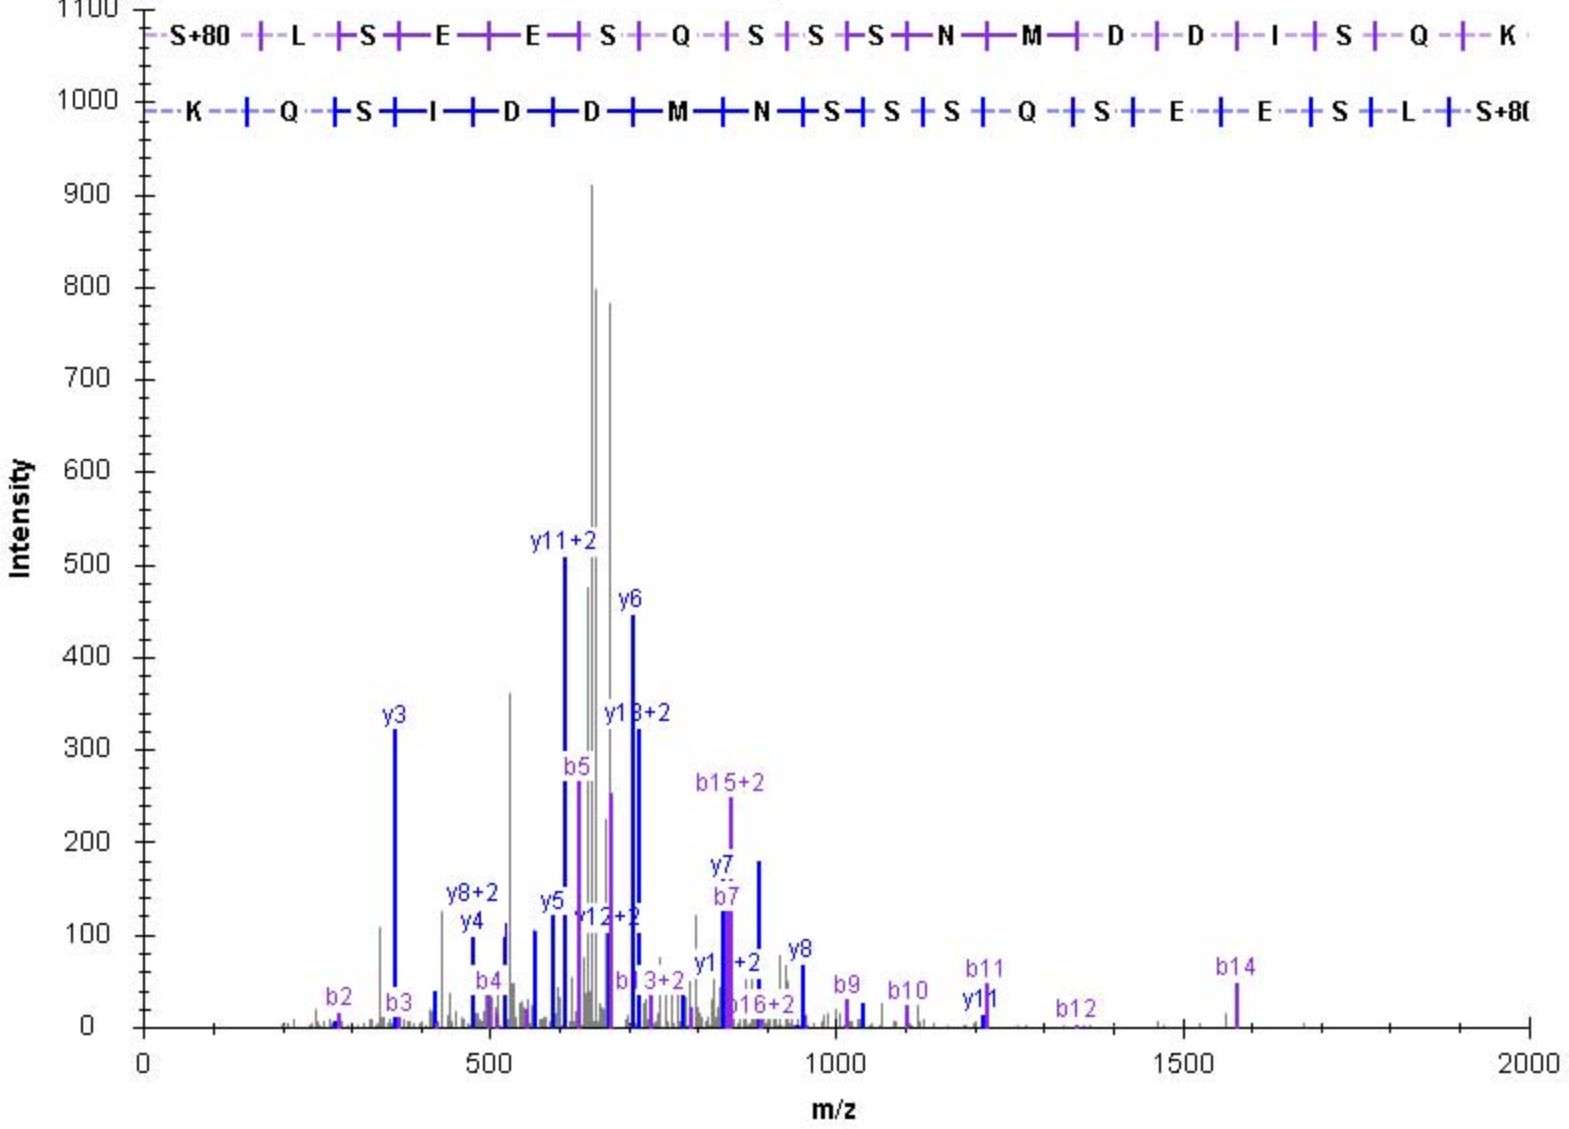

| b               | b(+2)           |    |   | y  | y(+2)           |                 |
|-----------------|-----------------|----|---|----|-----------------|-----------------|
| <b>88.039</b>   | 44.523          | 1  | S | 30 | 3239.448        | 1620.228        |
| 201.123         | 101.065         | 2  | L | 29 | 3152.416        | 1576.712        |
| 288.155         | 144.581         | 3  | S | 28 | 3039.332        | 1520.170        |
| <b>417.198</b>  | 209.103         | 4  | E | 27 | 2952.300        | 1476.654        |
| 546.241         | 273.624         | 5  | E | 26 | 2823.257        | <b>1412.132</b> |
| <b>633.273</b>  | 317.140         | 6  | S | 25 | 2694.215        | <b>1347.611</b> |
| <b>761.331</b>  | <b>381.169</b>  | 7  | Q | 24 | 2607.183        | <b>1304.095</b> |
| <b>848.363</b>  | 424.685         | 8  | S | 23 | 2479.124        | <b>1240.066</b> |
| 935.395         | 468.201         | 9  | S | 22 | 2392.092        | <b>1196.550</b> |
| 1022.427        | 511.717         | 10 | S | 21 | 2305.060        | <b>1153.034</b> |
| <b>1136.470</b> | 568.739         | 11 | N | 20 | 2218.028        | <b>1109.518</b> |
| 1267.511        | <b>634.259</b>  | 12 | M | 19 | 2103.985        | <b>1052.496</b> |
| <b>1382.538</b> | 691.772         | 13 | D | 18 | 1972.945        | <b>986.976</b>  |
| <b>1497.565</b> | <b>749.286</b>  | 14 | D | 17 | <b>1857.918</b> | <b>929.463</b>  |
| <b>1610.649</b> | 805.828         | 15 | I | 16 | <b>1742.891</b> | <b>871.949</b>  |
| <b>1697.681</b> | <b>849.344</b>  | 16 | S | 15 | 1629.807        | <b>815.407</b>  |
| 1825.739        | <b>913.373</b>  | 17 | Q | 14 | <b>1542.775</b> | 771.891         |
| 1953.834        | 977.421         | 18 | K | 13 | <b>1414.716</b> | <b>707.862</b>  |
| 2120.866        | <b>1060.937</b> | 19 | S | 12 | <b>1286.621</b> | 643.814         |
| 2233.950        | 1117.479        | 20 | I | 11 | <b>1119.589</b> | 560.298         |
| 2320.982        | <b>1160.995</b> | 21 | S | 10 | <b>1006.505</b> | 503.756         |
| 2434.066        | <b>1217.537</b> | 22 | L | 9  | <b>919.473</b>  | 460.240         |
| 2491.088        | <b>1246.048</b> | 23 | G | 8  | <b>806.389</b>  | 403.698         |
| 2606.115        | 1303.561        | 24 | D | 7  | <b>749.368</b>  | 375.187         |
| 2677.152        | 1339.080        | 25 | A | 6  | <b>634.341</b>  | 317.674         |
| 2764.184        | <b>1382.596</b> | 26 | S | 5  | <b>563.304</b>  | 282.155         |
| 2893.227        | 1447.117        | 27 | E | 4  | 476.271         | 238.639         |
| 3006.311        | 1503.659        | 28 | I | 3  | <b>347.229</b>  | 174.118         |
| 3093.343        | 1547.175        | 29 | S | 2  | 234.145         | 117.576         |
| 3221.438        | <b>1611.222</b> | 30 | K | 1  | 147.113         | 74.060          |

controllerType=0 controllerNumber=1 scan=10767

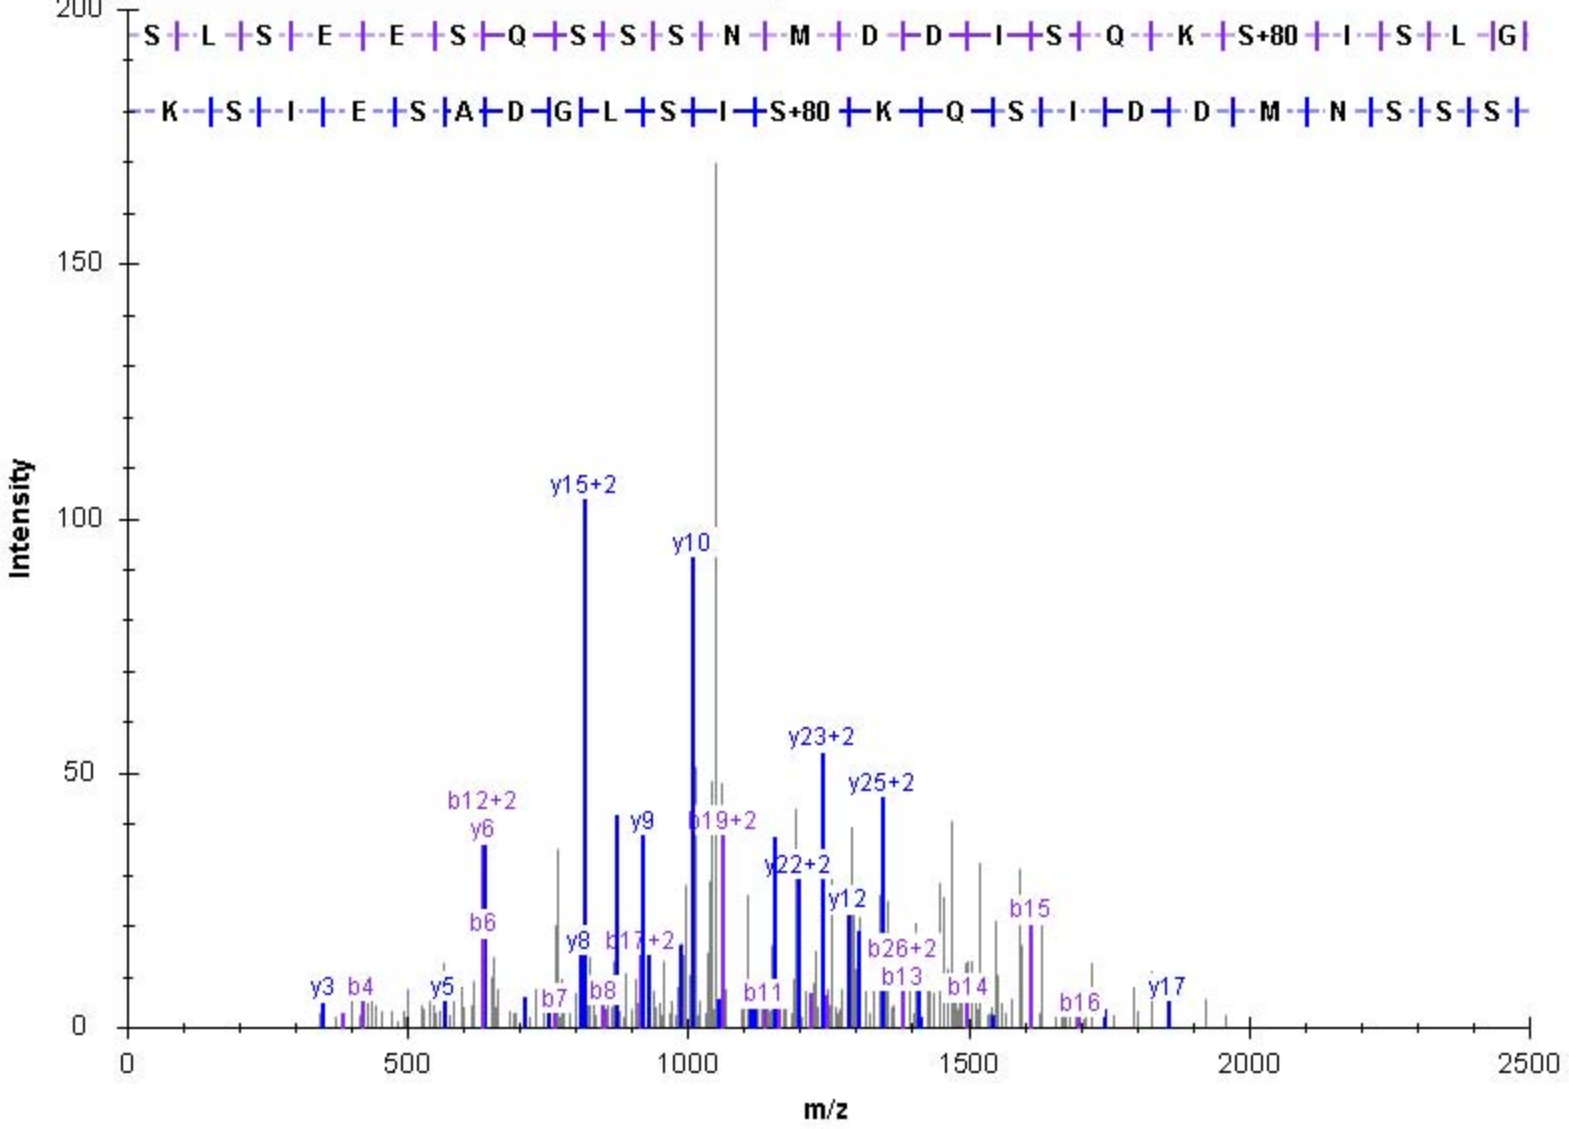



| b               | b(+2)          |    |   |    | y               | y(+2)          |
|-----------------|----------------|----|---|----|-----------------|----------------|
| <b>168.039</b>  | 84.523         | 1  | S | 12 | 1286.621        | <b>643.814</b> |
| <b>281.123</b>  | 141.065        | 2  | I | 11 | 1119.589        | <b>560.298</b> |
| <b>368.155</b>  | 184.581        | 3  | S | 10 | <b>1006.505</b> | <b>503.756</b> |
| <b>481.239</b>  | <b>241.123</b> | 4  | L | 9  | <b>919.473</b>  | 460.240        |
| <b>538.261</b>  | 269.634        | 5  | G | 8  | <b>806.389</b>  | <b>403.698</b> |
| 653.288         | <b>327.148</b> | 6  | D | 7  | <b>749.368</b>  | <b>375.187</b> |
| <b>724.325</b>  | 362.666        | 7  | A | 6  | <b>634.341</b>  | 317.674        |
| <b>811.357</b>  | <b>406.182</b> | 8  | S | 5  | <b>563.304</b>  | <b>282.155</b> |
| <b>940.400</b>  | <b>470.703</b> | 9  | E | 4  | <b>476.271</b>  | 238.639        |
| <b>1053.484</b> | <b>527.245</b> | 10 | I | 3  | <b>347.229</b>  | 174.118        |
| <b>1140.516</b> | <b>570.761</b> | 11 | S | 2  | <b>234.145</b>  | 117.576        |
| 1268.611        | <b>634.809</b> | 12 | K | 1  | 147.113         | 74.060         |

controllerType=0 controllerNumber=1 scan=8042

Intensity (10<sup>3</sup>)

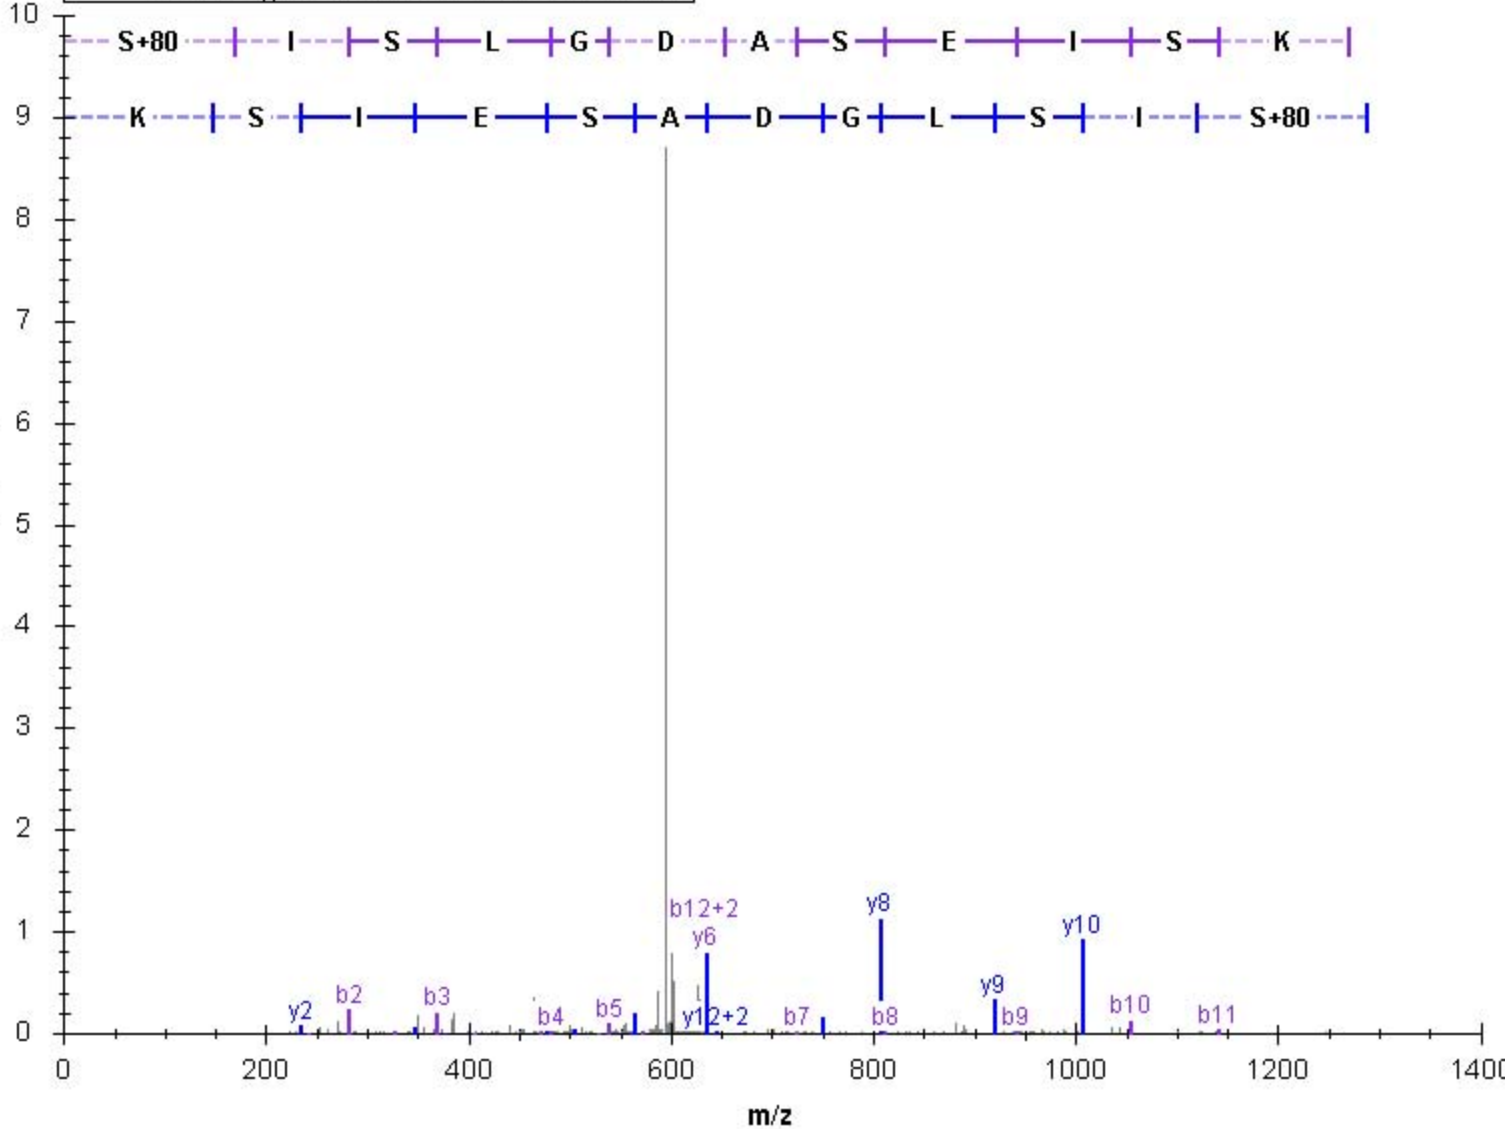

| b               | b(+2)          |    |   |    | y               | y(+2)          |
|-----------------|----------------|----|---|----|-----------------|----------------|
| 88.039          | 44.523         | 1  | S | 12 | 1286.621        | 643.814        |
| <b>201.123</b>  | 101.065        | 2  | I | 11 | 1199.589        | <b>600.298</b> |
| <b>368.155</b>  | 184.581        | 3  | S | 10 | <b>1086.505</b> | <b>543.756</b> |
| 481.239         | 241.123        | 4  | L | 9  | <b>919.473</b>  | <b>460.240</b> |
| <b>538.261</b>  | 269.634        | 5  | G | 8  | <b>806.389</b>  | 403.698        |
| <b>653.288</b>  | <b>327.148</b> | 6  | D | 7  | <b>749.368</b>  | 375.187        |
| <b>724.325</b>  | 362.666        | 7  | A | 6  | <b>634.341</b>  | 317.674        |
| <b>811.357</b>  | 406.182        | 8  | S | 5  | <b>563.304</b>  | 282.155        |
| 940.400         | <b>470.703</b> | 9  | E | 4  | <b>476.271</b>  | 238.639        |
| <b>1053.484</b> | 527.245        | 10 | I | 3  | <b>347.229</b>  | 174.118        |
| 1140.516        | 570.761        | 11 | S | 2  | <b>234.145</b>  | 117.576        |
| 1268.611        | <b>634.809</b> | 12 | K | 1  | 147.113         | 74.060         |

controllerType=0 controllerNumber=1 scan=10668

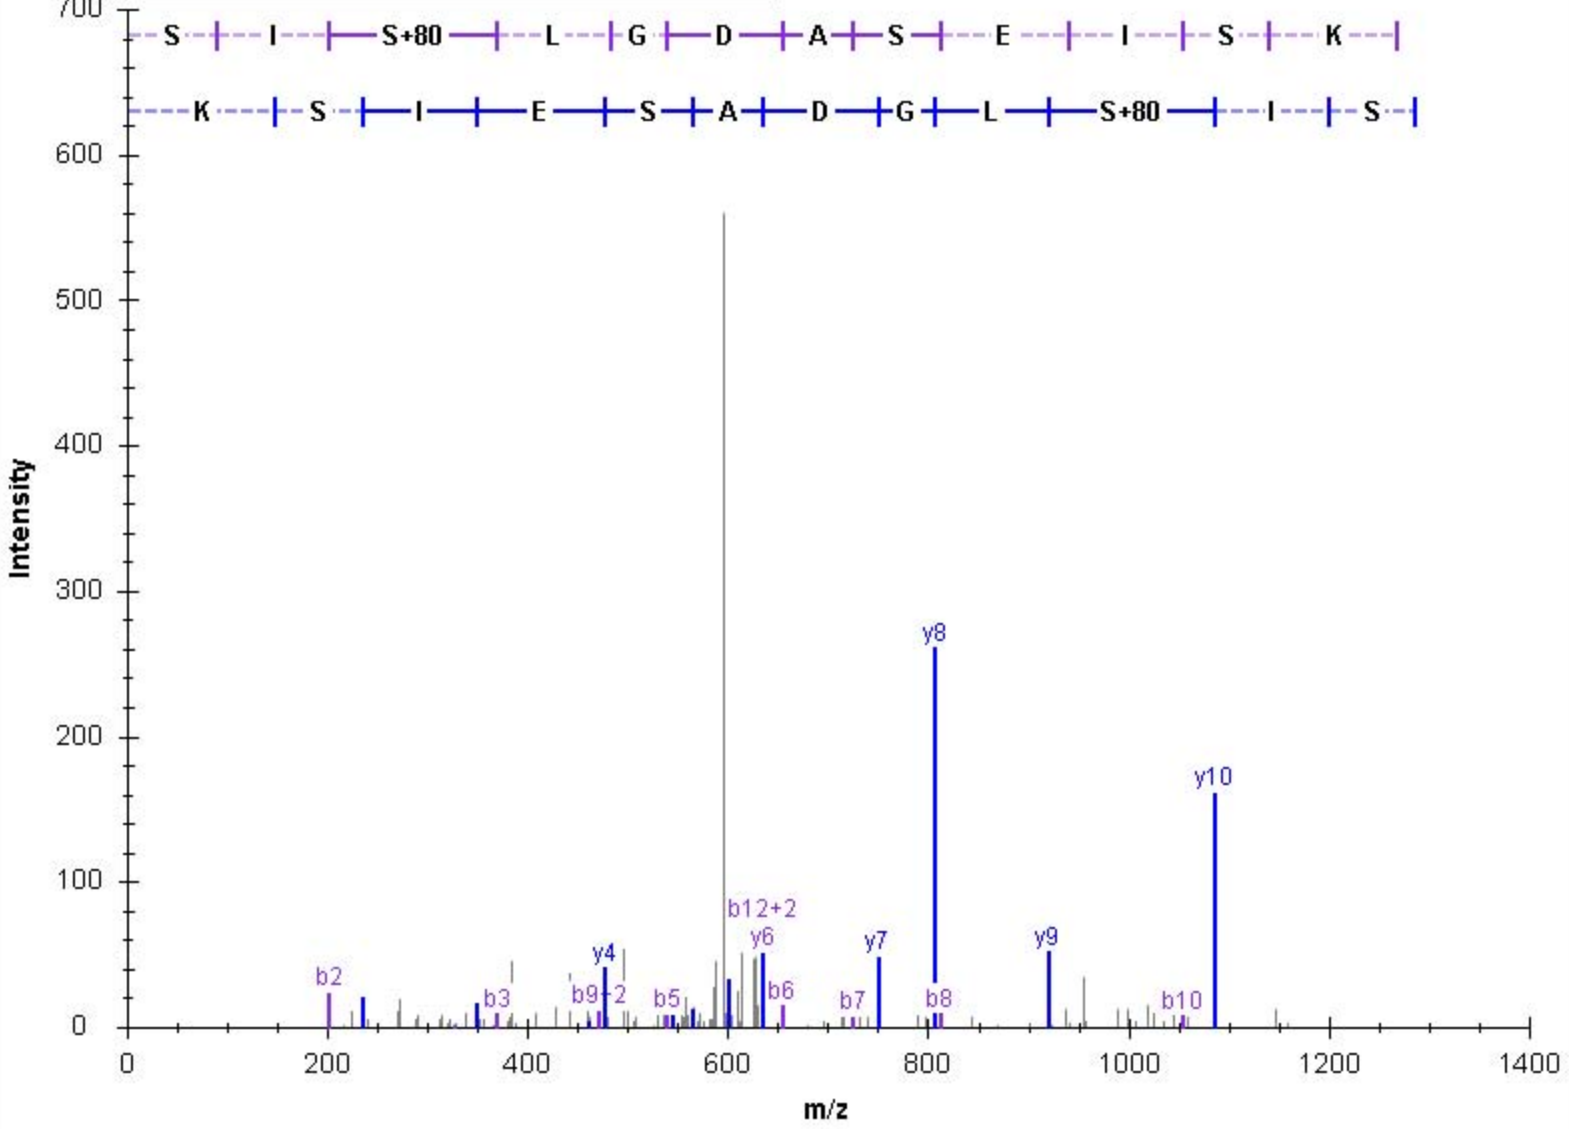

| b               | b(+2)          |    |   |    | y               | y(+2)          |
|-----------------|----------------|----|---|----|-----------------|----------------|
| <b>114.091</b>  | 57.549         | 1  | I | 18 | 2108.058        | 1054.533       |
| 211.144         | 106.076        | 2  | P | 17 | <b>1994.974</b> | <b>997.991</b> |
| <b>312.192</b>  | 156.600        | 3  | T | 16 | <b>1897.921</b> | <b>949.464</b> |
| <b>369.213</b>  | 185.110        | 4  | G | 15 | <b>1796.874</b> | 898.941        |
| <b>555.293</b>  | 278.150        | 5  | W | 14 | <b>1739.852</b> | <b>870.430</b> |
| <b>669.335</b>  | <b>335.171</b> | 6  | N | 13 | <b>1553.773</b> | 777.390        |
| <b>800.376</b>  | 400.692        | 7  | M | 12 | <b>1439.730</b> | <b>720.369</b> |
| 967.408         | <b>484.208</b> | 8  | S | 11 | <b>1308.690</b> | 654.848        |
| <b>1066.476</b> | 533.742        | 9  | V | 10 | <b>1141.658</b> | 571.332        |
| <b>1153.508</b> | 577.258        | 10 | S | 9  | <b>1042.589</b> | <b>521.798</b> |
| <b>1267.551</b> | 634.279        | 11 | N | 8  | <b>955.557</b>  | 478.282        |
| <b>1380.635</b> | 690.821        | 12 | L | 7  | <b>841.514</b>  | 421.261        |
| <b>1477.688</b> | <b>739.348</b> | 13 | P | 6  | <b>728.430</b>  | 364.719        |
| <b>1590.772</b> | <b>795.890</b> | 14 | L | 5  | <b>631.377</b>  | 316.192        |
| <b>1703.856</b> | <b>852.432</b> | 15 | L | 4  | <b>518.293</b>  | 259.650        |
| <b>1804.904</b> | <b>902.956</b> | 16 | T | 3  | <b>405.209</b>  | 203.108        |
| <b>1933.947</b> | 967.477        | 17 | E | 2  | <b>304.162</b>  | 152.584        |
| 2090.048        | 1045.527       | 18 | R | 1  | 175.119         | 88.063         |

controllerType=0 controllerNumber=1 scan=15034

Intensity (10<sup>3</sup>)

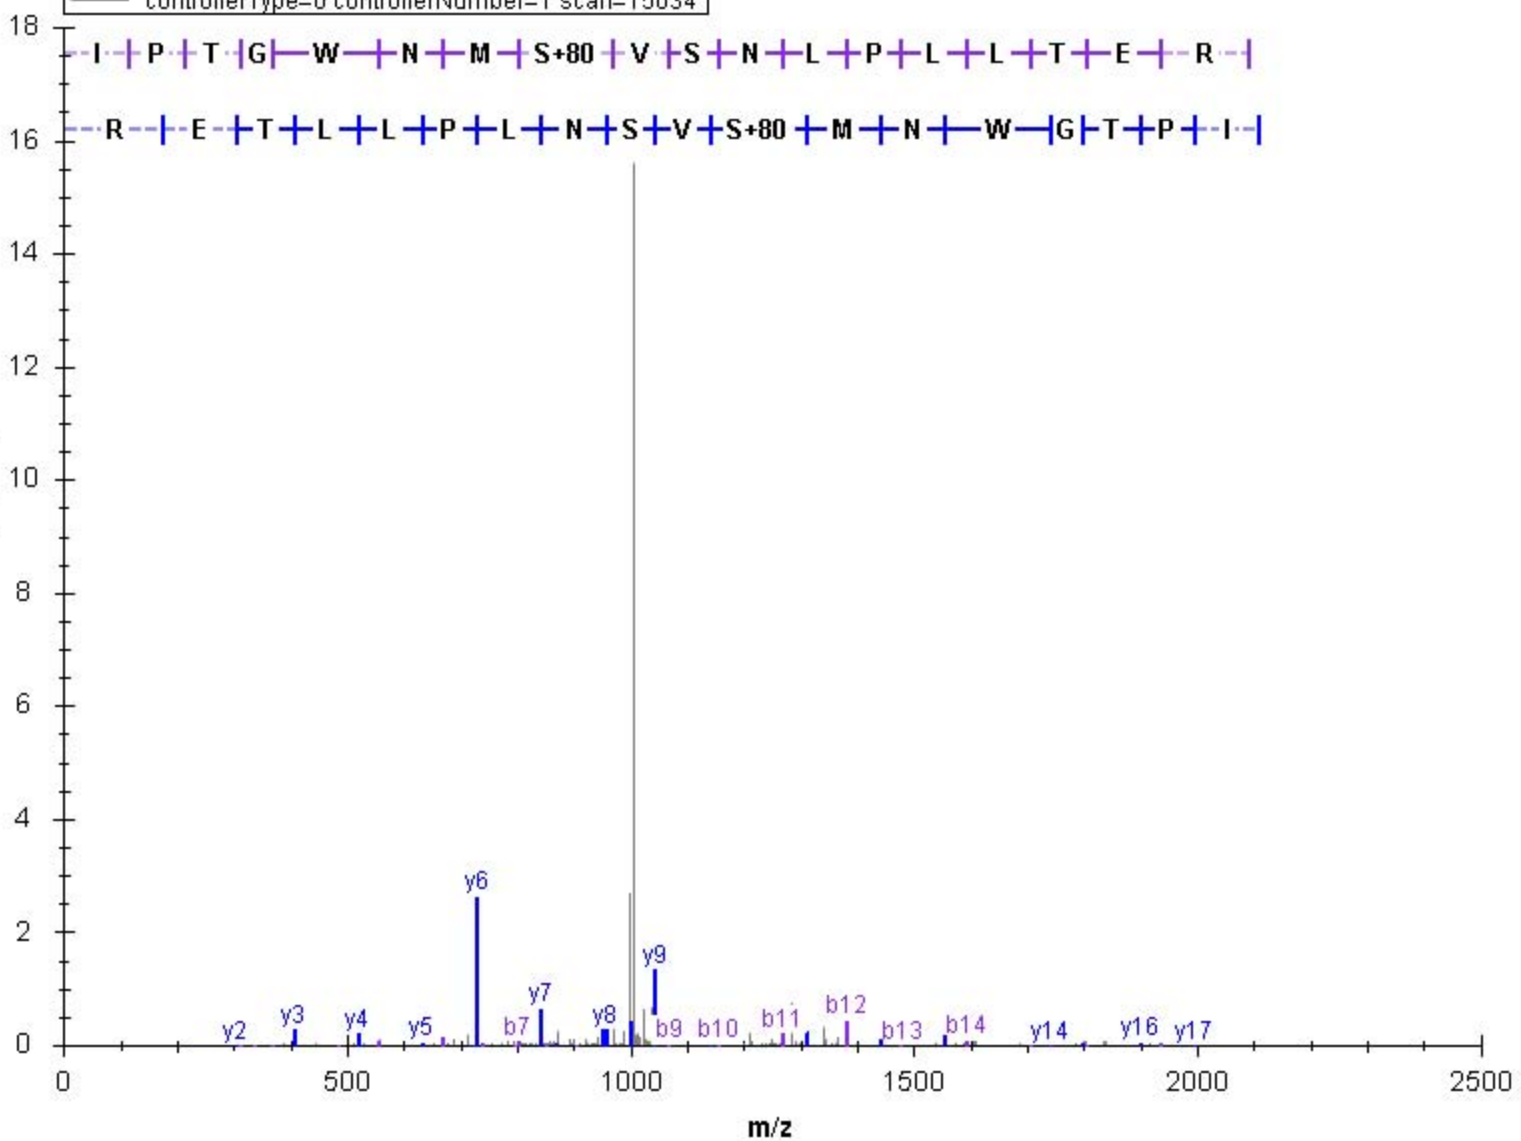

| b               | b(+2)           |    |   | y  | y(+2)           |                 |
|-----------------|-----------------|----|---|----|-----------------|-----------------|
| <b>116.034</b>  | 58.521          | 1  | D | 23 | 2780.142        | 1390.575        |
| 229.118         | 115.063         | 2  | L | 22 | 2665.115        | <b>1333.061</b> |
| 358.161         | 179.584         | 3  | E | 21 | 2552.031        | <b>1276.519</b> |
| 525.193         | 263.100         | 4  | S | 20 | 2422.988        | <b>1211.998</b> |
| 626.241         | 313.624         | 5  | T | 19 | 2255.956        | 1128.482        |
| <b>725.309</b>  | 363.158         | 6  | V | 18 | 2154.909        | 1077.958        |
| <b>840.336</b>  | 420.672         | 7  | D | 17 | 2055.840        | <b>1028.424</b> |
| <b>937.389</b>  | 469.198         | 8  | P | 16 | <b>1940.813</b> | <b>970.910</b>  |
| <b>1050.473</b> | 525.740         | 9  | L | 15 | <b>1843.761</b> | 922.384         |
| <b>1165.500</b> | 583.253         | 10 | D | 14 | <b>1730.677</b> | 865.842         |
| <b>1236.537</b> | 618.772         | 11 | A | 13 | <b>1615.650</b> | 808.328         |
| 1373.596        | 687.302         | 12 | H | 12 | <b>1544.613</b> | 772.810         |
| 1540.628        | 770.818         | 13 | S | 11 | <b>1407.554</b> | 704.280         |
| <b>1653.712</b> | 827.360         | 14 | I | 10 | <b>1240.522</b> | 620.764         |
| <b>1782.754</b> | 891.881         | 15 | E | 9  | <b>1127.438</b> | <b>564.222</b>  |
| 1911.797        | 956.402         | 16 | E | 8  | <b>998.395</b>  | 499.701         |
| 2040.840        | 1020.923        | 17 | E | 7  | <b>869.352</b>  | 435.180         |
| 2155.867        | 1078.437        | 18 | D | 6  | <b>740.310</b>  | 370.659         |
| 2270.893        | 1135.950        | 19 | D | 5  | <b>625.283</b>  | 313.145         |
| 2357.926        | 1179.466        | 20 | S | 4  | <b>510.256</b>  | 255.632         |
| 2486.968        | 1243.988        | 21 | E | 3  | 423.224         | 212.116         |
| 2634.037        | <b>1317.522</b> | 22 | F | 2  | 294.181         | 147.594         |
| 2762.131        | 1381.569        | 23 | K | 1  | 147.113         | 74.060          |

controllerType=0 controllerNumber=1 scan=12562

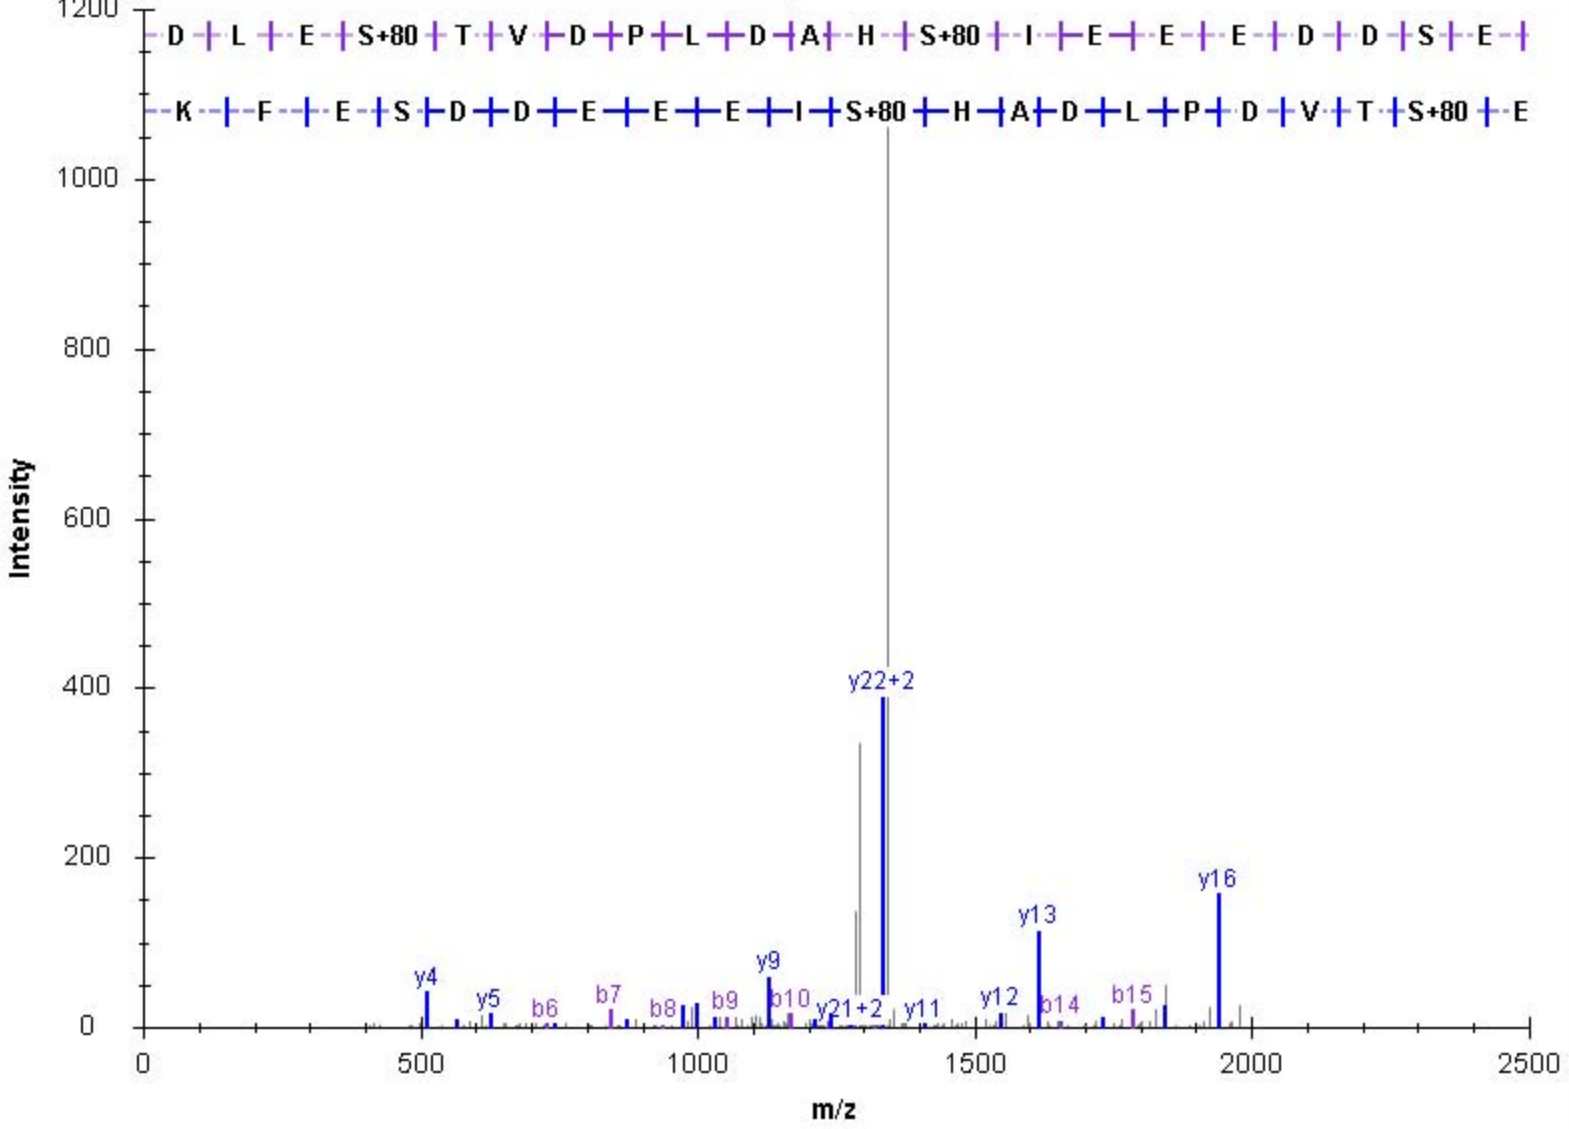



| b               | b(+2)           |    |   | y  | y(+2)           |                 |
|-----------------|-----------------|----|---|----|-----------------|-----------------|
| 116.034         | 58.521          | 1  | D | 23 | 2700.142        | 1350.575        |
| 229.118         | 115.063         | 2  | L | 22 | 2585.115        | <b>1293.061</b> |
| 358.161         | 179.584         | 3  | E | 21 | 2472.031        | <b>1236.519</b> |
| 525.193         | 263.100         | 4  | S | 20 | 2342.988        | <b>1171.998</b> |
| 626.241         | 313.624         | 5  | T | 19 | 2175.956        | <b>1088.482</b> |
| 725.309         | 363.158         | 6  | V | 18 | 2074.909        | 1037.958        |
| <b>840.336</b>  | 420.672         | 7  | D | 17 | <b>1975.840</b> | 988.424         |
| <b>937.389</b>  | 469.198         | 8  | P | 16 | <b>1860.813</b> | <b>930.910</b>  |
| <b>1050.473</b> | 525.740         | 9  | L | 15 | 1763.761        | 882.384         |
| <b>1165.500</b> | 583.253         | 10 | D | 14 | <b>1650.677</b> | <b>825.842</b>  |
| <b>1236.537</b> | 618.772         | 11 | A | 13 | <b>1535.650</b> | 768.328         |
| 1373.596        | 687.302         | 12 | H | 12 | <b>1464.613</b> | 732.810         |
| <b>1460.628</b> | 730.818         | 13 | S | 11 | <b>1327.554</b> | <b>664.280</b>  |
| <b>1573.712</b> | 787.360         | 14 | I | 10 | <b>1240.522</b> | 620.764         |
| <b>1702.754</b> | 851.881         | 15 | E | 9  | <b>1127.438</b> | 564.222         |
| <b>1831.797</b> | 916.402         | 16 | E | 8  | <b>998.395</b>  | 499.701         |
| 1960.840        | <b>980.923</b>  | 17 | E | 7  | <b>869.352</b>  | 435.180         |
| 2075.867        | 1038.437        | 18 | D | 6  | 740.310         | 370.659         |
| 2190.893        | <b>1095.950</b> | 19 | D | 5  | <b>625.283</b>  | 313.145         |
| 2277.926        | <b>1139.466</b> | 20 | S | 4  | <b>510.256</b>  | 255.632         |
| 2406.968        | 1203.988        | 21 | E | 3  | 423.224         | 212.116         |
| 2554.037        | 1277.522        | 22 | F | 2  | 294.181         | 147.594         |
| 2682.131        | 1341.569        | 23 | K | 1  | 147.113         | 74.060          |

controllerType=0 controllerNumber=1 scan=13832

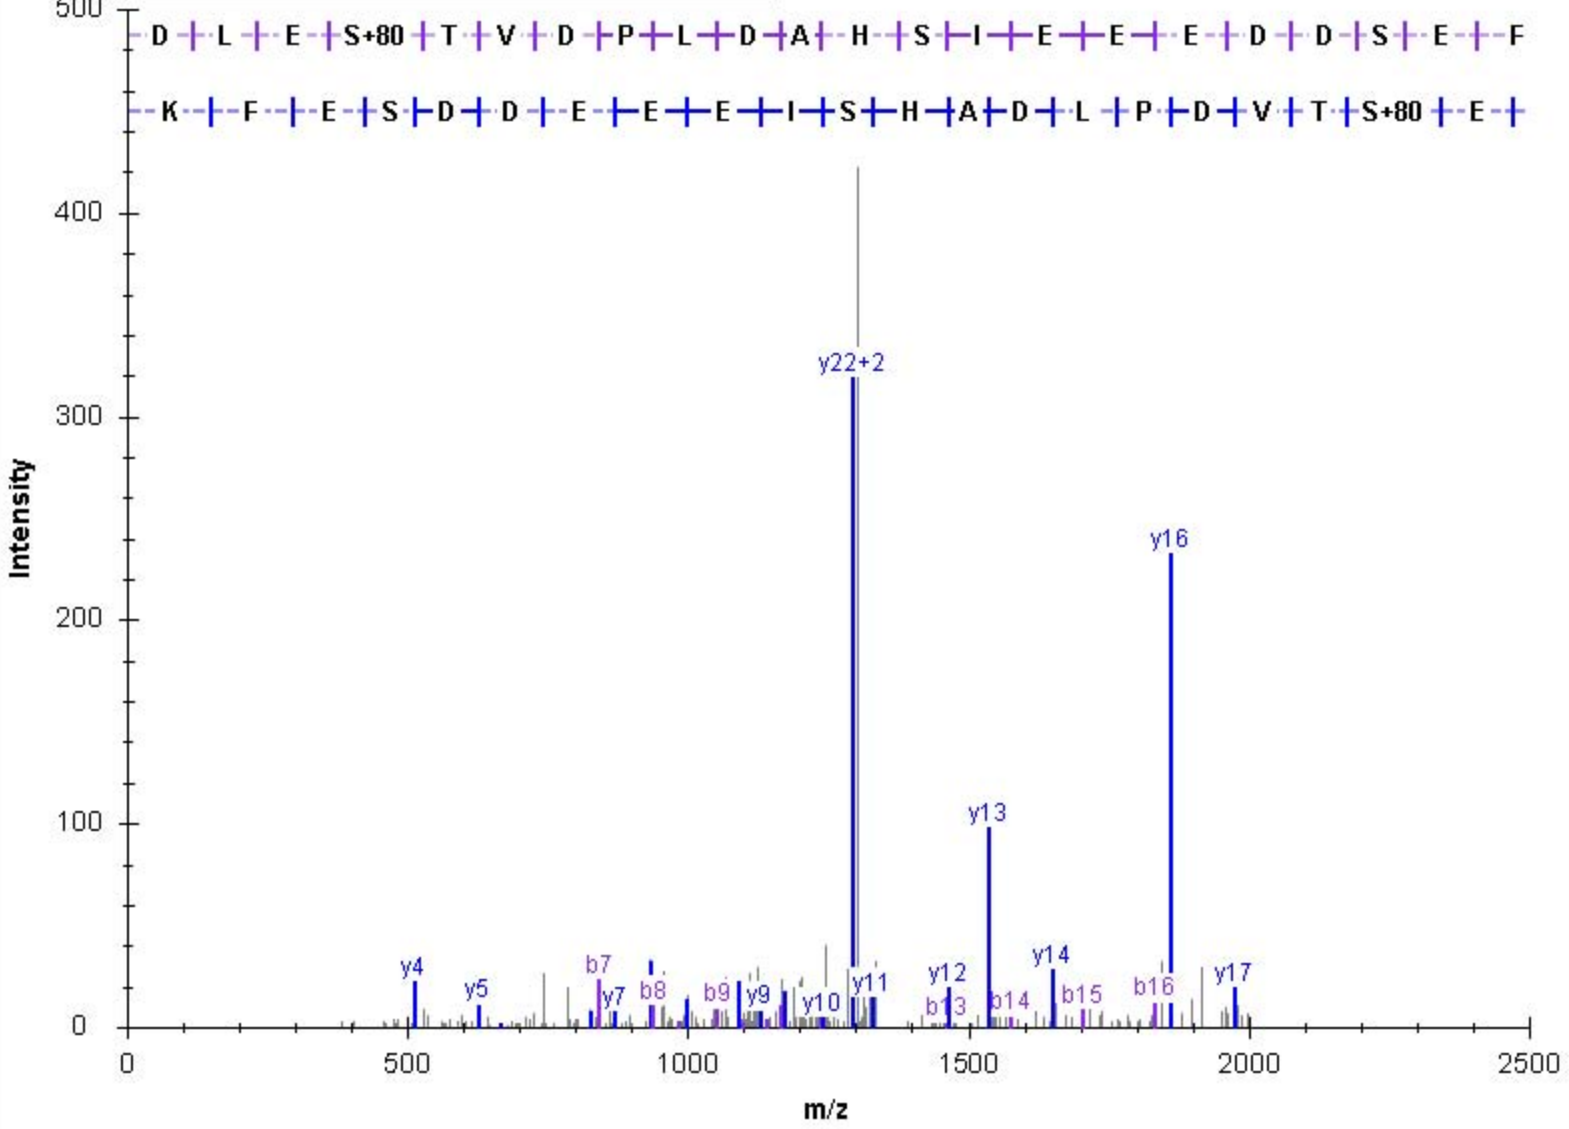

| b               | b(+2)           |    |   |    | y               | y(+2)           |
|-----------------|-----------------|----|---|----|-----------------|-----------------|
| <b>116.034</b>  | 58.521          | 1  | D | 23 | 2700.142        | 1350.575        |
| 229.118         | 115.063         | 2  | L | 22 | 2585.115        | <b>1293.061</b> |
| 358.161         | 179.584         | 3  | E | 21 | 2472.031        | <b>1236.519</b> |
| 445.193         | 223.100         | 4  | S | 20 | 2342.988        | <b>1171.998</b> |
| <b>546.241</b>  | 273.624         | 5  | T | 19 | 2255.956        | <b>1128.482</b> |
| <b>645.309</b>  | 323.158         | 6  | V | 18 | 2154.909        | <b>1077.958</b> |
| <b>760.336</b>  | 380.672         | 7  | D | 17 | 2055.840        | <b>1028.424</b> |
| <b>857.389</b>  | 429.198         | 8  | P | 16 | <b>1940.813</b> | <b>970.910</b>  |
| <b>970.473</b>  | 485.740         | 9  | L | 15 | <b>1843.761</b> | <b>922.384</b>  |
| <b>1085.500</b> | 543.253         | 10 | D | 14 | <b>1730.677</b> | 865.842         |
| <b>1156.537</b> | <b>578.772</b>  | 11 | A | 13 | <b>1615.650</b> | 808.328         |
| <b>1293.596</b> | 647.302         | 12 | H | 12 | 1544.613        | 772.810         |
| <b>1460.628</b> | 730.818         | 13 | S | 11 | <b>1407.554</b> | 704.280         |
| <b>1573.712</b> | 787.360         | 14 | I | 10 | <b>1240.522</b> | 620.764         |
| <b>1702.754</b> | <b>851.881</b>  | 15 | E | 9  | <b>1127.438</b> | <b>564.222</b>  |
| <b>1831.797</b> | 916.402         | 16 | E | 8  | <b>998.395</b>  | 499.701         |
| <b>1960.840</b> | <b>980.923</b>  | 17 | E | 7  | <b>869.352</b>  | <b>435.180</b>  |
| 2075.867        | 1038.437        | 18 | D | 6  | <b>740.310</b>  | 370.659         |
| 2190.893        | 1095.950        | 19 | D | 5  | <b>625.283</b>  | 313.145         |
| 2277.926        | 1139.466        | 20 | S | 4  | <b>510.256</b>  | 255.632         |
| 2406.968        | 1203.988        | 21 | E | 3  | <b>423.224</b>  | 212.116         |
| 2554.037        | <b>1277.522</b> | 22 | F | 2  | 294.181         | 147.594         |
| 2682.131        | 1341.569        | 23 | K | 1  | 147.113         | 74.060          |

controllerType=0 controllerNumber=1 scan=11741

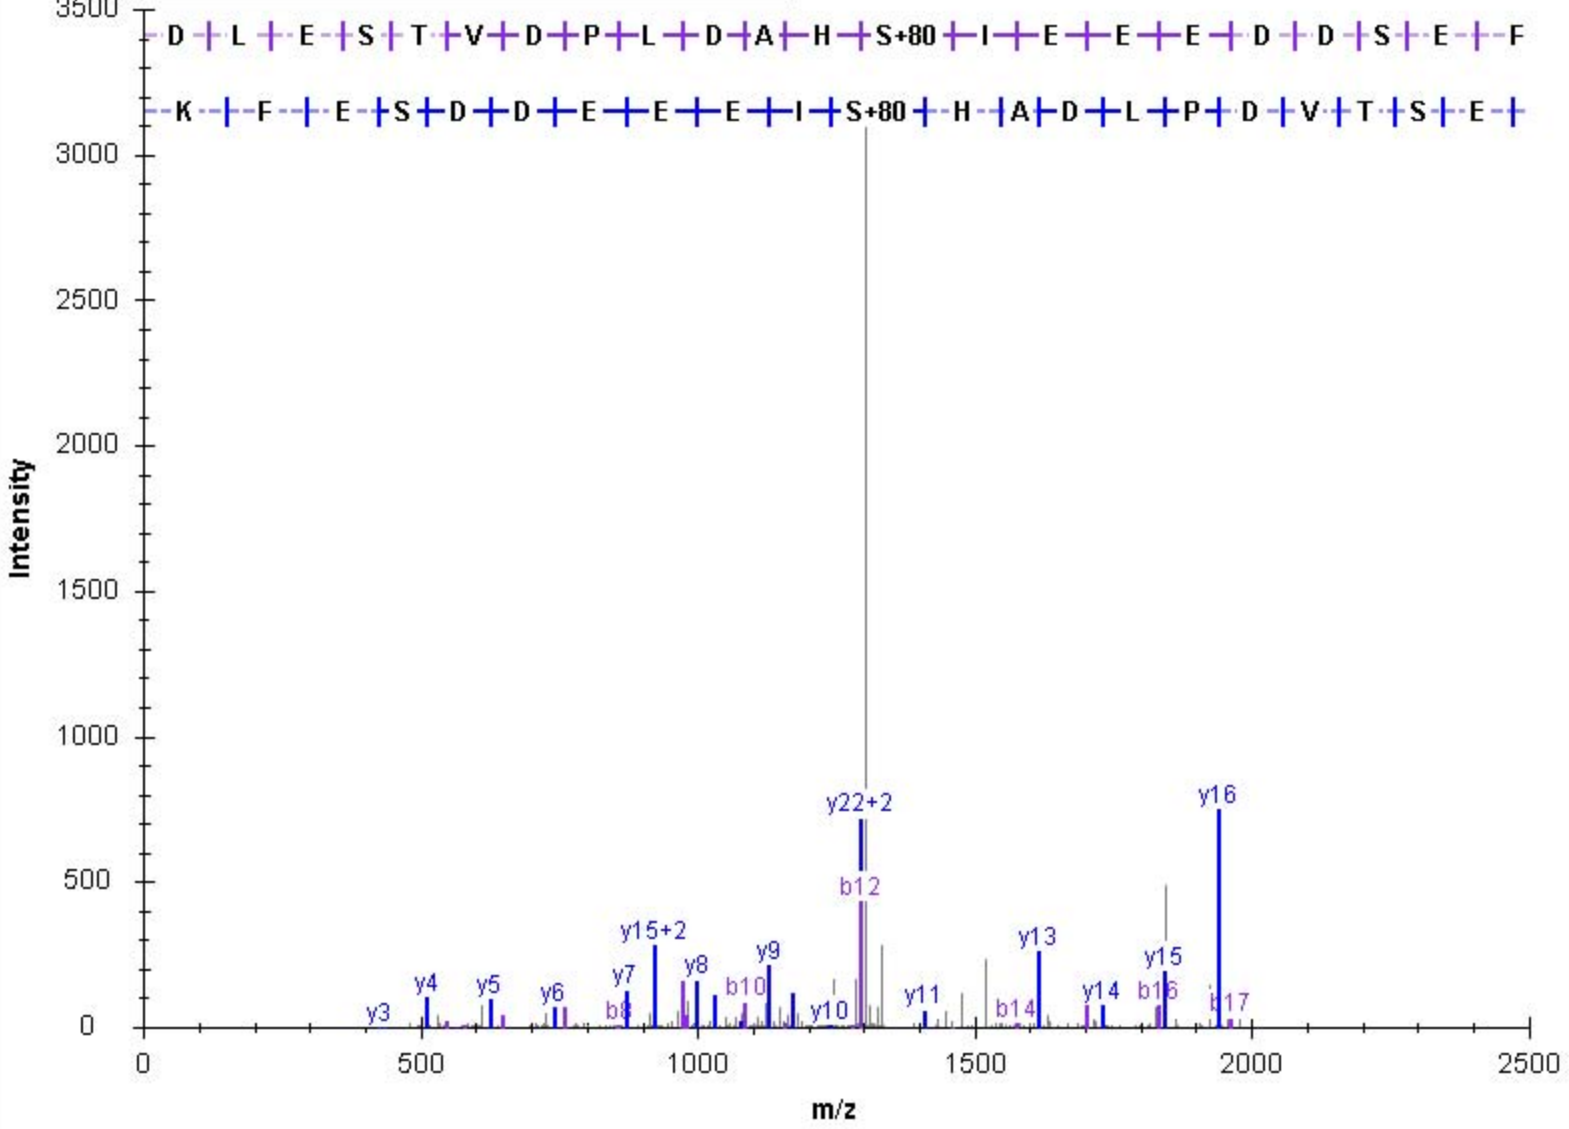

| b               | b(+2)           |    |   | y  | y(+2)           |                 |
|-----------------|-----------------|----|---|----|-----------------|-----------------|
| <b>116.034</b>  | 58.521          | 1  | D | 35 | 3927.719        | 1964.363        |
| 229.118         | 115.063         | 2  | L | 34 | 3812.692        | 1906.850        |
| 358.161         | 179.584         | 3  | E | 33 | 3699.608        | 1850.308        |
| 525.193         | 263.100         | 4  | S | 32 | 3570.566        | <b>1785.786</b> |
| 626.241         | 313.624         | 5  | T | 31 | 3403.534        | <b>1702.270</b> |
| <b>725.309</b>  | 363.158         | 6  | V | 30 | 3302.486        | <b>1651.747</b> |
| <b>840.336</b>  | 420.672         | 7  | D | 29 | 3203.418        | <b>1602.212</b> |
| <b>937.389</b>  | 469.198         | 8  | P | 28 | 3088.391        | <b>1544.699</b> |
| 1050.473        | 525.740         | 9  | L | 27 | 2991.338        | 1496.173        |
| <b>1165.500</b> | <b>583.253</b>  | 10 | D | 26 | 2878.254        | <b>1439.631</b> |
| <b>1236.537</b> | 618.772         | 11 | A | 25 | 2763.227        | <b>1382.117</b> |
| <b>1373.596</b> | 687.302         | 12 | H | 24 | 2692.190        | <b>1346.598</b> |
| 1460.628        | 730.818         | 13 | S | 23 | 2555.131        | <b>1278.069</b> |
| <b>1573.712</b> | 787.360         | 14 | I | 22 | 2468.099        | <b>1234.553</b> |
| <b>1702.754</b> | <b>851.881</b>  | 15 | E | 21 | 2355.015        | <b>1178.011</b> |
| <b>1831.797</b> | <b>916.402</b>  | 16 | E | 20 | 2225.972        | <b>1113.490</b> |
| <b>1960.840</b> | 980.923         | 17 | E | 19 | 2096.929        | <b>1048.968</b> |
| 2075.867        | 1038.437        | 18 | D | 18 | 1967.887        | 984.447         |
| 2190.893        | <b>1095.950</b> | 19 | D | 17 | <b>1852.860</b> | <b>926.934</b>  |
| 2277.926        | 1139.466        | 20 | S | 16 | <b>1737.833</b> | <b>869.420</b>  |
| 2406.968        | 1203.988        | 21 | E | 15 | 1650.801        | <b>825.904</b>  |
| 2554.037        | <b>1277.522</b> | 22 | F | 14 | <b>1521.758</b> | <b>761.383</b>  |
| 2682.131        | <b>1341.569</b> | 23 | K | 13 | 1374.690        | 687.849         |
| 2797.158        | 1399.083        | 24 | D | 12 | <b>1246.595</b> | 623.801         |
| 2896.227        | <b>1448.617</b> | 25 | V | 11 | <b>1131.568</b> | 566.288         |
| 2967.264        | <b>1484.136</b> | 26 | A | 10 | <b>1032.500</b> | 516.753         |
| 3064.317        | <b>1532.662</b> | 27 | P | 9  | <b>961.463</b>  | 481.235         |
| 3121.338        | <b>1561.173</b> | 28 | G | 8  | <b>864.410</b>  | 432.709         |
| 3208.370        | <b>1604.689</b> | 29 | S | 7  | 807.388         | 404.198         |
| 3371.434        | <b>1686.220</b> | 30 | Y | 6  | <b>720.356</b>  | 360.682         |
| 3468.486        | <b>1734.747</b> | 31 | P | 5  | <b>557.293</b>  | 279.150         |
| 3597.529        | <b>1799.268</b> | 32 | E | 4  | 460.240         | 230.624         |

controllerType=0 controllerNumber=1 scan=10728

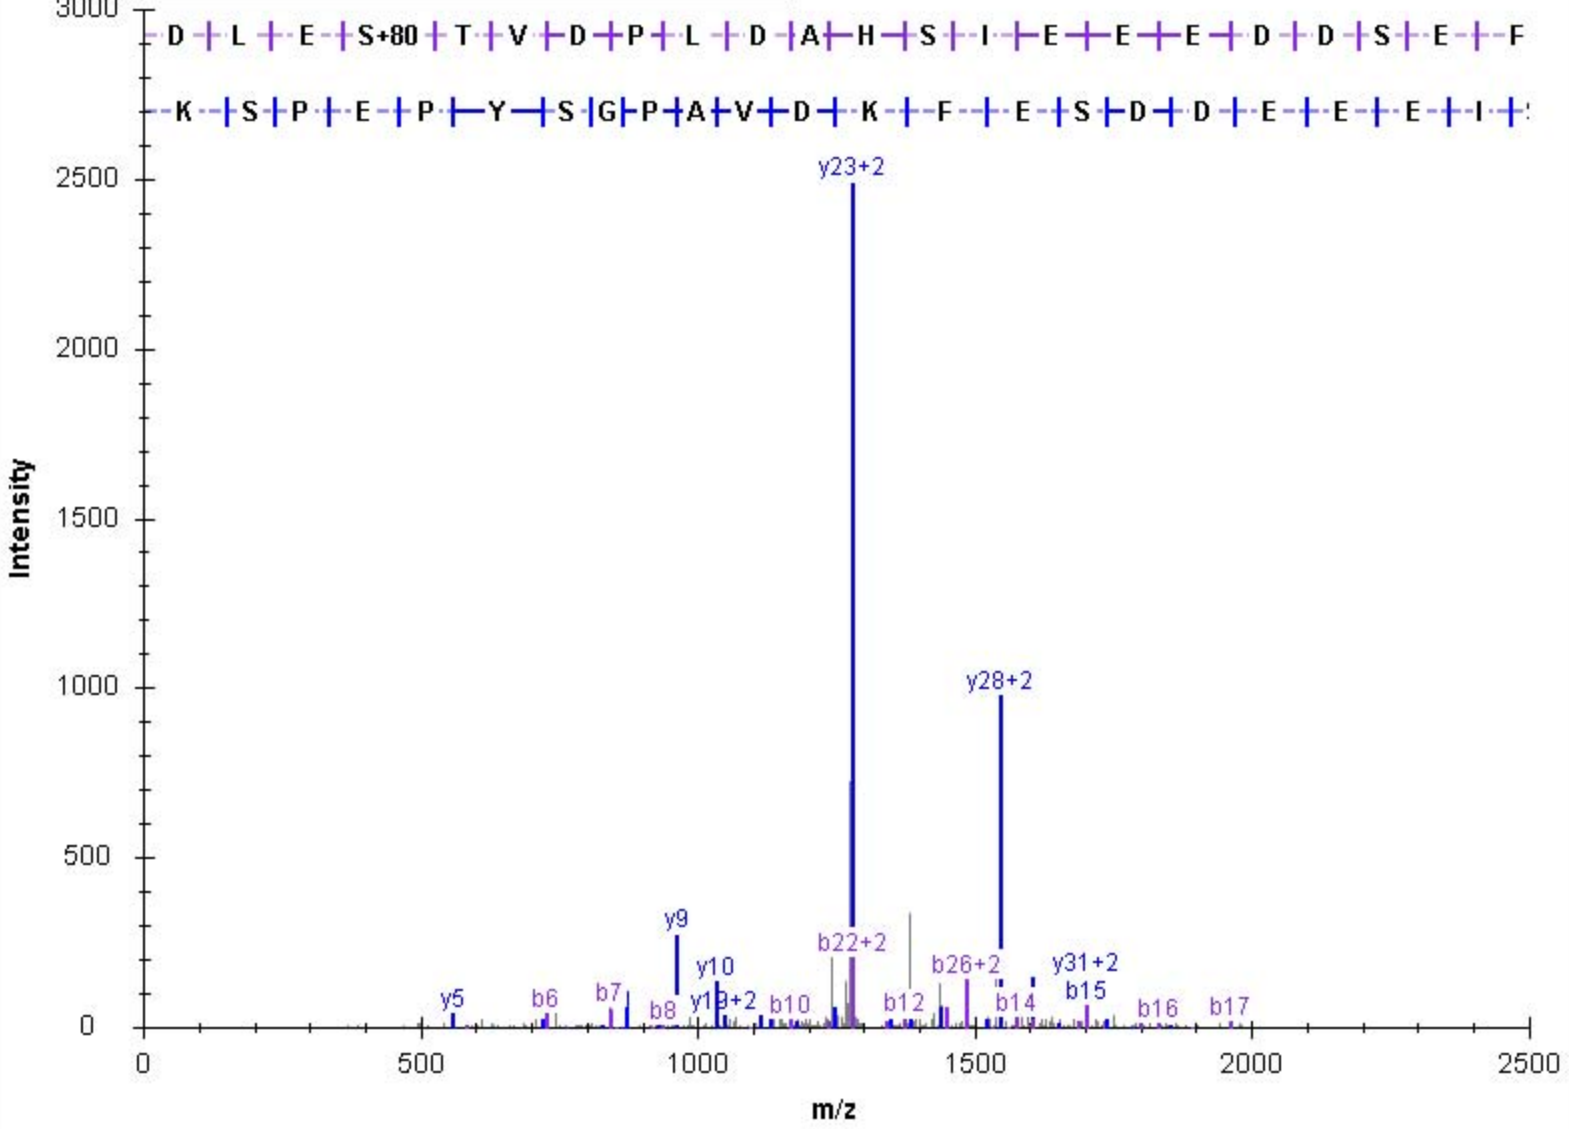

| b               | b(+2)           |    |   | y  | y(+2)           |                 |
|-----------------|-----------------|----|---|----|-----------------|-----------------|
| <b>116.034</b>  | 58.521          | 1  | D | 35 | 3927.719        | 1964.363        |
| 229.118         | 115.063         | 2  | L | 34 | 3812.692        | 1906.850        |
| 358.161         | 179.584         | 3  | E | 33 | 3699.608        | 1850.308        |
| <b>445.193</b>  | 223.100         | 4  | S | 32 | 3570.566        | <b>1785.786</b> |
| 546.241         | 273.624         | 5  | T | 31 | 3483.534        | 1742.270        |
| <b>645.309</b>  | 323.158         | 6  | V | 30 | 3382.486        | <b>1691.747</b> |
| <b>760.336</b>  | 380.672         | 7  | D | 29 | 3283.418        | <b>1642.212</b> |
| 857.389         | 429.198         | 8  | P | 28 | 3168.391        | <b>1584.699</b> |
| <b>970.473</b>  | 485.740         | 9  | L | 27 | 3071.338        | <b>1536.173</b> |
| <b>1085.500</b> | 543.253         | 10 | D | 26 | 2958.254        | 1479.631        |
| <b>1156.537</b> | 578.772         | 11 | A | 25 | 2843.227        | <b>1422.117</b> |
| <b>1293.596</b> | 647.302         | 12 | H | 24 | 2772.190        | <b>1386.598</b> |
| <b>1460.628</b> | 730.818         | 13 | S | 23 | 2635.131        | <b>1318.069</b> |
| <b>1573.712</b> | 787.360         | 14 | I | 22 | 2468.099        | <b>1234.553</b> |
| <b>1702.754</b> | 851.881         | 15 | E | 21 | 2355.015        | <b>1178.011</b> |
| <b>1831.797</b> | <b>916.402</b>  | 16 | E | 20 | 2225.972        | <b>1113.490</b> |
| <b>1960.840</b> | 980.923         | 17 | E | 19 | 2096.929        | <b>1048.968</b> |
| 2075.867        | 1038.437        | 18 | D | 18 | 1967.887        | <b>984.447</b>  |
| 2190.893        | 1095.950        | 19 | D | 17 | <b>1852.860</b> | <b>926.934</b>  |
| 2277.926        | 1139.466        | 20 | S | 16 | <b>1737.833</b> | <b>869.420</b>  |
| 2406.968        | 1203.988        | 21 | E | 15 | <b>1650.801</b> | 825.904         |
| 2554.037        | <b>1277.522</b> | 22 | F | 14 | <b>1521.758</b> | <b>761.383</b>  |
| 2682.131        | 1341.569        | 23 | K | 13 | 1374.690        | <b>687.849</b>  |
| 2797.158        | <b>1399.083</b> | 24 | D | 12 | <b>1246.595</b> | 623.801         |
| 2896.227        | <b>1448.617</b> | 25 | V | 11 | <b>1131.568</b> | 566.288         |
| 2967.264        | <b>1484.136</b> | 26 | A | 10 | <b>1032.500</b> | 516.753         |
| 3064.317        | 1532.662        | 27 | P | 9  | <b>961.463</b>  | <b>481.235</b>  |
| 3121.338        | 1561.173        | 28 | G | 8  | <b>864.410</b>  | 432.709         |
| 3208.370        | <b>1604.689</b> | 29 | S | 7  | <b>807.388</b>  | 404.198         |
| 3371.434        | <b>1686.220</b> | 30 | Y | 6  | <b>720.356</b>  | 360.682         |
| 3468.486        | 1734.747        | 31 | P | 5  | <b>557.293</b>  | 279.150         |
| 3597.529        | <b>1799.268</b> | 32 | E | 4  | 460.240         | 230.624         |

controllerType=0 controllerNumber=1 scan=13475

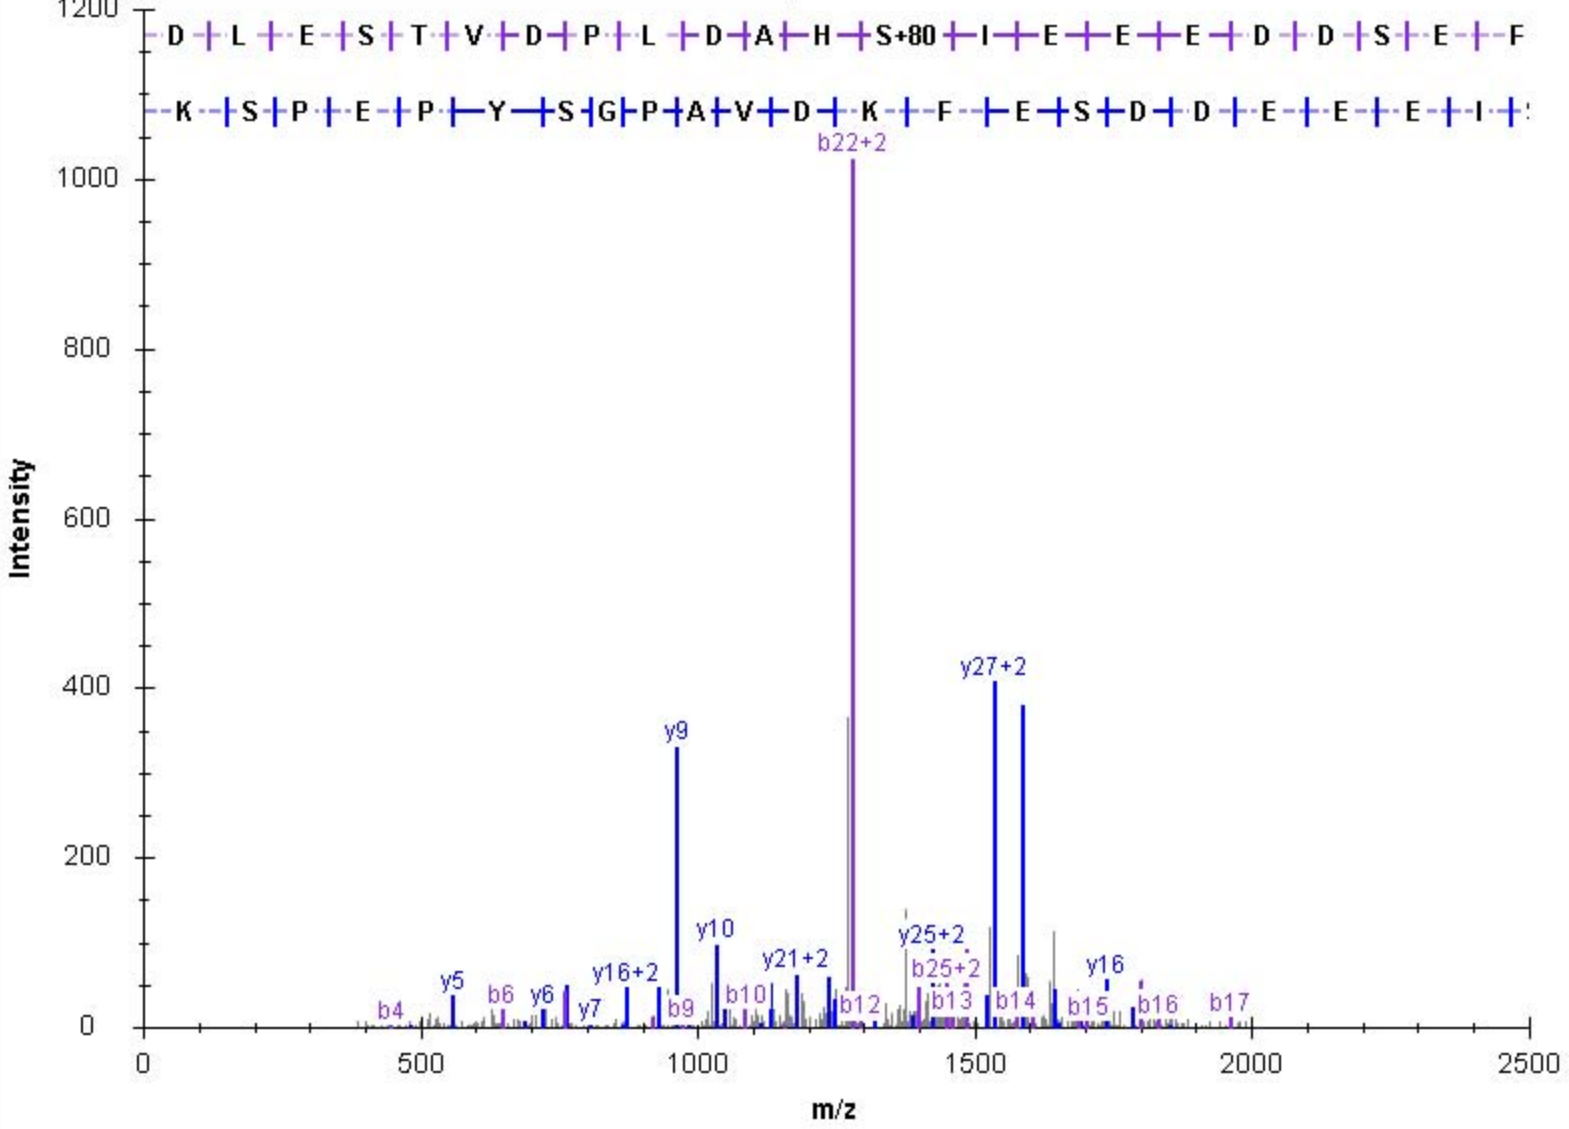



| b               | b(+2)          |    |   |    | y               | y(+2)          |
|-----------------|----------------|----|---|----|-----------------|----------------|
| 102.055         | 51.531         | 1  | T | 14 | 1688.771        | 844.889        |
| 215.139         | 108.073        | 2  | I | 13 | 1587.723        | 794.365        |
| 328.223         | 164.615        | 3  | L | 12 | 1474.639        | <b>737.823</b> |
| <b>415.255</b>  | 208.131        | 4  | S | 11 | <b>1361.555</b> | <b>681.281</b> |
| <b>530.282</b>  | 265.645        | 5  | D | 10 | <b>1274.523</b> | 637.765        |
| <b>658.377</b>  | 329.692        | 6  | K | 9  | <b>1159.496</b> | <b>580.252</b> |
| <b>786.472</b>  | 393.740        | 7  | K | 8  | <b>1031.401</b> | 516.204        |
| <b>901.499</b>  | 451.253        | 8  | D | 7  | <b>903.306</b>  | 452.157        |
| <b>1016.526</b> | <b>508.767</b> | 9  | D | 6  | <b>788.279</b>  | 394.643        |
| <b>1183.558</b> | 592.283        | 10 | S | 5  | <b>673.253</b>  | 337.130        |
| <b>1312.600</b> | 656.804        | 11 | E | 4  | <b>506.221</b>  | 253.614        |
| <b>1427.627</b> | 714.317        | 12 | D | 3  | <b>377.178</b>  | 189.093        |
| <b>1514.659</b> | 757.833        | 13 | S | 2  | <b>262.151</b>  | 131.579        |
| 1670.761        | <b>835.884</b> | 14 | R | 1  | 175.119         | 88.063         |

controllerType=0 controllerNumber=1 scan=8308

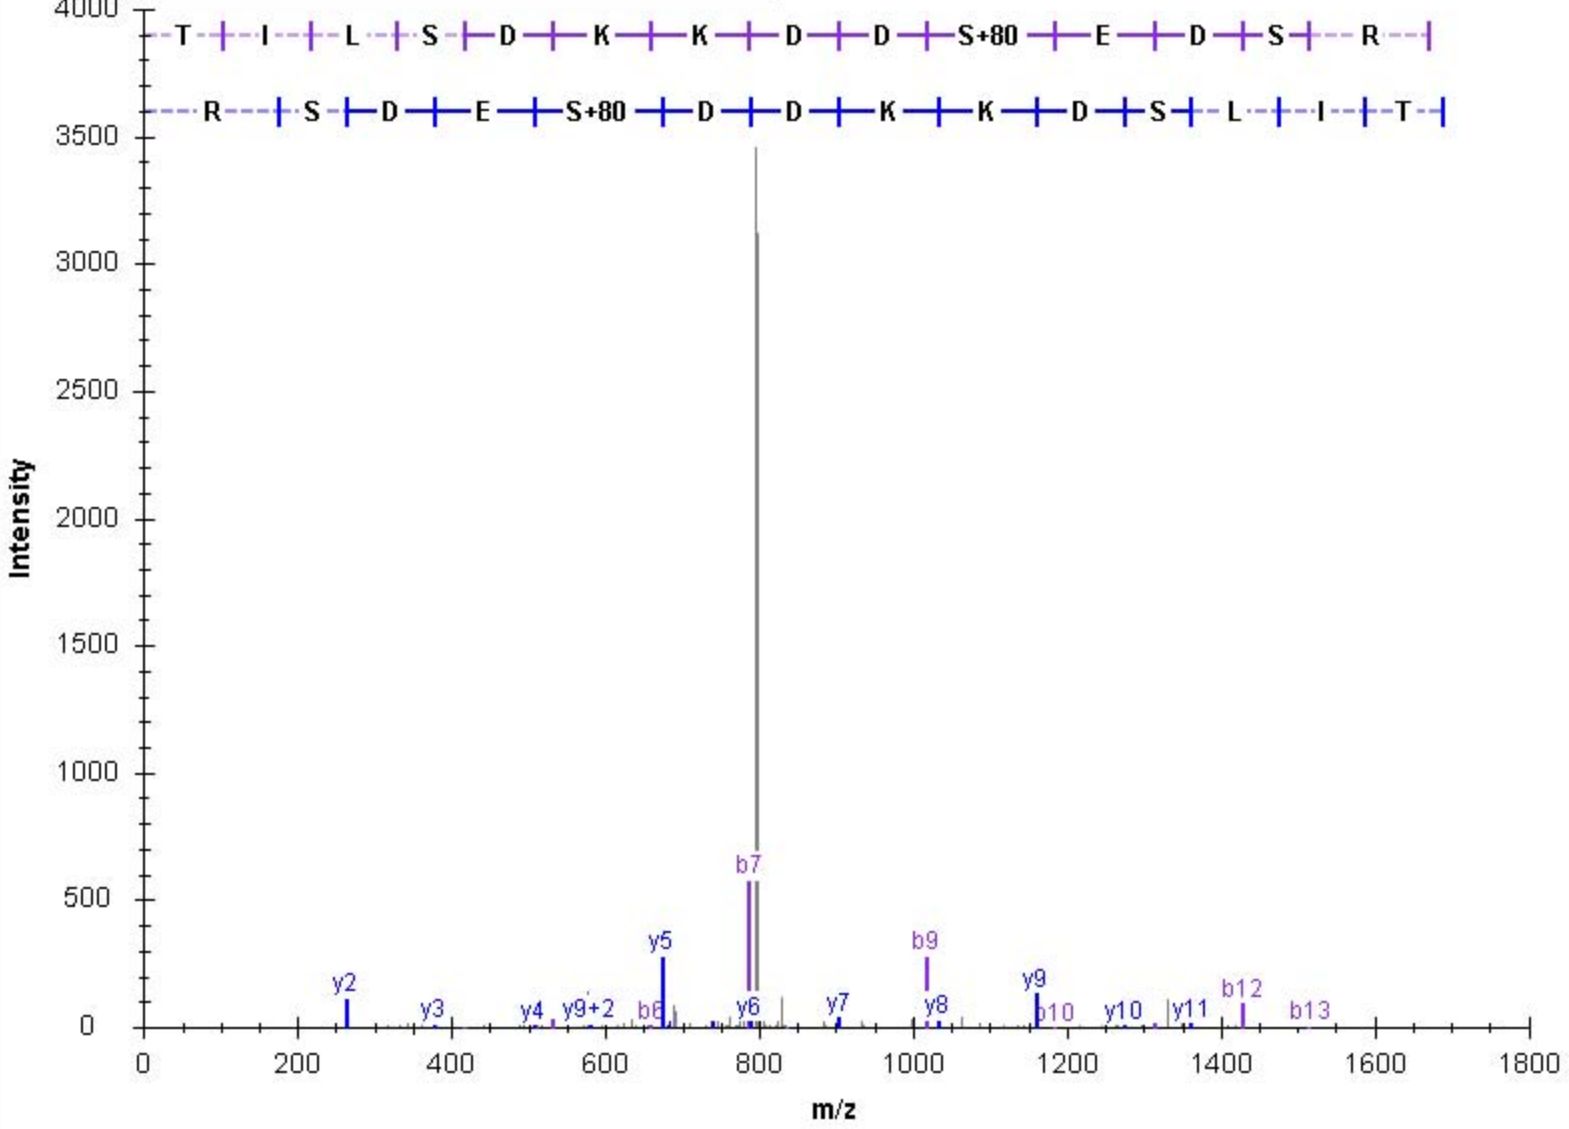

| b               | b(+2)          |    |   |    | y               | y(+2)          |
|-----------------|----------------|----|---|----|-----------------|----------------|
| 164.071         | 82.539         | 1  | Y | 15 | 1722.844        | 861.925        |
| <b>251.103</b>  | 126.055        | 2  | S | 14 | 1559.780        | <b>780.394</b> |
| <b>418.135</b>  | 209.571        | 3  | S | 13 | 1472.748        | 736.878        |
| 565.203         | 283.105        | 4  | F | 12 | <b>1305.716</b> | <b>653.362</b> |
| <b>652.235</b>  | 326.621        | 5  | S | 11 | <b>1158.648</b> | 579.827        |
| 739.267         | 370.137        | 6  | S | 10 | <b>1071.616</b> | <b>536.311</b> |
| 867.326         | 434.166        | 7  | Q | 9  | <b>984.584</b>  | <b>492.795</b> |
| 924.347         | 462.677        | 8  | G | 8  | <b>856.525</b>  | 428.766        |
| <b>1037.431</b> | <b>519.219</b> | 9  | L | 7  | <b>799.504</b>  | 400.255        |
| 1138.479        | 569.743        | 10 | T | 6  | <b>686.420</b>  | <b>343.713</b> |
| <b>1251.563</b> | 626.285        | 11 | L | 5  | <b>585.372</b>  | 293.190        |
| <b>1352.611</b> | 676.809        | 12 | T | 4  | <b>472.288</b>  | 236.648        |
| <b>1451.679</b> | 726.343        | 13 | V | 3  | <b>371.240</b>  | 186.124        |
| 1548.732        | <b>774.870</b> | 14 | P | 2  | <b>272.172</b>  | 136.589        |
| 1704.833        | <b>852.920</b> | 15 | R | 1  | 175.119         | 88.063         |

controllerType=0 controllerNumber=1 scan=11886

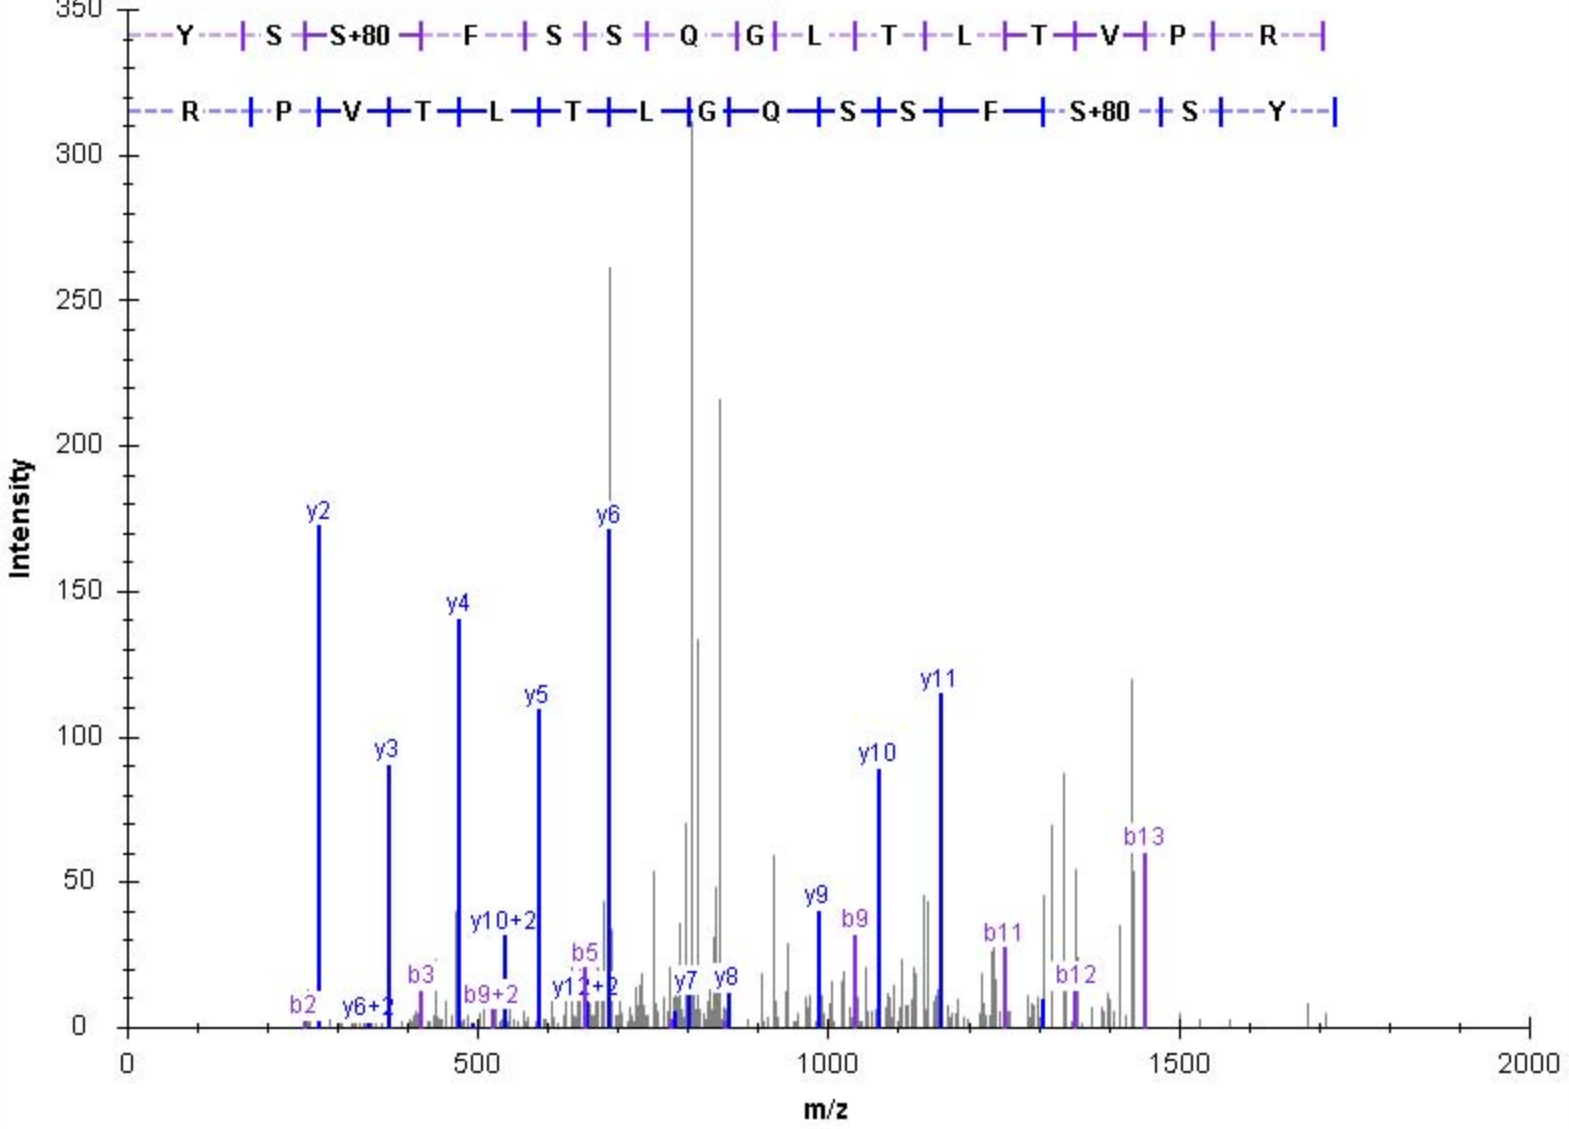

| b               | b(+2)          |    |   |    | y               | y(+2)           |
|-----------------|----------------|----|---|----|-----------------|-----------------|
| <b>114.091</b>  | 57.549         | 1  | I | 18 | 2115.968        | 1058.488        |
| 211.144         | 106.076        | 2  | P | 17 | 2002.884        | <b>1001.946</b> |
| 312.192         | 156.600        | 3  | T | 16 | <b>1905.831</b> | <b>953.419</b>  |
| <b>427.219</b>  | 214.113        | 4  | D | 15 | 1804.783        | <b>902.895</b>  |
| <b>541.262</b>  | 271.134        | 5  | N | 14 | <b>1689.756</b> | <b>845.382</b>  |
| <b>656.289</b>  | 328.648        | 6  | D | 13 | <b>1575.714</b> | <b>788.360</b>  |
| <b>771.316</b>  | 386.161        | 7  | D | 12 | <b>1460.687</b> | <b>730.847</b>  |
| 858.348         | 429.677        | 8  | S | 11 | <b>1345.660</b> | <b>673.333</b>  |
| <b>1014.449</b> | 507.728        | 9  | R | 10 | <b>1258.628</b> | 629.817         |
| <b>1129.476</b> | 565.241        | 10 | D | 9  | <b>1102.527</b> | 551.767         |
| <b>1296.508</b> | 648.757        | 11 | S | 8  | <b>987.500</b>  | 494.253         |
| <b>1395.576</b> | 698.292        | 12 | V | 7  | <b>820.468</b>  | <b>410.737</b>  |
| <b>1466.613</b> | 733.810        | 13 | A | 6  | <b>721.399</b>  | 361.203         |
| <b>1629.677</b> | 815.342        | 14 | Y | 5  | <b>650.362</b>  | 325.685         |
| <b>1700.714</b> | 850.860        | 15 | A | 4  | <b>487.299</b>  | 244.153         |
| 1813.798        | <b>907.402</b> | 16 | L | 3  | <b>416.262</b>  | 208.634         |
| <b>1941.856</b> | 971.432        | 17 | Q | 2  | <b>303.178</b>  | 152.092         |
| 2097.957        | 1049.482       | 18 | R | 1  | 175.119         | 88.063          |

controllerType=0 controllerNumber=1 scan=2973

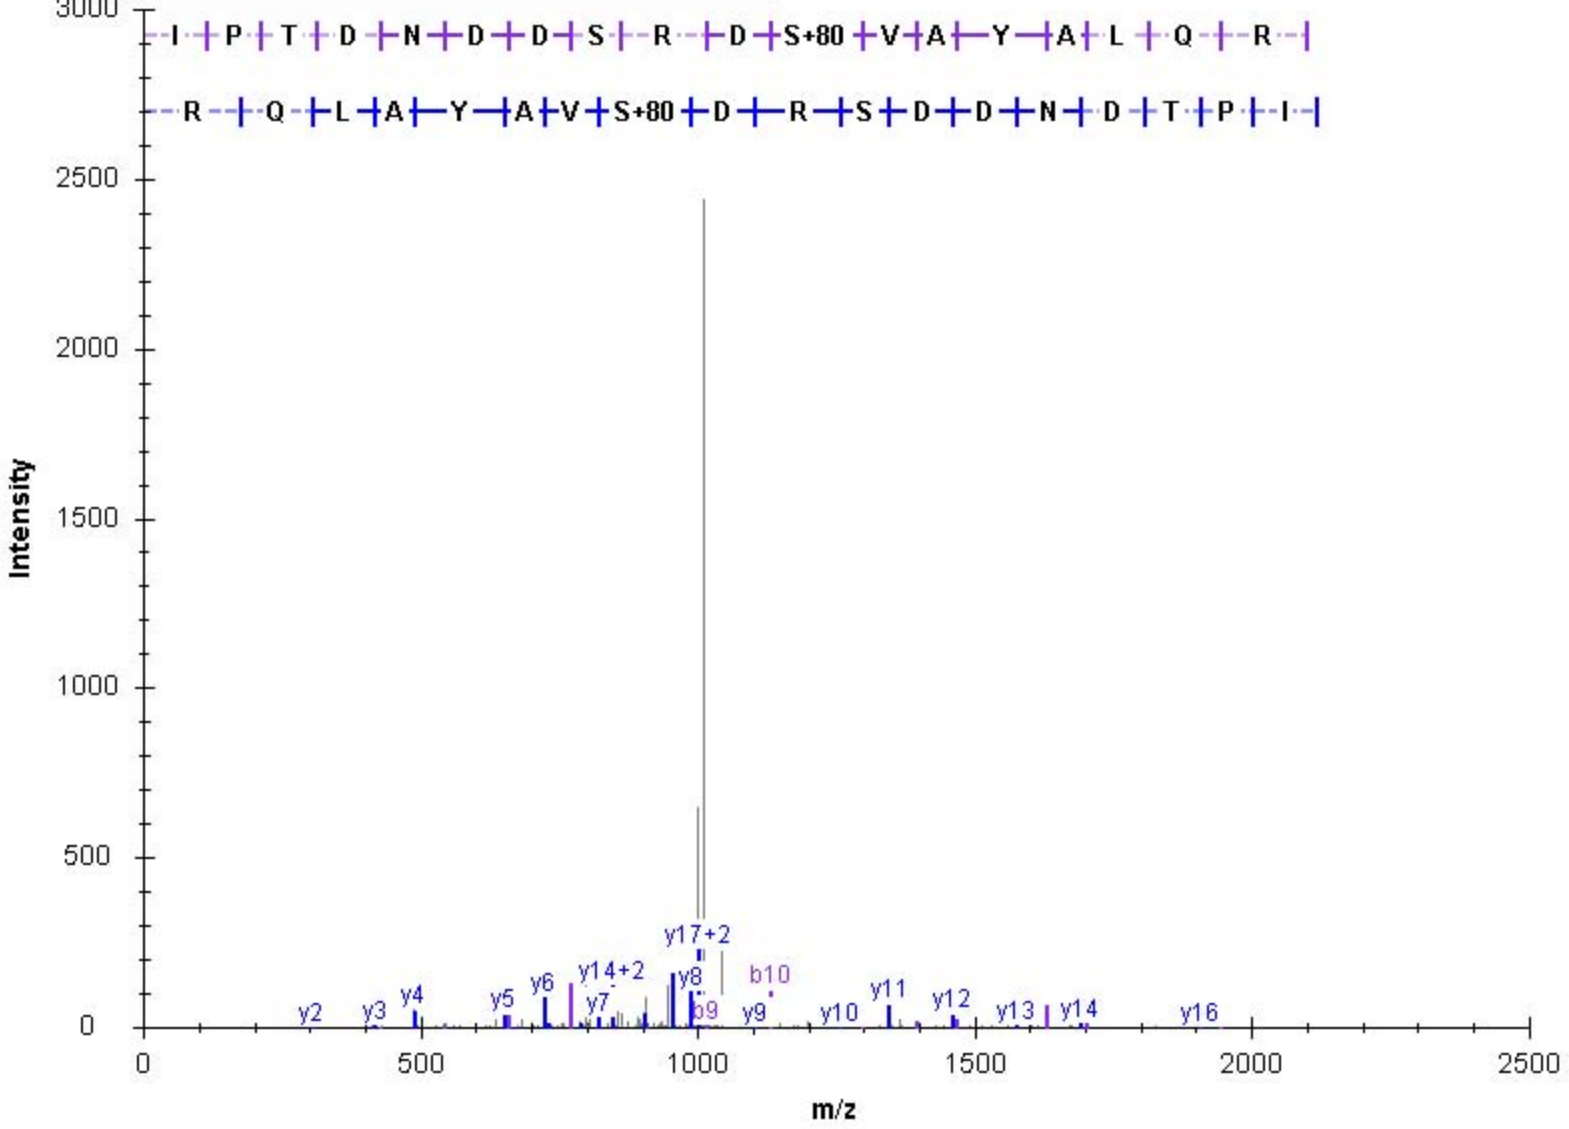

controllerType=0 controllerNumber=1 scan=13724

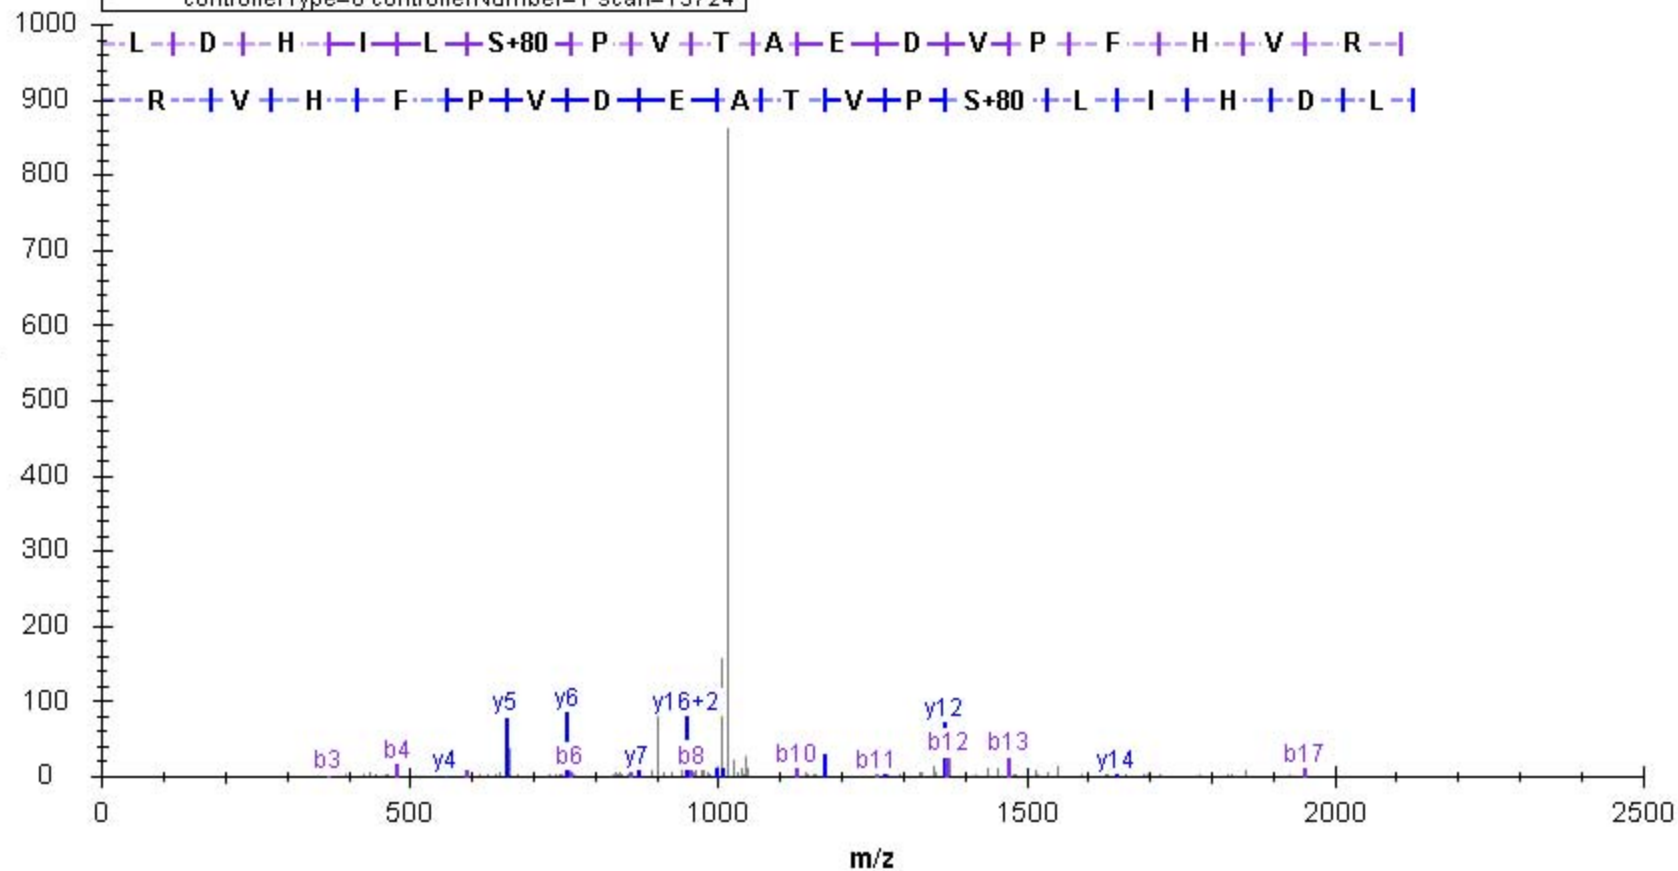

| b               | b(+2)           |    |   |    | y               | y(+2)           |
|-----------------|-----------------|----|---|----|-----------------|-----------------|
| <b>164.071</b>  | 82.539          | 1  | Y | 22 | 2555.102        | <b>1278.055</b> |
| <b>301.130</b>  | 151.068         | 2  | H | 21 | 2392.039        | <b>1196.523</b> |
| <b>358.151</b>  | 179.579         | 3  | G | 20 | 2254.980        | 1127.994        |
| <b>505.219</b>  | <b>253.113</b>  | 4  | F | 19 | 2197.958        | <b>1099.483</b> |
| <b>620.246</b>  | <b>310.627</b>  | 5  | D | 18 | 2050.890        | <b>1025.949</b> |
| <b>751.287</b>  | <b>376.147</b>  | 6  | M | 17 | 1935.863        | <b>968.435</b>  |
| <b>932.335</b>  | <b>466.671</b>  | 7  | T | 16 | 1804.823        | <b>902.915</b>  |
| <b>1047.361</b> | <b>524.184</b>  | 8  | D | 15 | <b>1623.775</b> | <b>812.391</b>  |
| <b>1194.430</b> | <b>597.719</b>  | 9  | F | 14 | <b>1508.748</b> | <b>754.878</b>  |
| 1281.462        | <b>641.235</b>  | 10 | S | 13 | <b>1361.679</b> | <b>681.343</b>  |
| <b>1352.499</b> | <b>676.753</b>  | 11 | A | 12 | <b>1274.647</b> | <b>637.827</b>  |
| 1439.531        | <b>720.269</b>  | 12 | S | 11 | <b>1203.610</b> | <b>602.309</b>  |
| <b>1554.558</b> | <b>777.783</b>  | 13 | D | 10 | <b>1116.578</b> | <b>558.793</b>  |
| <b>1669.585</b> | <b>835.296</b>  | 14 | D | 9  | <b>1001.551</b> | <b>501.279</b>  |
| <b>1784.612</b> | <b>892.810</b>  | 15 | D | 8  | <b>886.524</b>  | 443.766         |
| <b>1881.665</b> | <b>941.336</b>  | 16 | P | 7  | <b>771.497</b>  | 386.252         |
| 1980.733        | <b>990.870</b>  | 17 | V | 6  | <b>674.445</b>  | 337.726         |
| 2093.817        | <b>1047.412</b> | 18 | L | 5  | <b>575.376</b>  | <b>288.192</b>  |
| 2206.901        | <b>1103.954</b> | 19 | I | 4  | <b>462.292</b>  | 231.650         |
| 2307.949        | <b>1154.478</b> | 20 | T | 3  | <b>349.208</b>  | 175.108         |
| 2408.997        | 1205.002        | 21 | T | 2  | <b>248.160</b>  | 124.584         |
| 2537.091        | 1269.049        | 22 | K | 1  | 147.113         | 74.060          |



controllerType=0 controllerNumber=1 scan=4964

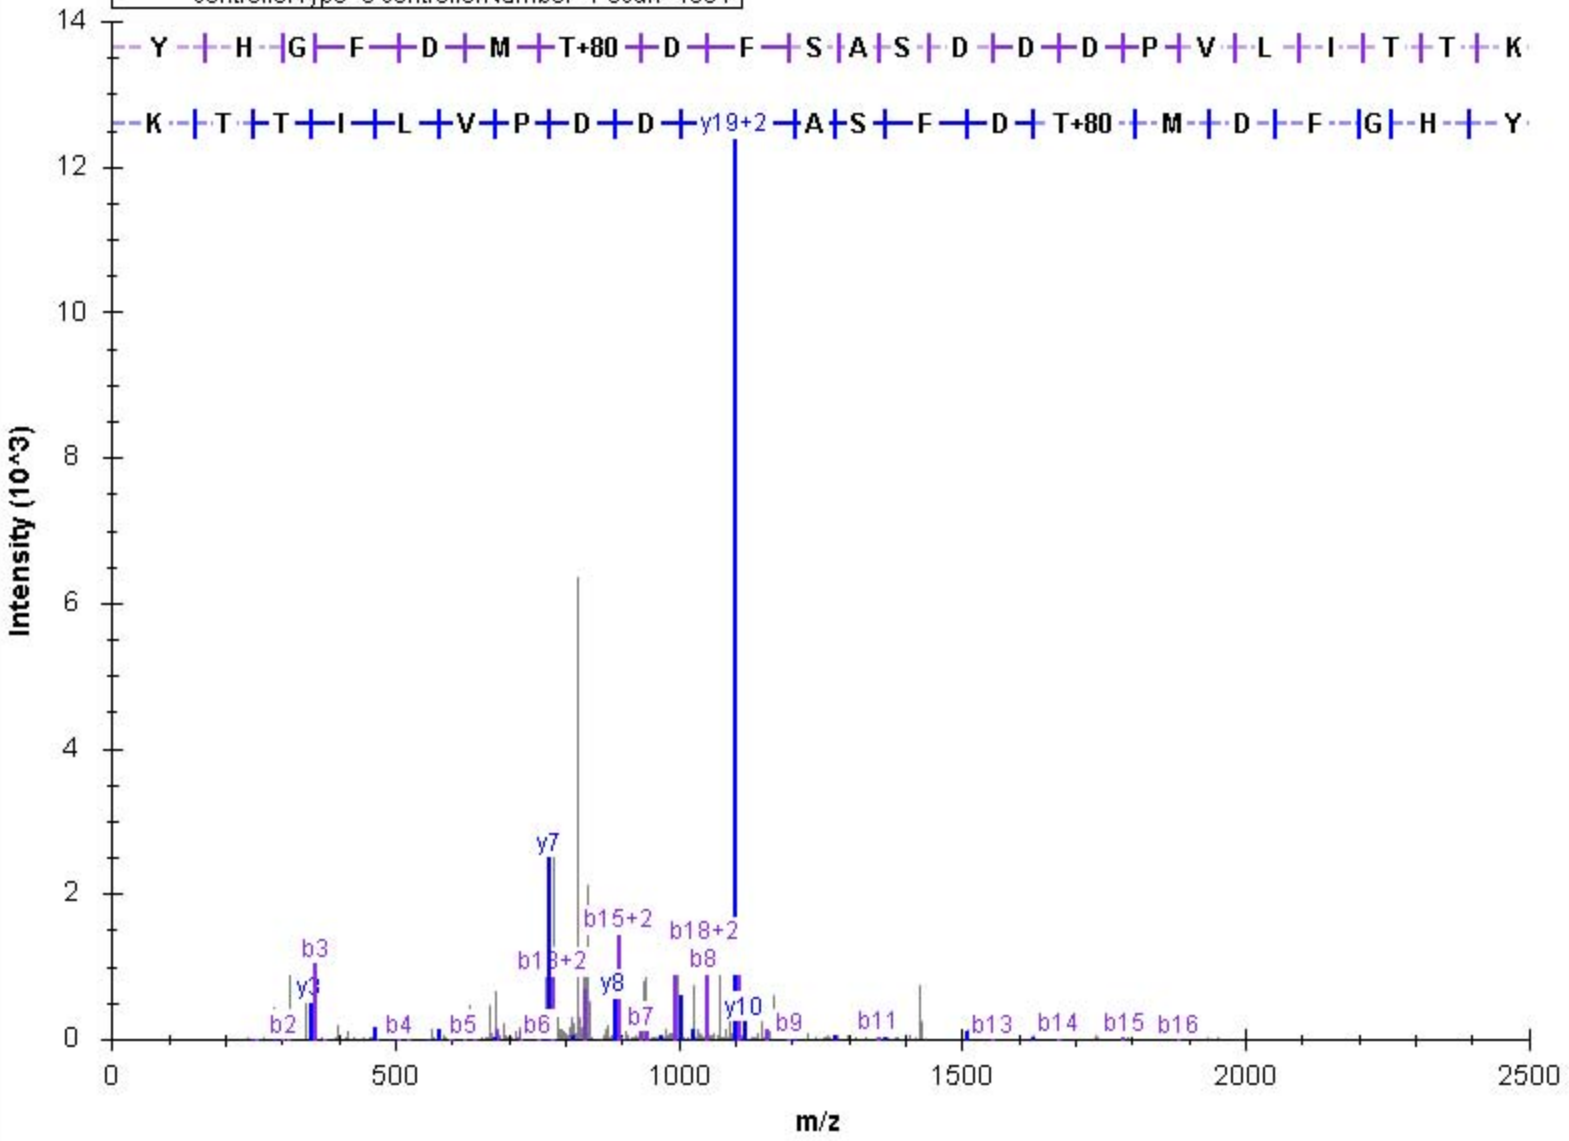

| b               | b(+2)           |    |   | y  | y(+2)           |                 |
|-----------------|-----------------|----|---|----|-----------------|-----------------|
| <b>88.039</b>   | 44.523          | 1  | S | 29 | 3224.476        | 1612.741        |
| 175.071         | 88.039          | 2  | S | 28 | 3137.444        | 1569.225        |
| 262.103         | 131.555         | 3  | S | 27 | 3050.412        | <b>1525.709</b> |
| 377.130         | 189.069         | 4  | D | 26 | 2963.380        | 1482.193        |
| 490.214         | 245.611         | 5  | L | 25 | 2848.353        | <b>1424.680</b> |
| <b>587.267</b>  | 294.137         | 6  | P | 24 | 2735.269        | <b>1368.138</b> |
| <b>715.326</b>  | 358.166         | 7  | Q | 23 | 2638.216        | 1319.612        |
| 862.394         | 431.701         | 8  | F | 22 | 2510.157        | <b>1255.582</b> |
| 977.421         | 489.214         | 9  | D | 21 | 2363.089        | <b>1182.048</b> |
| <b>1140.484</b> | 570.746         | 10 | Y | 20 | 2248.062        | <b>1124.535</b> |
| 1237.537        | <b>619.272</b>  | 11 | P | 19 | 2084.999        | <b>1043.003</b> |
| <b>1324.569</b> | 662.788         | 12 | S | 18 | 1987.946        | 994.477         |
| 1437.653        | 719.330         | 13 | L | 17 | 1900.914        | 950.960         |
| 1551.696        | 776.352         | 14 | N | 16 | 1787.830        | <b>894.418</b>  |
| 1718.728        | 859.868         | 15 | S | 15 | 1673.787        | 837.397         |
| 1805.760        | 903.384         | 16 | S | 14 | 1506.755        | 753.881         |
| 1902.813        | 951.910         | 17 | P | 13 | 1419.723        | 710.365         |
| 2003.861        | 1002.434        | 18 | T | 12 | 1322.670        | 661.839         |
| 2150.929        | 1075.968        | 19 | F | 11 | <b>1221.622</b> | 611.315         |
| 2264.972        | <b>1132.990</b> | 20 | N | 10 | 1074.554        | 537.781         |
| 2352.004        | 1176.506        | 21 | S | 9  | 960.511         | 480.759         |
| 2466.047        | 1233.527        | 22 | N | 8  | 873.479         | 437.243         |
| 2579.131        | <b>1290.069</b> | 23 | L | 7  | <b>759.436</b>  | 380.222         |
| 2676.184        | 1338.596        | 24 | P | 6  | <b>646.352</b>  | <b>323.680</b>  |
| 2789.268        | 1395.138        | 25 | I | 5  | 549.299         | 275.153         |
| 2876.300        | <b>1438.654</b> | 26 | S | 4  | <b>436.215</b>  | 218.611         |
| 2963.332        | 1482.170        | 27 | S | 3  | 349.183         | 175.095         |
| 3050.364        | <b>1525.686</b> | 28 | S | 2  | 262.151         | 131.579         |
| 3206.465        | 1603.736        | 29 | R | 1  | 175.119         | 88.063          |

controllerType=0 controllerNumber=1 scan=13745

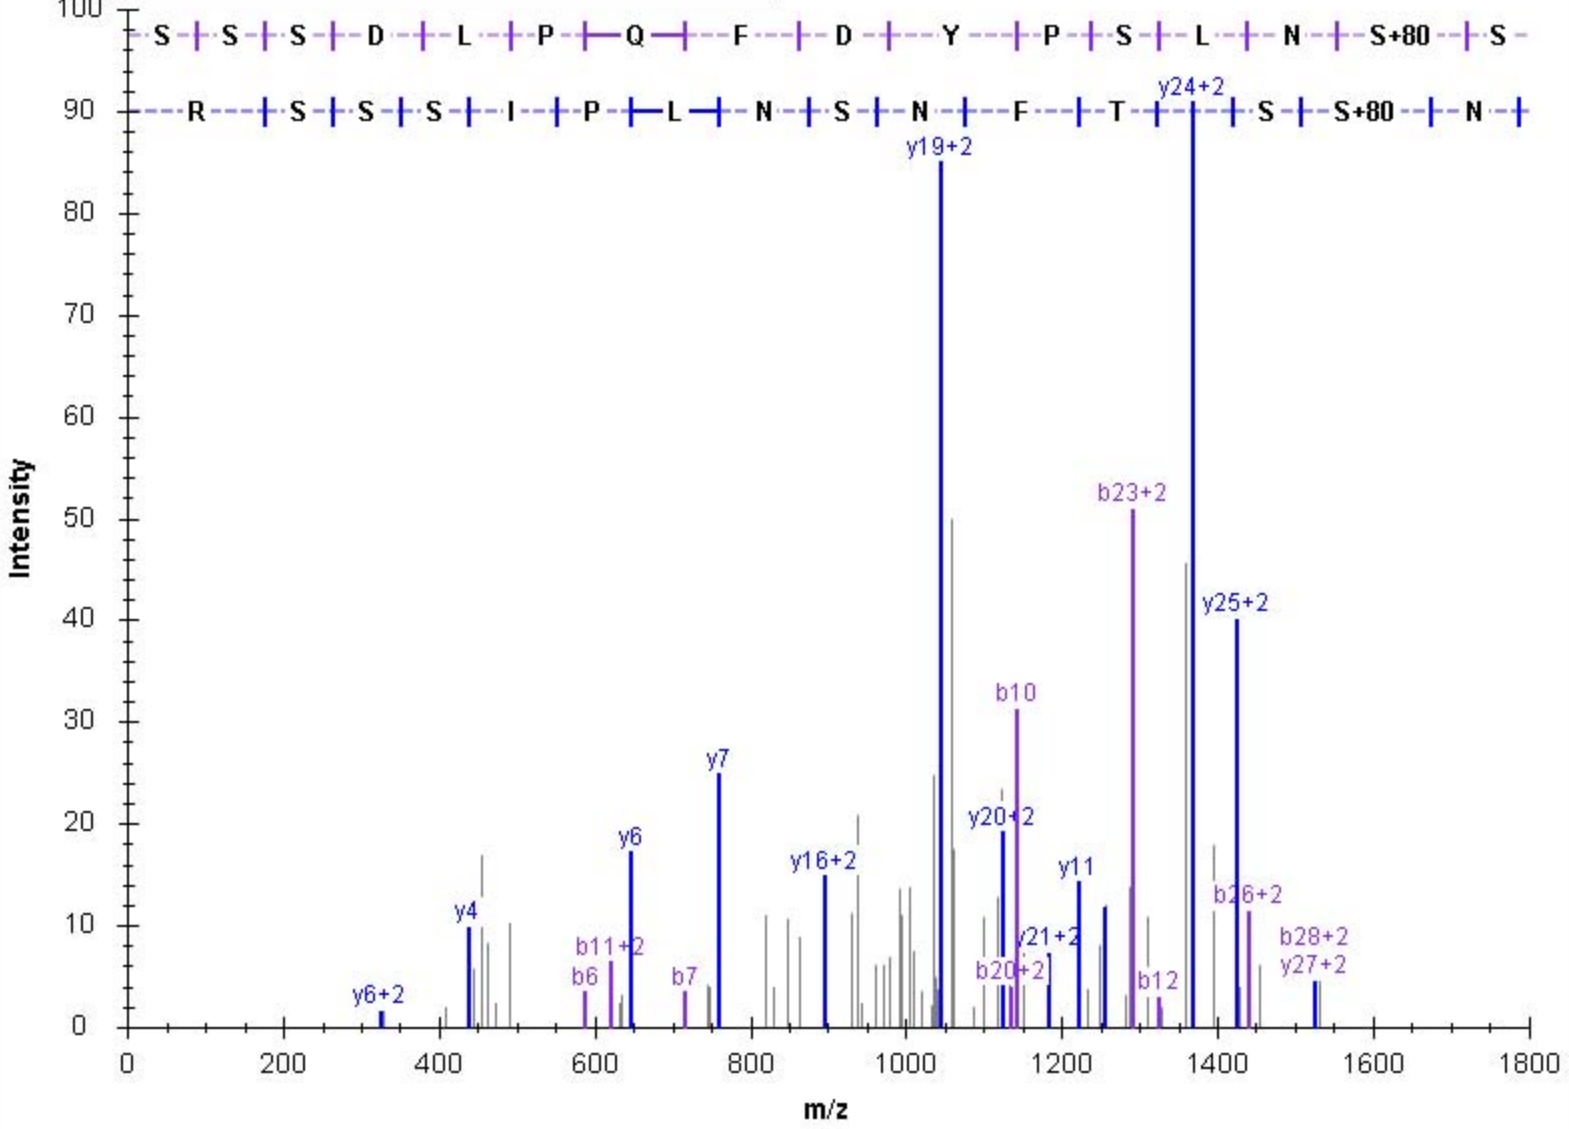

| b               | b(+2)          |    |   |    | y              | y(+2)          |
|-----------------|----------------|----|---|----|----------------|----------------|
| 148.076         | 74.541         | 1  | F | 10 | 1221.574       | 611.290        |
| <b>277.118</b>  | 139.063        | 2  | E | 9  | 1074.505       | <b>537.756</b> |
| <b>405.213</b>  | 203.110        | 3  | K | 8  | <b>945.463</b> | <b>473.235</b> |
| <b>506.261</b>  | 253.634        | 4  | T | 7  | <b>817.368</b> | 409.187        |
| <b>673.293</b>  | 337.150        | 5  | S | 6  | <b>716.320</b> | 358.664        |
| <b>786.377</b>  | <b>393.692</b> | 6  | L | 5  | <b>549.288</b> | <b>275.148</b> |
| <b>873.409</b>  | <b>437.208</b> | 7  | S | 4  | <b>436.204</b> | <b>218.606</b> |
| <b>988.436</b>  | <b>494.722</b> | 8  | D | 3  | <b>349.172</b> | <b>175.090</b> |
| <b>1075.468</b> | <b>538.238</b> | 9  | S | 2  | <b>234.145</b> | 117.576        |
| 1203.563        | <b>602.285</b> | 10 | K | 1  | 147.113        | 74.060         |

controllerType=0 controllerNumber=1 scan=7802

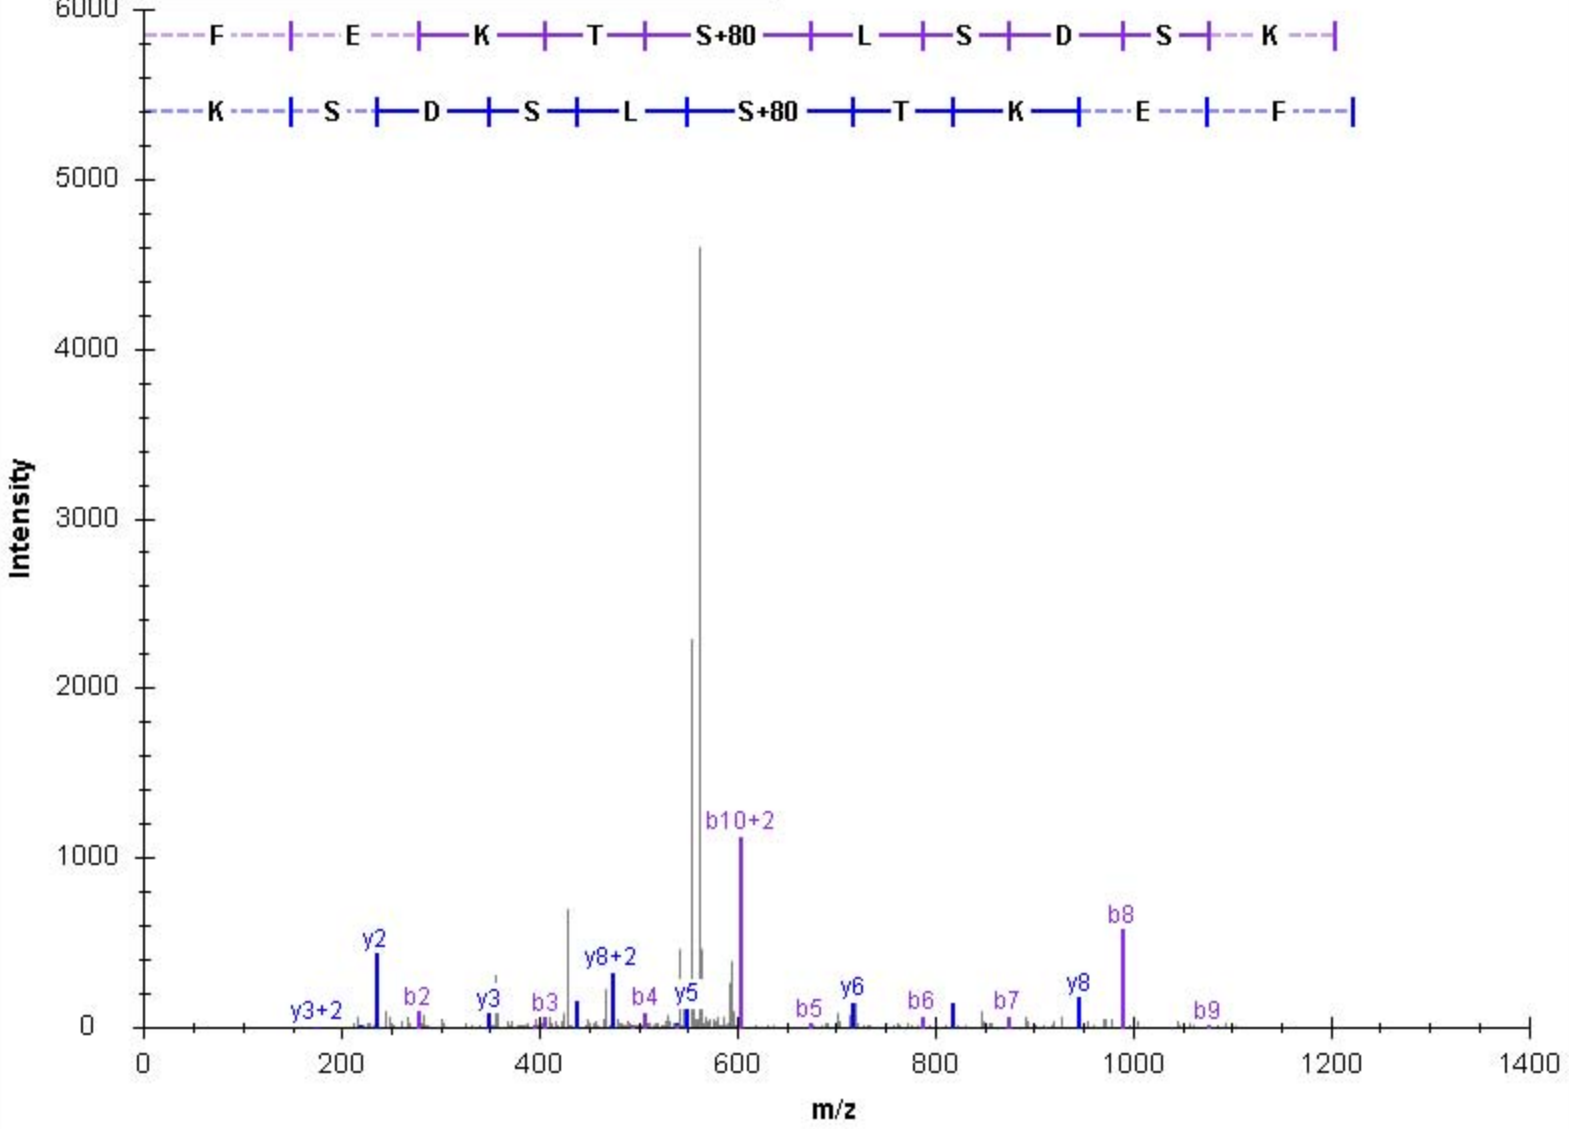

| b               | b(+2)           |    |   | y  | y(+2)           |                |
|-----------------|-----------------|----|---|----|-----------------|----------------|
| <b>114.091</b>  | 57.549          | 1  | L | 17 | 2051.043        | 1026.025       |
| 213.160         | 107.084         | 2  | V | 16 | 1937.959        | <b>969.483</b> |
| <b>380.192</b>  | 190.600         | 3  | S | 15 | <b>1838.891</b> | <b>919.949</b> |
| 477.245         | 239.126         | 4  | P | 14 | <b>1671.859</b> | <b>836.433</b> |
| <b>606.287</b>  | 303.647         | 5  | E | 13 | <b>1574.806</b> | 787.907        |
| 703.340         | 352.174         | 6  | P | 12 | <b>1445.763</b> | <b>723.385</b> |
| <b>816.424</b>  | 408.716         | 7  | L | 11 | 1348.711        | 674.859        |
| <b>931.451</b>  | 466.229         | 8  | D | 10 | <b>1235.627</b> | 618.317        |
| <b>1046.478</b> | 523.743         | 9  | D | 9  | <b>1120.600</b> | 560.803        |
| 1160.521        | 580.764         | 10 | N | 8  | <b>1005.573</b> | 503.290        |
| <b>1288.616</b> | 644.812         | 11 | K | 7  | <b>891.530</b>  | 446.269        |
| <b>1403.643</b> | <b>702.325</b>  | 12 | D | 6  | <b>763.435</b>  | 382.221        |
| <b>1516.727</b> | <b>758.867</b>  | 13 | I | 5  | <b>648.408</b>  | <b>324.708</b> |
| <b>1644.785</b> | 822.896         | 14 | Q | 4  | <b>535.324</b>  | 268.166        |
| 1791.854        | <b>896.431</b>  | 15 | F | 3  | <b>407.265</b>  | 204.136        |
| 1904.938        | <b>952.973</b>  | 16 | I | 2  | 260.197         | 130.602        |
| 2033.033        | <b>1017.020</b> | 17 | K | 1  | 147.113         | 74.060         |

controllerType=0 controllerNumber=1 scan=12002

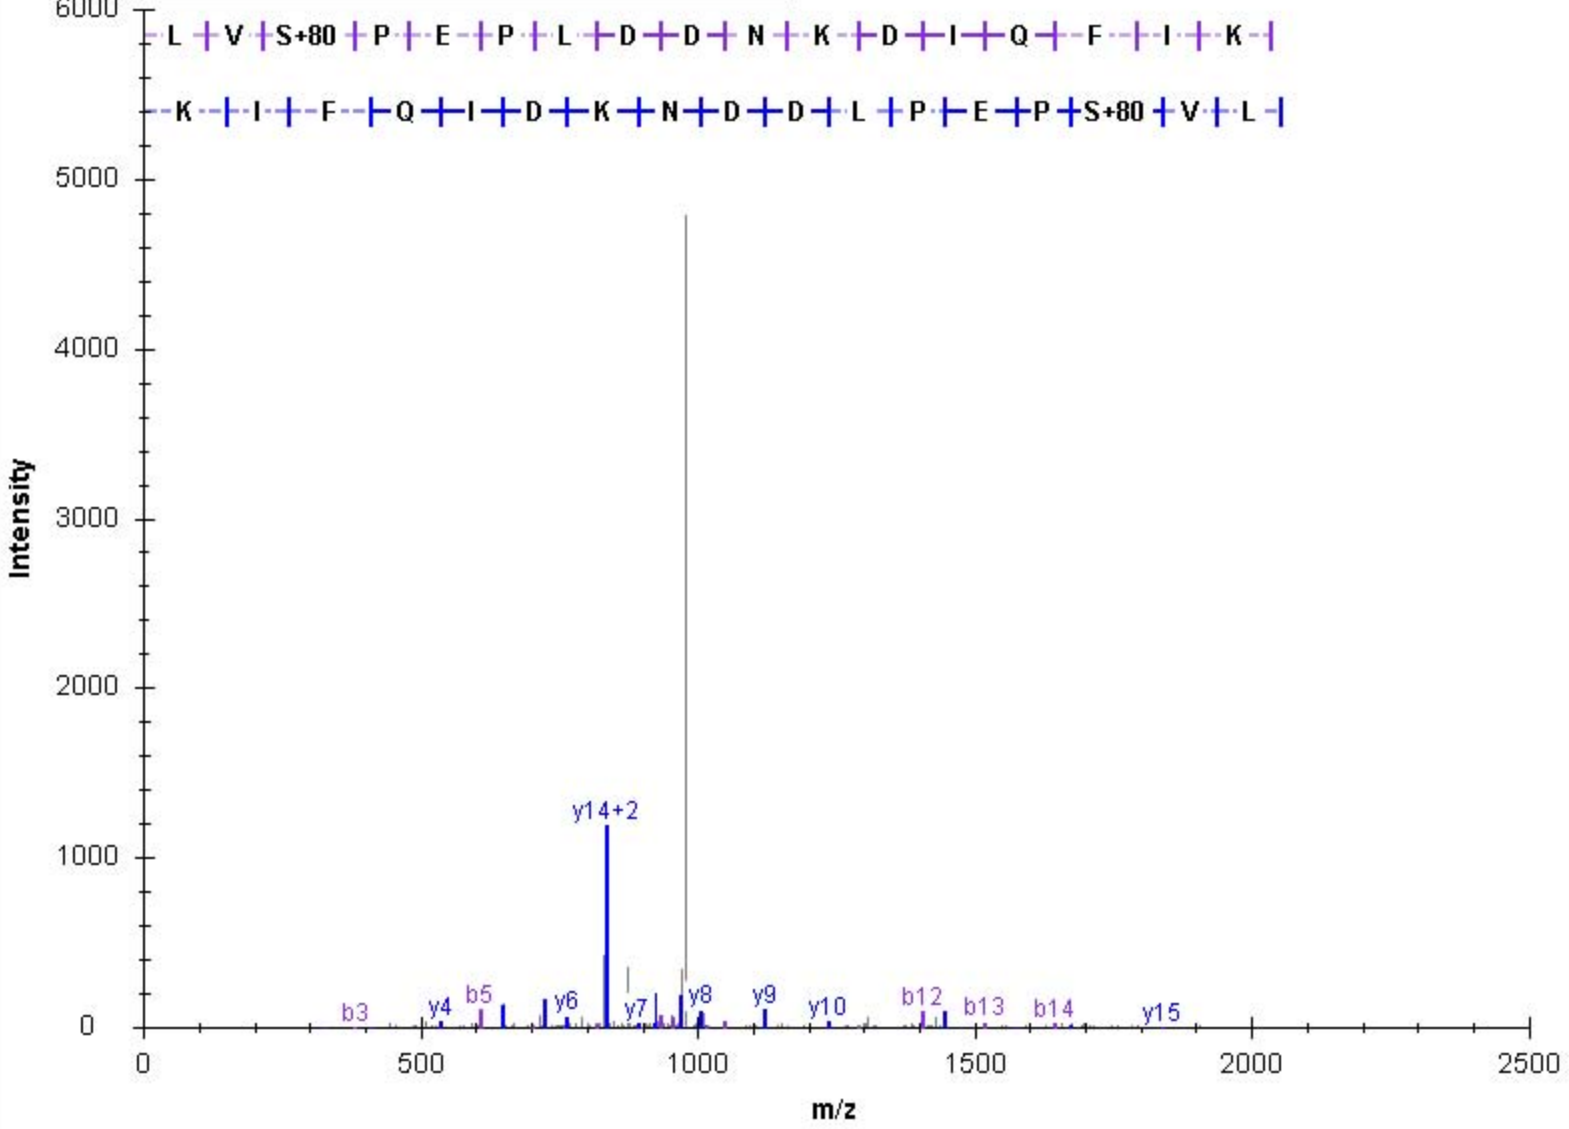

| b               | b(+2)          |    |   |    | y               | y(+2)          |
|-----------------|----------------|----|---|----|-----------------|----------------|
| <b>100.076</b>  | 50.541         | 1  | V | 13 | 1592.802        | 796.904        |
| <b>228.134</b>  | 114.571        | 2  | Q | 12 | 1493.733        | 747.370        |
| <b>342.177</b>  | 171.592        | 3  | N | 11 | <b>1365.675</b> | <b>683.341</b> |
| <b>471.220</b>  | 236.114        | 4  | E | 10 | <b>1251.632</b> | <b>626.320</b> |
| <b>570.288</b>  | 285.648        | 5  | V | 9  | <b>1122.589</b> | 561.798        |
| <b>671.336</b>  | <b>336.172</b> | 6  | T | 8  | <b>1023.521</b> | <b>512.264</b> |
| <b>784.420</b>  | <b>392.714</b> | 7  | L | 7  | <b>922.473</b>  | <b>461.740</b> |
| <b>951.452</b>  | 476.230        | 8  | S | 6  | <b>809.389</b>  | 405.198        |
| <b>1048.505</b> | <b>524.756</b> | 9  | P | 5  | <b>642.357</b>  | <b>321.682</b> |
| <b>1177.547</b> | <b>589.277</b> | 10 | E | 4  | <b>545.304</b>  | 273.156        |
| <b>1305.606</b> | <b>653.307</b> | 11 | Q | 3  | <b>416.262</b>  | 208.634        |
| <b>1418.690</b> | <b>709.849</b> | 12 | L | 2  | <b>288.203</b>  | 144.605        |
| 1574.791        | <b>787.899</b> | 13 | R | 1  | 175.119         | 88.063         |



controllerType=0 controllerNumber=1 scan=10700

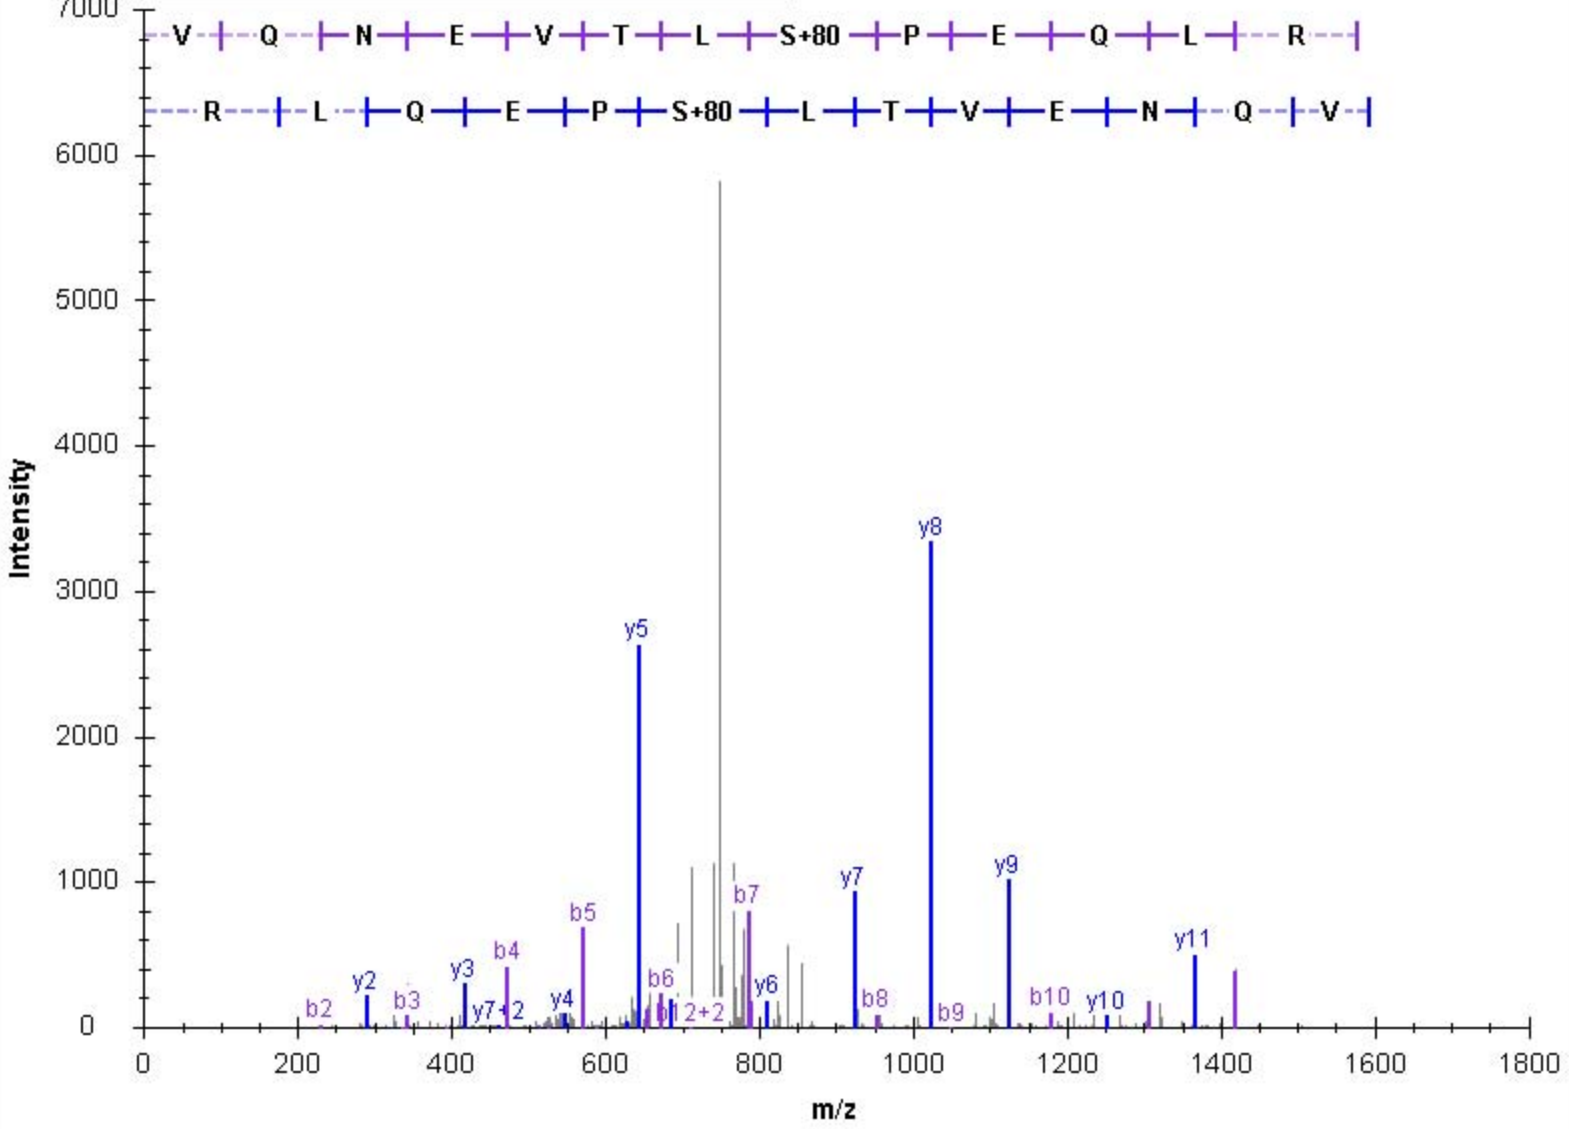

| b               | b(+2)          |    |   |    | y               | y(+2)          |
|-----------------|----------------|----|---|----|-----------------|----------------|
| <b>116.034</b>  | 58.521         | 1  | D | 16 | 1727.782        | 864.395        |
| 229.118         | 115.063        | 2  | I | 15 | 1612.755        | <b>806.881</b> |
| <b>316.150</b>  | 158.579        | 3  | S | 14 | <b>1499.671</b> | <b>750.339</b> |
| <b>403.182</b>  | 202.095        | 4  | S | 13 | 1412.639        | <b>706.823</b> |
| <b>531.277</b>  | 266.142        | 5  | K | 12 | <b>1325.607</b> | <b>663.307</b> |
| <b>698.309</b>  | 349.658        | 6  | S | 11 | <b>1197.512</b> | 599.260        |
| 795.362         | 398.185        | 7  | P | 10 | <b>1030.480</b> | <b>515.744</b> |
| <b>882.394</b>  | 441.701        | 8  | S | 9  | <b>933.427</b>  | 467.217        |
| <b>939.416</b>  | 470.211        | 9  | G | 8  | <b>846.395</b>  | 423.701        |
| <b>1053.459</b> | 527.233        | 10 | N | 7  | <b>789.374</b>  | 395.190        |
| <b>1168.485</b> | 584.746        | 11 | D | 6  | <b>675.331</b>  | 338.169        |
| <b>1239.523</b> | <b>620.265</b> | 12 | A | 5  | <b>560.304</b>  | 280.656        |
| 1352.607        | <b>676.807</b> | 13 | L | 4  | <b>489.267</b>  | 245.137        |
| <b>1466.650</b> | <b>733.828</b> | 14 | N | 3  | <b>376.183</b>  | 188.595        |
| <b>1581.677</b> | <b>791.342</b> | 15 | D | 2  | <b>262.140</b>  | 131.574        |
| 1709.771        | 855.389        | 16 | K | 1  | 147.113         | 74.060         |

controllerType=0 controllerNumber=1 scan=6781

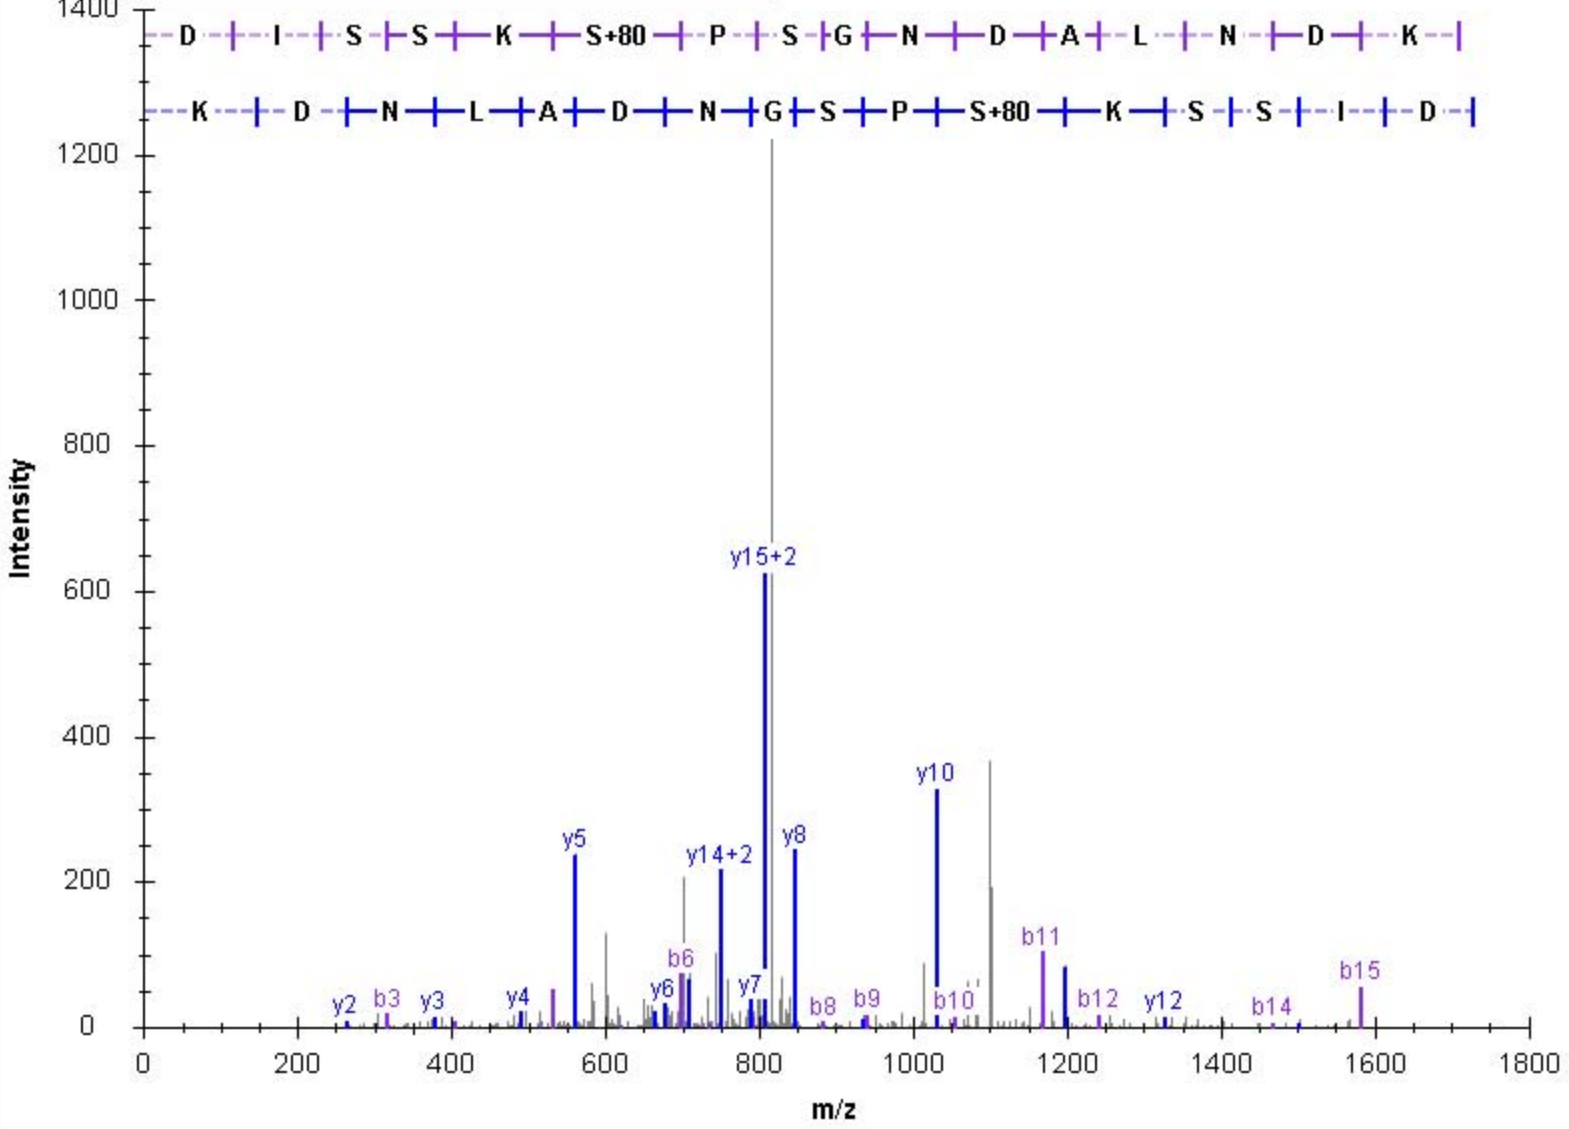

| b        | b(+2)   |    |   |    | y        | y(+2)   |
|----------|---------|----|---|----|----------|---------|
| 116.034  | 58.521  | 1  | D | 17 | 1855.877 | 928.442 |
| 229.118  | 115.063 | 2  | I | 16 | 1740.850 | 870.929 |
| 316.150  | 158.579 | 3  | S | 15 | 1627.766 | 814.387 |
| 403.182  | 202.095 | 4  | S | 14 | 1540.734 | 770.871 |
| 531.277  | 266.142 | 5  | K | 13 | 1453.702 | 727.355 |
| 698.309  | 349.658 | 6  | S | 12 | 1325.607 | 663.307 |
| 795.362  | 398.185 | 7  | P | 11 | 1158.575 | 579.791 |
| 882.394  | 441.701 | 8  | S | 10 | 1061.522 | 531.265 |
| 939.416  | 470.211 | 9  | G | 9  | 974.490  | 487.749 |
| 1053.459 | 527.233 | 10 | N | 8  | 917.469  | 459.238 |
| 1168.485 | 584.746 | 11 | D | 7  | 803.426  | 402.217 |
| 1239.523 | 620.265 | 12 | A | 6  | 688.399  | 344.703 |
| 1352.607 | 676.807 | 13 | L | 5  | 617.362  | 309.184 |
| 1466.650 | 733.828 | 14 | N | 4  | 504.278  | 252.642 |
| 1581.677 | 791.342 | 15 | D | 3  | 390.235  | 195.621 |
| 1709.771 | 855.389 | 16 | K | 2  | 275.208  | 138.108 |
| 1837.866 | 919.437 | 17 | K | 1  | 147.113  | 74.060  |

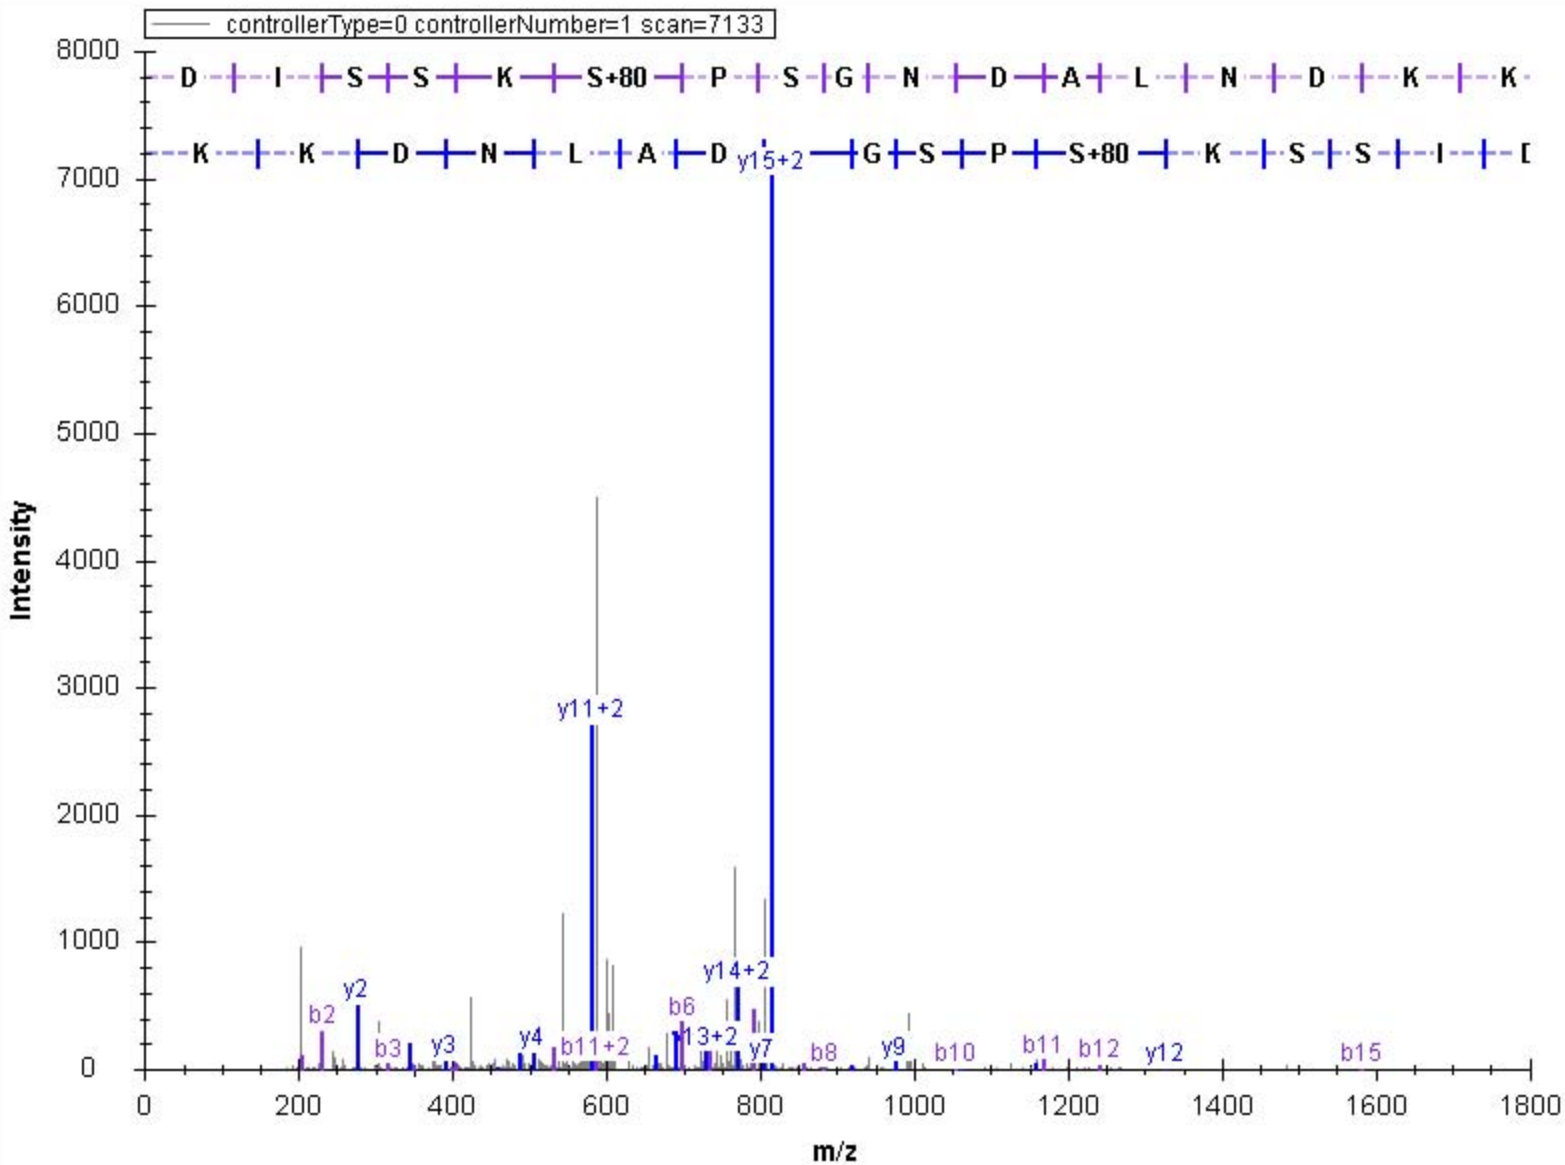

| b        | b(+2)    |    |   |    | y        | y(+2)    |
|----------|----------|----|---|----|----------|----------|
| 116.034  | 58.521   | 1  | D | 20 | 2142.041 | 1071.524 |
| 229.118  | 115.063  | 2  | I | 19 | 2027.014 | 1014.011 |
| 316.150  | 158.579  | 3  | S | 18 | 1913.930 | 957.469  |
| 403.182  | 202.095  | 4  | S | 17 | 1826.898 | 913.953  |
| 531.277  | 266.142  | 5  | K | 16 | 1739.866 | 870.437  |
| 698.309  | 349.658  | 6  | S | 15 | 1611.771 | 806.389  |
| 795.362  | 398.185  | 7  | P | 14 | 1444.739 | 722.873  |
| 882.394  | 441.701  | 8  | S | 13 | 1347.686 | 674.347  |
| 939.416  | 470.211  | 9  | G | 12 | 1260.654 | 630.831  |
| 1053.459 | 527.233  | 10 | N | 11 | 1203.633 | 602.320  |
| 1168.485 | 584.746  | 11 | D | 10 | 1089.590 | 545.299  |
| 1239.523 | 620.265  | 12 | A | 9  | 974.563  | 487.785  |
| 1352.607 | 676.807  | 13 | L | 8  | 903.526  | 452.267  |
| 1466.650 | 733.828  | 14 | N | 7  | 790.442  | 395.725  |
| 1581.677 | 791.342  | 15 | D | 6  | 676.399  | 338.703  |
| 1709.771 | 855.389  | 16 | K | 5  | 561.372  | 281.190  |
| 1837.866 | 919.437  | 17 | K | 4  | 433.277  | 217.142  |
| 1894.888 | 947.948  | 18 | G | 3  | 305.182  | 153.095  |
| 1995.936 | 998.471  | 19 | T | 2  | 248.160  | 124.584  |
| 2124.031 | 1062.519 | 20 | K | 1  | 147.113  | 74.060   |

controllerType=0 controllerNumber=1 scan=7071

Intensity (10<sup>3</sup>)

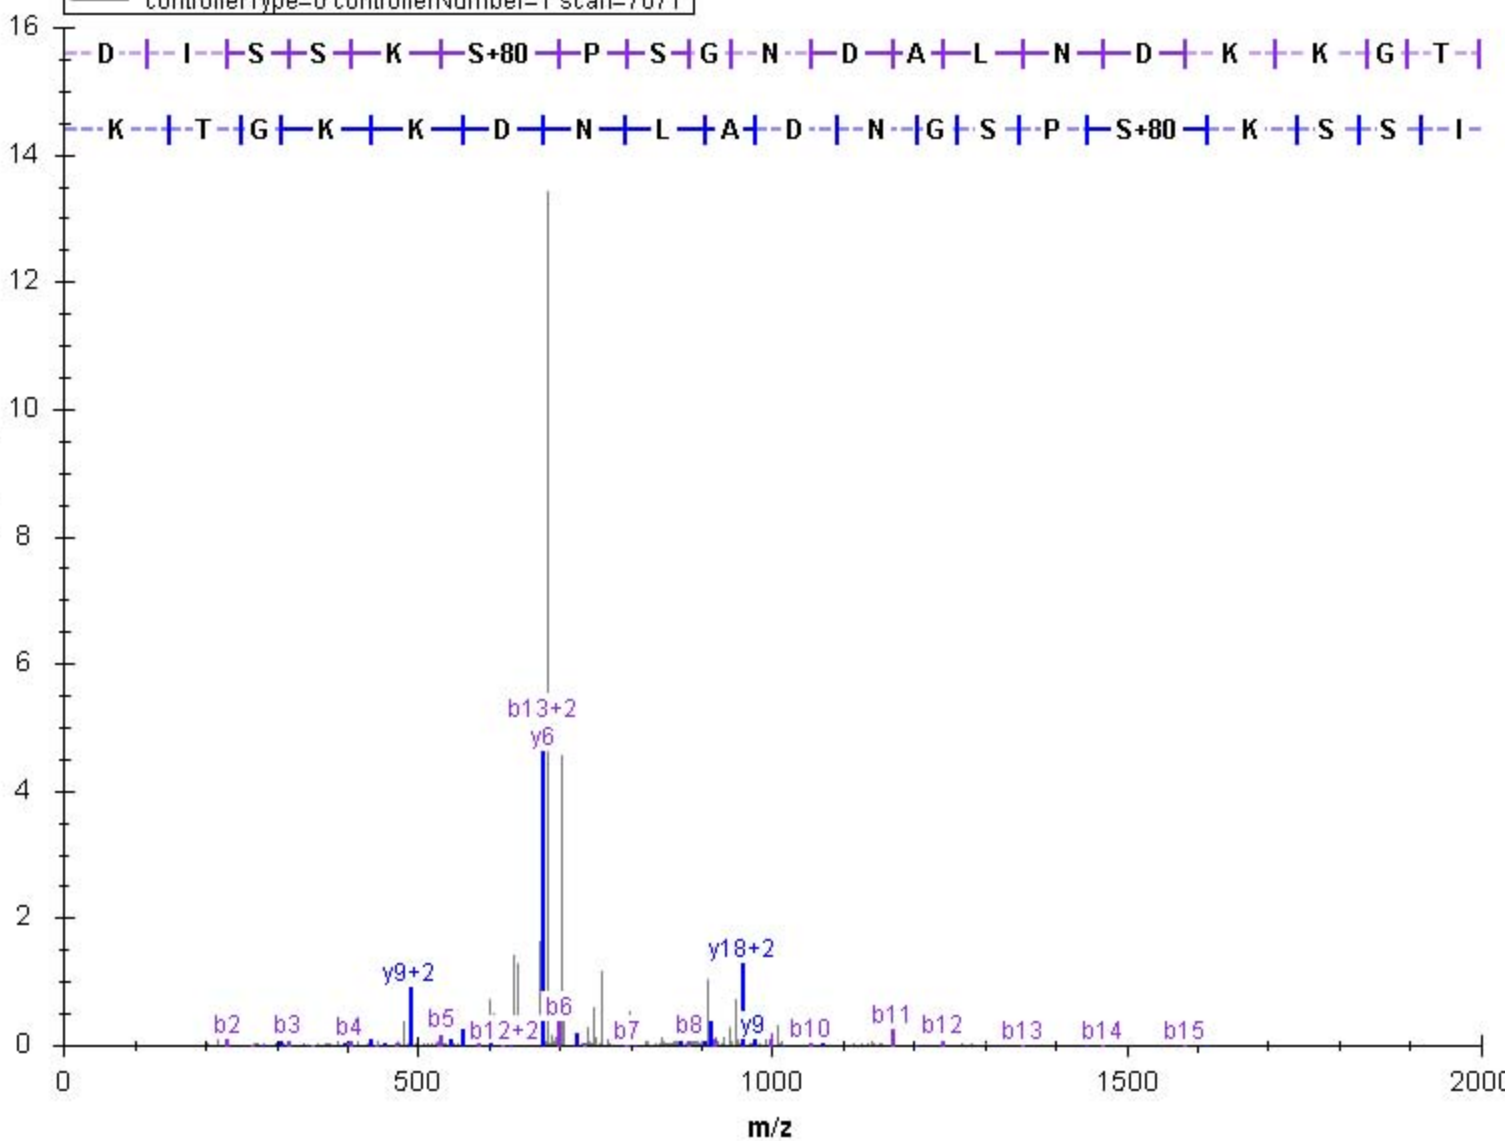

| b               | b(+2)          |    |   |    | y               | y(+2)          |
|-----------------|----------------|----|---|----|-----------------|----------------|
| <b>102.055</b>  | 51.531         | 1  | T | 16 | 1977.804        | 989.406        |
| 203.103         | 102.055        | 2  | T | 15 | 1876.756        | <b>938.882</b> |
| <b>332.145</b>  | 166.576        | 3  | E | 14 | <b>1775.709</b> | <b>888.358</b> |
| <b>461.188</b>  | 231.098        | 4  | E | 13 | <b>1646.666</b> | <b>823.837</b> |
| <b>589.283</b>  | <b>295.145</b> | 5  | K | 12 | <b>1517.624</b> | <b>759.315</b> |
| <b>718.325</b>  | <b>359.666</b> | 6  | E | 11 | <b>1389.529</b> | 695.268        |
| <b>789.362</b>  | <b>395.185</b> | 7  | A | 10 | <b>1260.486</b> | <b>630.747</b> |
| <b>970.410</b>  | <b>485.709</b> | 8  | T | 9  | <b>1189.449</b> | <b>595.228</b> |
| <b>1067.463</b> | 534.235        | 9  | P | 8  | <b>1008.401</b> | <b>504.704</b> |
| <b>1198.503</b> | <b>599.755</b> | 10 | M | 7  | <b>911.348</b>  | 456.178        |
| <b>1327.546</b> | <b>664.277</b> | 11 | E | 6  | <b>780.308</b>  | 390.658        |
| <b>1458.586</b> | <b>729.797</b> | 12 | M | 5  | <b>651.265</b>  | <b>326.136</b> |
| <b>1573.613</b> | <b>787.310</b> | 13 | D | 4  | <b>520.225</b>  | 260.616        |
| <b>1702.656</b> | 851.832        | 14 | E | 3  | <b>405.198</b>  | 203.103        |
| <b>1831.699</b> | <b>916.353</b> | 15 | E | 2  | 276.155         | 138.581        |
| 1959.794        | 980.400        | 16 | K | 1  | 147.113         | 74.060         |



controllerType=0 controllerNumber=1 scan=8404

Intensity (10<sup>3</sup>)

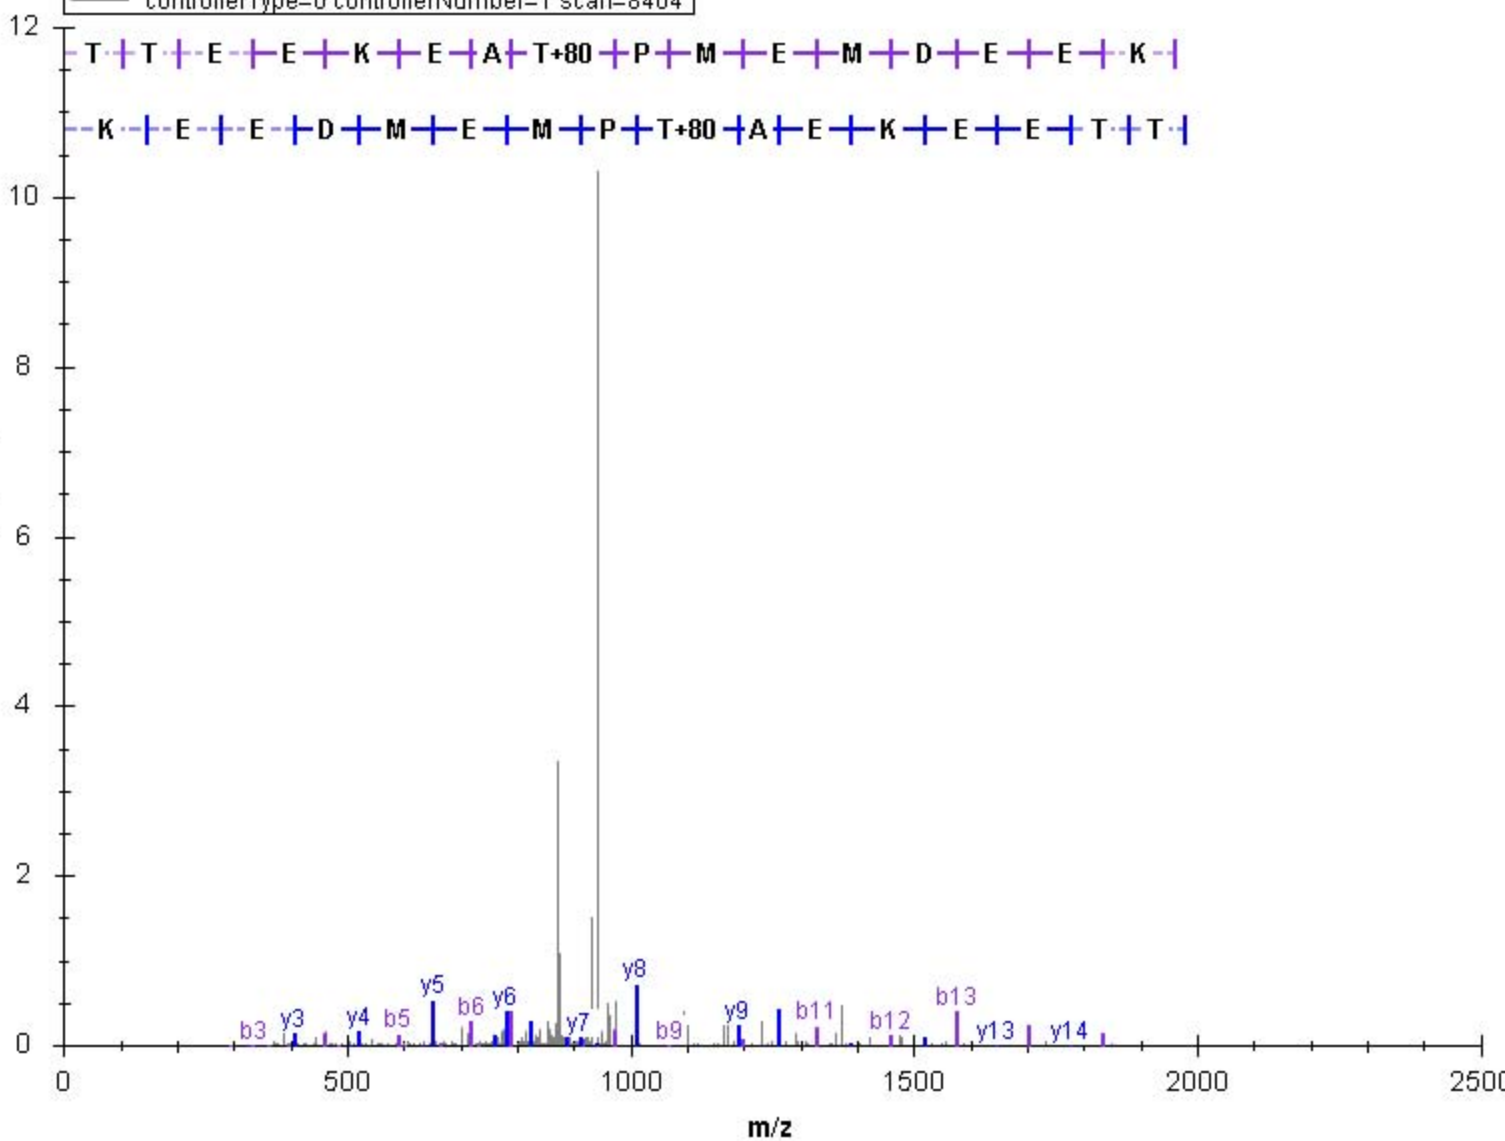

| b               | b(+2)           |    |   | y  | y(+2)           |                 |
|-----------------|-----------------|----|---|----|-----------------|-----------------|
| <b>116.034</b>  | 58.521          | 1  | D | 30 | 3335.292        | 1668.150        |
| 187.071         | 94.039          | 2  | A | 29 | 3220.265        | 1610.636        |
| 286.140         | 143.574         | 3  | V | 28 | 3149.228        | 1575.118        |
| 383.193         | 192.100         | 4  | P | 27 | 3050.160        | <b>1525.583</b> |
| 454.230         | 227.618         | 5  | A | 26 | 2953.107        | <b>1477.057</b> |
| <b>541.262</b>  | 271.134         | 6  | S | 25 | 2882.070        | <b>1441.538</b> |
| 612.299         | 306.653         | 7  | A | 24 | 2795.038        | 1398.022        |
| <b>727.326</b>  | <b>364.166</b>  | 8  | D | 23 | 2724.001        | 1362.504        |
| <b>828.373</b>  | 414.690         | 9  | T | 22 | 2608.974        | 1304.990        |
| <b>957.416</b>  | <b>479.212</b>  | 10 | E | 21 | 2507.926        | 1254.467        |
| 1054.469        | 527.738         | 11 | P | 20 | 2378.883        | <b>1189.945</b> |
| 1111.490        | 556.249         | 12 | G | 19 | 2281.831        | 1141.419        |
| <b>1240.533</b> | 620.770         | 13 | E | 18 | 2224.809        | <b>1112.908</b> |
| <b>1368.591</b> | 684.799         | 14 | Q | 17 | 2095.767        | <b>1048.387</b> |
| 1497.634        | <b>749.321</b>  | 15 | E | 16 | 1967.708        | 984.358         |
| <b>1568.671</b> | <b>784.839</b>  | 16 | A | 15 | <b>1838.665</b> | 919.836         |
| 1735.703        | <b>868.355</b>  | 17 | S | 14 | <b>1767.628</b> | 884.318         |
| 1832.756        | 916.882         | 18 | P | 13 | <b>1600.596</b> | 800.802         |
| 1929.809        | 965.408         | 19 | P | 12 | <b>1503.543</b> | 752.275         |
| 2058.851        | <b>1029.929</b> | 20 | E | 11 | 1406.491        | 703.749         |
| 2173.878        | 1087.443        | 21 | D | 10 | <b>1277.448</b> | 639.228         |
| 2320.947        | 1160.977        | 22 | F | 9  | <b>1162.421</b> | 581.714         |
| 2449.989        | <b>1225.498</b> | 23 | E | 8  | <b>1015.353</b> | <b>508.180</b>  |
| 2613.053        | <b>1307.030</b> | 24 | Y | 7  | <b>886.310</b>  | 443.659         |
| 2710.105        | <b>1355.556</b> | 25 | P | 6  | <b>723.247</b>  | 362.127         |
| 2857.174        | 1429.090        | 26 | F | 5  | 626.194         | 313.601         |
| 2972.201        | 1486.604        | 27 | D | 4  | <b>479.126</b>  | 240.066         |
| 3087.228        | 1544.117        | 28 | D | 3  | <b>364.099</b>  | 182.553         |
| 3202.255        | <b>1601.631</b> | 29 | D | 2  | 249.072         | 125.040         |
| 3317.281        | 1659.144        | 30 | D | 1  | 134.045         | 67.526          |

controllerType=0 controllerNumber=1 scan=12078

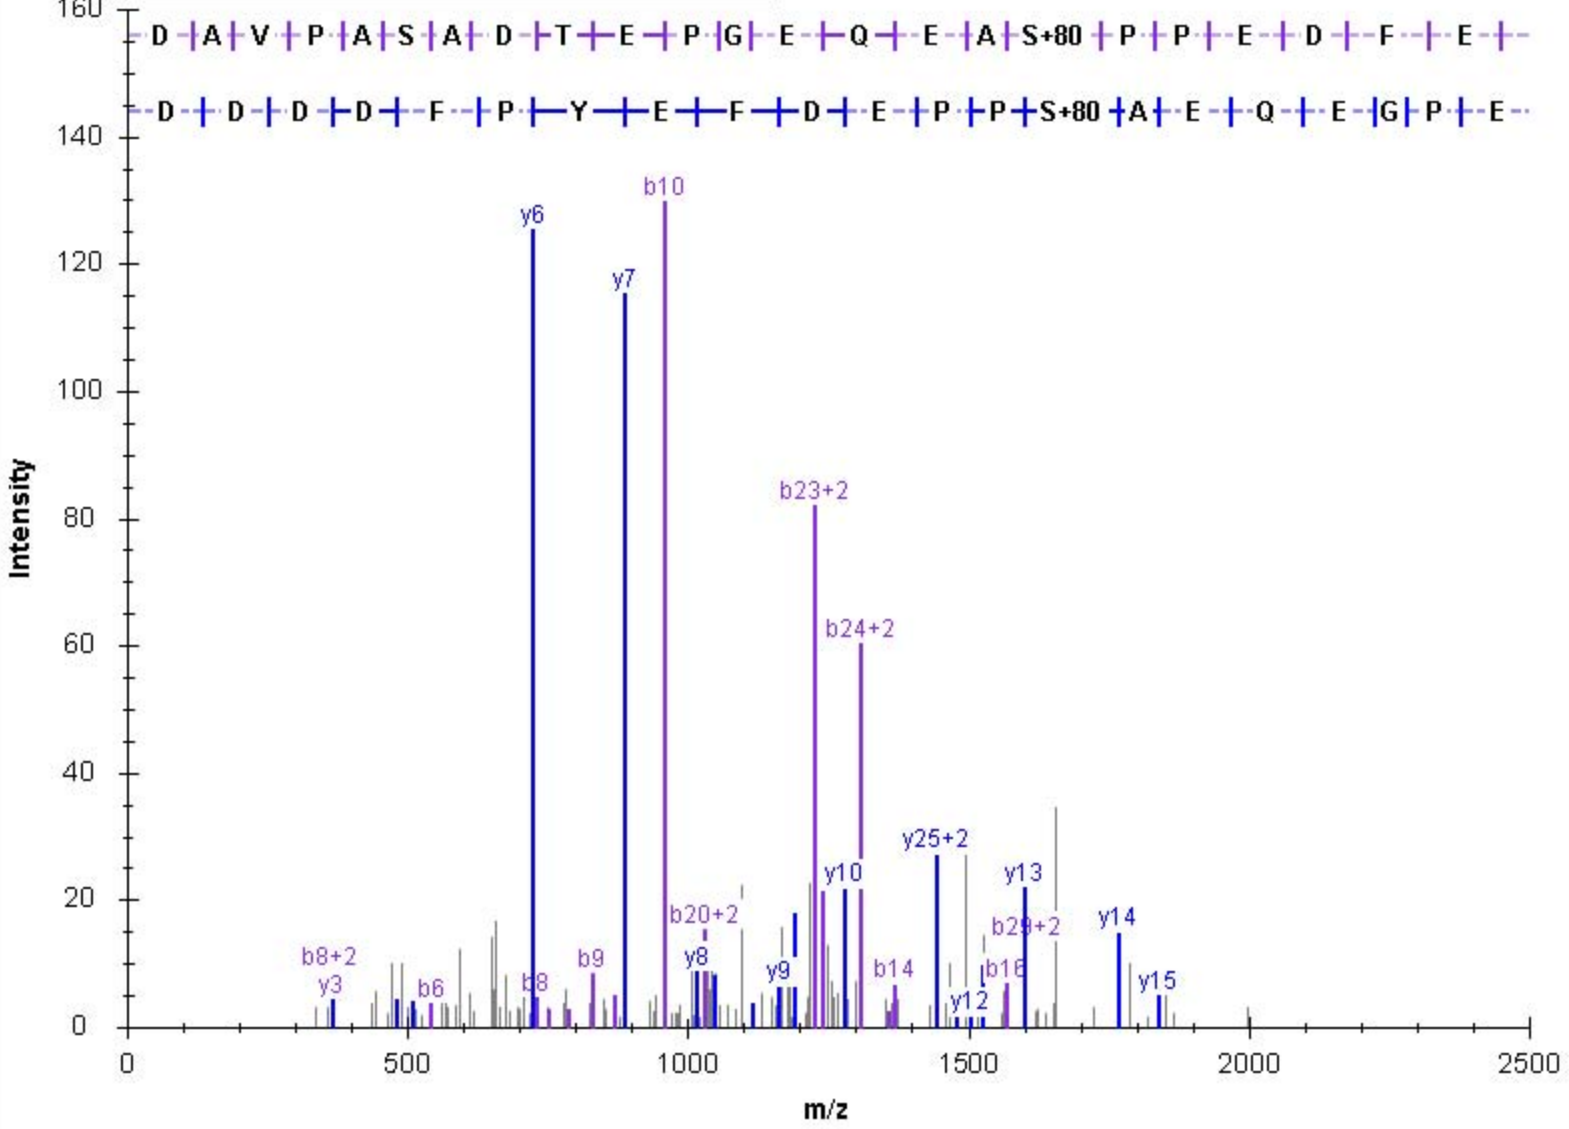

| b               | b(+2)           |    |   | y  | y(+2)           |                 |
|-----------------|-----------------|----|---|----|-----------------|-----------------|
| <b>116.034</b>  | 58.521          | 1  | D | 38 | 4213.901        | 2107.454        |
| 244.093         | 122.550         | 2  | Q | 37 | 4098.874        | 2049.941        |
| 359.120         | 180.064         | 3  | D | 36 | 3970.816        | 1985.912        |
| 472.204         | 236.606         | 4  | L | 35 | 3855.789        | <b>1928.398</b> |
| 585.288         | 293.148         | 5  | L | 34 | 3742.705        | 1871.856        |
| <b>700.315</b>  | 350.661         | 6  | D | 33 | 3629.621        | <b>1815.314</b> |
| 797.368         | 399.187         | 7  | P | 32 | 3514.594        | <b>1757.801</b> |
| 868.405         | 434.706         | 8  | A | 31 | 3417.541        | <b>1709.274</b> |
| 1024.506        | 512.757         | 9  | R | 30 | 3346.504        | <b>1673.756</b> |
| 1191.538        | 596.273         | 10 | S | 29 | 3190.403        | <b>1595.705</b> |
| 1306.565        | 653.786         | 11 | D | 28 | 3023.371        | 1512.189        |
| 1405.633        | <b>703.320</b>  | 12 | V | 27 | 2908.344        | <b>1454.676</b> |
| <b>1476.670</b> | 738.839         | 13 | A | 26 | 2809.275        | 1405.141        |
| <b>1577.718</b> | 789.363         | 14 | T | 25 | 2738.238        | <b>1369.623</b> |
| <b>1676.786</b> | 838.897         | 15 | V | 24 | 2637.191        | 1319.099        |
| <b>1763.818</b> | 882.413         | 16 | S | 23 | 2538.122        | <b>1269.565</b> |
| <b>1878.845</b> | 939.926         | 17 | D | 22 | 2451.090        | 1226.049        |
| 2009.886        | 1005.447        | 18 | M | 21 | 2336.063        | 1168.535        |
| 2140.926        | <b>1070.967</b> | 19 | M | 20 | 2205.023        | 1103.015        |
| 2269.969        | <b>1135.488</b> | 20 | E | 19 | 2073.982        | 1037.495        |
| 2369.037        | <b>1185.022</b> | 21 | V | 18 | 1944.940        | <b>972.973</b>  |
| 2484.064        | <b>1242.536</b> | 22 | D | 17 | <b>1845.871</b> | 923.439         |
| 2585.112        | <b>1293.060</b> | 23 | T | 16 | <b>1730.844</b> | 865.926         |
| 2684.180        | <b>1342.594</b> | 24 | V | 15 | <b>1629.797</b> | 815.402         |
| 2813.223        | 1407.115        | 25 | E | 14 | <b>1530.728</b> | 765.868         |
| 2941.282        | <b>1471.144</b> | 26 | Q | 13 | 1401.686        | 701.346         |
| 3028.314        | <b>1514.660</b> | 27 | S | 12 | <b>1273.627</b> | 637.317         |
| 3157.356        | <b>1579.182</b> | 28 | E | 11 | <b>1186.595</b> | 593.801         |
| 3254.409        | <b>1627.708</b> | 29 | P | 10 | <b>1057.552</b> | 529.280         |
| 3367.493        | <b>1684.250</b> | 30 | I | 9  | <b>960.500</b>  | 480.753         |
| 3438.530        | <b>1719.769</b> | 31 | A | 8  | <b>847.416</b>  | 424.211         |
| 3566.589        | <b>1783.798</b> | 32 | Q | 7  | <b>776.378</b>  | 388.693         |

controllerType=0 controllerNumber=1 scan=14807

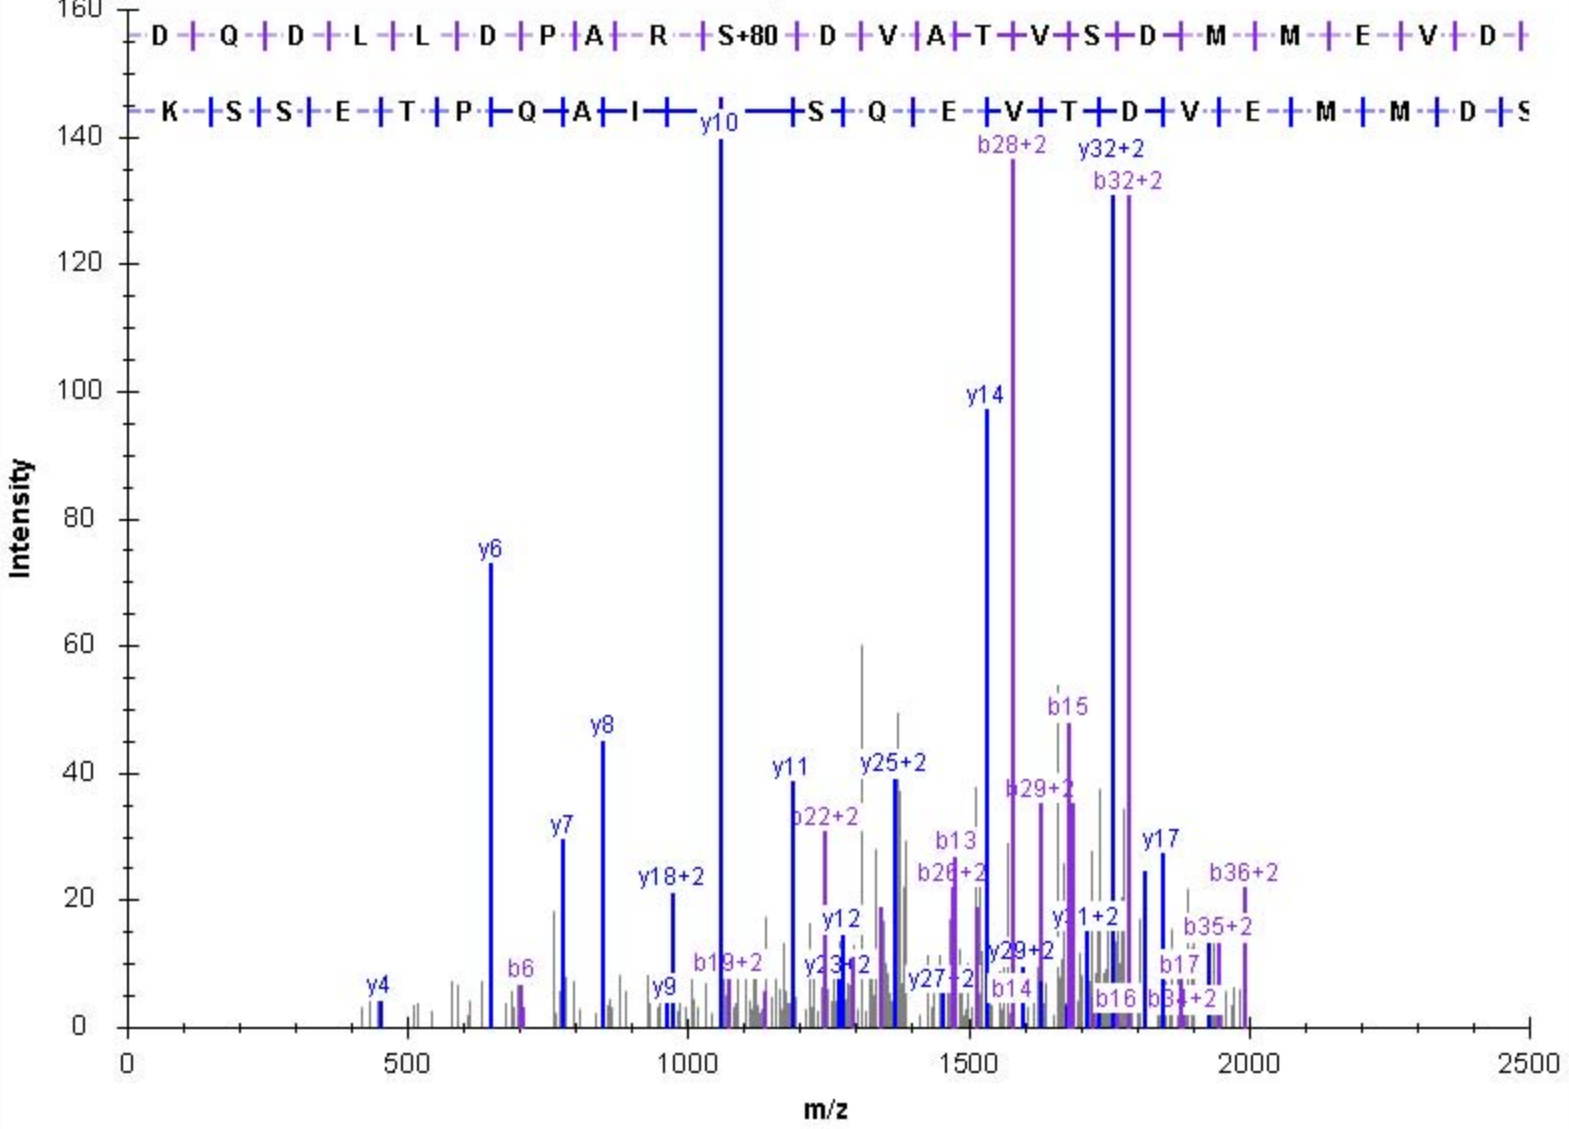

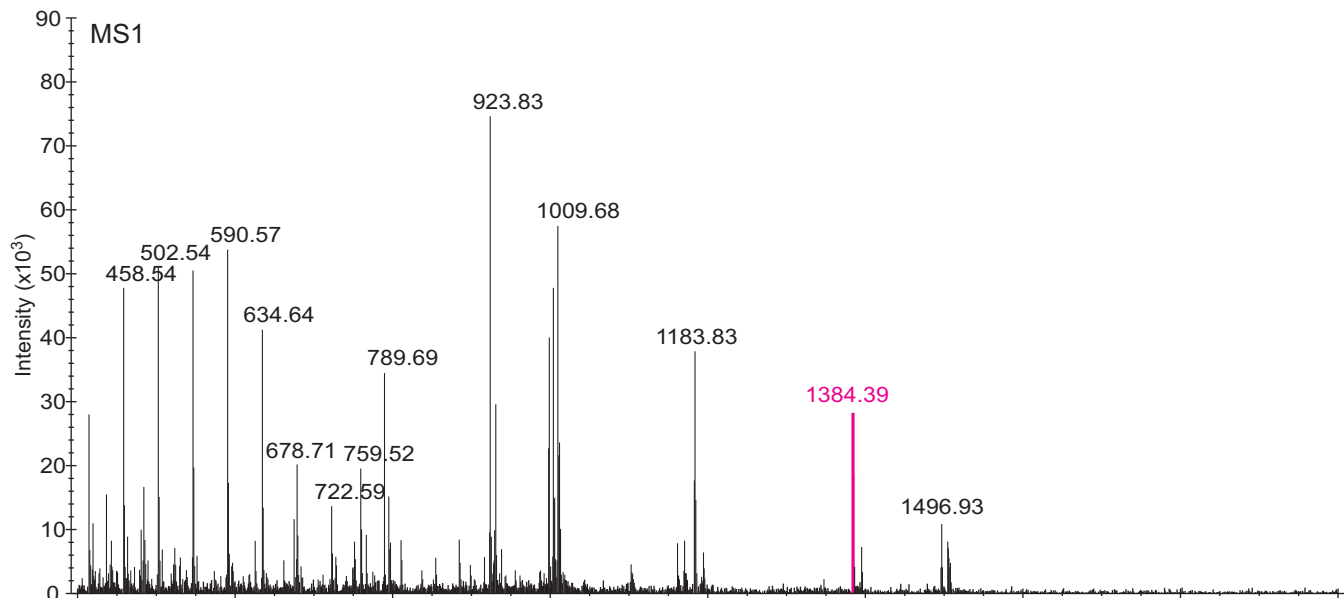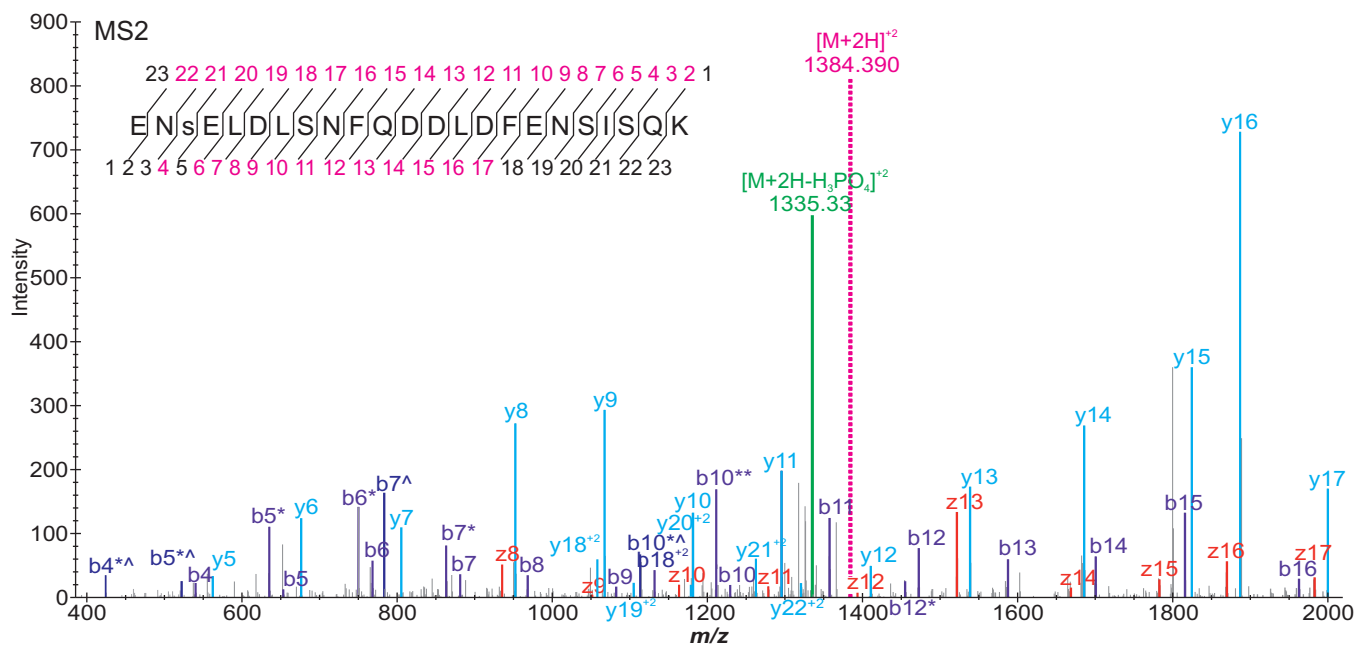

Supplemental Figure 2

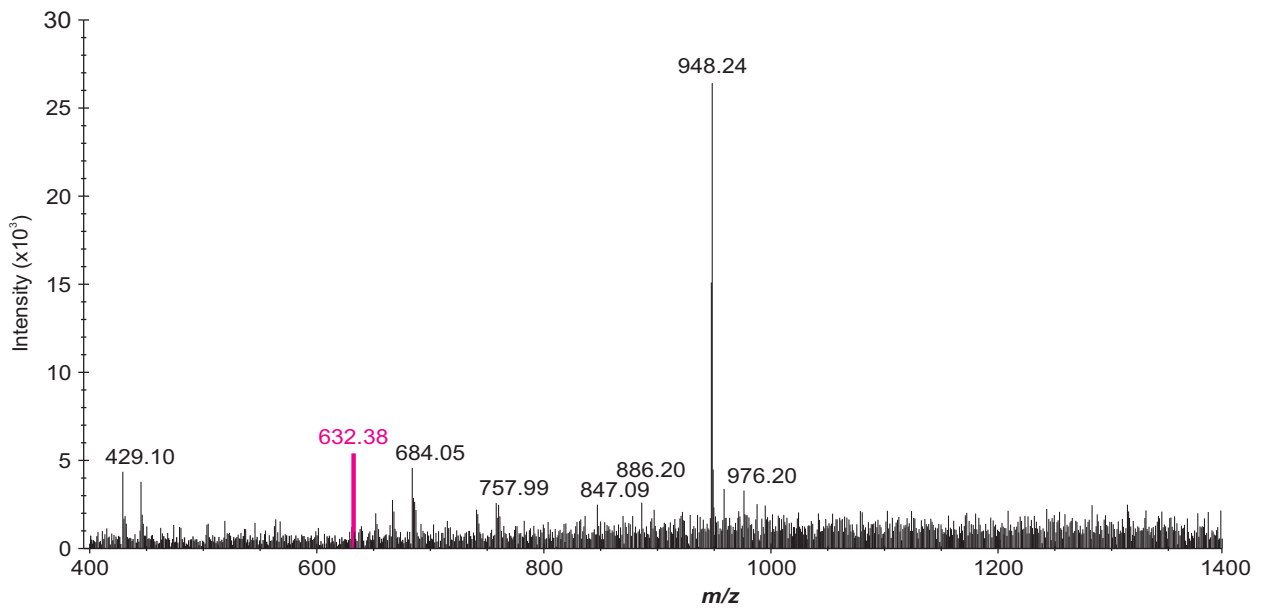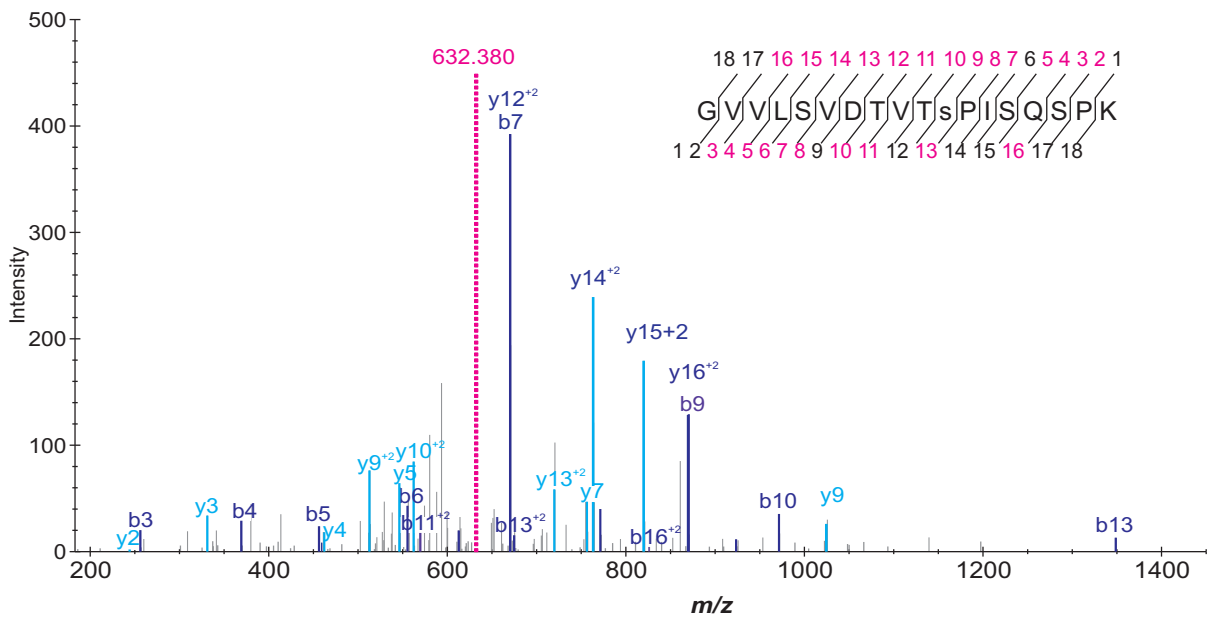

Supplemental Figure 3
